# Supplementary material
Source: publisher figshare collection journal article supplement (https://acs.figshare.com/ndownloader/files/3747937)
Supplement: Supplementary file 1 [file 3747937]

 
data_shelx
 
_audit_creation_method            'SHELXL-2014/7'
_shelx_SHELXL_version_number      '2014/7'
_chemical_name_systematic         ?
_chemical_name_common             ?
_chemical_melting_point           ?
_chemical_formula_moiety          ?
_chemical_formula_sum
 'C11 H17 O5' 
_chemical_formula_weight          229.24

loop_
 _atom_type_symbol
 _atom_type_description
 _atom_type_scat_dispersion_real
 _atom_type_scat_dispersion_imag
 _atom_type_scat_source
 'C'  'C'   0.0033   0.0016
 'International Tables Vol C Tables 4.2.6.8 and 6.1.1.4'
 'H'  'H'   0.0000   0.0000
 'International Tables Vol C Tables 4.2.6.8 and 6.1.1.4'
 'O'  'O'   0.0106   0.0060
 'International Tables Vol C Tables 4.2.6.8 and 6.1.1.4'
 
_space_group_crystal_system       monoclinic
_space_group_IT_number            14
_space_group_name_H-M_alt         'P 21/n'
_space_group_name_Hall            '-P 2yn'
 
_shelx_space_group_comment
;
The symmetry employed for this shelxl refinement is uniquely defined
by the following loop, which should always be used as a source of
symmetry information in preference to the above space-group names.
They are only intended as comments.
;
 
loop_
 _space_group_symop_operation_xyz
 'x, y, z'
 '-x+1/2, y+1/2, -z+1/2'
 '-x, -y, -z'
 'x-1/2, -y-1/2, z-1/2'
 
_cell_length_a                    6.4697(6)
_cell_length_b                    11.6627(11)
_cell_length_c                    16.0124(14)
_cell_angle_alpha                 90
_cell_angle_beta                  93.278(3)
_cell_angle_gamma                 90
_cell_volume                      1206.23(19)
_cell_formula_units_Z             4
_cell_measurement_temperature     150(2)
_cell_measurement_reflns_used     ?
_cell_measurement_theta_min       ?
_cell_measurement_theta_max       ?
 
_exptl_crystal_description        plate	
_exptl_crystal_colour             colorless
_exptl_crystal_density_meas       ?
_exptl_crystal_density_method     ?
_exptl_crystal_density_diffrn     1.262          
_exptl_crystal_F_000              492
_exptl_transmission_factor_min    ?
_exptl_transmission_factor_max    ?
_exptl_crystal_size_max           0.130
_exptl_crystal_size_mid           0.080
_exptl_crystal_size_min           0.050
_exptl_absorpt_coefficient_mu     0.099
_shelx_estimated_absorpt_T_min    0.987
_shelx_estimated_absorpt_T_max    0.995
_exptl_absorpt_correction_type    multi-scan
_exptl_absorpt_correction_T_min   0.991
_exptl_absorpt_correction_T_max   0.995
_exptl_absorpt_process_details    ?
_exptl_absorpt_special_details    ?
_diffrn_ambient_temperature       150(2)
_diffrn_radiation_wavelength      0.71073
_diffrn_radiation_type            MoK\a
_diffrn_source                    ?
_diffrn_measurement_device_type   'Bruker APEX-II CCD'
_diffrn_measurement_method        '\f and \w scans' 
_diffrn_detector_area_resol_mean  ?
_diffrn_reflns_number             36886
_diffrn_reflns_av_unetI/netI      0.0520
_diffrn_reflns_av_R_equivalents   0.0923
_diffrn_reflns_limit_h_min        -8
_diffrn_reflns_limit_h_max        8
_diffrn_reflns_limit_k_min        -14
_diffrn_reflns_limit_k_max        14
_diffrn_reflns_limit_l_min        -20
_diffrn_reflns_limit_l_max        20
_diffrn_reflns_theta_min          2.162
_diffrn_reflns_theta_max          27.169
_diffrn_reflns_theta_full         25.242
_diffrn_measured_fraction_theta_max   0.999
_diffrn_measured_fraction_theta_full  1.000
_diffrn_reflns_Laue_measured_fraction_max    0.999
_diffrn_reflns_Laue_measured_fraction_full   1.000
_diffrn_reflns_point_group_measured_fraction_max   0.999
_diffrn_reflns_point_group_measured_fraction_full  1.000
_reflns_number_total              2675
_reflns_number_gt                 1539
_reflns_threshold_expression      'I > 2\s(I)'
_reflns_Friedel_coverage          0.000
_reflns_Friedel_fraction_max      .
_reflns_Friedel_fraction_full     .
 
_reflns_special_details
;
 Reflections were merged by SHELXL according to the crystal
 class for the calculation of statistics and refinement.
 
 _reflns_Friedel_fraction is defined as the number of unique
 Friedel pairs measured divided by the number that would be
 possible theoretically, ignoring centric projections and
 systematic absences.
;
 
_computing_data_collection        ?
_computing_cell_refinement        ?
_computing_data_reduction         ?
_computing_structure_solution     ?
_computing_structure_refinement 'SHELXL-2014/7 (Sheldrick, 2014)'
_computing_molecular_graphics     ?
_computing_publication_material   ?
_refine_special_details           ?
_refine_ls_structure_factor_coef  Fsqd
_refine_ls_matrix_type            full
_refine_ls_weighting_scheme       calc
_refine_ls_weighting_details
'w=1/[\s^2^(Fo^2^)+(0.0810P)^2^+1.6909P] where P=(Fo^2^+2Fc^2^)/3'
_atom_sites_solution_primary      ?
_atom_sites_solution_secondary    ?
_atom_sites_solution_hydrogens    geom
_refine_ls_hydrogen_treatment     constr
_refine_ls_extinction_method      none
_refine_ls_extinction_coef        .
_refine_ls_number_reflns          2675
_refine_ls_number_parameters      150
_refine_ls_number_restraints      0
_refine_ls_R_factor_all           0.1458
_refine_ls_R_factor_gt            0.0780
_refine_ls_wR_factor_ref          0.2192
_refine_ls_wR_factor_gt           0.1823
_refine_ls_goodness_of_fit_ref    1.047
_refine_ls_restrained_S_all       1.047
_refine_ls_shift/su_max           0.000
_refine_ls_shift/su_mean          0.000
 
loop_
 _atom_site_label
 _atom_site_type_symbol
 _atom_site_fract_x
 _atom_site_fract_y
 _atom_site_fract_z
 _atom_site_U_iso_or_equiv
 _atom_site_adp_type
 _atom_site_occupancy
 _atom_site_site_symmetry_order  
 _atom_site_calc_flag
 _atom_site_refinement_flags_posn
 _atom_site_refinement_flags_adp
 _atom_site_refinement_flags_occupancy
 _atom_site_disorder_assembly
 _atom_site_disorder_group
O1 O 0.1112(3) 0.67814(18) 0.85166(13) 0.0359(6) Uani 1 1 d . . . . .
O2 O -0.1733(5) 0.7533(3) 0.78538(17) 0.0714(10) Uani 1 1 d . . . . .
O3 O -0.1777(4) 0.6316(2) 1.01379(19) 0.0637(8) Uani 1 1 d . . . . .
O4 O 0.2105(4) 0.8418(2) 1.01562(16) 0.0498(7) Uani 1 1 d . . . . .
O5 O 0.1292(4) 0.9620(2) 0.91298(17) 0.0616(8) Uani 1 1 d . . . . .
C1 C 0.2958(6) 0.6462(4) 1.0545(3) 0.0616(11) Uani 1 1 d . . . . .
H9 H 0.3284 0.6278 0.9970 0.092 Uiso 1 1 calc R U . . .
H8 H 0.2423 0.5776 1.0813 0.092 Uiso 1 1 calc R U . . .
H1 H 0.4214 0.6725 1.0859 0.092 Uiso 1 1 calc R U . . .
C2 C 0.1325(5) 0.7407(3) 1.0534(2) 0.0449(9) Uani 1 1 d . . . . .
H10 H 0.0969 0.7584 1.1120 0.054 Uiso 1 1 calc R U . . .
C3 C -0.0632(5) 0.7086(3) 1.0016(2) 0.0441(9) Uani 1 1 d . . . . .
C4 C -0.0930(5) 0.7961(3) 0.93079(19) 0.0326(7) Uani 1 1 d . . . . .
C5 C -0.0606(5) 0.7397(3) 0.8464(2) 0.0374(8) Uani 1 1 d . . . . .
C6 C 0.1833(5) 0.6110(3) 0.77959(19) 0.0350(8) Uani 1 1 d . . . . .
C7 C 0.3713(6) 0.5487(4) 0.8180(3) 0.0668(12) Uani 1 1 d . . . . .
H14 H 0.4768 0.6048 0.8368 0.100 Uiso 1 1 calc R U . . .
H15 H 0.4276 0.4979 0.7762 0.100 Uiso 1 1 calc R U . . .
H2 H 0.3309 0.5032 0.8659 0.100 Uiso 1 1 calc R U . . .
C8 C 0.2419(9) 0.6924(4) 0.7134(3) 0.0853(17) Uani 1 1 d . . . . .
H3 H 0.1164 0.7248 0.6855 0.128 Uiso 1 1 calc R U . . .
H16 H 0.3213 0.6517 0.6724 0.128 Uiso 1 1 calc R U . . .
H17 H 0.3265 0.7543 0.7388 0.128 Uiso 1 1 calc R U . . .
C9 C -0.2986(5) 0.8586(3) 0.9313(2) 0.0487(9) Uani 1 1 d . . . . .
H6 H -0.4118 0.8041 0.9194 0.073 Uiso 1 1 calc R U . . .
H4 H -0.3034 0.9187 0.8884 0.073 Uiso 1 1 calc R U . . .
H5 H -0.3132 0.8933 0.9863 0.073 Uiso 1 1 calc R U . . .
C10 C 0.0903(5) 0.8764(3) 0.9501(2) 0.0413(8) Uani 1 1 d . . . . .
C11 C 0.0236(7) 0.5240(4) 0.7530(3) 0.0747(14) Uani 1 1 d . . . . .
H13 H -0.0142 0.4795 0.8018 0.112 Uiso 1 1 calc R U . . .
H11 H 0.0794 0.4725 0.7116 0.112 Uiso 1 1 calc R U . . .
H12 H -0.0995 0.5630 0.7284 0.112 Uiso 1 1 calc R U . . .
 
loop_
 _atom_site_aniso_label
 _atom_site_aniso_U_11
 _atom_site_aniso_U_22
 _atom_site_aniso_U_33
 _atom_site_aniso_U_23
 _atom_site_aniso_U_13
 _atom_site_aniso_U_12
O1 0.0368(12) 0.0391(13) 0.0319(12) -0.0076(10) 0.0040(9) 0.0049(10)
O2 0.0719(19) 0.093(2) 0.0469(16) -0.0172(15) -0.0180(14) 0.0370(17)
O3 0.0598(17) 0.0526(17) 0.082(2) 0.0095(15) 0.0313(15) -0.0073(14)
O4 0.0456(14) 0.0496(15) 0.0543(16) -0.0071(13) 0.0037(12) -0.0040(12)
O5 0.079(2) 0.0442(16) 0.0635(17) -0.0041(14) 0.0258(15) -0.0165(14)
C1 0.054(2) 0.077(3) 0.053(2) 0.008(2) -0.0048(19) 0.015(2)
C2 0.0440(19) 0.062(2) 0.0296(17) -0.0001(17) 0.0061(14) -0.0010(18)
C3 0.044(2) 0.0353(19) 0.055(2) -0.0005(17) 0.0262(17) 0.0034(17)
C4 0.0346(17) 0.0318(17) 0.0319(17) -0.0002(13) 0.0066(13) 0.0016(14)
C5 0.0400(19) 0.0368(18) 0.0357(18) 0.0001(15) 0.0048(15) 0.0014(16)
C6 0.0437(19) 0.0307(16) 0.0315(17) -0.0059(13) 0.0092(14) -0.0001(14)
C7 0.060(3) 0.077(3) 0.064(3) -0.028(2) 0.003(2) 0.020(2)
C8 0.146(5) 0.055(3) 0.061(3) 0.014(2) 0.059(3) 0.017(3)
C9 0.041(2) 0.047(2) 0.058(2) -0.0097(18) 0.0013(17) 0.0080(17)
C10 0.047(2) 0.041(2) 0.0370(19) -0.0070(16) 0.0129(16) 0.0065(17)
C11 0.066(3) 0.064(3) 0.096(3) -0.044(3) 0.022(2) -0.019(2)
 
_geom_special_details
;
 All esds (except the esd in the dihedral angle between two l.s. planes)
 are estimated using the full covariance matrix.  The cell esds are taken
 into account individually in the estimation of esds in distances, angles
 and torsion angles; correlations between esds in cell parameters are only
 used when they are defined by crystal symmetry.  An approximate (isotropic)
 treatment of cell esds is used for estimating esds involving l.s. planes.
;
 
loop_
 _geom_bond_atom_site_label_1
 _geom_bond_atom_site_label_2
 _geom_bond_distance
 _geom_bond_site_symmetry_2
 _geom_bond_publ_flag
O1 C5 1.322(4) . ?
O1 C6 1.492(4) . ?
O2 C5 1.196(4) . ?
O3 C3 1.188(4) . ?
O4 C10 1.333(4) . ?
O4 C2 1.430(4) . ?
O5 C10 1.196(4) . ?
C1 C2 1.526(5) . ?
C1 H9 0.9800 . ?
C1 H8 0.9800 . ?
C1 H1 0.9800 . ?
C2 C3 1.520(5) . ?
C2 H10 1.0000 . ?
C3 C4 1.530(5) . ?
C4 C9 1.517(5) . ?
C4 C5 1.528(4) . ?
C4 C10 1.528(5) . ?
C6 C8 1.488(5) . ?
C6 C11 1.492(5) . ?
C6 C7 1.516(5) . ?
C7 H14 0.9800 . ?
C7 H15 0.9800 . ?
C7 H2 0.9800 . ?
C8 H3 0.9800 . ?
C8 H16 0.9800 . ?
C8 H17 0.9800 . ?
C9 H6 0.9800 . ?
C9 H4 0.9800 . ?
C9 H5 0.9800 . ?
C11 H13 0.9800 . ?
C11 H11 0.9800 . ?
C11 H12 0.9800 . ?
 
loop_
 _geom_angle_atom_site_label_1
 _geom_angle_atom_site_label_2
 _geom_angle_atom_site_label_3
 _geom_angle
 _geom_angle_site_symmetry_1
 _geom_angle_site_symmetry_3
 _geom_angle_publ_flag
C5 O1 C6 122.3(2) . . ?
C10 O4 C2 112.3(3) . . ?
C2 C1 H9 109.5 . . ?
C2 C1 H8 109.5 . . ?
H9 C1 H8 109.5 . . ?
C2 C1 H1 109.5 . . ?
H9 C1 H1 109.5 . . ?
H8 C1 H1 109.5 . . ?
O4 C2 C3 106.0(3) . . ?
O4 C2 C1 109.8(3) . . ?
C3 C2 C1 112.5(3) . . ?
O4 C2 H10 109.5 . . ?
C3 C2 H10 109.5 . . ?
C1 C2 H10 109.5 . . ?
O3 C3 C2 127.2(4) . . ?
O3 C3 C4 124.9(4) . . ?
C2 C3 C4 107.8(3) . . ?
C9 C4 C5 112.1(3) . . ?
C9 C4 C10 112.0(3) . . ?
C5 C4 C10 107.4(2) . . ?
C9 C4 C3 113.0(3) . . ?
C5 C4 C3 110.6(3) . . ?
C10 C4 C3 101.3(3) . . ?
O2 C5 O1 126.6(3) . . ?
O2 C5 C4 123.9(3) . . ?
O1 C5 C4 109.5(3) . . ?
C8 C6 O1 108.6(3) . . ?
C8 C6 C11 115.5(4) . . ?
O1 C6 C11 109.6(3) . . ?
C8 C6 C7 111.3(4) . . ?
O1 C6 C7 102.5(3) . . ?
C11 C6 C7 108.5(3) . . ?
C6 C7 H14 109.5 . . ?
C6 C7 H15 109.5 . . ?
H14 C7 H15 109.5 . . ?
C6 C7 H2 109.5 . . ?
H14 C7 H2 109.5 . . ?
H15 C7 H2 109.5 . . ?
C6 C8 H3 109.5 . . ?
C6 C8 H16 109.5 . . ?
H3 C8 H16 109.5 . . ?
C6 C8 H17 109.5 . . ?
H3 C8 H17 109.5 . . ?
H16 C8 H17 109.5 . . ?
C4 C9 H6 109.5 . . ?
C4 C9 H4 109.5 . . ?
H6 C9 H4 109.5 . . ?
C4 C9 H5 109.5 . . ?
H6 C9 H5 109.5 . . ?
H4 C9 H5 109.5 . . ?
O5 C10 O4 120.9(3) . . ?
O5 C10 C4 126.5(3) . . ?
O4 C10 C4 112.6(3) . . ?
C6 C11 H13 109.5 . . ?
C6 C11 H11 109.5 . . ?
H13 C11 H11 109.5 . . ?
C6 C11 H12 109.5 . . ?
H13 C11 H12 109.5 . . ?
H11 C11 H12 109.5 . . ?
 
loop_
 _geom_torsion_atom_site_label_1
 _geom_torsion_atom_site_label_2
 _geom_torsion_atom_site_label_3
 _geom_torsion_atom_site_label_4
 _geom_torsion
 _geom_torsion_site_symmetry_1
 _geom_torsion_site_symmetry_2
 _geom_torsion_site_symmetry_3
 _geom_torsion_site_symmetry_4
 _geom_torsion_publ_flag
C10 O4 C2 C3 1.1(4) . . . . ?
C10 O4 C2 C1 122.8(3) . . . . ?
O4 C2 C3 O3 -177.6(3) . . . . ?
C1 C2 C3 O3 62.3(5) . . . . ?
O4 C2 C3 C4 0.7(3) . . . . ?
C1 C2 C3 C4 -119.3(3) . . . . ?
O3 C3 C4 C9 56.5(4) . . . . ?
C2 C3 C4 C9 -121.8(3) . . . . ?
O3 C3 C4 C5 -69.9(4) . . . . ?
C2 C3 C4 C5 111.7(3) . . . . ?
O3 C3 C4 C10 176.5(3) . . . . ?
C2 C3 C4 C10 -1.9(3) . . . . ?
C6 O1 C5 O2 -2.8(5) . . . . ?
C6 O1 C5 C4 179.0(2) . . . . ?
C9 C4 C5 O2 7.4(5) . . . . ?
C10 C4 C5 O2 -116.0(4) . . . . ?
C3 C4 C5 O2 134.4(4) . . . . ?
C9 C4 C5 O1 -174.4(3) . . . . ?
C10 C4 C5 O1 62.2(3) . . . . ?
C3 C4 C5 O1 -47.4(3) . . . . ?
C5 O1 C6 C8 66.8(4) . . . . ?
C5 O1 C6 C11 -60.3(4) . . . . ?
C5 O1 C6 C7 -175.3(3) . . . . ?
C2 O4 C10 O5 177.3(3) . . . . ?
C2 O4 C10 C4 -2.5(4) . . . . ?
C9 C4 C10 O5 -56.5(4) . . . . ?
C5 C4 C10 O5 66.9(4) . . . . ?
C3 C4 C10 O5 -177.1(3) . . . . ?
C9 C4 C10 O4 123.3(3) . . . . ?
C5 C4 C10 O4 -113.3(3) . . . . ?
C3 C4 C10 O4 2.7(3) . . . . ?
 
loop_
 _geom_hbond_atom_site_label_D 
 _geom_hbond_atom_site_label_H 
 _geom_hbond_atom_site_label_A 
 _geom_hbond_distance_DH 
 _geom_hbond_distance_HA 
 _geom_hbond_distance_DA 
 _geom_hbond_angle_DHA 
 _geom_hbond_site_symmetry_A 
C11 H12 O2  0.98 2.46 3.019(5) 116.1 .
C8 H16 O5  0.98 2.63 3.493(5) 147.2 2_546
C8 H3 O2  0.98 2.55 3.066(6) 112.5 .
C8 H3 O2  0.98 2.55 3.066(6) 112.5 .
C8 H16 O5  0.98 2.63 3.493(5) 147.2 2_546
C11 H12 O2  0.98 2.46 3.019(5) 116.1 .
 
_refine_diff_density_max    0.719
_refine_diff_density_min   -0.236
_refine_diff_density_rms    0.060

_shelx_res_file
;

    shelx.res created by SHELXL-2014/7

TITL JLW14_0m in P2(1)/n
CELL  0.71073   6.4697  11.6627  16.0124   90.000   93.278   90.000
ZERR     4.00   0.0006   0.0011   0.0014    0.000    0.003    0.000
LATT   1
SYMM  1/2 - X, 1/2 + Y, 1/2 - Z
SFAC  C    H    O
UNIT  44 68 20
MERG   2
HTAB C11 O2
HTAB C8 O5_$1
EQIV $1 -x+1/2, y-1/2, -z+3/2
HTAB C8 O2
HTAB C8 O2
HTAB C8 O5_$1
HTAB C11 O2
FMAP   2
SIZE     0.050   0.080   0.130
ACTA
plan 20
BOND   $H
CONF
L.S.  10
TEMP  -123.16
WGHT    0.081000    1.690900
FVAR       0.23199
O1    3    0.111167    0.678138    0.851659    11.00000    0.03681    0.03913 =
         0.03191   -0.00761    0.00395    0.00488
O2    3   -0.173346    0.753276    0.785381    11.00000    0.07191    0.09299 =
         0.04692   -0.01725   -0.01801    0.03705
O3    3   -0.177720    0.631595    1.013787    11.00000    0.05981    0.05264 =
         0.08177    0.00951    0.03135   -0.00726
O4    3    0.210499    0.841765    1.015623    11.00000    0.04557    0.04958 =
         0.05434   -0.00711    0.00371   -0.00402
O5    3    0.129167    0.962018    0.912979    11.00000    0.07947    0.04422 =
         0.06354   -0.00414    0.02585   -0.01647
C1    1    0.295763    0.646210    1.054536    11.00000    0.05397    0.07718 =
         0.05270    0.00760   -0.00484    0.01465
AFIX 137
H9    2    0.328417    0.627827    0.997041    11.00000   -1.50000
H8    2    0.242325    0.577634    1.081343    11.00000   -1.50000
H1    2    0.421384    0.672471    1.085936    11.00000   -1.50000
AFIX   0
C2    1    0.132476    0.740748    1.053428    11.00000    0.04405    0.06164 =
         0.02962   -0.00010    0.00614   -0.00103
AFIX  13
H10   2    0.096935    0.758364    1.112021    11.00000   -1.20000
AFIX   0
C3    1   -0.063157    0.708627    1.001632    11.00000    0.04449    0.03527 =
         0.05524   -0.00054    0.02618    0.00339
C4    1   -0.092973    0.796087    0.930788    11.00000    0.03465    0.03181 =
         0.03194   -0.00021    0.00664    0.00156
C5    1   -0.060606    0.739707    0.846378    11.00000    0.04003    0.03681 =
         0.03568    0.00006    0.00484    0.00136
C6    1    0.183337    0.610960    0.779589    11.00000    0.04371    0.03065 =
         0.03146   -0.00588    0.00923   -0.00012
C7    1    0.371263    0.548721    0.817988    11.00000    0.05972    0.07726 =
         0.06352   -0.02787    0.00337    0.02004
AFIX 137
H14   2    0.476763    0.604789    0.836765    11.00000   -1.50000
H15   2    0.427603    0.497920    0.776160    11.00000   -1.50000
H2    2    0.330920    0.503214    0.865866    11.00000   -1.50000
AFIX   0
C8    1    0.241883    0.692389    0.713421    11.00000    0.14550    0.05515 =
         0.06142    0.01442    0.05916    0.01686
AFIX 137
H3    2    0.116419    0.724826    0.685497    11.00000   -1.50000
H16   2    0.321330    0.651699    0.672357    11.00000   -1.50000
H17   2    0.326460    0.754276    0.738826    11.00000   -1.50000
AFIX   0
C9    1   -0.298550    0.858595    0.931274    11.00000    0.04068    0.04704 =
         0.05832   -0.00967    0.00128    0.00798
AFIX 137
H6    2   -0.411774    0.804136    0.919358    11.00000   -1.50000
H4    2   -0.303447    0.918691    0.888430    11.00000   -1.50000
H5    2   -0.313224    0.893333    0.986347    11.00000   -1.50000
AFIX   0
C10   1    0.090265    0.876396    0.950070    11.00000    0.04710    0.04103 =
         0.03698   -0.00697    0.01295    0.00651
C11   1    0.023559    0.524017    0.753045    11.00000    0.06612    0.06405 =
         0.09588   -0.04412    0.02161   -0.01888
AFIX 137
H13   2   -0.014168    0.479477    0.801790    11.00000   -1.50000
H11   2    0.079414    0.472507    0.711551    11.00000   -1.50000
H12   2   -0.099492    0.562974    0.728365    11.00000   -1.50000
AFIX   0
HKLF    4  1.0  1.00  0.00  0.00  0.00  1.00  0.00  0.00  0.00  1.00

REM  JLW14_0m in P2(1)/n
REM R1 =  0.0780 for    1539 Fo > 4sig(Fo)  and  0.1458 for all    2675 data
REM    150 parameters refined using      0 restraints

END

WGHT      0.0815      1.6863

REM Highest difference peak  0.719,  deepest hole -0.236,  1-sigma level  0.060
Q1    1  -0.0269  0.6886  1.0588  11.00000  0.05    0.72
Q2    1  -0.3175  0.6189  0.9739  11.00000  0.05    0.56
Q3    1   0.4145  0.6188  0.7845  11.00000  0.05    0.54
Q4    1   0.1132  0.6655  0.6833  11.00000  0.05    0.48
Q5    1   0.3498  0.7452  1.0561  11.00000  0.05    0.32
Q6    1  -0.2241  0.6943  0.8170  11.00000  0.05    0.28
Q7    1  -0.0851  0.7626  0.9656  11.00000  0.05    0.22
Q8    1   0.1962  0.7668  0.6966  11.00000  0.05    0.21
Q9    1  -0.1554  0.6942  0.9992  11.00000  0.05    0.20
Q10   1   0.2222  0.9045  0.9488  11.00000  0.05    0.20
Q11   1  -0.0727  0.6589  0.9835  11.00000  0.05    0.18
Q12   1  -0.0753  0.7790  0.8942  11.00000  0.05    0.18
Q13   1   0.2269  0.6403  0.6584  11.00000  0.05    0.18
Q14   1  -0.0964  0.7712  0.7995  11.00000  0.05    0.18
Q15   1   0.0289  0.5600  0.7383  11.00000  0.05    0.17
Q16   1  -0.1631  0.8282  0.9234  11.00000  0.05    0.17
Q17   1   0.4575  0.5654  0.8635  11.00000  0.05    0.17
Q18   1  -0.0814  0.4945  0.7752  11.00000  0.05    0.17
Q19   1   0.1536  0.5152  0.7872  11.00000  0.05    0.16
Q20   1   0.1218  0.8031  1.0640  11.00000  0.05    0.16
;
_shelx_res_checksum   68735

_shelx_hkl_file
;
  -1   0   0    0.02    0.12
  -1   0   0   -0.01    0.11
  -1   0   0   -0.17    0.10
  -1   0   0   -0.09    0.09
  -1   0   0   -0.12    0.09
  -1   0   0   -0.15    0.05
   1   0   0   -0.15    0.05
   1   0   0   -0.18    0.09
   1   0   0   -0.15    0.10
   1   0   0   -0.08    0.09
   1   0   0   -0.16    0.10
  -2   0   0  105.76    2.72
  -2   0   0  104.88    2.50
  -2   0   0  102.55    2.67
  -2   0   0  102.88    2.68
  -2   0   0  109.69    2.77
  -2   0   0  104.38    2.75
   2   0   0  108.08    2.72
   2   0   0  110.13    2.81
   2   0   0  104.52    2.73
   2   0   0  106.11    2.52
  -3   0   0    0.02    0.29
  -3   0   0   -0.11    0.33
  -3   0   0   -0.43    0.40
  -3   0   0    0.15    0.30
  -3   0   0    0.05    0.17
  -3   0   0   -0.30    0.30
  -3   0   0   -0.13    0.29
   3   0   0   -0.35    0.40
   3   0   0   -0.07    0.32
   3   0   0    0.00    0.29
   3   0   0   -0.08    0.18
   3   0   0    0.12    0.35
  -4   0   0   54.09    1.95
  -4   0   0   56.13    1.98
  -4   0   0   54.95    2.09
  -4   0   0   57.49    1.62
  -4   0   0   56.76    2.02
  -4   0   0   57.66    2.21
  -4   0   0   57.38    2.01
   4   0   0   55.86    1.97
   4   0   0   54.45    2.01
   4   0   0   53.88    1.98
   4   0   0   56.27    2.12
   4   0   0   55.59    1.65
   4   0   0   56.25    1.82
  -5   0   0   -0.31    0.59
  -5   0   0   -1.10    0.67
  -5   0   0    1.53    0.63
  -5   0   0   -0.22    0.60
  -5   0   0    0.48    0.37
  -5   0   0    0.77    0.91
  -5   0   0    0.76    0.75
   5   0   0   -0.13    0.40
   5   0   0   -0.22    0.60
   5   0   0   -1.39    0.62
   5   0   0    0.51    0.69
   5   0   0   -0.92    0.74
   5   0   0    0.11    0.65
  -6   0   0    0.40    0.87
  -6   0   0    0.80    0.79
  -6   0   0   -1.09    0.84
  -6   0   0    0.26    0.52
   6   0   0    1.86    0.93
   6   0   0    0.95    1.22
   6   0   0   -0.27    1.11
   6   0   0   -0.06    0.84
  -7   0   0    1.40    1.22
  -7   0   0   -1.55    1.33
  -7   0   0    0.73    1.09
   7   0   0   -0.15    1.26
   7   0   0    1.46    1.50
   7   0   0    1.83    1.38
   7   0   0   -1.10    1.47
  -8   0   0    1.76    1.58
  -8   0   0    2.68    1.95
  -8   0   0    0.73    1.75
   8   0   0    0.70    2.01
   8   0   0    1.53    1.81
   8  -1   0   -2.80    1.69
   8  -1   0    1.10    2.11
  -8   1   0   -0.80    1.75
  -8   1   0    3.86    1.74
  -8   1   0    1.71    1.50
   7  -1   0   -1.08    1.16
   7  -1   0    0.62    1.52
   7  -1   0   -2.29    1.35
  -7   1   0   -1.00    0.98
  -7   1   0    0.96    1.11
  -7   1   0    0.38    1.21
   6  -1   0    4.47    0.97
   6  -1   0    2.35    1.11
   6  -1   0    3.21    0.98
   6  -1   0    2.69    1.12
  -6   1   0    2.00    0.44
  -6   1   0    2.55    0.93
  -6   1   0    3.89    0.96
  -6   1   0    3.56    0.90
   5  -1   0    6.18    0.80
   5  -1   0    7.52    1.03
   5  -1   0    6.76    0.92
   5  -1   0    9.01    1.07
   5  -1   0    8.07    1.04
  -5   1   0    8.04    1.02
  -5   1   0    7.47    1.19
  -5   1   0    6.45    0.88
  -5   1   0    8.29    1.05
  -5   1   0    7.73    0.93
  -5   1   0    6.26    0.91
  -5   1   0    6.73    0.57
   4  -1   0    7.69    0.48
   4  -1   0    8.11    0.85
   4  -1   0    7.11    0.89
   4  -1   0    6.14    0.70
   4  -1   0    7.32    0.83
   4  -1   0    8.86    0.77
  -4   1   0    7.14    0.87
  -4   1   0    7.43    0.81
  -4   1   0    7.99    0.85
  -4   1   0    8.18    0.82
  -4   1   0    6.68    0.90
  -4   1   0    8.04    0.47
  -4   1   0    7.44    0.79
   3  -1   0    7.06    0.57
   3  -1   0    6.19    0.58
   3  -1   0    6.79    0.61
   3  -1   0    6.16    0.69
   3  -1   0    6.93    0.36
   3  -1   0    6.97    0.75
  -3   1   0    7.24    0.34
  -3   1   0    6.33    0.57
  -3   1   0    6.96    0.28
  -3   1   0    6.64    0.67
  -3   1   0    6.50    0.61
  -3   1   0    7.05    0.72
  -3   1   0    7.64    0.66
   2  -1   0   -0.02    0.07
   2  -1   0    0.15    0.19
   2  -1   0    0.27    0.24
   2  -1   0    0.06    0.24
   2  -1   0    0.12    0.20
  -2   1   0    0.16    0.07
  -2   1   0    0.36    0.21
  -2   1   0   -0.43    0.19
  -2   1   0    0.35    0.26
  -2   1   0    0.01    0.21
   1  -1   0    0.13    0.13
   1  -1   0    0.01    0.13
   1  -1   0    0.21    0.12
   1  -1   0   -0.06    0.07
   1  -1   0   -0.05    0.10
   1  -1   0    0.15    0.12
  -1   1   0   -0.03    0.14
  -1   1   0    0.14    0.10
  -1   1   0    0.07    0.12
  -1   1   0   -0.11    0.11
  -1   1   0   -0.05    0.10
  -1  -1   0   -0.05    0.11
  -1  -1   0   -0.11    0.10
  -1  -1   0   -0.11    0.18
  -1  -1   0    0.11    0.10
  -1  -1   0    0.04    0.11
  -1  -1   0    0.09    0.11
   1   1   0   -0.08    0.10
   1   1   0   -0.02    0.16
   1   1   0    0.09    0.12
   1   1   0    0.20    0.11
   1   1   0    0.07    0.11
   1   1   0    0.10    0.13
  -2  -1   0    0.11    0.29
  -2  -1   0   -0.40    0.15
  -2  -1   0    0.08    0.24
  -2  -1   0    0.45    0.22
  -2  -1   0   -0.26    0.22
  -2  -1   0    0.10    0.27
   2   1   0    0.23    0.15
   2   1   0    0.13    0.15
   2   1   0    0.26    0.22
   2   1   0    0.06    0.27
   2   1   0    0.17    0.20
   2   1   0   -0.23    0.20
  -3  -1   0    5.66    0.62
  -3  -1   0    7.67    0.66
  -3  -1   0    7.54    0.51
  -3  -1   0    6.72    0.66
  -3  -1   0    6.82    0.60
  -3  -1   0    6.41    0.73
   3   1   0    7.18    0.76
   3   1   0    6.55    0.67
   3   1   0    6.96    0.56
   3   1   0    6.01    0.60
  -4  -1   0    7.87    0.90
  -4  -1   0    7.94    0.78
  -4  -1   0    8.32    0.79
  -4  -1   0    7.40    0.80
  -4  -1   0    6.85    0.92
  -4  -1   0    7.44    0.85
   4   1   0    7.96    0.82
   4   1   0    8.72    0.69
   4   1   0    7.88    0.88
   4   1   0    7.13    0.89
  -5  -1   0    8.51    1.07
  -5  -1   0    5.53    0.91
  -5  -1   0    5.82    1.04
  -5  -1   0    7.74    0.76
  -5  -1   0    7.32    0.97
  -5  -1   0    6.98    0.95
  -5  -1   0    8.78    1.19
   5   1   0    7.14    0.79
   5   1   0    8.49    1.00
   5   1   0    7.07    0.74
   5   1   0    7.20    1.02
   5   1   0    8.57    1.10
   5   1   0    6.88    1.03
  -6  -1   0    4.65    1.10
  -6  -1   0    3.82    0.68
  -6  -1   0    4.09    1.11
  -6  -1   0    3.15    0.92
   6   1   0    3.77    0.72
   6   1   0    3.92    0.98
   6   1   0    4.12    1.33
   6   1   0    3.13    1.05
   6   1   0    2.43    1.33
  -7  -1   0    2.11    1.31
  -7  -1   0    0.55    1.22
  -7  -1   0    0.75    1.14
   7   1   0   -0.15    1.26
   7   1   0    0.47    1.51
   7   1   0   -0.32    1.26
   7   1   0    0.66    1.41
  -8  -1   0    0.88    1.80
  -8  -1   0    0.19    1.58
  -8  -1   0   -1.25    1.53
   8   1   0    0.51    1.89
   8   1   0    1.27    2.10
   8  -2   0   -0.61    1.80
   8  -2   0   -0.13    2.06
  -8   2   0    1.05    1.70
  -8   2   0   -0.48    1.58
  -8   2   0   -0.85    1.95
   7  -2   0   -0.74    1.41
   7  -2   0    0.41    1.42
   7  -2   0   -0.57    1.19
  -7   2   0    0.29    1.11
  -7   2   0   -0.97    1.16
  -7   2   0   -1.55    1.03
   6  -2   0    4.90    0.98
   6  -2   0    2.68    1.07
   6  -2   0    1.86    0.90
   6  -2   0    4.95    1.11
  -6   2   0    1.59    0.89
  -6   2   0    3.30    1.08
  -6   2   0   -1.13    1.46
  -6   2   0    1.60    0.88
   5  -2   0    0.40    0.74
   5  -2   0    1.45    0.80
   5  -2   0    0.03    0.65
   5  -2   0    0.20    0.76
   5  -2   0    0.46    0.60
  -5   2   0    1.38    0.65
  -5   2   0    0.27    0.67
  -5   2   0    1.12    0.67
  -5   2   0    1.10    0.68
  -5   2   0   -1.10    0.90
   4  -2   0    3.82    0.75
   4  -2   0    4.00    0.63
   4  -2   0    2.82    0.70
   4  -2   0    3.52    0.57
   4  -2   0    2.87    0.62
  -4   2   0    2.32    0.58
  -4   2   0    3.70    0.22
  -4   2   0    3.55    0.57
  -4   2   0    3.83    0.68
  -4   2   0    3.49    0.32
  -4   2   0    4.17    0.72
   3  -2   0    0.28    0.36
   3  -2   0    0.23    0.31
   3  -2   0   -0.18    0.36
   3  -2   0   -0.19    0.33
   3  -2   0   -0.10    0.28
   3  -2   0    0.31    0.37
  -3   2   0    0.11    0.34
  -3   2   0    0.18    0.44
  -3   2   0    0.09    0.28
  -3   2   0    0.22    0.32
   2  -2   0   17.00    0.62
   2  -2   0   17.16    0.85
   2  -2   0   15.28    0.72
   2  -2   0   16.88    0.79
   2  -2   0   15.84    0.77
   2  -2   0   17.31    0.71
  -2   2   0   16.11    0.75
  -2   2   0   16.58    0.80
  -2   2   0   16.71    0.76
  -2   2   0   17.44    0.75
   1  -2   0   52.38    1.46
   1  -2   0   54.00    1.52
   1  -2   0   55.95    1.48
   1  -2   0   56.27    1.53
   1  -2   0   56.77    1.31
   1  -2   0   54.84    1.29
   1  -2   0   54.85    1.52
  -1   2   0   58.27    1.55
  -1   2   0   54.04    1.31
  -1   2   0   57.04    1.52
  -1   2   0   55.69    1.50
  -1   2   0   55.68    1.48
   0  -2   0  477.12   10.65
   0  -2   0  492.24   10.75
   0  -2   0  472.50   10.64
   0  -2   0  485.92   10.71
   0  -2   0  492.45   10.64
   0   2   0  496.14   10.71
   0   2   0  491.39   10.75
   0   2   0  475.08   10.64
   0   2   0  470.41   10.65
   0   2   0  476.22   10.62
  -1  -2   0   57.11    1.53
  -1  -2   0   55.43    1.50
  -1  -2   0   54.58    1.40
  -1  -2   0   54.13    1.63
  -1  -2   0   54.07    1.54
  -1  -2   0   53.87    1.46
  -1  -2   0   56.75    1.44
   1   2   0   57.58    1.48
   1   2   0   56.93    1.53
   1   2   0   57.51    1.51
   1   2   0   56.23    1.65
   1   2   0   55.85    1.54
   1   2   0   54.99    1.44
  -2  -2   0   15.96    0.88
  -2  -2   0   16.08    0.79
  -2  -2   0   15.29    0.70
  -2  -2   0   16.13    0.75
  -2  -2   0   16.22    0.72
  -2  -2   0   18.40    0.76
   2   2   0   15.30    0.89
   2   2   0   16.04    0.72
   2   2   0   15.38    0.76
   2   2   0   14.36    0.68
   2   2   0   16.26    0.75
   2   2   0   16.35    0.73
  -3  -2   0   -0.04    0.32
  -3  -2   0   -0.03    0.34
  -3  -2   0    0.37    0.32
  -3  -2   0    0.11    0.51
  -3  -2   0    0.35    0.36
  -3  -2   0   -0.07    0.29
   3   2   0    0.04    0.30
   3   2   0    0.15    0.30
   3   2   0    0.64    0.36
   3   2   0    0.55    0.36
   3   2   0    0.43    0.49
   3   2   0    0.53    0.34
  -4  -2   0    3.22    0.64
  -4  -2   0    3.83    0.66
  -4  -2   0    4.11    0.52
  -4  -2   0    3.71    0.75
  -4  -2   0    4.11    0.63
  -4  -2   0    4.48    0.88
   4   2   0    3.66    0.59
   4   2   0    3.56    0.20
   4   2   0    3.01    0.62
   4   2   0    2.32    0.86
   4   2   0    4.07    0.66
   4   2   0    3.62    0.64
  -5  -2   0   -0.28    0.63
  -5  -2   0    0.52    0.69
  -5  -2   0   -0.63    1.01
  -5  -2   0    2.31    0.68
  -5  -2   0    0.35    0.81
  -5  -2   0    1.55    0.58
   5   2   0    0.91    0.70
   5   2   0    0.45    1.00
   5   2   0    2.10    0.77
   5   2   0    2.07    0.76
   5   2   0    0.42    0.53
  -6  -2   0    2.53    0.99
  -6  -2   0    3.73    0.80
  -6  -2   0    4.13    1.12
  -6  -2   0    3.10    0.94
   6   2   0    2.91    1.01
   6   2   0    0.94    0.98
   6   2   0    2.43    1.03
   6   2   0    1.89    0.83
   6   2   0    1.61    1.33
  -7  -2   0    0.58    1.37
  -7  -2   0    0.60    1.17
  -7  -2   0   -0.64    1.10
   7   2   0    0.26    1.62
   7   2   0    0.13    1.30
   7   2   0    1.35    1.35
  -8  -2   0    3.59    2.24
  -8  -2   0    0.70    1.63
  -8  -2   0    2.86    1.58
   8   2   0   -0.09    1.83
   8   2   0    3.92    1.95
   8  -3   0    1.03    2.23
   8  -3   0   -1.68    1.68
  -8   3   0    0.35    1.70
  -8   3   0    1.86    1.59
  -8   3   0    0.62    1.71
   7  -3   0   -0.14    1.22
   7  -3   0   -2.69    1.44
  -7   3   0    3.71    1.28
  -7   3   0   -0.09    1.35
  -7   3   0    1.72    1.23
   6  -3   0    6.98    1.09
   6  -3   0    8.31    1.45
   6  -3   0    6.49    1.20
   6  -3   0    7.87    1.13
  -6   3   0    7.74    1.26
  -6   3   0    7.02    1.16
  -6   3   0    7.99    1.24
   5  -3   0    1.75    0.79
   5  -3   0    3.27    0.75
   5  -3   0    2.73    0.90
   5  -3   0    1.57    0.59
  -5   3   0    2.37    0.87
  -5   3   0    2.44    0.78
  -5   3   0    1.59    1.04
  -5   3   0    2.44    0.35
  -5   3   0    2.31    0.68
   4  -3   0    0.99    0.70
   4  -3   0    0.83    0.44
   4  -3   0    1.50    0.52
   4  -3   0    1.99    0.60
   4  -3   0    0.97    0.45
  -4   3   0    0.99    0.53
  -4   3   0    0.98    0.48
  -4   3   0    1.78    0.67
  -4   3   0    1.22    0.30
  -4   3   0    1.71    0.55
   3  -3   0   36.86    1.21
   3  -3   0   34.90    1.56
   3  -3   0   38.75    1.33
   3  -3   0   37.10    1.47
   3  -3   0   38.27    1.47
   3  -3   0   37.43    1.38
  -3   3   0   37.33    1.36
  -3   3   0   39.17    1.47
  -3   3   0   36.87    1.50
   2  -3   0   54.01    1.40
   2  -3   0   56.34    1.26
   2  -3   0   57.67    1.75
   2  -3   0   54.31    1.62
   2  -3   0   55.17    1.79
   2  -3   0   55.90    1.74
   2  -3   0   57.23    1.64
  -2   3   0   54.60    1.69
  -2   3   0   54.54    1.64
  -2   3   0   48.43    2.13
  -2   3   0   55.82    1.76
   1  -3   0   21.12    0.83
   1  -3   0   21.34    0.65
   1  -3   0   20.76    0.80
   1  -3   0   21.11    0.81
  -1   3   0   21.37    0.82
  -1   3   0   20.44    0.83
  -1   3   0   20.45    0.66
  -1   3   0   20.75    0.76
  -1   3   0   21.50    0.85
  -1   3   0   20.79    0.51
  -1   3   0   21.61    0.82
   0  -3   0    0.15    0.16
   0  -3   0    0.17    0.22
   0  -3   0    0.00    0.19
   0  -3   0    0.15    0.13
   0  -3   0    0.22    0.16
   0   3   0    0.19    0.16
   0   3   0    0.20    0.16
   0   3   0   -0.06    0.14
   0   3   0   -0.05    0.26
   0   3   0    0.23    0.23
  -1  -3   0   23.20    0.99
  -1  -3   0   21.54    0.83
  -1  -3   0   20.67    0.78
  -1  -3   0   19.90    0.69
  -1  -3   0   21.00    0.89
  -1  -3   0   20.89    0.70
  -1  -3   0   22.10    0.83
   1   3   0   20.88    0.79
   1   3   0   20.86    0.98
   1   3   0   21.54    0.84
   1   3   0   21.88    0.87
   1   3   0   20.86    0.75
   1   3   0   20.97    0.69
  -2  -3   0   50.75    1.74
  -2  -3   0   54.29    1.65
  -2  -3   0   52.74    2.12
  -2  -3   0   56.60    1.69
  -2  -3   0   55.06    1.61
  -2  -3   0   56.55    1.74
   2   3   0   54.94    1.92
   2   3   0   56.03    1.67
   2   3   0   53.95    1.70
   2   3   0   55.36    1.64
   2   3   0   57.20    1.67
  -3  -3   0   38.61    1.43
  -3  -3   0   36.90    1.53
  -3  -3   0   35.67    1.43
  -3  -3   0   39.56    1.41
  -3  -3   0   37.14    1.71
  -3  -3   0   36.21    1.40
   3   3   0   38.46    1.47
   3   3   0   37.09    1.43
   3   3   0   35.54    1.68
   3   3   0   38.10    1.41
   3   3   0   37.52    1.46
   3   3   0   39.99    1.50
  -4  -3   0    1.34    0.53
  -4  -3   0    2.31    0.87
  -4  -3   0    1.42    0.57
  -4  -3   0    1.37    0.65
  -4  -3   0    1.56    0.49
  -4  -3   0    1.90    0.53
   4   3   0    2.11    0.92
   4   3   0    1.39    0.50
   4   3   0    1.17    0.55
   4   3   0    1.35    0.56
   4   3   0    1.78    0.58
   4   3   0    1.36    0.58
  -5  -3   0    3.80    0.92
  -5  -3   0    2.27    0.87
  -5  -3   0    2.21    1.18
  -5  -3   0    2.84    0.75
  -5  -3   0    2.16    0.72
  -5  -3   0    2.93    0.71
   5   3   0    2.43    1.02
   5   3   0    1.64    0.63
   5   3   0    0.77    0.90
   5   3   0    2.80    0.80
   5   3   0    3.02    0.89
   5   3   0    3.43    0.88
  -6  -3   0    7.90    1.05
  -6  -3   0    6.58    1.36
  -6  -3   0    7.39    1.14
  -6  -3   0    8.12    1.29
   6   3   0    7.58    1.28
   6   3   0    6.82    1.09
   6   3   0    8.03    1.48
   6   3   0    7.55    1.30
  -7  -3   0    1.73    1.34
  -7  -3   0    0.38    1.42
  -7  -3   0    0.67    1.19
   7   3   0    3.27    1.15
   7   3   0    0.28    1.78
   7   3   0    1.45    1.42
   7   3   0    2.16    1.35
  -8  -3   0    0.36    1.46
  -8  -3   0   -2.52    1.68
  -8  -3   0    1.54    2.00
   8   3   0   -1.59    2.01
   8   3   0   -2.06    1.86
   7  -4   0   -0.63    1.21
   7  -4   0    5.05    1.80
  -7   4   0    1.89    1.44
  -7   4   0    1.78    1.30
  -7   4   0    2.29    1.31
   6  -4   0    1.29    1.01
   6  -4   0   -0.07    0.91
   6  -4   0   -0.11    0.80
   6  -4   0    3.05    1.30
  -6   4   0    0.20    0.97
  -6   4   0    0.54    0.95
  -6   4   0   -0.08    0.39
   5  -4   0    3.94    1.06
   5  -4   0    5.30    0.77
   5  -4   0    5.45    0.94
   5  -4   0    5.10    0.82
  -5   4   0    3.76    1.10
  -5   4   0    3.44    0.85
  -5   4   0    4.46    0.54
   4  -4   0    4.97    0.87
   4  -4   0    5.70    0.60
   4  -4   0    6.30    0.92
   4  -4   0    5.96    0.87
   4  -4   0    5.29    0.73
   4  -4   0    5.96    0.77
  -4   4   0    5.35    0.79
  -4   4   0    5.98    0.85
  -4   4   0    7.25    1.05
  -4   4   0    5.42    0.85
   3  -4   0   15.92    0.96
   3  -4   0   16.45    0.98
   3  -4   0   17.67    1.06
   3  -4   0   14.31    1.00
   3  -4   0   15.94    1.03
   3  -4   0   17.64    0.73
  -3   4   0   17.36    1.06
  -3   4   0   15.64    0.98
  -3   4   0   18.18    1.02
  -3   4   0   15.54    1.04
   2  -4   0  134.04    3.56
   2  -4   0  143.86    3.24
   2  -4   0  142.95    3.19
   2  -4   0  138.89    3.74
   2  -4   0  137.12    3.56
   2  -4   0  140.96    3.71
  -2   4   0  143.88    3.69
  -2   4   0  147.53    3.70
  -2   4   0  137.56    3.71
  -2   4   0  141.22    3.63
   1  -4   0   27.76    1.07
   1  -4   0   26.74    1.10
   1  -4   0   28.44    1.06
   1  -4   0   27.16    0.90
  -1   4   0   27.39    1.15
  -1   4   0   27.44    1.00
  -1   4   0   28.87    1.07
  -1   4   0   28.13    0.67
  -1   4   0   26.76    1.06
  -1   4   0   31.31    1.13
  -1   4   0   27.39    0.90
   0  -4   0    0.08    0.28
   0  -4   0    0.36    0.21
   0  -4   0    0.14    0.25
   0  -4   0    0.37    0.21
   0  -4   0    0.39    0.30
   0   4   0   -0.08    0.17
   0   4   0   -0.11    0.21
   0   4   0   -0.14    0.24
   0   4   0   -0.04    0.29
   0   4   0    0.08    0.26
  -1  -4   0   26.34    1.09
  -1  -4   0   28.49    0.94
  -1  -4   0   30.57    1.28
  -1  -4   0   28.68    1.08
  -1  -4   0   26.96    0.99
   1   4   0   26.85    1.12
   1   4   0   28.02    0.92
   1   4   0   27.57    1.26
   1   4   0   28.82    1.04
   1   4   0   27.25    0.97
   1   4   0   29.60    1.13
  -2  -4   0  139.63    3.75
  -2  -4   0  139.46    3.48
  -2  -4   0  139.79    3.65
  -2  -4   0  136.21    3.88
  -2  -4   0  139.14    3.62
  -2  -4   0  137.21    3.55
  -2  -4   0  136.28    3.41
   2   4   0  139.79    3.56
   2   4   0  142.13    3.61
   2   4   0  142.50    3.69
   2   4   0  145.58    3.72
   2   4   0  136.43    3.90
  -3  -4   0   14.59    0.96
  -3  -4   0   17.42    1.00
  -3  -4   0   15.26    0.93
  -3  -4   0   16.94    1.34
  -3  -4   0   16.70    1.13
  -3  -4   0   15.67    1.09
   3   4   0   16.56    0.96
   3   4   0   16.11    1.00
   3   4   0   15.84    1.26
   3   4   0   16.78    1.03
   3   4   0   18.56    0.99
   3   4   0   15.55    0.98
  -4  -4   0    6.52    0.77
  -4  -4   0    6.66    0.83
  -4  -4   0    6.68    0.74
  -4  -4   0    7.79    1.15
  -4  -4   0    7.74    0.87
  -4  -4   0    6.92    0.93
   4   4   0    6.13    0.79
   4   4   0    6.50    0.83
   4   4   0    6.79    0.89
   4   4   0    6.21    1.09
   4   4   0    6.68    0.81
   4   4   0    6.89    0.89
  -5  -4   0    4.09    0.87
  -5  -4   0    3.99    0.92
  -5  -4   0    3.25    0.99
  -5  -4   0    5.20    0.92
  -5  -4   0    5.44    0.95
   5   4   0    5.10    1.31
   5   4   0    4.70    0.94
   5   4   0    5.11    0.88
   5   4   0    3.83    0.98
   5   4   0    5.24    1.00
  -6  -4   0   -0.59    0.97
  -6  -4   0    0.89    1.09
  -6  -4   0    0.66    0.93
  -6  -4   0    1.75    0.94
   6   4   0    0.45    0.97
   6   4   0    0.09    0.96
   6   4   0   -1.81    1.41
   6   4   0    1.34    1.00
  -7  -4   0    0.72    1.31
  -7  -4   0    2.00    1.60
  -7  -4   0    1.69    1.28
   7   4   0    3.08    2.40
   7   4   0    2.78    2.10
   7   4   0   -0.35    1.32
   7   4   0    5.17    1.66
   7  -5   0    0.97    1.20
   7  -5   0    0.33    1.65
  -7   5   0   -0.28    1.36
  -7   5   0   -2.59    1.27
  -7   5   0    1.73    1.36
   6  -5   0    2.23    1.00
   6  -5   0    1.26    0.88
   6  -5   0    2.07    0.94
   6  -5   0    2.33    1.34
  -6   5   0    1.85    0.98
  -6   5   0    1.25    1.38
   5  -5   0    3.81    0.71
   5  -5   0    3.60    0.89
   5  -5   0    2.33    0.92
   5  -5   0    2.04    0.82
  -5   5   0    3.02    1.12
  -5   5   0    3.83    0.64
  -5   5   0    3.95    0.91
   4  -5   0    1.18    0.75
   4  -5   0    0.47    0.63
   4  -5   0    0.48    0.61
   4  -5   0    0.94    0.61
   4  -5   0    0.42    0.39
   4  -5   0    0.79    0.60
  -4   5   0   -0.44    0.83
  -4   5   0   -0.29    0.55
  -4   5   0    0.35    0.64
  -4   5   0    0.85    0.55
   3  -5   0   21.00    1.33
   3  -5   0   21.36    0.73
   3  -5   0   22.69    1.17
   3  -5   0   21.79    1.24
  -3   5   0   21.07    1.18
  -3   5   0   22.64    1.19
  -3   5   0   22.30    1.28
  -3   5   0   21.82    1.24
   2  -5   0   24.92    1.13
   2  -5   0   23.59    1.19
   2  -5   0   24.79    1.18
   2  -5   0   24.15    0.81
   2  -5   0   22.33    1.10
  -2   5   0   24.40    1.18
  -2   5   0   25.54    1.23
  -2   5   0   23.70    1.13
  -2   5   0   23.80    0.82
  -2   5   0   23.27    1.04
  -2   5   0   24.00    1.16
  -2   5   0   22.78    1.16
   1  -5   0   16.20    0.86
   1  -5   0   15.00    0.86
   1  -5   0   14.28    0.69
   1  -5   0   14.33    0.87
  -1   5   0   16.43    0.79
  -1   5   0   15.07    0.86
  -1   5   0   14.78    0.70
  -1   5   0   16.07    0.96
   0  -5   0    0.26    0.24
   0  -5   0    0.76    0.38
   0  -5   0    0.60    0.31
   0  -5   0    0.41    0.27
   0   5   0    0.64    0.37
   0   5   0    0.63    0.31
   0   5   0    0.24    0.39
   0   5   0    0.09    0.27
  -1  -5   0   14.37    0.75
  -1  -5   0   13.59    0.71
  -1  -5   0   13.46    0.93
  -1  -5   0   13.51    1.00
  -1  -5   0   15.09    0.84
   1   5   0   15.02    0.71
   1   5   0   15.55    0.85
   1   5   0   15.70    0.89
   1   5   0   15.25    1.08
   1   5   0   14.80    0.75
   1   5   0   15.42    0.81
  -2  -5   0   25.46    1.29
  -2  -5   0   22.60    1.11
  -2  -5   0   22.94    0.97
  -2  -5   0   24.48    1.08
  -2  -5   0   23.99    1.14
  -2  -5   0   23.63    1.39
  -2  -5   0   24.15    0.96
   2   5   0   23.75    1.10
   2   5   0   22.11    1.16
   2   5   0   23.03    1.40
   2   5   0   24.25    1.04
   2   5   0   23.28    1.19
  -3  -5   0   22.80    1.01
  -3  -5   0   22.60    1.10
  -3  -5   0   21.01    1.21
  -3  -5   0   22.89    1.23
  -3  -5   0   22.78    1.19
  -3  -5   0   22.51    1.25
  -3  -5   0   21.96    1.55
   3   5   0   22.20    1.58
   3   5   0   23.50    1.28
   3   5   0   22.48    1.16
   3   5   0   22.60    1.28
   3   5   0   23.08    1.16
  -4  -5   0    0.72    0.59
  -4  -5   0    1.56    1.06
  -4  -5   0    0.61    0.60
  -4  -5   0    0.47    0.57
  -4  -5   0    0.16    0.66
  -4  -5   0    0.24    0.55
   4   5   0    0.15    0.52
   4   5   0    0.09    0.61
   4   5   0    0.39    0.54
   4   5   0    1.20    0.64
   4   5   0    0.10    0.90
   4   5   0    1.59    0.69
  -5  -5   0    3.90    0.90
  -5  -5   0    3.22    1.22
  -5  -5   0    3.99    0.87
  -5  -5   0    4.92    0.98
  -5  -5   0    4.86    0.93
   5   5   0    4.05    1.02
   5   5   0    2.20    1.26
   5   5   0    3.45    0.87
  -6  -5   0    0.44    1.16
  -6  -5   0    0.00    0.96
  -6  -5   0    1.23    1.02
   6   5   0    0.69    1.06
   6   5   0    0.41    1.64
   6   5   0    0.41    0.92
   6   5   0    1.98    0.39
   6   5   0    1.61    0.41
   6   5   0    0.69    0.98
  -7  -5   0   -2.48    1.25
  -7  -5   0    1.28    1.62
  -7  -5   0   -2.03    1.27
   7   5   0   -1.36    1.49
   7   5   0    3.71    2.16
   7   5   0   -2.83    1.43
   7   5   0    1.89    1.39
   7  -6   0    0.31    1.84
  -7   6   0    0.12    1.44
  -7   6   0    3.52    1.65
   6  -6   0    1.01    0.87
   6  -6   0    0.09    1.25
   6  -6   0   -0.72    0.96
  -6   6   0    0.02    0.98
  -6   6   0   -0.03    1.03
   5  -6   0    0.85    1.03
   5  -6   0    1.71    0.86
   5  -6   0    1.63    0.57
   5  -6   0    2.91    1.07
   5  -6   0    1.22    0.86
  -5   6   0    1.69    0.85
  -5   6   0    2.66    1.38
  -5   6   0   -0.09    0.91
   4  -6   0    1.25    0.70
   4  -6   0    1.36    0.35
   4  -6   0    0.80    0.66
   4  -6   0    1.53    0.81
   4  -6   0    1.48    0.74
  -4   6   0    1.94    0.75
  -4   6   0    2.72    0.80
  -4   6   0    0.06    0.78
  -4   6   0    1.91    0.75
   3  -6   0    5.42    0.76
   3  -6   0    6.03    0.82
   3  -6   0    5.38    0.78
   3  -6   0    5.27    0.86
   3  -6   0    5.15    0.39
  -3   6   0    5.21    0.88
  -3   6   0    4.99    0.71
  -3   6   0    7.13    0.85
  -3   6   0    5.32    0.83
  -3   6   0    5.40    0.92
  -3   6   0    5.60    0.83
   2  -6   0    4.24    0.65
   2  -6   0    2.98    0.62
   2  -6   0    4.10    0.42
   2  -6   0    3.78    0.61
   2  -6   0    4.39    0.67
  -2   6   0    3.93    0.65
  -2   6   0    4.56    0.62
  -2   6   0    4.79    0.75
  -2   6   0    3.67    0.72
  -2   6   0    4.04    0.53
  -2   6   0    3.77    0.43
  -2   6   0    4.04    0.67
   1  -6   0    2.96    0.40
   1  -6   0    2.92    0.63
   1  -6   0    3.96    0.61
   1  -6   0    3.90    0.59
  -1   6   0    3.39    0.47
  -1   6   0    4.36    0.65
  -1   6   0    3.35    0.50
  -1   6   0    3.42    0.63
  -1   6   0    4.23    0.75
   0  -6   0   18.28    1.11
   0  -6   0   20.02    0.96
   0  -6   0   20.33    1.19
   0  -6   0   18.19    0.91
   0  -6   0   19.76    1.01
   0   6   0   20.57    1.11
   0   6   0   19.40    1.00
   0   6   0   19.79    0.95
   0   6   0   18.93    1.21
   0   6   0   20.68    0.93
  -1  -6   0    4.10    0.73
  -1  -6   0    3.87    0.53
  -1  -6   0    3.43    0.51
  -1  -6   0    3.81    0.52
  -1  -6   0    3.66    0.66
   1   6   0    3.70    0.56
   1   6   0    2.83    0.70
   1   6   0    4.83    0.54
   1   6   0    4.17    0.50
   1   6   0    3.25    0.57
   1   6   0    3.84    0.65
  -2  -6   0    3.75    0.83
  -2  -6   0    4.15    0.48
  -2  -6   0    3.81    0.58
  -2  -6   0    2.33    0.53
  -2  -6   0    3.89    0.67
  -2  -6   0    3.81    0.52
   2   6   0    3.76    0.64
   2   6   0    3.92    0.71
   2   6   0    4.86    0.59
   2   6   0    5.01    0.93
   2   6   0    3.71    0.59
  -3  -6   0    4.56    0.61
  -3  -6   0    5.56    0.87
  -3  -6   0    4.97    0.76
  -3  -6   0    6.53    1.12
  -3  -6   0    5.17    0.71
  -3  -6   0    6.13    0.75
  -3  -6   0    5.25    0.64
   3   6   0    5.53    1.07
   3   6   0    3.63    0.70
   3   6   0    4.96    0.86
   3   6   0    4.46    0.68
   3   6   0    4.34    0.77
  -4  -6   0    0.75    0.64
  -4  -6   0    2.74    0.73
  -4  -6   0    0.33    1.15
  -4  -6   0    0.97    0.81
  -4  -6   0    2.10    0.64
  -4  -6   0    1.22    0.61
  -4  -6   0    1.26    0.69
   4   6   0    0.47    0.65
   4   6   0    0.41    0.67
   4   6   0    1.49    0.78
   4   6   0    1.44    0.90
   4   6   0    0.92    1.07
  -5  -6   0    2.32    0.86
  -5  -6   0    0.15    0.99
  -5  -6   0    1.11    0.95
  -5  -6   0    0.05    0.73
   5   6   0    1.02    0.83
   5   6   0    0.09    1.31
   5   6   0    0.67    0.86
  -6  -6   0    0.15    1.04
  -6  -6   0    0.05    1.07
  -6  -6   0   -1.11    1.23
   6   6   0    0.21    1.59
   6   6   0    0.43    1.00
   6   6   0   -1.26    1.12
   6   6   0    0.76    1.13
  -7  -6   0    0.06    1.41
  -7  -6   0    3.02    1.68
  -7  -6   0    1.82    1.82
   7   6   0    1.66    1.38
   7   6   0    1.23    2.12
   7   6   0    1.27    1.43
   7   6   0    0.23    1.63
   7  -7   0    1.76    2.07
  -7   7   0   -0.45    1.66
  -7   7   0   -2.38    1.66
   6  -7   0   -0.26    1.25
   6  -7   0   -1.43    1.42
  -6   7   0    0.73    1.14
  -6   7   0   -0.77    1.20
   5  -7   0    0.51    0.93
   5  -7   0   -0.47    0.88
   5  -7   0    0.92    1.12
   5  -7   0    1.15    0.93
  -5   7   0   -0.35    0.93
  -5   7   0    1.82    1.09
   4  -7   0   -0.84    0.70
   4  -7   0   -1.16    0.78
   4  -7   0    0.38    0.83
   4  -7   0   -0.58    0.80
  -4   7   0   -1.45    0.91
  -4   7   0    0.20    0.72
  -4   7   0   -0.41    0.78
   3  -7   0    2.49    0.73
   3  -7   0    2.59    0.35
   3  -7   0    2.05    0.79
   3  -7   0    1.77    0.75
   3  -7   0    3.57    0.74
  -3   7   0    4.21    0.84
  -3   7   0    2.28    0.81
  -3   7   0    2.18    0.65
  -3   7   0    3.60    0.89
  -3   7   0    3.14    0.94
  -3   7   0    2.74    0.73
   2  -7   0    9.46    1.01
   2  -7   0    8.18    0.95
   2  -7   0    8.63    0.89
   2  -7   0    9.75    1.03
   2  -7   0    9.75    0.72
  -2   7   0    9.83    0.93
  -2   7   0    9.30    1.03
  -2   7   0   10.11    1.02
  -2   7   0   10.42    1.01
  -2   7   0   10.65    1.12
  -2   7   0   10.51    1.09
  -2   7   0    9.98    0.73
   1  -7   0   -0.05    0.48
   1  -7   0    0.42    0.56
   1  -7   0    0.11    0.35
   1  -7   0    0.49    0.50
  -1   7   0    0.31    0.44
  -1   7   0   -0.46    0.60
  -1   7   0   -0.15    0.57
  -1   7   0    0.62    0.62
  -1   7   0    0.16    0.35
   0  -7   0    0.38    0.70
   0  -7   0    0.98    0.60
   0  -7   0    1.07    0.46
   0  -7   0   -0.21    0.36
   0  -7   0    0.40    0.48
   0  -7   0    0.72    0.42
   0   7   0    0.74    0.44
   0   7   0   -0.11    0.53
   0   7   0    1.09    0.52
   0   7   0    1.20    0.67
   0   7   0    0.32    0.39
  -1  -7   0   -0.96    0.41
  -1  -7   0   -0.34    0.40
  -1  -7   0    1.51    0.68
  -1  -7   0   -0.28    0.36
  -1  -7   0    0.09    0.58
   1   7   0   -0.07    0.40
   1   7   0   -0.06    0.43
   1   7   0    0.23    0.67
   1   7   0   -0.57    0.55
   1   7   0   -0.23    0.42
   1   7   0    0.07    0.43
  -2  -7   0    8.64    0.96
  -2  -7   0    9.89    1.19
  -2  -7   0   10.88    0.87
  -2  -7   0   10.74    1.12
  -2  -7   0   11.76    0.89
  -2  -7   0    9.23    0.74
   2   7   0   10.22    0.90
   2   7   0   13.49    1.14
   2   7   0    8.64    0.95
   2   7   0    9.68    1.24
   2   7   0   10.12    1.03
  -3  -7   0    3.74    0.75
  -3  -7   0    2.06    0.83
  -3  -7   0    2.29    0.56
  -3  -7   0    1.67    0.62
  -3  -7   0    2.35    0.55
  -3  -7   0    4.87    1.17
   3   7   0    1.77    0.67
   3   7   0    2.65    0.88
   3   7   0    2.36    1.03
   3   7   0    1.66    0.66
   3   7   0    3.49    0.78
  -4  -7   0    0.67    0.61
  -4  -7   0    0.89    0.94
  -4  -7   0   -1.27    0.59
  -4  -7   0   -0.36    0.69
  -4  -7   0   -0.50    0.61
   4   7   0   -0.61    0.70
   4   7   0   -0.25    0.84
   4   7   0   -0.48    1.09
  -5  -7   0   -0.21    0.83
  -5  -7   0    0.29    0.88
  -5  -7   0   -0.69    0.82
  -5  -7   0    0.02    0.76
  -5  -7   0    0.60    0.92
   5   7   0    0.61    0.96
   5   7   0   -0.29    0.96
   5   7   0    0.15    1.45
  -6  -7   0   -0.27    1.46
  -6  -7   0   -1.43    1.01
  -6  -7   0   -0.29    1.16
  -6  -7   0    0.36    1.11
   6   7   0    0.82    2.14
   6   7   0    1.15    1.21
   6   7   0   -2.35    1.17
  -7  -7   0   -0.34    1.45
  -7  -7   0    1.50    1.52
  -7  -7   0    2.89    1.99
   7   7   0   -1.21    2.44
   7   7   0    0.53    1.50
   7   7   0    0.37    1.68
   7  -8   0   -1.02    2.63
   6  -8   0    0.26    1.68
   6  -8   0    1.77    1.43
  -6   8   0    1.49    1.42
  -6   8   0   -1.07    1.41
   5  -8   0    0.73    1.01
   5  -8   0    1.81    1.14
   5  -8   0    0.84    0.97
   5  -8   0    3.35    1.33
  -5   8   0    1.53    1.23
  -5   8   0   -0.24    0.94
   4  -8   0   -0.48    0.87
   4  -8   0   -0.93    0.91
   4  -8   0   -1.50    0.90
   4  -8   0   -0.61    1.01
  -4   8   0    0.95    0.87
  -4   8   0    1.12    1.23
  -4   8   0    0.19    0.88
   3  -8   0    1.96    0.84
   3  -8   0    0.96    0.81
   3  -8   0    1.18    0.82
   3  -8   0    1.34    0.39
   3  -8   0    0.97    0.78
  -3   8   0    2.54    1.01
  -3   8   0    1.02    0.87
  -3   8   0    1.47    0.75
   2  -8   0    1.96    0.65
   2  -8   0    2.91    0.78
   2  -8   0    3.08    0.55
   2  -8   0    3.90    0.75
   2  -8   0    3.79    0.88
  -2   8   0    3.23    0.89
  -2   8   0    2.63    0.54
  -2   8   0    1.71    0.66
  -2   8   0    3.20    0.96
  -2   8   0    2.07    0.88
  -2   8   0    3.24    0.73
   1  -8   0    5.91    0.87
   1  -8   0    6.91    0.76
   1  -8   0    4.37    1.02
   1  -8   0    5.25    0.80
  -1   8   0    4.59    0.85
  -1   8   0    5.19    0.72
  -1   8   0    4.85    0.98
  -1   8   0    6.10    0.78
  -1   8   0    7.02    1.03
  -1   8   0    6.13    0.41
   0  -8   0   13.54    1.14
   0  -8   0   16.99    1.43
   0  -8   0   13.45    0.98
   0  -8   0   11.71    1.23
   0  -8   0   13.60    1.01
   0   8   0   13.79    1.01
   0   8   0   15.22    1.04
   0   8   0   14.45    1.43
   0   8   0   13.15    1.19
   0   8   0   13.99    1.07
  -1  -8   0    4.93    0.70
  -1  -8   0    4.90    0.73
  -1  -8   0    5.71    0.75
  -1  -8   0    5.98    1.08
  -1  -8   0    6.22    1.04
   1   8   0    5.95    1.09
   1   8   0    5.94    0.76
   1   8   0    5.65    0.82
   1   8   0    4.78    0.75
   1   8   0    5.55    0.93
   1   8   0    6.98    0.87
  -2  -8   0    2.98    0.55
  -2  -8   0    2.54    0.69
  -2  -8   0    2.32    0.85
  -2  -8   0    2.79    1.05
  -2  -8   0    4.01    0.66
  -2  -8   0    3.38    0.68
   2   8   0    2.00    0.68
   2   8   0    2.42    1.02
   2   8   0    3.05    0.67
   2   8   0    3.29    0.75
   2   8   0    3.49    0.87
  -3  -8   0    0.68    0.70
  -3  -8   0    1.64    0.62
  -3  -8   0    1.68    0.58
  -3  -8   0    0.47    0.79
   3   8   0    1.19    1.09
   3   8   0    0.71    0.73
   3   8   0    0.54    0.67
   3   8   0    1.70    0.76
  -4  -8   0   -0.06    0.98
  -4  -8   0    1.00    0.73
  -4  -8   0    0.35    0.77
  -4  -8   0   -0.15    0.68
   4   8   0    2.03    0.87
   4   8   0    0.31    1.45
  -5  -8   0    2.67    1.08
  -5  -8   0    2.07    1.39
  -5  -8   0    3.92    0.96
  -5  -8   0   -0.07    1.02
  -5  -8   0    1.80    1.14
   5   8   0    0.10    1.03
   5   8   0    2.28    1.12
   5   8   0    0.94    1.59
  -6  -8   0    2.53    1.34
  -6  -8   0    0.78    1.68
  -6  -8   0    0.40    1.12
  -6  -8   0    1.77    1.41
   6   8   0    2.06    1.42
   6   8   0   -0.67    1.33
   6   8   0    1.67    2.13
  -7  -8   0    0.44    1.84
   7   8   0   -1.59    2.97
   6  -9   0    1.62    1.87
   6  -9   0    2.75    1.64
  -6   9   0   -4.67    1.46
  -6   9   0   -0.15    1.49
   5  -9   0    5.37    1.66
   5  -9   0    3.75    1.32
  -5   9   0    4.22    1.35
  -5   9   0    7.03    1.49
   4  -9   0    0.10    1.12
   4  -9   0    1.94    1.02
   4  -9   0    1.08    1.03
   4  -9   0    3.10    1.15
   4  -9   0    1.99    0.30
  -4   9   0    1.58    1.27
  -4   9   0    3.10    1.13
   3  -9   0    3.97    1.14
   3  -9   0    2.30    0.94
   3  -9   0    1.64    0.98
   3  -9   0    3.59    1.09
   3  -9   0    2.98    0.57
  -3   9   0    2.78    0.94
  -3   9   0    3.03    1.26
  -3   9   0    2.18    1.08
   2  -9   0    0.51    0.77
   2  -9   0    0.88    0.77
   2  -9   0    0.74    0.56
   2  -9   0   -2.04    0.92
   2  -9   0    0.28    0.75
  -2   9   0    0.03    0.73
  -2   9   0    0.29    0.79
  -2   9   0    0.66    0.56
  -2   9   0   -0.53    0.94
  -2   9   0    0.31    1.10
  -2   9   0    1.32    1.00
   1  -9   0    1.14    0.56
   1  -9   0    2.54    0.87
   1  -9   0    1.47    1.01
   1  -9   0    1.93    0.75
  -1   9   0    1.11    0.64
  -1   9   0    2.04    0.70
  -1   9   0    2.33    0.92
  -1   9   0    1.30    0.27
  -1   9   0    2.43    1.01
  -1   9   0    2.76    0.95
   0  -9   0   -0.61    0.82
   0  -9   0    0.79    1.03
   0  -9   0    0.74    0.57
   0  -9   0    0.24    0.63
   0  -9   0   -0.37    0.60
   0   9   0   -0.03    0.70
   0   9   0    0.24    0.65
   0   9   0    0.30    0.59
   0   9   0    0.48    0.82
   0   9   0    0.25    0.80
  -1  -9   0    2.14    0.86
  -1  -9   0    2.05    0.66
  -1  -9   0    2.11    0.74
  -1  -9   0    2.10    0.70
  -1  -9   0    2.91    1.15
   1   9   0    2.16    0.72
   1   9   0    1.70    0.86
   1   9   0    2.24    0.86
   1   9   0    1.92    0.77
   1   9   0    2.19    0.71
   1   9   0    2.65    0.74
  -2  -9   0    0.67    0.91
  -2  -9   0    1.45    0.64
  -2  -9   0    0.73    0.63
   2   9   0    2.09    0.79
   2   9   0    0.13    1.11
   2   9   0    0.86    0.80
   2   9   0    1.46    0.79
  -3  -9   0    3.76    1.27
  -3  -9   0    2.61    0.68
  -3  -9   0    3.28    0.77
  -3  -9   0    3.18    0.85
   3   9   0    4.10    1.43
   3   9   0    2.83    1.00
  -4  -9   0    2.24    0.84
  -4  -9   0    1.68    0.98
  -4  -9   0    2.25    1.24
  -4  -9   0    3.79    0.89
   4   9   0    1.18    1.05
   4   9   0    1.11    0.99
   4   9   0   -0.06    1.54
  -5  -9   0    3.51    1.52
  -5  -9   0    3.35    1.25
  -5  -9   0    4.38    1.11
   5   9   0    3.29    2.27
   5   9   0    5.29    1.51
   5   9   0    3.66    1.29
  -6  -9   0   -1.10    1.69
  -6  -9   0    1.17    1.56
  -6  -9   0   -1.18    1.45
   6   9   0    0.44    1.73
   6   9   0   -0.94    1.50
   6   9   0   -0.79    2.29
   6 -10   0    4.70    1.85
   6 -10   0    1.62    2.01
  -6  10   0    1.74    1.87
  -6  10   0    2.44    1.91
   5 -10   0    0.27    1.63
   5 -10   0    0.23    1.44
  -5  10   0    1.84    1.35
  -5  10   0   -1.79    1.44
   4 -10   0   -0.60    1.13
   4 -10   0   -0.52    1.26
   4 -10   0    0.39    1.13
   4 -10   0    1.85    2.12
  -4  10   0    0.70    1.21
  -4  10   0   -0.67    1.21
   3 -10   0    6.43    1.24
   3 -10   0   10.15    1.52
   3 -10   0    7.53    1.38
   3 -10   0    6.30    1.16
   3 -10   0    7.89    0.83
  -3  10   0    8.55    1.35
  -3  10   0    4.78    2.55
   2 -10   0    3.55    1.07
   2 -10   0    4.11    0.89
   2 -10   0    3.74    1.12
   2 -10   0    4.21    0.82
   2 -10   0    4.74    1.37
  -2  10   0    4.05    0.81
  -2  10   0    1.63    0.91
  -2  10   0    3.79    1.10
   1 -10   0    2.44    1.01
   1 -10   0    1.22    0.86
   1 -10   0    0.49    0.74
   1 -10   0    1.09    1.26
  -1  10   0    0.31    1.00
  -1  10   0    1.66    0.97
  -1  10   0    0.21    0.75
  -1  10   0    1.16    0.30
   0 -10   0    7.21    0.95
   0 -10   0    6.49    1.14
   0 -10   0    6.29    1.12
   0 -10   0    5.89    1.53
   0 -10   0    7.63    0.98
   0  10   0    5.97    0.95
   0  10   0    6.22    1.41
   0  10   0    4.84    0.97
   0  10   0    6.71    1.05
   0  10   0    6.00    0.66
  -1 -10   0    1.47    1.09
  -1 -10   0    2.55    0.76
  -1 -10   0    1.99    0.77
   1  10   0    0.48    0.78
   1  10   0    0.13    0.82
   1  10   0    1.97    0.85
   1  10   0    0.84    1.24
  -2 -10   0    3.61    0.90
  -2 -10   0    2.69    1.20
  -2 -10   0    3.42    0.67
  -2 -10   0    5.23    0.95
   2  10   0    1.23    1.34
   2  10   0    3.79    1.05
  -3 -10   0    5.98    0.88
  -3 -10   0    9.17    1.10
  -3 -10   0    6.88    1.47
  -3 -10   0    7.47    1.37
   3  10   0    8.98    1.52
   3  10   0    6.32    1.13
   3  10   0    5.85    1.18
  -4 -10   0   -0.22    1.36
  -4 -10   0   -0.09    0.92
  -4 -10   0   -0.58    1.02
   4  10   0    0.94    1.07
   4  10   0   -0.28    1.71
   4  10   0   -1.73    1.10
  -5 -10   0    0.16    1.18
  -5 -10   0   -4.12    1.59
  -5 -10   0   -0.13    1.11
   5  10   0    0.76    1.41
   5  10   0   -0.60    1.41
   5  10   0   -2.42    2.18
  -6 -10   0    5.04    2.23
  -6 -10   0    2.09    1.59
   6  10   0    0.70    2.71
   6  10   0    0.32    1.77
   6  10   0    1.12    1.82
   5 -11   0    1.01    1.55
   5 -11   0    3.88    1.83
  -5  11   0    1.48    1.69
  -5  11   0    1.72    2.02
   4 -11   0    2.23    1.39
   4 -11   0    0.34    1.32
  -4  11   0    1.49    1.31
  -4  11   0   -0.19    1.37
   3 -11   0    3.00    1.22
   3 -11   0    0.50    1.33
   3 -11   0    2.91    1.56
   3 -11   0    2.97    0.86
   3 -11   0   -0.15    1.31
  -3  11   0    3.19    1.53
  -3  11   0    2.43    1.21
   2 -11   0   -0.75    0.91
   2 -11   0    0.94    1.17
   2 -11   0   -0.63    0.94
   2 -11   0    0.50    1.58
   2 -11   0    0.31    0.85
  -2  11   0    0.60    0.79
  -2  11   0   -1.05    0.94
  -2  11   0    1.98    1.44
   1 -11   0    1.68    1.07
   1 -11   0    4.39    1.62
   1 -11   0    1.25    0.99
   1 -11   0    3.11    1.07
  -1  11   0    0.43    0.92
  -1  11   0    1.41    0.33
  -1  11   0    0.49    1.35
   0 -11   0    0.50    1.24
   0 -11   0   -1.13    0.90
   0 -11   0   -1.39    0.69
   0  11   0   -1.82    1.03
   0  11   0   -0.46    0.55
   0  11   0   -0.77    1.29
   0  11   0   -0.51    0.86
  -1 -11   0    0.70    0.90
  -1 -11   0   -0.49    1.15
  -1 -11   0    1.60    1.16
   1  11   0    1.90    0.71
   1  11   0    0.99    1.04
   1  11   0    0.32    0.90
   1  11   0    4.99    1.46
  -2 -11   0    0.56    0.88
  -2 -11   0   -0.93    0.69
  -2 -11   0   -0.43    0.80
  -2 -11   0   -0.63    1.31
   2  11   0    0.82    0.89
   2  11   0   -0.91    0.96
   2  11   0    0.25    1.49
  -3 -11   0    1.80    1.01
  -3 -11   0    1.81    1.10
  -3 -11   0    2.22    1.51
   3  11   0    3.64    1.85
   3  11   0    1.14    1.05
   3  11   0    0.55    1.11
  -4 -11   0   -1.79    1.02
  -4 -11   0    0.34    1.58
  -4 -11   0    1.83    1.13
   4  11   0   -1.00    1.97
   4  11   0    0.03    1.43
   4  11   0   -1.32    1.33
  -5 -11   0    3.39    1.42
  -5 -11   0    4.81    2.09
   5  11   0    1.42    1.75
   5  11   0    3.56    1.73
   5  11   0    2.89    2.58
   4 -12   0    0.25    1.68
   4 -12   0    2.62    1.72
  -4  12   0    0.45    1.59
  -4  12   0   -1.90    1.96
   3 -12   0    0.47    1.51
   3 -12   0   -0.17    1.27
   3 -12   0    1.35    1.41
  -3  12   0   -0.08    1.31
  -3  12   0    0.42    1.62
   2 -12   0   -0.03    1.09
   2 -12   0   -0.40    1.35
   2 -12   0   -1.43    1.06
   2 -12   0    0.60    1.26
  -2  12   0   -1.72    1.20
  -2  12   0    4.26    1.81
   1 -12   0    2.17    1.31
   1 -12   0    0.88    0.91
   1 -12   0    1.78    1.37
  -1  12   0    1.59    1.55
  -1  12   0    1.09    0.32
  -1  12   0    1.76    1.07
   0 -12   0    3.14    1.34
   0 -12   0    1.63    1.56
   0 -12   0    6.49    1.19
   0  12   0    5.34    1.23
   0  12   0    5.01    1.72
   0  12   0    5.87    0.83
  -1 -12   0    0.67    1.56
  -1 -12   0   -0.73    0.88
  -1 -12   0    0.27    1.13
   1  12   0   -1.25    1.60
   1  12   0    1.24    0.83
   1  12   0   -0.26    1.21
   1  12   0    1.05    1.14
  -2 -12   0   -2.65    1.59
  -2 -12   0    1.62    1.05
  -2 -12   0    2.38    1.09
   2  12   0   -0.25    1.13
   2  12   0    0.08    1.71
   2  12   0   -1.45    1.01
  -3 -12   0   -1.37    1.10
  -3 -12   0   -0.34    1.25
  -3 -12   0    0.65    1.75
   3  12   0    1.20    2.12
   3  12   0    0.07    1.27
   3  12   0   -1.14    1.28
  -4 -12   0    1.19    1.25
  -4 -12   0    1.70    2.06
   4  12   0   -0.53    2.53
   4  12   0   -0.10    1.60
   4  12   0    3.54    1.63
   4 -13   0    3.00    1.95
   4 -13   0   -0.70    1.88
  -4  13   0   -3.86    2.28
  -4  13   0    3.00    2.06
   3 -13   0   -3.94    1.38
   3 -13   0    0.85    1.84
  -3  13   0    0.06    1.53
  -3  13   0    2.11    1.89
   2 -13   0    2.86    2.72
   2 -13   0    3.60    1.72
   2 -13   0    5.17    1.54
  -2  13   0    2.38    2.06
  -2  13   0    0.25    1.53
   1 -13   0    1.80    1.11
   1 -13   0    0.91    1.53
  -1  13   0    0.53    1.70
  -1  13   0    1.14    1.21
   0 -13   0   -1.08    1.45
   0 -13   0   -1.86    1.68
   0 -13   0    1.14    1.15
   0  13   0   -0.09    1.19
   0  13   0   -0.94    0.84
   0  13   0   -0.17    1.92
  -1 -13   0   -0.07    1.54
  -1 -13   0    0.59    1.22
  -1 -13   0   -2.03    1.85
   1  13   0    2.82    1.92
   1  13   0    0.93    1.41
   1  13   0    0.83    1.03
  -2 -13   0    2.45    1.32
  -2 -13   0   10.01    2.16
   2  13   0    1.76    1.37
   2  13   0    3.98    1.51
   2  13   0    3.98    2.25
  -3 -13   0   -0.15    2.09
  -3 -13   0    0.99    1.50
   3  13   0    0.77    1.51
   3  13   0    1.14    2.61
   3  13   0   -1.98    1.39
  -4 -13   0    1.03    2.38
  -4 -13   0   -1.03    1.57
   4  13   0    2.49    3.21
   4  13   0   -2.13    1.61
   2 -14   0    0.57    1.52
   2 -14   0    3.43    1.86
  -2  14   0   -0.29    2.17
  -2  14   0   -1.18    1.66
   1 -14   0    2.59    1.67
   1 -14   0    4.43    2.05
   1 -14   0    1.08    1.42
  -1  14   0   -1.00    2.34
  -1  14   0    0.34    1.38
   0 -14   0    1.74    2.07
   0 -14   0    1.16    1.83
   0  14   0    3.79    2.34
   0  14   0    3.39    1.69
  -1 -14   0    1.56    2.18
  -1 -14   0   -0.63    1.22
  -1 -14   0   -1.41    1.83
   1  14   0   -0.72    1.55
   1  14   0    0.75    2.42
  -2 -14   0   -3.35    2.40
  -2 -14   0    0.89    1.91
  -2 -14   0   -0.59    1.58
   2  14   0   -1.09    1.71
   2  14   0    0.56    2.47
   2  14   0    0.10    1.36
   2  14  -1    9.59    2.73
   2  14  -1    0.34    1.37
   2  14  -1    4.43    1.78
  -2 -14   1   -1.70    2.17
  -2 -14   1    1.10    1.65
  -2 -14   1    1.53    1.84
   1  14  -1    3.33    1.84
   1  14  -1    1.74    2.55
  -1 -14   1    0.12    1.80
  -1 -14   1    0.82    1.38
  -1 -14   1    1.61    1.83
   0  14  -1    1.04    1.48
   0  14  -1   -1.97    2.17
   0 -14   1    2.09    2.17
   0 -14   1    2.77    1.83
   0 -14   1    0.56    1.31
  -1  14  -1    6.73    2.33
   1 -14   1    2.81    2.04
   1 -14   1    1.18    1.39
   1 -14   1    0.23    1.68
  -2  14  -1    6.22    1.79
  -2  14  -1   -4.23    2.32
   2 -14   1    0.13    2.15
   2 -14   1    3.22    1.93
   2 -14   1    1.39    1.53
   4  13  -1   -0.78    1.81
   4  13  -1    1.11    2.63
  -4 -13   1   -0.43    1.70
  -4 -13   1   -1.59    2.37
   3  13  -1    1.17    1.49
   3  13  -1   -6.16    2.23
   3  13  -1   -0.93    1.49
  -3 -13   1    0.79    2.12
  -3 -13   1    1.22    1.41
   2  13  -1    6.36    2.32
   2  13  -1   -0.40    1.30
   2  13  -1    2.13    1.24
  -2 -13   1    2.48    1.26
  -2 -13   1    2.47    1.89
   1  13  -1    3.63    1.06
   1  13  -1    6.73    1.66
   1  13  -1    2.98    2.11
  -1 -13   1    7.25    1.51
  -1 -13   1    8.27    1.76
  -1 -13   1    3.13    1.82
   0  13  -1   -1.19    1.81
   0  13  -1   -0.98    1.16
   0 -13   1    0.26    1.38
   0 -13   1    1.93    1.61
   0 -13   1    1.77    1.24
  -1  13  -1    1.28    1.80
   1 -13   1    2.39    1.12
   1 -13   1    0.61    1.47
   1 -13   1    1.58    1.55
  -2  13  -1    1.58    1.78
  -2  13  -1    0.35    1.41
   2 -13   1    1.65    1.53
   2 -13   1    1.68    1.33
   2 -13   1   -0.49    1.95
  -3  13  -1    1.06    1.65
  -3  13  -1   -1.90    1.87
   3 -13   1    1.22    1.86
   3 -13   1    0.17    1.69
   3 -13   1    1.47    1.76
  -4  13  -1    1.18    2.14
  -4  13  -1    2.70    1.92
   4 -13   1    2.60    1.87
   4 -13   1   -4.61    1.92
   4  12  -1    0.68    1.50
   4  12  -1    0.35    1.55
   4  12  -1    2.13    2.48
  -4 -12   1    0.23    1.22
  -4 -12   1    3.03    2.10
   3  12  -1    0.96    2.01
   3  12  -1   -0.24    1.41
   3  12  -1   -0.03    1.27
  -3 -12   1   -2.44    1.13
  -3 -12   1    0.54    1.75
   2  12  -1   -1.25    1.11
   2  12  -1    0.08    1.05
   2  12  -1    0.30    1.83
  -2 -12   1    0.63    1.06
  -2 -12   1   -1.43    1.68
   1  12  -1    0.44    1.20
   1  12  -1   -0.77    0.81
   1  12  -1    1.14    1.52
   1  12  -1   -1.19    1.17
  -1 -12   1    0.40    1.14
  -1 -12   1    1.95    0.98
  -1 -12   1   -0.47    1.47
   0  12  -1    3.14    0.74
   0  12  -1    4.14    1.14
   0  12  -1    5.53    1.78
   0  12  -1    3.38    1.38
   0 -12   1    2.34    1.60
   0 -12   1    1.44    1.25
   0 -12   1    2.99    1.05
  -1  12  -1    5.86    1.16
  -1  12  -1    4.49    1.63
   1 -12   1    5.63    1.37
   1 -12   1    7.98    1.65
  -2  12  -1    4.85    1.40
  -2  12  -1    5.42    1.90
   2 -12   1    3.14    1.19
   2 -12   1    4.90    1.65
   2 -12   1    3.92    1.21
   2 -12   1    6.23    1.48
  -3  12  -1    1.34    1.39
  -3  12  -1   -1.94    1.79
   3 -12   1   -1.48    1.40
   3 -12   1    1.87    1.51
   3 -12   1   -0.04    1.32
  -4  12  -1    2.97    1.70
  -4  12  -1   -0.86    1.81
   4 -12   1    2.53    1.69
   4 -12   1   -2.93    1.46
   5  11  -1   -0.20    1.62
   5  11  -1   -1.36    1.61
   5  11  -1    2.18    2.53
  -5 -11   1   -0.95    1.48
  -5 -11   1    1.91    1.96
   4  11  -1   -0.38    1.43
   4  11  -1    1.17    1.99
   4  11  -1   -0.22    1.22
  -4 -11   1    0.06    0.99
  -4 -11   1   -2.46    1.57
  -4 -11   1   -1.37    1.08
   3  11  -1   -1.02    1.02
   3  11  -1   -0.12    1.14
   3  11  -1   -0.73    1.74
  -3 -11   1    0.32    1.00
  -3 -11   1    0.38    1.44
  -3 -11   1   -0.50    0.90
  -3 -11   1    1.08    1.29
   2  11  -1    4.77    1.23
   2  11  -1    3.67    1.58
   2  11  -1    1.45    0.93
  -2 -11   1    4.14    0.86
  -2 -11   1    5.34    1.48
  -2 -11   1    3.33    0.98
   1  11  -1    0.88    1.37
   1  11  -1    0.58    0.96
   1  11  -1    1.41    0.95
   1  11  -1    0.77    0.75
  -1 -11   1   -0.73    1.36
  -1 -11   1    0.80    0.88
   0  11  -1    0.40    0.83
   0  11  -1    0.06    0.98
   0  11  -1   -0.13    0.54
   0  11  -1    1.20    1.17
   0 -11   1    0.01    0.80
   0 -11   1   -0.88    1.03
   0 -11   1   -0.97    1.05
  -1  11  -1    5.31    1.08
  -1  11  -1    4.10    2.11
  -1  11  -1    4.04    0.34
  -1  11  -1    4.70    1.39
   1 -11   1    6.49    1.26
   1 -11   1    4.80    1.05
   1 -11   1    4.68    1.23
  -2  11  -1    7.30    1.55
  -2  11  -1    4.23    1.17
   2 -11   1    5.15    1.29
   2 -11   1    8.19    1.90
   2 -11   1    8.60    1.46
   2 -11   1    6.93    1.08
   2 -11   1    5.91    1.03
  -3  11  -1   -0.09    1.13
  -3  11  -1    0.47    1.34
   3 -11   1   -0.92    1.15
   3 -11   1    1.41    1.66
   3 -11   1    0.12    0.87
   3 -11   1    1.01    1.24
   3 -11   1   -0.97    1.30
  -4  11  -1   -0.06    1.81
  -4  11  -1    1.61    1.41
   4 -11   1    1.61    1.38
   4 -11   1   -0.24    1.29
   4 -11   1   -3.09    1.41
  -5  11  -1   -2.46    1.91
  -5  11  -1    0.53    1.73
   5 -11   1   -4.61    1.50
   5 -11   1    4.17    1.85
   6  10  -1   -0.06    1.70
   6  10  -1   -2.14    2.86
   6  10  -1   -0.88    1.90
  -6 -10   1    1.37    1.59
  -6 -10   1    4.70    2.29
   5  10  -1    1.97    2.15
   5  10  -1    1.03    1.50
   5  10  -1   -2.48    1.29
  -5 -10   1    1.81    1.61
  -5 -10   1    0.65    1.28
   4  10  -1    0.16    1.18
   4  10  -1    1.66    1.81
   4  10  -1   -0.95    0.95
  -4 -10   1    1.89    1.34
  -4 -10   1   -0.08    1.01
  -4 -10   1   -0.58    0.97
  -4 -10   1    3.16    0.91
   3  10  -1    2.42    1.65
   3  10  -1    0.57    0.93
   3  10  -1    1.32    0.93
  -3 -10   1    1.89    0.84
  -3 -10   1    3.91    0.89
  -3 -10   1    2.14    0.76
  -3 -10   1   -0.57    1.16
   2  10  -1    4.10    1.05
   2  10  -1    3.53    1.44
   2  10  -1    4.46    0.90
  -2 -10   1    5.12    0.89
  -2 -10   1    4.55    0.99
  -2 -10   1    5.92    0.83
   1  10  -1    2.59    0.82
   1  10  -1    2.09    0.62
   1  10  -1    0.37    1.22
   1  10  -1    1.55    0.79
  -1 -10   1    1.74    1.08
  -1 -10   1    2.28    0.77
   0  10  -1    1.90    0.84
   0  10  -1    0.44    1.08
   0  10  -1    1.69    0.54
   0  10  -1    1.12    0.77
   0 -10   1    1.74    0.80
   0 -10   1    1.82    0.74
   0 -10   1    2.83    0.94
   0 -10   1    2.11    1.42
   0 -10   1    2.47    1.00
  -1  10  -1    6.37    1.27
  -1  10  -1    6.42    1.23
  -1  10  -1    5.44    0.89
  -1  10  -1    5.22    0.41
   1 -10   1    7.63    1.12
   1 -10   1    7.60    1.28
   1 -10   1    6.63    1.38
   1 -10   1    6.59    0.92
  -2  10  -1    7.60    1.24
  -2  10  -1    8.99    1.40
   2 -10   1   11.19    1.60
   2 -10   1   10.78    1.26
   2 -10   1   13.74    1.53
   2 -10   1    9.36    0.99
  -3  10  -1   -0.24    1.06
  -3  10  -1    0.58    0.97
   3 -10   1    0.00    1.02
   3 -10   1   -0.03    0.60
   3 -10   1    1.66    1.40
   3 -10   1   -0.21    1.10
   3 -10   1    0.86    0.97
  -4  10  -1    4.21    1.24
  -4  10  -1    5.12    1.45
   4 -10   1    5.89    1.60
   4 -10   1    4.99    1.39
   4 -10   1    4.74    1.24
   4 -10   1    3.62    1.31
  -5  10  -1   -0.49    1.36
  -5  10  -1   -0.06    1.57
   5 -10   1    2.06    1.70
   5 -10   1   -0.36    1.31
  -6  10  -1   -2.62    1.60
  -6  10  -1    0.35    1.71
   6 -10   1    2.96    1.84
   6 -10   1    0.34    1.91
   6   9  -1   -0.33    1.46
   6   9  -1    0.78    1.51
   6   9  -1    2.63    2.29
  -6  -9   1   -0.63    1.46
  -6  -9   1    1.27    1.92
  -6  -9   1    2.23    1.58
   5   9  -1    0.01    1.34
   5   9  -1   -1.36    1.80
   5   9  -1    0.03    1.23
  -5  -9   1    2.26    1.45
  -5  -9   1    0.68    1.10
  -5  -9   1    0.28    0.88
   4   9  -1    4.46    1.17
   4   9  -1    5.25    1.07
   4   9  -1    3.78    1.66
  -4  -9   1    4.52    0.86
  -4  -9   1    6.05    1.13
  -4  -9   1    3.42    0.98
  -4  -9   1    2.72    1.29
   3   9  -1    8.04    1.13
   3   9  -1    6.76    1.16
   3   9  -1    7.77    1.92
  -3  -9   1   11.77    1.21
  -3  -9   1    9.73    1.05
  -3  -9   1   10.30    1.42
  -3  -9   1   12.75    1.27
   2   9  -1    4.30    0.76
   2   9  -1    3.42    0.85
   2   9  -1    5.76    1.16
   2   9  -1    3.04    0.74
   2   9  -1    5.33    0.91
  -2  -9   1    5.25    1.13
  -2  -9   1    5.57    0.72
  -2  -9   1    3.72    0.74
  -2  -9   1    4.13    0.83
   1   9  -1    6.13    1.24
   1   9  -1    5.22    0.80
   1   9  -1    7.12    0.91
   1   9  -1    4.71    0.83
   1   9  -1    5.43    0.72
   1   9  -1    5.98    0.92
   1   9  -1    4.96    0.88
  -1  -9   1    3.73    0.83
  -1  -9   1    6.15    1.33
  -1  -9   1    5.67    0.79
  -1  -9   1    7.12    1.12
   0   9  -1    4.29    0.91
   0   9  -1    5.77    0.89
   0   9  -1    6.57    0.87
   0   9  -1    5.55    0.59
   0   9  -1    4.79    1.11
   0   9  -1    6.17    0.89
   0  -9   1    5.58    1.04
   0  -9   1    5.46    0.92
   0  -9   1    6.17    1.25
   0  -9   1    4.94    0.78
   0  -9   1    4.63    0.78
  -1   9  -1    0.13    0.20
  -1   9  -1    0.14    0.66
  -1   9  -1    0.31    0.88
  -1   9  -1    0.08    0.60
  -1   9  -1   -1.15    0.74
  -1   9  -1   -0.33    0.87
   1  -9   1   -0.20    0.62
   1  -9   1    0.26    1.06
   1  -9   1    0.33    0.83
   1  -9   1   -0.63    0.51
  -2   9  -1    0.33    1.07
  -2   9  -1    0.81    0.82
  -2   9  -1    1.38    0.89
  -2   9  -1    0.35    0.93
   2  -9   1    1.23    0.59
   2  -9   1    0.64    0.80
   2  -9   1    2.76    1.13
   2  -9   1    1.53    0.94
  -3   9  -1    2.06    1.40
  -3   9  -1    1.29    0.88
  -3   9  -1    1.40    1.10
   3  -9   1    0.67    0.84
   3  -9   1    1.14    0.86
   3  -9   1   -0.04    1.09
   3  -9   1    1.03    0.91
   3  -9   1    1.67    0.51
  -4   9  -1    0.60    1.01
  -4   9  -1    0.45    1.11
   4  -9   1   -1.43    1.19
   4  -9   1   -0.15    0.32
   4  -9   1    0.08    0.96
   4  -9   1    0.59    1.18
   4  -9   1   -0.71    1.24
  -5   9  -1   -0.07    1.27
  -5   9  -1    1.90    1.30
   5  -9   1    0.79    1.23
   5  -9   1   -0.30    1.23
   5  -9   1    2.12    1.47
  -6   9  -1    0.73    1.57
  -6   9  -1    0.25    1.60
   6  -9   1   -0.64    1.53
   6  -9   1    1.33    1.81
   7   8  -1    1.58    1.79
   7   8  -1   -1.56    2.48
  -7  -8   1    0.05    1.70
  -7  -8   1   -0.66    1.83
   6   8  -1   -2.49    1.31
   6   8  -1    0.00    1.44
   6   8  -1   -0.09    2.05
  -6  -8   1    0.78    1.05
  -6  -8   1    0.62    1.26
  -6  -8   1    0.26    1.61
  -6  -8   1    0.38    1.27
   5   8  -1   -0.90    1.02
   5   8  -1   -0.17    1.60
   5   8  -1    1.91    1.12
  -5  -8   1    0.45    1.08
  -5  -8   1   -0.98    1.11
  -5  -8   1   -0.06    0.79
  -5  -8   1    0.36    1.03
  -5  -8   1    1.34    1.37
   4   8  -1    6.94    2.86
   4   8  -1    5.37    1.07
  -4  -8   1    4.77    1.21
  -4  -8   1    5.74    1.02
  -4  -8   1    6.48    0.81
  -4  -8   1    5.54    0.95
   3   8  -1   -0.09    0.67
   3   8  -1    0.98    0.72
   3   8  -1    0.57    0.69
   3   8  -1   -0.25    1.07
   3   8  -1    0.25    0.79
  -3  -8   1   -0.97    0.63
  -3  -8   1    0.27    0.58
  -3  -8   1    0.44    0.61
  -3  -8   1   -0.08    0.82
   2   8  -1    2.28    0.69
   2   8  -1    3.31    0.69
   2   8  -1    2.55    0.87
   2   8  -1    4.83    1.08
   2   8  -1    1.56    0.58
   2   8  -1    2.00    0.69
  -2  -8   1    2.53    1.12
  -2  -8   1    2.97    0.58
  -2  -8   1    2.24    0.87
  -2  -8   1    1.59    0.66
  -2  -8   1    3.37    0.57
  -2  -8   1    2.98    0.65
   1   8  -1   14.53    0.96
   1   8  -1   12.70    1.05
   1   8  -1   13.91    1.11
   1   8  -1   12.96    1.28
   1   8  -1   12.90    1.13
   1   8  -1   13.23    1.42
   1   8  -1   11.78    0.95
  -1  -8   1   11.88    1.36
  -1  -8   1   13.56    1.34
  -1  -8   1   12.89    1.02
  -1  -8   1   12.38    0.95
  -1  -8   1   13.32    1.11
   0   8  -1   -0.94    0.65
   0   8  -1   -0.09    0.51
   0   8  -1   -0.46    0.68
   0   8  -1   -0.18    0.51
   0   8  -1   -0.34    0.33
   0   8  -1   -0.01    0.46
   0  -8   1   -0.96    0.64
   0  -8   1   -0.42    0.45
   0  -8   1   -0.33    0.53
   0  -8   1   -1.59    0.78
   0  -8   1   -0.38    0.55
  -1   8  -1    5.83    0.85
  -1   8  -1    5.46    0.35
  -1   8  -1    5.57    0.76
  -1   8  -1    5.76    0.76
  -1   8  -1    4.99    1.05
  -1   8  -1    6.39    1.03
   1  -8   1    5.83    0.65
   1  -8   1    5.61    0.98
   1  -8   1    5.34    0.72
   1  -8   1    4.37    0.85
   1  -8   1    5.92    0.84
  -2   8  -1   26.39    1.55
  -2   8  -1   23.50    1.41
  -2   8  -1   26.40    1.65
  -2   8  -1   25.33    1.73
  -2   8  -1   25.90    1.58
   2  -8   1   26.67    1.66
   2  -8   1   24.16    1.48
   2  -8   1   26.89    1.22
   2  -8   1   24.45    1.63
  -3   8  -1    1.78    0.77
  -3   8  -1    1.34    0.82
  -3   8  -1    1.06    0.83
  -3   8  -1    1.71    1.11
   3  -8   1    0.92    0.82
   3  -8   1    1.80    0.81
   3  -8   1    0.80    0.94
   3  -8   1    0.89    0.41
   3  -8   1    1.74    0.82
  -4   8  -1   10.98    1.35
  -4   8  -1   13.85    1.93
  -4   8  -1   15.93    1.62
   4  -8   1   16.14    1.63
   4  -8   1   12.47    1.38
  -5   8  -1   -0.22    1.06
  -5   8  -1   -0.56    1.07
   5  -8   1    3.49    1.38
   5  -8   1    0.33    1.27
   5  -8   1    0.78    1.02
   5  -8   1    0.52    1.05
  -6   8  -1   -1.06    1.36
  -6   8  -1    0.08    1.36
   6  -8   1   -1.26    1.72
   6  -8   1   -2.55    1.22
   7   7  -1    1.96    1.87
   7   7  -1    0.30    2.30
   7   7  -1   -0.49    1.54
  -7  -7   1    3.10    2.07
  -7  -7   1    2.10    1.52
  -7  -7   1   -1.67    1.68
   6   7  -1   -1.41    1.27
   6   7  -1   -0.11    1.17
   6   7  -1   -0.76    1.95
  -6  -7   1   -0.06    0.95
  -6  -7   1    1.58    1.63
  -6  -7   1   -0.53    1.09
  -6  -7   1   -1.01    1.23
   5   7  -1    3.51    1.05
   5   7  -1    1.66    1.08
  -5  -7   1    3.83    0.84
  -5  -7   1    3.91    1.13
  -5  -7   1    5.39    1.07
  -5  -7   1    3.03    1.27
  -5  -7   1    4.27    1.05
   4   7  -1    0.38    0.71
   4   7  -1   -0.13    0.88
   4   7  -1    2.12    1.24
   4   7  -1    1.10    0.79
  -4  -7   1    1.69    0.77
  -4  -7   1    1.28    0.60
  -4  -7   1    0.42    0.94
  -4  -7   1    0.89    0.78
  -4  -7   1    0.33    0.72
   3   7  -1    0.32    0.93
   3   7  -1    1.69    0.68
   3   7  -1    0.97    0.62
   3   7  -1    1.01    0.61
   3   7  -1   -0.16    0.74
   3   7  -1    0.93    0.63
  -3  -7   1    1.77    0.64
  -3  -7   1    0.52    1.09
  -3  -7   1    0.87    0.52
  -3  -7   1    0.92    0.47
  -3  -7   1   -0.96    0.64
  -3  -7   1    1.77    0.86
   2   7  -1    2.72    0.73
   2   7  -1    2.20    0.61
   2   7  -1    2.06    0.64
   2   7  -1    2.83    0.79
   2   7  -1    3.18    0.59
  -2  -7   1    2.77    0.57
  -2  -7   1    3.32    0.92
  -2  -7   1    2.22    0.78
  -2  -7   1    2.57    0.62
  -2  -7   1    3.41    0.53
  -2  -7   1    2.19    0.59
   1   7  -1   19.26    1.18
   1   7  -1   18.82    0.94
   1   7  -1   19.32    1.28
   1   7  -1   21.21    1.14
   1   7  -1   20.85    1.11
   1   7  -1   19.75    1.47
  -1  -7   1   20.21    1.16
  -1  -7   1   20.15    1.35
  -1  -7   1   21.95    1.10
  -1  -7   1   20.19    1.49
  -1  -7   1   19.22    1.00
   0   7  -1    3.17    0.57
   0   7  -1    1.82    0.34
   0   7  -1    2.10    0.64
   0   7  -1    2.21    0.56
   0   7  -1    1.83    0.58
   0   7  -1    2.81    0.53
   0  -7   1    2.52    0.63
   0  -7   1    3.07    0.55
   0  -7   1    2.08    0.52
   0  -7   1    2.35    0.73
   0  -7   1    2.69    0.70
  -1   7  -1    7.22    0.32
  -1   7  -1    7.17    0.80
  -1   7  -1    8.20    0.98
  -1   7  -1    7.16    0.75
  -1   7  -1    8.28    0.94
  -1   7  -1    6.80    0.71
   1  -7   1    6.30    0.93
   1  -7   1    7.17    0.84
   1  -7   1    7.49    0.69
   1  -7   1    6.55    0.80
   1  -7   1    7.36    0.74
  -2   7  -1    1.07    0.65
  -2   7  -1    1.14    0.57
  -2   7  -1    0.90    0.50
  -2   7  -1    0.30    0.62
  -2   7  -1    0.56    0.71
  -2   7  -1    0.86    0.52
   2  -7   1   -0.18    0.51
   2  -7   1    0.55    0.67
   2  -7   1    0.85    0.67
   2  -7   1   -0.60    0.33
  -3   7  -1    2.92    0.86
  -3   7  -1    2.96    0.78
  -3   7  -1    2.42    0.71
  -3   7  -1    2.54    0.92
  -3   7  -1    3.38    0.81
  -3   7  -1    3.88    0.80
   3  -7   1    3.56    0.41
   3  -7   1    3.11    0.75
   3  -7   1    2.64    0.80
   3  -7   1    3.00    0.86
   3  -7   1    4.47    0.84
  -4   7  -1   -0.45    1.02
  -4   7  -1    0.72    0.77
  -4   7  -1    1.27    0.79
   4  -7   1   -0.14    0.83
   4  -7   1    1.07    0.84
   4  -7   1    0.75    0.76
   4  -7   1   -0.61    0.86
  -5   7  -1    0.69    1.01
   5  -7   1    1.47    1.17
   5  -7   1    0.41    0.41
   5  -7   1    1.04    1.03
   5  -7   1    2.57    1.17
   5  -7   1    0.61    0.99
  -6   7  -1    2.05    1.18
  -6   7  -1    3.05    1.25
   6  -7   1    1.86    1.65
   6  -7   1   -0.14    1.71
   6  -7   1    1.08    1.21
  -7   7  -1    0.82    1.56
  -7   7  -1    1.45    1.59
   7  -7   1    2.13    2.24
   7   6  -1   -0.94    1.64
   7   6  -1   -0.48    1.46
   7   6  -1   -0.92    2.12
  -7  -6   1   -0.31    1.73
  -7  -6   1    5.26    1.70
  -7  -6   1   -0.69    1.29
   6   6  -1   -0.90    0.60
   6   6  -1   -0.39    1.16
   6   6  -1    0.54    1.74
   6   6  -1   -1.66    0.97
  -6  -6   1   -1.85    1.23
  -6  -6   1    1.19    1.06
  -6  -6   1   -1.03    0.94
   5   6  -1    0.35    1.21
   5   6  -1    0.76    0.88
   5   6  -1    0.37    0.83
  -5  -6   1   -0.20    0.90
  -5  -6   1    0.97    0.97
  -5  -6   1   -0.98    0.60
  -5  -6   1   -0.11    0.77
  -5  -6   1   -0.42    0.89
   4   6  -1   -0.51    1.02
   4   6  -1    0.97    0.72
   4   6  -1   -0.06    0.63
   4   6  -1    0.62    0.89
   4   6  -1   -0.49    0.63
   4   6  -1    0.83    0.71
  -4  -6   1    1.08    0.51
  -4  -6   1    1.36    0.83
  -4  -6   1    0.49    0.64
  -4  -6   1    0.60    0.67
  -4  -6   1    0.27    0.59
  -4  -6   1    1.15    0.70
  -4  -6   1    0.51    1.04
   3   6  -1    9.89    1.21
   3   6  -1   10.06    0.94
   3   6  -1    9.13    0.97
   3   6  -1    9.12    1.02
   3   6  -1   10.35    1.07
  -3  -6   1    8.62    1.05
  -3  -6   1   10.94    0.76
  -3  -6   1    8.85    0.90
  -3  -6   1    9.47    0.98
  -3  -6   1    9.48    0.84
  -3  -6   1    8.31    0.91
  -3  -6   1    8.88    1.25
   2   6  -1   11.17    0.84
   2   6  -1   12.22    1.25
   2   6  -1   11.50    0.96
   2   6  -1   11.49    0.84
   2   6  -1   13.45    1.03
  -2  -6   1   11.12    0.70
  -2  -6   1   11.09    1.05
  -2  -6   1   12.30    1.28
  -2  -6   1   11.79    0.86
  -2  -6   1   13.17    0.96
  -2  -6   1   11.89    0.79
   1   6  -1   18.33    1.06
   1   6  -1   18.65    1.04
   1   6  -1   19.06    1.29
   1   6  -1   19.29    0.97
   1   6  -1   18.24    0.98
   1   6  -1   18.17    0.84
  -1  -6   1   19.26    0.99
  -1  -6   1   19.36    1.17
  -1  -6   1   18.41    0.87
  -1  -6   1   19.74    1.28
  -1  -6   1   18.98    0.95
   0   6  -1    7.10    0.77
   0   6  -1    5.93    0.63
   0   6  -1    6.76    0.64
   0   6  -1    6.63    0.66
   0   6  -1    6.78    0.78
   0  -6   1    6.32    0.63
   0  -6   1    6.92    0.81
   0  -6   1    8.58    0.89
   0  -6   1    6.78    0.64
  -1   6  -1   16.37    0.89
  -1   6  -1   16.67    0.96
  -1   6  -1   14.27    0.84
  -1   6  -1   15.71    1.04
  -1   6  -1   15.93    1.12
  -1   6  -1   15.92    0.44
   1  -6   1   15.72    0.89
   1  -6   1   15.59    1.08
   1  -6   1   17.45    1.05
   1  -6   1   15.81    0.97
   1  -6   1   16.57    0.97
  -2   6  -1    8.48    0.93
  -2   6  -1    8.79    0.84
  -2   6  -1    9.22    0.82
  -2   6  -1    8.07    0.85
  -2   6  -1    8.90    0.94
  -2   6  -1   11.73    1.00
   2  -6   1    9.37    0.87
   2  -6   1    9.04    0.92
   2  -6   1    9.46    0.61
   2  -6   1    8.48    0.84
  -3   6  -1    8.63    1.02
  -3   6  -1    9.18    0.99
  -3   6  -1    8.69    0.96
  -3   6  -1    7.15    0.81
  -3   6  -1    7.72    1.01
   3  -6   1   11.08    1.12
   3  -6   1    9.13    0.97
   3  -6   1    8.17    0.97
   3  -6   1    7.42    0.99
   3  -6   1    7.65    0.48
  -4   6  -1   12.85    1.30
  -4   6  -1   12.94    1.40
  -4   6  -1   13.50    1.36
  -4   6  -1   14.96    1.48
   4  -6   1   13.14    1.26
   4  -6   1   12.11    0.65
   4  -6   1   16.08    1.32
   4  -6   1   13.68    1.42
   4  -6   1   14.14    1.50
  -5   6  -1   -2.48    1.41
  -5   6  -1   -0.41    0.84
  -5   6  -1    0.58    0.79
   5  -6   1   -1.51    0.88
   5  -6   1    1.28    1.03
   5  -6   1    0.54    0.92
   5  -6   1    0.81    0.93
   5  -6   1    0.14    0.54
  -6   6  -1    0.60    1.10
   6  -6   1    0.33    1.20
   6  -6   1    0.85    0.84
   6  -6   1    1.35    1.41
  -7   6  -1    1.42    1.59
  -7   6  -1    1.17    1.67
   7  -6   1   -0.62    2.00
   7   5  -1   -2.31    1.43
   7   5  -1   -1.12    1.93
   7   5  -1   -1.91    1.53
   7   5  -1    0.97    1.33
  -7  -5   1   -3.56    1.70
  -7  -5   1   -1.51    1.39
  -7  -5   1    0.37    1.29
   6   5  -1   -1.28    1.07
   6   5  -1    1.36    1.40
   6   5  -1   -0.76    1.05
   6   5  -1   -0.52    0.99
  -6  -5   1    0.60    1.01
  -6  -5   1    0.73    0.97
  -6  -5   1   -2.73    1.24
   5   5  -1    2.48    0.96
   5   5  -1    1.05    0.77
   5   5  -1    1.84    0.85
   5   5  -1    1.64    1.16
  -5  -5   1    0.76    0.88
  -5  -5   1    1.45    0.76
  -5  -5   1    1.86    0.83
  -5  -5   1    3.59    0.83
  -5  -5   1    1.57    0.99
   4   5  -1    6.97    0.87
   4   5  -1    8.09    0.96
   4   5  -1    5.69    0.86
   4   5  -1    7.98    1.35
   4   5  -1    6.81    0.93
   4   5  -1    7.58    0.94
  -4  -5   1    7.29    0.87
  -4  -5   1    8.31    0.95
  -4  -5   1    8.33    1.32
  -4  -5   1    8.59    0.98
  -4  -5   1    6.18    1.00
  -4  -5   1    5.62    0.81
   3   5  -1    0.96    0.52
   3   5  -1    0.64    0.70
   3   5  -1    0.97    0.50
   3   5  -1    1.17    0.47
   3   5  -1    0.81    0.53
  -3  -5   1    0.73    0.42
  -3  -5   1    1.35    0.77
  -3  -5   1    0.82    0.60
  -3  -5   1    1.04    0.49
  -3  -5   1    0.40    0.34
  -3  -5   1    0.66    0.52
  -3  -5   1    0.82    0.49
   2   5  -1    0.87    0.47
   2   5  -1    1.45    0.40
   2   5  -1    1.53    0.41
   2   5  -1    1.51    0.46
   2   5  -1    1.59    0.63
  -2  -5   1    1.35    0.42
  -2  -5   1    1.46    0.42
  -2  -5   1    1.48    0.44
  -2  -5   1    1.14    0.51
  -2  -5   1    2.02    0.63
  -2  -5   1    1.29    0.38
   1   5  -1    6.58    0.60
   1   5  -1    7.89    0.49
   1   5  -1    8.76    0.70
   1   5  -1    7.36    0.57
   1   5  -1    6.45    0.56
   1   5  -1    6.87    0.73
  -1  -5   1    8.54    0.84
  -1  -5   1    6.24    0.55
  -1  -5   1    6.94    0.75
  -1  -5   1    6.54    0.58
  -1  -5   1    7.50    0.63
   0   5  -1    0.27    0.28
   0   5  -1   -0.06    0.39
   0   5  -1    0.22    0.18
   0   5  -1    0.15    0.26
   0   5  -1    0.58    0.28
   0   5  -1   -0.07    0.33
   0  -5   1    0.15    0.40
   0  -5   1    0.10    0.25
   0  -5   1   -0.12    0.30
   0  -5   1   -0.19    0.39
  -1   5  -1    1.20    0.29
  -1   5  -1    1.77    0.41
  -1   5  -1    1.31    0.30
  -1   5  -1    1.04    0.44
  -1   5  -1    0.84    0.41
   1  -5   1    1.05    0.27
   1  -5   1    1.28    0.44
   1  -5   1    1.43    0.38
   1  -5   1    2.02    0.45
  -2   5  -1   28.00    1.17
  -2   5  -1   28.35    1.29
  -2   5  -1   28.22    1.31
  -2   5  -1   30.11    1.24
  -2   5  -1   27.36    1.27
   2  -5   1   27.98    1.29
   2  -5   1   26.93    1.24
   2  -5   1   26.26    1.27
   2  -5   1   27.75    0.92
  -3   5  -1    0.80    0.52
  -3   5  -1   -0.63    0.60
  -3   5  -1   -0.02    0.48
  -3   5  -1   -0.24    0.49
   3  -5   1    0.15    0.53
   3  -5   1    0.12    0.19
   3  -5   1    0.24    0.50
   3  -5   1    0.32    0.14
   3  -5   1    0.08    0.56
   3  -5   1    0.39    0.46
  -4   5  -1    4.24    0.75
  -4   5  -1    4.68    0.88
  -4   5  -1    4.28    0.95
  -4   5  -1    3.40    0.81
   4  -5   1    5.27    0.83
   4  -5   1    3.42    0.86
   4  -5   1    4.13    0.82
   4  -5   1    5.23    0.87
   4  -5   1    4.18    0.50
   4  -5   1    2.61    0.80
  -5   5  -1   26.98    1.61
  -5   5  -1   21.50    1.88
  -5   5  -1   27.96    2.34
   5  -5   1   25.35    1.74
   5  -5   1   22.13    2.38
   5  -5   1   22.25    1.63
   5  -5   1   23.33    1.71
   5  -5   1   23.63    1.31
  -6   5  -1    2.01    0.64
  -6   5  -1    1.51    0.98
  -6   5  -1    1.32    1.11
   6  -5   1    1.39    0.86
   6  -5   1    2.00    1.35
   6  -5   1    3.66    1.23
   6  -5   1    1.80    1.17
  -7   5  -1    2.00    1.44
  -7   5  -1    0.67    1.29
  -7   5  -1    2.17    1.67
   7  -5   1    2.49    1.93
   7  -5   1    1.52    1.30
   8   4  -1    1.87    2.06
  -8  -4   1   -1.69    1.96
   7   4  -1   -0.03    1.36
   7   4  -1   -0.16    1.37
   7   4  -1    0.59    1.29
   7   4  -1    0.53    1.81
  -7  -4   1   -0.98    1.19
  -7  -4   1    0.09    1.64
  -7  -4   1   -2.23    1.38
   6   4  -1   18.52    1.75
   6   4  -1   16.00    1.71
   6   4  -1   22.57    2.40
   6   4  -1   23.15    1.90
  -6  -4   1   16.79    1.69
  -6  -4   1   18.45    1.72
  -6  -4   1   16.23    1.80
  -6  -4   1   19.21    1.89
   5   4  -1    1.81    0.82
   5   4  -1    1.73    1.22
   5   4  -1    1.57    0.84
   5   4  -1    1.90    0.85
   5   4  -1    3.26    0.78
   5   4  -1    2.17    0.42
   5   4  -1    2.47    0.79
  -5  -4   1    2.46    0.79
  -5  -4   1    2.09    0.88
  -5  -4   1    3.00    0.76
  -5  -4   1    2.01    1.27
  -5  -4   1    2.69    0.93
  -5  -4   1    1.15    0.79
   4   4  -1    2.78    0.69
   4   4  -1    2.94    0.72
   4   4  -1    2.22    0.70
   4   4  -1    2.41    0.62
   4   4  -1    1.47    0.87
   4   4  -1    2.31    0.64
   4   4  -1    2.56    0.68
  -4  -4   1    1.45    0.59
  -4  -4   1    2.08    0.61
  -4  -4   1    2.18    0.70
  -4  -4   1    3.45    0.99
  -4  -4   1    2.10    0.62
  -4  -4   1    2.37    0.62
   3   4  -1    6.24    0.90
   3   4  -1    4.96    0.67
   3   4  -1    5.63    0.68
   3   4  -1    6.65    0.69
   3   4  -1    6.25    0.74
   3   4  -1    7.13    0.72
  -3  -4   1    6.10    0.96
  -3  -4   1    6.55    0.71
  -3  -4   1    7.19    0.74
  -3  -4   1    7.69    0.75
  -3  -4   1    5.95    0.77
  -3  -4   1    6.10    0.68
   2   4  -1    0.38    0.36
   2   4  -1    0.19    0.25
   2   4  -1    0.44    0.29
   2   4  -1    0.52    0.52
   2   4  -1    0.10    0.25
  -2  -4   1    0.74    0.31
  -2  -4   1    0.07    0.45
  -2  -4   1   -0.06    0.18
  -2  -4   1    0.20    0.22
  -2  -4   1    0.24    0.28
  -2  -4   1   -0.15    0.31
  -2  -4   1    0.27    0.40
   1   4  -1   66.86    2.14
   1   4  -1   65.34    1.96
   1   4  -1   67.27    1.87
   1   4  -1   66.26    1.70
   1   4  -1   68.40    2.05
   1   4  -1   66.24    1.88
  -1  -4   1   66.56    2.15
  -1  -4   1   67.33    1.99
  -1  -4   1   62.79    2.01
  -1  -4   1   68.57    1.90
  -1  -4   1   65.69    1.71
   0   4  -1    4.21    0.31
   0   4  -1    4.67    0.45
   0   4  -1    5.04    0.57
   0   4  -1    5.22    0.53
   0   4  -1    5.69    0.42
   0   4  -1    5.46    0.43
   0  -4   1    4.51    0.54
   0  -4   1    5.45    0.41
   0  -4   1    6.02    0.46
   0  -4   1    5.52    0.57
  -1   4  -1    0.22    0.27
  -1   4  -1    0.28    0.19
  -1   4  -1    0.03    0.25
  -1   4  -1    0.22    0.33
  -1   4  -1    0.58    0.35
  -1   4  -1    0.30    0.26
   1  -4   1    0.41    0.34
   1  -4   1    0.54    0.29
   1  -4   1    0.35    0.20
   1  -4   1    0.43    0.35
  -2   4  -1   28.81    1.17
  -2   4  -1   31.05    1.27
  -2   4  -1   29.77    1.23
   2  -4   1   31.31    0.88
   2  -4   1   29.04    1.20
   2  -4   1   29.33    1.20
   2  -4   1   29.33    1.24
   2  -4   1   29.22    0.75
  -3   4  -1    2.33    0.50
  -3   4  -1    1.46    0.47
  -3   4  -1    1.25    0.50
  -3   4  -1    2.15    0.61
   3  -4   1    3.09    0.52
   3  -4   1    1.68    0.51
   3  -4   1    2.01    0.52
   3  -4   1    1.87    0.28
   3  -4   1    1.45    0.50
   3  -4   1    1.97    0.63
  -4   4  -1    4.66    0.78
  -4   4  -1    4.35    0.80
  -4   4  -1    4.51    0.80
  -4   4  -1    6.80    0.99
   4  -4   1    5.32    0.78
   4  -4   1    6.72    0.86
   4  -4   1    5.00    0.81
   4  -4   1    4.98    0.79
   4  -4   1    5.10    0.55
   4  -4   1    4.64    0.89
  -5   4  -1    0.32    0.85
  -5   4  -1    0.41    0.66
  -5   4  -1   -0.24    0.40
  -5   4  -1    1.08    1.17
   5  -4   1   -0.13    0.77
   5  -4   1   -0.51    0.57
   5  -4   1    0.30    0.83
   5  -4   1    0.51    0.82
  -6   4  -1    3.09    1.05
  -6   4  -1    4.22    0.43
  -6   4  -1    4.75    1.18
   6  -4   1    5.63    1.20
   6  -4   1    6.17    1.45
   6  -4   1    3.85    1.00
   6  -4   1    3.15    1.18
  -7   4  -1    1.54    1.31
  -7   4  -1   -0.40    1.29
  -7   4  -1    0.40    1.31
   7  -4   1   -2.80    1.16
   7  -4   1    1.89    1.69
   8   3  -1   -0.27    1.78
   8   3  -1    1.00    2.03
  -8  -3   1    0.61    1.95
  -8  -3   1    1.52    1.71
  -8  -3   1   -1.04    1.55
   7   3  -1   -0.62    1.41
   7   3  -1    1.35    1.68
   7   3  -1   -2.43    1.30
  -7  -3   1    0.53    1.10
  -7  -3   1   -0.40    1.30
  -7  -3   1   -1.04    1.12
   6   3  -1    8.35    1.30
   6   3  -1    7.67    1.29
   6   3  -1    9.22    1.14
   6   3  -1    7.20    1.56
  -6  -3   1    9.38    1.24
  -6  -3   1    8.64    1.22
  -6  -3   1    8.61    1.14
  -6  -3   1    8.60    1.34
   5   3  -1   10.83    1.12
   5   3  -1   12.54    1.28
   5   3  -1   10.37    1.36
   5   3  -1   10.60    0.47
   5   3  -1   11.31    1.10
   5   3  -1   11.05    1.21
   5   3  -1    9.75    1.16
  -5  -3   1   10.42    1.06
  -5  -3   1   11.65    1.18
  -5  -3   1   12.28    1.30
  -5  -3   1   11.75    1.21
  -5  -3   1   15.29    1.39
  -5  -3   1   10.11    1.47
   4   3  -1    2.17    0.65
   4   3  -1    1.36    0.58
   4   3  -1    1.34    0.54
   4   3  -1    3.14    0.59
   4   3  -1    1.58    0.80
   4   3  -1    0.85    0.54
   4   3  -1    3.03    0.68
  -4  -3   1    1.69    0.55
  -4  -3   1    1.99    0.55
  -4  -3   1    1.85    0.64
  -4  -3   1    1.79    0.65
  -4  -3   1    2.52    0.65
  -4  -3   1    4.09    0.91
   3   3  -1   41.10    1.73
   3   3  -1   41.16    1.49
   3   3  -1   40.66    1.47
   3   3  -1   40.49    1.48
   3   3  -1   41.70    1.57
   3   3  -1   40.78    1.53
  -3  -3   1   42.49    1.77
  -3  -3   1   41.59    1.48
  -3  -3   1   38.00    1.60
  -3  -3   1   42.23    1.54
  -3  -3   1   41.06    1.50
  -3  -3   1   41.98    1.55
   2   3  -1   33.76    1.15
   2   3  -1   34.01    1.23
   2   3  -1   32.61    1.18
   2   3  -1   32.77    1.38
   2   3  -1   34.55    1.25
  -2  -3   1   33.22    1.28
  -2  -3   1   33.97    1.24
  -2  -3   1   34.00    1.18
  -2  -3   1   34.59    1.20
  -2  -3   1   33.36    1.19
   1   3  -1    0.11    0.20
   1   3  -1   -0.12    0.11
   1   3  -1   -0.22    0.15
   1   3  -1    0.04    0.20
   1   3  -1   -0.10    0.24
   1   3  -1    0.06    0.32
  -1  -3   1   -0.32    0.30
  -1  -3   1   -0.22    0.24
  -1  -3   1   -0.06    0.11
  -1  -3   1   -0.10    0.20
  -1  -3   1    0.06    0.21
   0   3  -1    7.85    0.39
   0   3  -1    8.46    0.59
   0   3  -1    8.19    0.43
   0   3  -1    8.13    0.44
   0   3  -1    7.69    0.47
   0   3  -1    8.33    0.35
   0  -3   1    8.40    0.45
   0  -3   1    8.23    0.56
   0  -3   1    7.01    0.49
  -1   3  -1   53.70    1.55
  -1   3  -1   52.29    1.50
  -1   3  -1   50.91    1.56
  -1   3  -1   50.36    1.45
  -1   3  -1   51.31    1.57
   1  -3   1   53.16    1.36
   1  -3   1   50.27    1.49
   1  -3   1   52.04    1.56
  -2   3  -1  102.25    2.76
  -2   3  -1  104.57    2.83
  -2   3  -1  101.28    2.74
  -2   3  -1  103.49    2.82
   2  -3   1  102.05    2.76
   2  -3   1  107.25    2.84
   2  -3   1  105.10    2.81
   2  -3   1  104.73    2.37
   2  -3   1  101.34    2.75
   2  -3   1  102.81    2.43
   2  -3   1  100.95    2.85
  -3   3  -1    9.60    0.83
  -3   3  -1   10.47    0.79
  -3   3  -1   11.17    0.79
  -3   3  -1   13.22    0.95
   3  -3   1   11.15    0.85
   3  -3   1   10.41    0.83
   3  -3   1   11.52    0.85
   3  -3   1   10.84    0.64
   3  -3   1    8.70    0.80
   3  -3   1   10.37    0.85
  -4   3  -1   12.16    1.01
  -4   3  -1   10.70    0.98
  -4   3  -1   10.85    0.91
  -4   3  -1   10.73    1.19
   4  -3   1   11.26    1.01
   4  -3   1   11.63    0.94
   4  -3   1   10.79    0.84
   4  -3   1   10.35    1.11
   4  -3   1   10.40    1.13
  -5   3  -1    2.59    0.81
  -5   3  -1    2.89    0.32
  -5   3  -1    1.80    0.79
  -5   3  -1    2.64    0.74
  -5   3  -1    2.40    1.04
   5  -3   1    2.63    0.87
   5  -3   1    0.90    0.88
   5  -3   1    1.89    0.67
   5  -3   1    1.91    0.79
  -6   3  -1    0.98    0.95
  -6   3  -1   -1.25    0.77
   6  -3   1   -0.28    0.84
   6  -3   1    0.37    1.16
   6  -3   1    2.21    1.25
   6  -3   1    1.37    1.06
  -7   3  -1    0.75    1.19
  -7   3  -1   -1.93    1.36
  -7   3  -1   -1.79    1.21
   7  -3   1    2.05    1.54
   7  -3   1   -0.77    1.46
   7  -3   1   -0.80    1.14
  -8   3  -1    0.40    1.66
  -8   3  -1    2.59    1.71
  -8   3  -1    2.36    1.79
   8  -3   1   -4.33    1.56
   8  -3   1   -4.71    2.25
   8   2  -1    0.75    1.80
   8   2  -1   -1.32    1.95
  -8  -2   1    2.77    1.68
  -8  -2   1    0.52    2.10
  -8  -2   1    1.53    1.58
   7   2  -1   -0.03    1.25
   7   2  -1    0.34    1.52
   7   2  -1   -0.50    1.22
   7   2  -1   -0.04    1.52
  -7  -2   1    0.49    1.39
  -7  -2   1    1.35    1.14
  -7  -2   1    0.16    1.15
   6   2  -1    7.21    1.09
   6   2  -1    5.26    1.18
   6   2  -1    7.59    1.00
   6   2  -1    7.96    1.43
   6   2  -1    5.70    1.40
  -6  -2   1    6.84    1.12
  -6  -2   1    7.71    1.11
  -6  -2   1    7.11    0.90
   5   2  -1    5.75    0.96
   5   2  -1    4.32    0.74
   5   2  -1    4.63    0.83
   5   2  -1    2.94    0.65
   5   2  -1    4.76    0.97
  -5  -2   1    4.54    0.85
  -5  -2   1    4.01    0.81
  -5  -2   1    5.43    1.13
  -5  -2   1    3.93    0.91
  -5  -2   1    5.05    0.81
  -5  -2   1    4.66    0.71
   4   2  -1   22.81    1.15
   4   2  -1   22.22    1.38
   4   2  -1   23.56    1.20
   4   2  -1   22.91    1.19
   4   2  -1   22.21    1.37
   4   2  -1   22.78    1.22
   4   2  -1   21.95    1.20
   4   2  -1   22.74    0.69
  -4  -2   1   23.31    1.35
  -4  -2   1   21.82    1.24
  -4  -2   1   21.91    1.21
  -4  -2   1   23.38    1.26
  -4  -2   1   21.51    1.46
  -4  -2   1   21.70    1.08
   3   2  -1   15.92    0.87
   3   2  -1   17.01    0.84
   3   2  -1   16.24    0.96
   3   2  -1   16.58    1.03
   3   2  -1   16.98    0.98
   3   2  -1   17.86    0.90
   3   2  -1   17.93    0.91
  -3  -2   1   15.14    0.86
  -3  -2   1   16.35    0.92
  -3  -2   1   16.00    1.09
  -3  -2   1   17.33    0.91
  -3  -2   1   15.82    0.95
  -3  -2   1   15.84    0.93
   2   2  -1  170.15    4.27
   2   2  -1  178.13    4.28
   2   2  -1  181.73    4.46
   2   2  -1  174.14    4.35
   2   2  -1  181.77    4.28
   2   2  -1  172.00    4.28
  -2  -2   1  181.62    4.33
  -2  -2   1  176.01    4.33
  -2  -2   1  174.74    4.27
  -2  -2   1  176.82    4.28
  -2  -2   1  180.61    4.34
  -2  -2   1  183.78    4.49
   1   2  -1  442.64    9.94
   1   2  -1  457.07    9.94
   1   2  -1  436.74    9.90
   1   2  -1  448.64    9.95
   1   2  -1  448.38   10.04
   1   2  -1  445.54    9.87
  -1  -2   1  473.64    9.98
  -1  -2   1  429.03    9.86
  -1  -2   1  446.07    9.97
  -1  -2   1  426.01    9.89
  -1  -2   1  438.62   10.06
  -1  -2   1  446.61    9.92
  -1  -2   1  433.54    9.72
   0   2  -1   78.68    1.82
   0   2  -1   77.44    1.91
   0   2  -1   76.93    1.86
   0   2  -1   78.58    1.93
   0   2  -1   80.91    2.00
   0   2  -1   73.52    1.99
   0  -2   1   79.23    1.92
   0  -2   1   73.90    2.00
   0  -2   1   80.72    1.92
   0  -2   1   76.77    1.99
  -1   2  -1    2.42    0.27
  -1   2  -1    2.69    0.26
  -1   2  -1    2.11    0.30
  -1   2  -1    2.25    0.29
   1  -2   1    1.72    0.24
   1  -2   1    2.01    0.26
   1  -2   1    2.08    0.28
   1  -2   1    2.03    0.19
   1  -2   1    2.15    0.30
  -2   2  -1  132.85    3.47
  -2   2  -1  140.23    3.41
  -2   2  -1  133.26    3.38
  -2   2  -1  134.92    3.46
   2  -2   1  135.85    3.45
   2  -2   1  134.85    3.38
   2  -2   1  135.93    3.53
   2  -2   1  135.27    3.41
   2  -2   1  136.95    3.03
   2  -2   1  140.23    3.48
  -3   2  -1   38.46    1.44
  -3   2  -1   39.02    1.36
  -3   2  -1   41.66    1.57
  -3   2  -1   39.15    1.41
   3  -2   1   36.73    0.94
   3  -2   1   35.04    1.46
   3  -2   1   35.96    1.39
   3  -2   1   38.49    1.57
   3  -2   1   35.39    1.44
   3  -2   1   38.30    1.45
  -4   2  -1   30.88    0.89
  -4   2  -1   31.02    1.42
  -4   2  -1   32.70    1.53
  -4   2  -1   32.67    1.62
  -4   2  -1   31.69    1.47
   4  -2   1   32.20    1.50
   4  -2   1   32.69    1.61
   4  -2   1   31.56    0.88
   4  -2   1   32.07    1.59
   4  -2   1   33.99    1.38
   4  -2   1   35.18    1.44
  -5   2  -1   -0.22    0.62
  -5   2  -1    1.33    0.69
  -5   2  -1    1.46    0.70
  -5   2  -1    2.39    0.79
  -5   2  -1    1.51    1.00
   5  -2   1    1.38    0.70
   5  -2   1    1.69    0.93
   5  -2   1    0.56    0.68
   5  -2   1   -0.17    0.74
   5  -2   1    1.14    0.82
  -6   2  -1    9.18    1.26
  -6   2  -1    9.76    1.24
  -6   2  -1    9.44    1.14
   6  -2   1   10.42    1.56
   6  -2   1   11.01    1.26
   6  -2   1   11.69    1.24
   6  -2   1   11.09    1.46
  -7   2  -1    2.09    1.47
  -7   2  -1    4.47    1.40
  -7   2  -1    0.70    1.11
   7  -2   1    2.01    1.13
   7  -2   1    2.11    1.52
   7  -2   1    3.22    1.59
  -8   2  -1    1.09    1.74
  -8   2  -1   -2.05    1.55
  -8   2  -1   -1.38    1.70
   8  -2   1   -1.38    2.03
   8  -2   1   -0.18    1.93
   8   1  -1   -2.26    1.82
   8   1  -1    2.28    1.89
  -8  -1   1   -1.62    1.74
  -8  -1   1    0.87    1.53
  -8  -1   1   -0.68    1.71
   7   1  -1    3.65    1.51
   7   1  -1    3.71    1.36
   7   1  -1    4.77    1.54
  -7  -1   1    3.59    1.14
  -7  -1   1    4.60    1.27
  -7  -1   1    2.77    1.31
   6   1  -1   -1.83    1.04
   6   1  -1   -0.73    0.86
   6   1  -1   -1.90    0.83
  -6  -1   1   -0.17    0.58
  -6  -1   1    0.08    0.85
  -6  -1   1    0.61    0.81
  -6  -1   1    0.71    0.92
   5   1  -1    7.18    0.98
   5   1  -1    8.82    1.16
   5   1  -1    9.24    0.89
   5   1  -1    7.78    1.03
   5   1  -1    8.47    0.85
   5   1  -1    7.56    1.00
  -5  -1   1    8.55    1.12
  -5  -1   1    9.11    1.24
  -5  -1   1    8.90    1.04
  -5  -1   1    8.67    1.00
  -5  -1   1    8.54    1.03
  -5  -1   1    7.43    1.02
  -5  -1   1    8.01    0.81
   4   1  -1    0.34    0.45
   4   1  -1    0.35    0.48
   4   1  -1    0.77    0.37
   4   1  -1   -0.08    0.59
   4   1  -1    0.35    0.47
  -4  -1   1    1.11    0.53
  -4  -1   1    0.86    0.65
  -4  -1   1    0.29    0.38
  -4  -1   1    0.34    0.42
  -4  -1   1    0.02    0.46
  -4  -1   1    1.05    0.55
   3   1  -1   32.31    0.84
   3   1  -1   31.30    1.12
   3   1  -1   32.67    1.36
   3   1  -1   33.53    1.23
   3   1  -1   31.84    1.28
   3   1  -1   31.62    1.12
   3   1  -1   32.37    1.23
   3   1  -1   31.20    1.34
  -3  -1   1   31.69    1.09
  -3  -1   1   32.54    1.32
  -3  -1   1   30.85    1.23
  -3  -1   1   32.27    1.53
  -3  -1   1   32.82    1.25
  -3  -1   1   30.18    1.23
   2   1  -1    3.57    0.36
   2   1  -1    3.62    0.37
   2   1  -1    4.21    0.35
   2   1  -1    4.44    0.24
   2   1  -1    3.58    0.38
   2   1  -1    4.48    0.46
   2   1  -1    5.08    0.46
   2   1  -1    3.81    0.42
  -2  -1   1    3.39    0.42
  -2  -1   1    4.27    0.41
  -2  -1   1    3.87    0.41
  -2  -1   1    3.73    0.40
  -2  -1   1    3.80    0.33
  -2  -1   1    4.99    0.53
   1   1  -1  207.92    4.74
   1   1  -1  204.27    4.82
   1   1  -1  197.23    4.81
   1   1  -1  213.64    4.76
   1   1  -1  215.66    4.79
   1   1  -1  207.16    4.78
   1   1  -1  216.38    4.82
  -1  -1   1  202.78    4.78
  -1  -1   1  214.41    4.85
  -1  -1   1  214.77    4.78
  -1  -1   1  214.31    4.83
  -1  -1   1  212.08    4.77
  -1  -1   1  206.85    4.74
   0   1  -1    1.41    0.14
  -1   1  -1   85.56    2.12
  -1   1  -1   85.63    2.08
  -1   1  -1   83.11    2.10
  -1   1  -1   88.70    2.17
   1  -1   1   83.71    2.07
   1  -1   1   87.12    1.96
   1  -1   1   85.87    2.16
   1  -1   1   86.89    2.11
   1  -1   1   87.07    2.13
  -2   1  -1    0.92    0.27
  -2   1  -1    1.25    0.15
  -2   1  -1    1.26    0.35
  -2   1  -1    1.77    0.30
  -2   1  -1    1.78    0.28
   2  -1   1    1.66    0.18
   2  -1   1    1.35    0.28
   2  -1   1    1.46    0.35
   2  -1   1    1.53    0.28
   2  -1   1    1.15    0.30
  -3   1  -1    9.14    0.43
  -3   1  -1    9.61    0.85
  -3   1  -1    9.91    0.70
  -3   1  -1    8.34    0.73
  -3   1  -1    8.56    0.65
   3  -1   1   10.19    0.74
   3  -1   1    9.31    0.77
   3  -1   1    9.04    0.80
   3  -1   1    8.57    0.43
  -4   1  -1    0.08    0.64
  -4   1  -1    0.02    0.45
  -4   1  -1   -0.45    0.21
  -4   1  -1   -0.19    0.41
  -4   1  -1    0.04    0.51
  -4   1  -1    0.10    0.51
   4  -1   1    0.04    0.23
   4  -1   1   -0.60    0.39
   4  -1   1    0.62    0.47
   4  -1   1    0.09    0.58
   4  -1   1   -0.32    0.49
  -5   1  -1    1.14    0.71
  -5   1  -1    0.64    0.33
  -5   1  -1    0.22    0.66
  -5   1  -1   -0.08    0.57
  -5   1  -1    1.99    0.99
  -5   1  -1    0.64    0.61
   5  -1   1   -0.65    0.88
   5  -1   1    2.07    0.75
   5  -1   1    1.11    0.73
   5  -1   1    1.85    0.79
   5  -1   1    0.82    0.37
   5  -1   1    0.98    0.63
  -6   1  -1    3.87    0.53
  -6   1  -1    2.47    0.90
  -6   1  -1    4.42    0.99
  -6   1  -1    2.64    1.16
   6  -1   1    2.58    0.98
   6  -1   1    3.31    1.29
   6  -1   1    4.63    1.17
   6  -1   1    0.71    1.01
  -7   1  -1    0.70    1.14
  -7   1  -1    2.00    1.41
  -7   1  -1   -0.25    1.29
   7  -1   1   -1.17    1.47
   7  -1   1   -1.13    1.34
   7  -1   1    0.18    1.47
   7  -1   1    1.18    1.23
  -8   1  -1   -3.75    1.83
  -8   1  -1    4.49    1.74
  -8   1  -1   -0.48    1.47
   8  -1   1    0.63    1.89
   8  -1   1    0.77    1.96
   8   0  -1   -3.34    1.83
   8   0  -1   -1.46    1.94
  -8   0   1    1.69    1.60
  -8   0   1    2.34    1.65
  -8   0   1   -1.75    1.57
   7   0  -1   -1.26    1.22
   7   0  -1   -0.16    1.16
   7   0  -1   -0.54    1.18
  -7   0   1   -0.61    1.06
  -7   0   1   -1.42    1.32
  -7   0   1    1.63    1.24
   6   0  -1    0.21    0.96
   6   0  -1   -1.78    0.71
   6   0  -1    0.30    0.93
   6   0  -1    0.44    0.96
  -6   0   1    1.16    1.42
  -6   0   1   -0.37    0.72
  -6   0   1   -1.22    0.88
  -6   0   1    1.05    0.51
  -6   0   1   -1.30    0.87
   5   0  -1    7.58    1.07
   5   0  -1    7.01    0.79
   5   0  -1    6.78    0.95
   5   0  -1    6.82    1.00
   5   0  -1    7.76    0.97
  -5   0   1    6.61    0.88
  -5   0   1    5.49    0.85
  -5   0   1    7.07    0.92
  -5   0   1    8.04    1.23
  -5   0   1    7.04    1.10
  -5   0   1    4.77    0.96
  -5   0   1    6.92    0.71
   4   0  -1    0.57    0.42
   4   0  -1    0.77    0.47
   4   0  -1    0.28    0.29
   4   0  -1   -0.60    0.48
   4   0  -1   -0.16    0.44
   4   0  -1   -0.18    0.53
  -4   0   1    0.01    0.46
  -4   0   1   -0.62    0.40
  -4   0   1   -0.36    0.50
  -4   0   1   -0.01    0.25
  -4   0   1    0.19    0.50
  -4   0   1   -0.32    0.38
  -4   0   1   -0.31    0.48
   3   0  -1  104.02    2.85
   3   0  -1  103.22    2.59
   3   0  -1  101.11    2.98
   3   0  -1  102.22    2.81
   3   0  -1  104.04    2.63
   3   0  -1  103.80    2.85
  -3   0   1  107.56    2.94
  -3   0   1  105.46    2.87
  -3   0   1  104.86    2.87
  -3   0   1  104.24    2.76
  -3   0   1  105.85    2.90
  -3   0   1  100.03    2.56
  -3   0   1  105.72    2.99
   2   0  -1   -0.10    0.12
   2   0  -1    0.20    0.19
   2   0  -1   -0.09    0.21
   2   0  -1   -0.08    0.21
   2   0  -1    0.01    0.08
   2   0  -1   -0.02    0.20
   2   0  -1   -0.03    0.15
  -2   0   1   -0.23    0.21
  -2   0   1    0.08    0.22
  -2   0   1    0.01    0.11
  -2   0   1    0.10    0.21
  -2   0   1   -0.08    0.08
  -2   0   1    0.34    0.24
  -2   0   1   -0.05    0.15
   1   0  -1  291.22    6.40
   1   0  -1  288.29    6.35
   1   0  -1  283.04    6.47
   1   0  -1  284.96    6.47
   1   0  -1  286.90    6.36
   1   0  -1  295.68    6.55
   1   0  -1  294.30    6.45
  -1   0   1  293.65    6.54
  -1   0   1  282.28    6.44
  -1   0   1  294.31    6.40
  -1   0   1  289.98    6.47
  -1   0   1  293.03    6.48
  -1   0   1  289.64    6.38
  -1   0   1  286.02    6.36
  -1   0   1  286.73    6.43
  -1   0  -1  913.90   20.51
  -1   0  -1  920.21   20.51
  -1   0  -1  921.18   20.58
  -1   0  -1  978.96   20.62
  -1   0  -1 1000.00   21.09
   1   0   1  887.19   20.57
   1   0   1  952.37   20.55
   1   0   1  924.23   20.51
   1   0   1  955.24   20.91
   1   0   1  947.71   20.76
   1   0   1  925.58   20.75
  -2   0  -1   -0.05    0.28
  -2   0  -1   -0.05    0.20
  -2   0  -1    0.20    0.14
  -2   0  -1   -0.17    0.22
  -2   0  -1   -0.21    0.20
   2   0   1   -0.41    0.19
   2   0   1   -0.17    0.26
   2   0   1   -0.27    0.21
   2   0   1   -0.14    0.12
  -3   0  -1    6.78    0.70
  -3   0  -1    6.35    0.58
  -3   0  -1    7.20    0.46
  -3   0  -1    7.25    0.67
  -3   0  -1    7.45    0.61
  -3   0  -1    5.91    0.61
  -3   0  -1    7.14    0.75
   3   0   1    6.76    0.74
   3   0   1    7.19    0.61
   3   0   1    6.95    0.70
   3   0   1    6.63    0.55
   3   0   1    6.29    0.48
  -4   0  -1    0.26    0.43
  -4   0  -1    0.39    0.44
  -4   0  -1   -0.35    0.31
  -4   0  -1    0.69    0.70
  -4   0  -1    0.09    0.53
  -4   0  -1    0.26    0.28
  -4   0  -1   -0.09    0.45
   4   0   1    0.27    0.46
   4   0   1    0.09    0.44
   4   0   1    0.33    0.44
   4   0   1   -0.28    0.58
   4   0   1   -0.06    0.30
  -5   0  -1   19.28    1.30
  -5   0  -1   24.01    1.45
  -5   0  -1   22.44    1.18
  -5   0  -1   18.58    1.44
  -5   0  -1   23.29    1.85
  -5   0  -1   19.27    1.41
   5   0   1   21.78    1.54
   5   0   1   20.99    1.05
   5   0   1   21.54    1.59
   5   0   1   20.31    1.27
   5   0   1   22.55    1.49
  -6   0  -1   -0.55    0.79
  -6   0  -1   -0.69    0.78
  -6   0  -1   -0.98    0.51
   6   0   1   -1.12    1.09
   6   0   1   -0.15    0.55
   6   0   1   -1.07    0.96
   6   0   1    0.34    0.88
  -7   0  -1    3.04    1.16
  -7   0  -1    2.56    1.36
  -7   0  -1    2.68    1.32
   7   0   1    3.18    1.50
   7   0   1    1.77    1.30
   7   0   1    1.30    1.56
  -8   0  -1    3.08    1.91
  -8   0  -1   -0.73    1.50
  -8   0  -1   -2.00    1.72
   8   0   1   -1.41    1.89
   8   0   1   -0.08    1.83
   8  -1  -1   -0.31    1.67
   8  -1  -1    0.13    1.95
  -8   1   1    3.84    1.61
  -8   1   1    0.97    1.71
  -8   1   1   -2.02    1.66
   7  -1  -1    2.99    1.30
   7  -1  -1    2.99    1.28
   7  -1  -1    5.13    1.64
  -7   1   1    3.53    1.21
  -7   1   1    5.31    1.28
  -7   1   1    4.28    1.38
   6  -1  -1    0.13    0.85
   6  -1  -1    0.60    0.77
   6  -1  -1   -1.13    0.95
   6  -1  -1   -0.14    0.95
  -6   1   1   -2.80    1.29
  -6   1   1    0.07    0.81
  -6   1   1   -0.37    0.39
  -6   1   1   -0.86    0.85
  -6   1   1   -0.54    0.89
   5  -1  -1    8.60    1.11
   5  -1  -1    7.41    1.11
   5  -1  -1    8.45    0.88
   5  -1  -1    7.84    0.98
   5  -1  -1    8.11    0.99
  -5   1   1    9.10    1.05
  -5   1   1    7.70    1.03
  -5   1   1    8.57    0.97
  -5   1   1    7.87    1.11
  -5   1   1    8.74    0.58
  -5   1   1    7.35    0.89
  -5   1   1    7.50    0.97
   4  -1  -1    0.64    0.50
   4  -1  -1    0.91    0.54
   4  -1  -1    0.28    0.39
   4  -1  -1    0.25    0.49
   4  -1  -1    0.42    0.44
  -4   1   1   -0.42    0.43
  -4   1   1    0.45    0.23
  -4   1   1    0.44    0.15
  -4   1   1    0.30    0.49
  -4   1   1    0.21    0.55
  -4   1   1    1.22    0.46
  -4   1   1    0.17    0.46
  -4   1   1   -0.06    0.44
   3  -1  -1   31.42    1.39
   3  -1  -1   33.00    1.26
   3  -1  -1   29.68    1.14
   3  -1  -1   32.06    1.19
   3  -1  -1   30.91    1.05
  -3   1   1   30.01    1.21
  -3   1   1   30.62    0.85
  -3   1   1   29.59    1.21
  -3   1   1   32.73    1.34
  -3   1   1   32.10    1.28
  -3   1   1   31.41    1.26
  -3   1   1   31.28    0.88
  -3   1   1   31.67    1.14
   2  -1  -1    3.56    0.37
   2  -1  -1    3.71    0.29
   2  -1  -1    3.51    0.43
   2  -1  -1    3.61    0.41
   2  -1  -1    3.00    0.36
   2  -1  -1    4.55    0.36
  -2   1   1    3.77    0.24
  -2   1   1    4.12    0.44
  -2   1   1    4.02    0.31
  -2   1   1    3.69    0.20
  -2   1   1    3.76    0.40
  -2   1   1    3.84    0.42
  -2   1   1    3.67    0.35
   1  -1  -1  203.14    4.72
   1  -1  -1  214.19    4.77
   1  -1  -1  205.92    4.65
   1  -1  -1  213.51    4.79
  -1   1   1  206.53    4.60
  -1   1   1  207.86    4.55
  -1   1   1  201.35    4.74
  -1   1   1  202.63    4.72
  -1   1   1  201.51    4.65
  -1   1   1  208.62    4.77
  -1   1   1  204.68    4.58
  -1   1   1  210.53    4.64
   0   1   1   -0.21    0.11
  -1  -1  -1   85.94    2.17
  -1  -1  -1   87.02    2.08
  -1  -1  -1   89.71    2.12
  -1  -1  -1   84.65    2.24
  -1  -1  -1   86.48    2.15
  -1  -1  -1   88.77    2.08
   1   1   1   87.06    2.25
   1   1   1   87.70    2.08
   1   1   1   90.12    2.17
   1   1   1   86.17    2.15
   1   1   1   87.23    2.09
   1   1   1   87.14    2.12
  -2  -1  -1    1.50    0.30
  -2  -1  -1    1.54    0.29
  -2  -1  -1    1.95    0.32
  -2  -1  -1    1.88    0.34
  -2  -1  -1    1.65    0.34
  -2  -1  -1    1.48    0.25
   2   1   1    1.51    0.30
   2   1   1    1.52    0.30
   2   1   1    1.85    0.31
   2   1   1    1.45    0.23
   2   1   1    1.85    0.41
   2   1   1    1.40    0.14
  -3  -1  -1    9.27    0.56
  -3  -1  -1    9.62    0.74
  -3  -1  -1    9.27    0.71
  -3  -1  -1    8.46    0.71
  -3  -1  -1    8.73    0.85
  -3  -1  -1    8.03    0.66
   3   1   1    8.25    0.71
   3   1   1    8.52    0.60
   3   1   1    8.78    0.69
   3   1   1    8.06    0.83
   3   1   1    8.67    0.65
  -4  -1  -1    0.33    0.66
  -4  -1  -1   -0.37    0.44
  -4  -1  -1    0.18    0.38
  -4  -1  -1    0.93    0.53
  -4  -1  -1   -0.57    0.46
  -4  -1  -1   -0.19    0.41
   4   1   1   -0.60    0.44
   4   1   1    0.14    0.37
   4   1   1    0.31    0.44
   4   1   1    0.35    0.62
  -5  -1  -1    0.92    0.74
  -5  -1  -1    0.30    0.97
  -5  -1  -1    1.20    0.74
  -5  -1  -1    1.47    0.70
  -5  -1  -1    0.79    0.47
  -5  -1  -1    0.85    0.74
  -5  -1  -1    2.56    0.63
   5   1   1    0.80    0.49
   5   1   1    0.95    0.61
   5   1   1    1.68    0.75
   5   1   1    1.08    0.73
   5   1   1    1.19    0.86
  -6  -1  -1    2.09    1.04
  -6  -1  -1    4.19    1.33
  -6  -1  -1    3.47    0.91
  -6  -1  -1    4.49    0.75
   6   1   1    2.95    1.16
   6   1   1    3.94    0.76
   6   1   1    6.29    1.11
   6   1   1    1.74    1.27
   6   1   1    4.72    1.20
  -7  -1  -1   -2.22    1.14
  -7  -1  -1    0.51    1.21
  -7  -1  -1   -0.36    1.32
   7   1   1   -1.58    1.25
   7   1   1    0.19    1.42
   7   1   1    0.44    0.85
   7   1   1    2.29    1.66
  -8  -1  -1    3.46    1.57
  -8  -1  -1   -0.10    1.50
  -8  -1  -1   -0.34    1.82
   8   1   1    1.30    1.90
   8   1   1    0.04    1.88
   8  -2  -1   -3.49    1.72
   8  -2  -1   -0.73    2.13
  -8   2   1    0.36    1.65
  -8   2   1    0.49    1.55
  -8   2   1   -0.48    1.79
   7  -2  -1   -1.15    1.20
   7  -2  -1    0.69    1.55
  -7   2   1   -0.75    1.04
  -7   2   1   -1.18    1.17
  -7   2   1    0.58    1.28
   6  -2  -1    8.10    1.08
   6  -2  -1    8.17    1.21
   6  -2  -1    4.94    1.28
   6  -2  -1    6.60    0.92
  -6   2   1    5.72    1.50
  -6   2   1    8.28    1.13
  -6   2   1    6.97    1.15
  -6   2   1    8.95    1.17
   5  -2  -1    4.02    0.66
   5  -2  -1    4.17    0.79
   5  -2  -1    3.52    0.89
   5  -2  -1    4.79    0.84
   5  -2  -1    5.09    0.97
  -5   2   1    3.23    0.79
  -5   2   1    2.99    0.86
  -5   2   1    4.00    0.32
  -5   2   1    4.27    1.05
  -5   2   1    3.78    0.27
  -5   2   1    3.62    0.77
  -5   2   1    4.28    0.89
  -5   2   1    4.47    0.82
   4  -2  -1   24.36    1.04
   4  -2  -1   24.12    1.31
   4  -2  -1   22.07    1.19
   4  -2  -1   24.22    1.45
   4  -2  -1   25.03    1.17
  -4   2   1   24.50    1.18
  -4   2   1   24.04    1.32
  -4   2   1   22.82    0.61
  -4   2   1   22.16    1.26
  -4   2   1   23.06    0.78
  -4   2   1   24.34    1.28
  -4   2   1   20.96    1.39
   3  -2  -1   17.16    0.78
   3  -2  -1   14.57    0.96
   3  -2  -1   16.77    0.82
   3  -2  -1   16.25    0.90
   3  -2  -1   15.66    0.71
   3  -2  -1   15.88    0.93
  -3   2   1   16.37    0.93
  -3   2   1   14.21    0.86
  -3   2   1   14.99    0.91
  -3   2   1   16.90    0.95
  -3   2   1   15.55    0.62
  -3   2   1   15.31    0.78
   2  -2  -1  172.71    4.28
   2  -2  -1  171.22    4.30
   2  -2  -1  171.21    4.04
   2  -2  -1  182.43    4.41
   2  -2  -1  168.11    4.08
   2  -2  -1  174.42    4.06
  -2   2   1  181.69    4.32
  -2   2   1  173.08    4.29
  -2   2   1  170.93    4.16
  -2   2   1  180.84    4.38
  -2   2   1  180.26    4.12
   1  -2  -1  445.95    9.69
   1  -2  -1  450.90    9.72
   1  -2  -1  439.09    9.67
   1  -2  -1  426.15    9.87
   1  -2  -1  434.23    9.70
   1  -2  -1  441.41    9.87
  -1   2   1  432.71    9.75
  -1   2   1  438.79    9.65
  -1   2   1  446.63    9.91
  -1   2   1  440.45    9.74
  -1   2   1  457.18    9.90
  -1   2   1  441.26    9.87
  -1   2   1  433.68    9.85
  -1   2   1  437.25    9.68
   0  -2  -1   79.33    1.97
   0  -2  -1   81.17    1.98
   0  -2  -1   77.72    1.86
   0  -2  -1   74.22    1.93
   0  -2  -1   78.98    1.93
   0   2   1   78.98    1.93
   0   2   1   79.52    1.87
   0   2   1   79.20    1.95
   0   2   1   79.13    1.96
   0   2   1   77.69    1.99
  -1  -2  -1    2.07    0.19
  -1  -2  -1    2.42    0.36
  -1  -2  -1    1.75    0.27
  -1  -2  -1    2.27    0.26
  -1  -2  -1    2.29    0.22
  -1  -2  -1    2.08    0.24
  -1  -2  -1    1.93    0.27
   1   2   1    1.98    0.25
   1   2   1    1.86    0.25
   1   2   1    1.85    0.22
   1   2   1    1.88    0.24
   1   2   1    1.86    0.35
   1   2   1    1.81    0.18
  -2  -2  -1  140.22    3.53
  -2  -2  -1  137.40    3.40
  -2  -2  -1  141.19    3.40
  -2  -2  -1  138.71    3.42
  -2  -2  -1  138.90    3.67
  -2  -2  -1  139.80    3.49
   2   2   1  134.71    3.43
   2   2   1  136.40    3.47
   2   2   1  135.83    3.48
   2   2   1  135.79    3.66
   2   2   1  139.66    3.40
  -3  -2  -1   38.88    1.45
  -3  -2  -1   38.42    1.49
  -3  -2  -1   38.80    1.39
  -3  -2  -1   33.71    1.50
  -3  -2  -1   41.19    1.66
   3   2   1   38.18    1.43
   3   2   1   36.85    1.33
   3   2   1   39.52    1.44
   3   2   1   37.31    1.36
   3   2   1   39.61    1.66
   3   2   1   37.02    1.44
  -4  -2  -1   30.29    1.41
  -4  -2  -1   32.31    1.55
  -4  -2  -1   31.87    1.50
  -4  -2  -1   31.56    1.54
  -4  -2  -1   34.25    1.32
  -4  -2  -1   32.53    1.74
   4   2   1   32.71    1.78
   4   2   1   32.64    1.53
   4   2   1   33.39    1.51
   4   2   1   33.41    1.38
   4   2   1   32.27    1.43
  -5  -2  -1    1.73    0.84
  -5  -2  -1    1.52    0.64
  -5  -2  -1    2.50    1.16
  -5  -2  -1    0.27    0.59
  -5  -2  -1    1.56    0.56
  -5  -2  -1    1.92    0.80
   5   2   1    1.13    0.70
   5   2   1    1.32    0.69
   5   2   1    1.09    0.76
   5   2   1    0.16    1.02
   5   2   1    1.45    0.61
  -6  -2  -1   11.02    1.22
  -6  -2  -1   10.02    1.23
  -6  -2  -1    8.61    1.23
  -6  -2  -1    7.65    1.29
   6   2   1    8.58    1.53
   6   2   1    8.29    1.27
   6   2   1    8.12    1.24
   6   2   1    7.37    1.01
   6   2   1    9.06    1.33
  -7  -2  -1    2.00    1.21
  -7  -2  -1    4.01    1.27
  -7  -2  -1    1.72    1.40
   7   2   1    1.09    1.82
   7   2   1    1.75    1.34
   7   2   1    1.61    1.33
   7   2   1    2.18    1.01
  -8  -2  -1    0.79    2.07
  -8  -2  -1    1.24    1.74
  -8  -2  -1    2.00    1.77
   8   2   1    0.87    2.11
   8   2   1   -3.27    1.74
   8  -3  -1    2.22    1.85
   8  -3  -1    1.82    2.29
  -8   3   1    2.89    1.87
  -8   3   1    1.81    1.73
  -8   3   1   -0.51    1.66
   7  -3  -1   -0.08    1.61
   7  -3  -1    0.22    1.35
  -7   3   1   -0.36    1.10
  -7   3   1   -0.60    1.16
  -7   3   1   -0.78    1.09
   6  -3  -1    8.15    1.03
   6  -3  -1    7.68    1.06
   6  -3  -1    9.54    1.54
  -6   3   1    7.12    1.13
  -6   3   1    6.84    1.16
  -6   3   1    7.29    1.21
  -6   3   1    9.41    1.48
   5  -3  -1    9.66    0.92
   5  -3  -1   11.06    1.34
   5  -3  -1    9.90    0.98
   5  -3  -1   10.97    1.09
  -5   3   1   11.54    1.20
  -5   3   1    9.95    0.63
  -5   3   1   10.14    1.17
  -5   3   1   13.23    1.45
  -5   3   1    9.72    1.09
   4  -3  -1    2.64    0.68
   4  -3  -1    1.92    0.62
   4  -3  -1    1.94    0.63
   4  -3  -1    2.23    0.48
   4  -3  -1    1.91    0.45
  -4   3   1    1.48    0.65
  -4   3   1    1.48    0.34
  -4   3   1    1.69    0.60
  -4   3   1    1.93    0.57
  -4   3   1    1.99    0.54
   3  -3  -1   40.22    1.30
   3  -3  -1   40.69    1.57
   3  -3  -1   40.50    1.28
   3  -3  -1   39.33    1.65
   3  -3  -1   42.62    1.59
   3  -3  -1   41.08    1.33
  -3   3   1   40.84    1.57
  -3   3   1   38.23    1.56
  -3   3   1   40.33    1.50
  -3   3   1   39.34    1.39
  -3   3   1   41.13    1.56
   2  -3  -1   33.07    1.00
   2  -3  -1   38.35    1.31
   2  -3  -1   35.29    0.85
   2  -3  -1   34.36    1.07
   2  -3  -1   35.05    1.07
   2  -3  -1   34.71    1.28
   2  -3  -1   34.42    1.32
  -2   3   1   34.72    0.85
  -2   3   1   34.46    1.29
  -2   3   1   35.47    1.16
  -2   3   1   34.29    1.29
  -2   3   1   34.89    1.01
  -2   3   1   35.75    1.19
   1  -3  -1    0.05    0.11
   1  -3  -1    0.01    0.19
   1  -3  -1   -0.01    0.19
   1  -3  -1   -0.09    0.21
   1  -3  -1   -0.07    0.18
  -1   3   1   -0.14    0.09
  -1   3   1   -0.31    0.21
  -1   3   1   -0.04    0.12
  -1   3   1    0.20    0.19
  -1   3   1   -0.13    0.19
  -1   3   1    0.09    0.22
   0  -3  -1    7.65    0.38
   0  -3  -1    7.50    0.46
   0  -3  -1    7.63    0.42
   0  -3  -1    7.83    0.50
   0  -3  -1    7.98    0.46
   0   3   1    8.58    0.57
   0   3   1    8.27    0.51
   0   3   1    8.68    0.45
   0   3   1    7.81    0.47
   0   3   1    7.97    0.39
  -1  -3  -1   55.22    1.55
  -1  -3  -1   53.05    1.30
  -1  -3  -1   50.70    1.44
  -1  -3  -1   51.62    1.58
  -1  -3  -1   50.86    1.43
  -1  -3  -1   50.67    1.52
  -1  -3  -1   52.26    1.67
   1   3   1   52.01    1.56
   1   3   1   52.22    1.43
   1   3   1   49.48    1.67
   1   3   1   50.12    1.50
   1   3   1   52.32    1.42
   1   3   1   51.23    1.54
  -2  -3  -1  103.19    2.91
  -2  -3  -1  104.01    2.75
  -2  -3  -1  107.06    3.06
  -2  -3  -1  103.17    2.84
  -2  -3  -1  108.95    2.70
   2   3   1  106.11    2.70
   2   3   1  108.00    2.85
   2   3   1  111.80    2.90
   2   3   1  103.53    2.84
   2   3   1  108.42    2.75
   2   3   1  107.18    3.10
  -3  -3  -1   10.19    0.83
  -3  -3  -1   12.38    1.10
  -3  -3  -1   10.99    0.91
  -3  -3  -1   12.53    0.79
  -3  -3  -1   11.91    0.79
  -3  -3  -1   12.26    0.78
   3   3   1   10.47    1.08
   3   3   1   12.86    0.86
   3   3   1   10.34    0.80
   3   3   1   12.06    0.75
   3   3   1   12.24    0.81
   3   3   1   10.21    0.78
  -4  -3  -1   12.73    1.06
  -4  -3  -1   10.86    1.11
  -4  -3  -1   13.68    1.37
  -4  -3  -1   11.51    0.95
  -4  -3  -1   10.62    0.89
  -4  -3  -1   10.63    1.02
   4   3   1   11.09    1.01
   4   3   1   13.56    0.99
   4   3   1   12.07    1.03
   4   3   1   11.42    1.28
   4   3   1   11.95    0.99
   4   3   1   13.15    1.04
  -5  -3  -1    1.91    0.65
  -5  -3  -1    3.52    0.78
  -5  -3  -1    2.46    0.78
  -5  -3  -1    2.19    0.86
  -5  -3  -1    2.32    1.18
  -5  -3  -1    2.19    0.87
   5   3   1    1.21    0.81
   5   3   1    1.87    0.65
   5   3   1    1.53    1.19
   5   3   1    1.47    0.71
   5   3   1    2.34    0.93
  -6  -3  -1    0.62    1.12
  -6  -3  -1    1.80    0.88
  -6  -3  -1    0.19    0.84
  -6  -3  -1    0.23    0.93
   6   3   1    1.16    1.36
   6   3   1    1.69    0.98
   6   3   1    1.69    1.00
   6   3   1    0.67    0.83
  -7  -3  -1    1.68    1.51
  -7  -3  -1    0.58    1.24
  -7  -3  -1   -0.75    1.19
   7   3   1    1.51    1.41
   7   3   1    2.01    1.43
   7   3   1   -0.44    1.07
  -8  -3  -1    3.78    1.68
  -8  -3  -1    0.70    1.99
  -8  -3  -1   -2.70    1.73
   8   3   1   -2.34    2.41
   8   3   1   -2.51    1.89
   8   3   1   -1.79    1.80
  -8   4   1   -0.83    1.81
   7  -4  -1    0.15    1.20
   7  -4  -1   -3.24    1.46
  -7   4   1    0.64    1.30
  -7   4   1    2.22    1.34
  -7   4   1   -0.21    1.23
   6  -4  -1   23.01    1.74
   6  -4  -1   24.28    2.17
   6  -4  -1   18.29    1.16
  -6   4   1   17.16    0.87
  -6   4   1   21.73    1.76
  -6   4   1   16.20    1.73
  -6   4   1   15.85    1.59
  -6   4   1   18.33    1.96
   5  -4  -1    2.10    0.65
   5  -4  -1    2.16    0.94
   5  -4  -1    2.01    0.59
  -5   4   1    3.34    0.77
  -5   4   1    1.93    1.04
  -5   4   1    3.18    0.50
  -5   4   1    1.94    0.76
   4  -4  -1    2.59    0.49
   4  -4  -1    2.58    0.66
   4  -4  -1    2.18    0.73
   4  -4  -1    2.19    0.58
   4  -4  -1    3.11    0.54
  -4   4   1    3.71    0.72
  -4   4   1    1.46    0.48
  -4   4   1    2.95    0.59
  -4   4   1    1.98    0.63
  -4   4   1    2.42    0.74
   3  -4  -1    7.12    0.65
   3  -4  -1    6.70    0.63
   3  -4  -1    6.55    0.59
   3  -4  -1    7.73    0.78
   3  -4  -1    5.08    0.71
   3  -4  -1    7.04    0.83
  -3   4   1    6.77    0.68
  -3   4   1    6.61    0.75
  -3   4   1    7.01    0.78
   2  -4  -1    0.08    0.26
   2  -4  -1    0.39    0.14
   2  -4  -1    0.42    0.36
   2  -4  -1    0.40    0.30
   2  -4  -1   -0.33    0.33
   2  -4  -1    0.25    0.14
  -2   4   1    0.07    0.32
  -2   4   1   -0.07    0.15
  -2   4   1   -0.02    0.32
  -2   4   1    0.45    0.15
  -2   4   1   -0.21    0.29
  -2   4   1    0.59    0.31
  -2   4   1    0.16    0.35
   1  -4  -1   67.10    1.85
   1  -4  -1   65.15    1.90
   1  -4  -1   68.38    1.77
   1  -4  -1   69.23    1.91
   1  -4  -1   66.24    1.97
  -1   4   1   70.02    1.98
  -1   4   1   66.98    1.62
  -1   4   1   67.75    2.00
  -1   4   1   64.66    2.15
  -1   4   1   67.28    1.93
  -1   4   1   68.14    1.85
  -1   4   1   67.29    1.78
   0  -4  -1    5.42    0.42
   0  -4  -1    5.17    0.47
   0  -4  -1    6.26    0.57
   0  -4  -1    5.23    0.40
   0  -4  -1    5.09    0.51
   0   4   1    5.42    0.61
   0   4   1    5.31    0.46
   0   4   1    4.43    0.37
   0   4   1    4.66    0.50
   0   4   1    4.77    0.45
  -1  -4  -1    0.43    0.23
  -1  -4  -1    0.16    0.29
  -1  -4  -1    0.66    0.24
  -1  -4  -1    0.28    0.38
  -1  -4  -1    0.32    0.31
  -1  -4  -1    0.54    0.15
   1   4   1    0.31    0.24
   1   4   1    0.44    0.25
   1   4   1    0.36    0.40
   1   4   1    0.12    0.23
   1   4   1    0.16    0.20
   1   4   1    0.27    0.28
  -2  -4  -1   28.70    0.99
  -2  -4  -1   28.72    1.28
  -2  -4  -1   29.58    1.22
  -2  -4  -1   27.44    1.09
  -2  -4  -1   31.25    1.46
  -2  -4  -1   31.63    1.20
  -2  -4  -1   29.24    1.09
   2   4   1   26.58    1.21
   2   4   1   29.46    1.22
   2   4   1   33.00    1.22
   2   4   1   30.05    1.48
   2   4   1   28.10    1.23
  -3  -4  -1    2.09    0.52
  -3  -4  -1    2.45    0.49
  -3  -4  -1    1.61    0.45
  -3  -4  -1    2.38    0.58
  -3  -4  -1    2.49    0.52
  -3  -4  -1    1.83    0.44
   3   4   1    1.66    0.49
   3   4   1    2.25    0.45
   3   4   1    2.18    0.48
   3   4   1    2.47    0.51
   3   4   1    2.53    0.78
   3   4   1    1.59    0.53
  -4  -4  -1    4.14    1.04
  -4  -4  -1    5.61    0.82
  -4  -4  -1    4.56    0.88
  -4  -4  -1    5.20    0.72
  -4  -4  -1    4.81    0.69
  -4  -4  -1    5.27    0.74
   4   4   1    6.05    0.81
   4   4   1    4.09    0.70
   4   4   1    4.46    0.81
   4   4   1    5.19    0.75
   4   4   1    5.78    0.84
   4   4   1    5.58    1.10
  -5  -4  -1   -0.85    0.77
  -5  -4  -1    0.72    0.69
  -5  -4  -1   -0.30    0.83
  -5  -4  -1   -0.14    0.66
  -5  -4  -1   -0.57    0.71
   5   4   1   -0.44    0.30
   5   4   1   -0.49    0.87
   5   4   1    0.22    0.63
   5   4   1    0.27    0.71
   5   4   1    0.06    1.09
  -6  -4  -1    5.20    1.16
  -6  -4  -1    4.83    1.05
  -6  -4  -1    3.64    1.27
  -6  -4  -1    2.74    1.13
   6   4   1    4.63    1.21
   6   4   1    5.77    1.68
   6   4   1    3.68    1.21
   6   4   1    3.23    0.97
  -7  -4  -1    1.60    1.47
  -7  -4  -1   -1.14    1.17
  -7  -4  -1   -1.61    1.27
   7   4   1   -1.30    1.38
   7   4   1   -0.64    1.27
   7   4   1   -0.18    2.26
   7   4   1   -0.89    1.81
   7  -5  -1    0.73    1.97
   7  -5  -1    0.89    1.23
  -7   5   1    0.51    1.33
  -7   5   1   -2.39    1.33
  -7   5   1   -0.38    1.28
   6  -5  -1   -2.35    1.09
   6  -5  -1    0.54    0.42
   6  -5  -1    0.73    0.86
  -6   5   1    0.17    0.90
  -6   5   1   -0.67    0.85
  -6   5   1    0.28    0.62
   5  -5  -1    1.71    0.86
   5  -5  -1    1.32    0.81
   5  -5  -1    2.20    0.59
   5  -5  -1    2.52    0.66
   5  -5  -1    2.41    1.23
  -5   5   1    1.23    0.78
  -5   5   1    1.26    1.11
  -5   5   1    2.96    1.60
  -5   5   1    0.94    0.59
   4  -5  -1    7.65    0.89
   4  -5  -1    6.53    0.70
   4  -5  -1    8.74    0.76
   4  -5  -1    8.40    1.09
   4  -5  -1    7.54    0.95
  -4   5   1    7.45    0.93
  -4   5   1    7.11    0.93
  -4   5   1    6.82    0.88
  -4   5   1    6.79    0.94
   3  -5  -1    0.59    0.55
   3  -5  -1    0.84    0.42
   3  -5  -1    0.45    0.23
   3  -5  -1    0.60    0.56
  -3   5   1    1.45    0.47
  -3   5   1    0.53    0.48
  -3   5   1    1.22    0.64
  -3   5   1   -0.97    0.44
  -3   5   1    0.79    0.53
   2  -5  -1    1.37    0.24
   2  -5  -1    1.20    0.45
   2  -5  -1    1.11    0.48
   2  -5  -1    1.60    0.42
   2  -5  -1    1.71    0.59
  -2   5   1    0.82    0.41
  -2   5   1    1.32    0.23
  -2   5   1    0.52    0.44
  -2   5   1    1.72    0.53
  -2   5   1    0.99    0.17
  -2   5   1    1.39    0.40
  -2   5   1    0.80    0.46
  -2   5   1    1.42    0.45
   1  -5  -1    8.43    0.54
   1  -5  -1    7.87    0.61
   1  -5  -1    6.83    0.70
   1  -5  -1    7.47    0.68
   1  -5  -1    6.92    0.64
  -1   5   1    5.94    0.64
  -1   5   1    7.06    0.51
  -1   5   1    6.90    0.63
  -1   5   1    7.48    0.66
  -1   5   1    7.73    0.78
  -1   5   1    8.16    0.58
   0  -5  -1    0.29    0.30
   0  -5  -1    0.59    0.34
   0  -5  -1    0.06    0.24
   0  -5  -1    0.28    0.33
   0  -5  -1    0.67    0.30
   0  -5  -1   -0.75    0.39
   0   5   1    0.46    0.27
   0   5   1    0.28    0.37
   0   5   1   -0.23    0.30
   0   5   1    0.07    0.26
   0   5   1    0.63    0.42
  -1  -5  -1    1.25    0.44
  -1  -5  -1    1.25    0.30
  -1  -5  -1    1.28    0.49
  -1  -5  -1    1.69    0.36
  -1  -5  -1    1.45    0.36
   1   5   1    1.34    0.33
   1   5   1    1.91    0.38
   1   5   1    1.90    0.39
   1   5   1    1.40    0.44
   1   5   1    1.66    0.59
   1   5   1    1.83    0.41
  -2  -5  -1   28.35    1.25
  -2  -5  -1   29.88    1.02
  -2  -5  -1   28.51    1.51
  -2  -5  -1   30.10    1.30
  -2  -5  -1   28.95    1.39
  -2  -5  -1   28.30    1.12
  -2  -5  -1   29.72    1.20
   2   5   1   27.20    1.56
   2   5   1   29.60    1.25
   2   5   1   31.32    1.35
   2   5   1   28.96    1.15
   2   5   1   31.89    1.37
  -3  -5  -1    0.43    0.50
  -3  -5  -1   -0.09    0.43
  -3  -5  -1    0.90    0.55
  -3  -5  -1    0.52    0.47
  -3  -5  -1    0.71    0.77
  -3  -5  -1    0.74    0.38
  -3  -5  -1    0.28    0.37
   3   5   1    0.51    0.41
   3   5   1    0.69    0.60
   3   5   1    0.80    0.45
   3   5   1    0.24    0.51
   3   5   1    0.75    0.58
  -4  -5  -1    5.05    0.81
  -4  -5  -1    5.27    0.75
  -4  -5  -1    3.81    0.75
  -4  -5  -1    3.08    0.86
  -4  -5  -1    3.11    1.16
  -4  -5  -1    3.96    0.80
   4   5   1    4.02    0.81
   4   5   1    3.74    1.18
   4   5   1    3.63    0.71
   4   5   1    5.03    0.79
   4   5   1    3.08    0.73
   4   5   1    5.05    0.90
  -5  -5  -1   23.61    1.64
  -5  -5  -1   23.86    1.57
  -5  -5  -1   24.72    1.74
  -5  -5  -1   21.53    1.55
   5   5   1   22.48    2.21
   5   5   1   22.83    1.64
   5   5   1   27.14    1.67
  -6  -5  -1    2.83    1.17
  -6  -5  -1    0.64    1.04
  -6  -5  -1    3.60    1.30
   6   5   1    2.78    0.41
   6   5   1    1.83    1.04
   6   5   1    1.75    0.33
   6   5   1    2.41    1.61
   6   5   1    3.77    1.17
   6   5   1    2.41    1.21
  -7  -5  -1    2.10    1.27
  -7  -5  -1    1.89    1.74
  -7  -5  -1    0.38    1.46
   7   5   1    2.73    1.52
   7   5   1    2.62    1.43
   7   5   1   -0.48    1.55
   7   5   1   -1.50    2.20
   7  -6  -1    2.18    2.00
  -7   6   1   -2.30    1.25
  -7   6   1    0.68    1.50
  -7   6   1   -3.81    1.41
   6  -6  -1    0.65    0.83
   6  -6  -1    0.70    1.36
  -6   6   1    0.68    1.08
  -6   6   1   -0.56    0.95
   5  -6  -1    0.27    0.59
   5  -6  -1   -0.14    0.84
   5  -6  -1    0.55    1.00
   5  -6  -1    0.57    0.54
   5  -6  -1    0.17    0.57
  -5   6   1    0.47    0.76
  -5   6   1   -0.41    0.84
  -5   6   1   -0.29    0.68
  -5   6   1   -2.31    1.21
   4  -6  -1    1.15    0.37
   4  -6  -1    0.52    0.56
   4  -6  -1    0.91    0.80
   4  -6  -1    1.79    0.70
  -4   6   1    0.04    0.71
  -4   6   1    0.38    0.83
  -4   6   1    2.78    0.78
  -4   6   1    2.01    0.66
   3  -6  -1   10.75    0.93
   3  -6  -1    9.64    1.03
   3  -6  -1    8.25    0.88
   3  -6  -1    9.61    1.01
   3  -6  -1    9.63    0.47
  -3   6   1   11.96    1.08
  -3   6   1    9.53    1.02
  -3   6   1   10.59    1.01
  -3   6   1    7.85    0.89
  -3   6   1    9.68    1.10
   2  -6  -1   11.69    0.65
   2  -6  -1   10.62    0.90
   2  -6  -1   13.04    0.97
   2  -6  -1   13.49    1.01
   2  -6  -1   12.70    0.92
  -2   6   1   13.31    0.43
  -2   6   1   12.91    0.95
  -2   6   1   12.85    0.86
  -2   6   1   13.10    1.02
  -2   6   1   12.65    0.99
  -2   6   1   13.45    0.71
  -2   6   1   11.49    1.00
  -2   6   1   14.21    1.05
   1  -6  -1   19.13    1.03
   1  -6  -1   19.24    0.94
   1  -6  -1   18.80    1.03
   1  -6  -1   18.63    1.03
  -1   6   1   19.23    1.08
  -1   6   1   19.07    0.94
  -1   6   1   18.89    1.21
  -1   6   1   19.15    0.92
  -1   6   1   19.09    1.08
   0  -6  -1    6.61    0.60
   0  -6  -1    6.53    0.76
   0  -6  -1    7.32    0.63
   0  -6  -1    6.52    0.73
   0  -6  -1    6.96    0.75
   0  -6  -1    6.10    0.68
   0   6   1    5.06    0.58
   0   6   1    6.68    0.58
   0   6   1    7.30    0.75
   0   6   1    5.93    0.65
   0   6   1    5.83    0.82
  -1  -6  -1   15.07    1.18
  -1  -6  -1   17.08    0.95
  -1  -6  -1   14.93    1.06
  -1  -6  -1   15.28    0.86
  -1  -6  -1   16.83    0.87
   1   6   1   15.78    0.99
   1   6   1   14.57    1.17
   1   6   1   16.84    0.85
   1   6   1   15.52    0.93
   1   6   1   15.39    1.02
   1   6   1   14.41    0.92
  -2  -6  -1    9.63    1.04
  -2  -6  -1    9.17    0.85
  -2  -6  -1    8.69    0.74
  -2  -6  -1    8.84    0.73
  -2  -6  -1    8.42    0.58
  -2  -6  -1    8.20    0.94
   2   6   1    8.65    0.91
   2   6   1    8.04    0.87
   2   6   1    9.20    1.09
   2   6   1    8.54    0.73
   2   6   1   10.63    0.84
  -3  -6  -1    7.03    0.78
  -3  -6  -1    8.01    0.81
  -3  -6  -1    7.76    0.72
  -3  -6  -1    7.47    0.81
  -3  -6  -1    7.92    0.92
  -3  -6  -1    9.29    1.18
  -3  -6  -1    7.07    1.00
   3   6   1    7.70    0.89
   3   6   1    7.82    0.82
   3   6   1    8.06    1.22
   3   6   1    5.98    0.92
   3   6   1    8.43    0.94
  -4  -6  -1   14.64    1.14
  -4  -6  -1   14.19    1.10
  -4  -6  -1   13.93    1.44
  -4  -6  -1   12.68    1.27
  -4  -6  -1   11.80    1.09
  -4  -6  -1   14.72    1.35
   4   6   1   15.07    1.66
   4   6   1   11.37    1.20
   4   6   1   14.34    1.42
   4   6   1   14.30    1.35
   4   6   1   15.34    1.37
  -5  -6  -1    0.72    0.86
  -5  -6  -1   -0.34    0.71
  -5  -6  -1    0.23    0.73
  -5  -6  -1    0.68    0.85
  -5  -6  -1    0.02    0.95
   5   6   1   -0.44    0.85
   5   6   1    0.21    0.79
   5   6   1   -0.87    1.27
  -6  -6  -1   -1.10    1.02
  -6  -6  -1    1.18    1.34
  -6  -6  -1    2.38    1.51
  -6  -6  -1    2.28    1.14
   6   6   1   -1.24    1.00
   6   6   1   -1.30    0.98
   6   6   1    1.22    1.78
   6   6   1   -0.02    1.23
  -7  -6  -1   -1.27    1.45
  -7  -6  -1   -0.17    1.79
  -7  -6  -1    0.97    1.38
   7   6   1   -0.26    1.50
   7   6   1    2.65    1.61
   7   6   1    2.77    2.28
   7   6   1    0.30    1.53
   7  -7  -1    2.39    2.05
  -7   7   1    1.62    1.65
  -7   7   1    0.83    1.52
   6  -7  -1   -1.40    0.72
   6  -7  -1   -0.08    1.19
   6  -7  -1   -0.39    1.50
  -6   7   1   -1.22    1.15
  -6   7   1   -0.61    1.08
   5  -7  -1    4.03    1.25
   5  -7  -1    4.39    1.15
   5  -7  -1    3.71    0.57
   5  -7  -1    3.93    0.59
   5  -7  -1    4.82    0.64
  -5   7   1    3.01    1.13
  -5   7   1    3.79    0.94
  -5   7   1    4.13    1.32
  -5   7   1    6.35    1.23
   4  -7  -1   -0.10    0.85
   4  -7  -1   -0.13    0.71
   4  -7  -1    1.39    0.64
   4  -7  -1    0.51    0.84
  -4   7   1   -0.25    0.69
  -4   7   1   -0.56    0.97
  -4   7   1    0.29    0.68
   3  -7  -1    2.08    0.75
   3  -7  -1    1.33    0.33
   3  -7  -1    0.39    0.59
   3  -7  -1    1.08    0.70
  -3   7   1    1.08    0.76
  -3   7   1    2.45    0.88
  -3   7   1    1.15    0.67
  -3   7   1    0.81    0.67
  -3   7   1    2.84    0.74
  -3   7   1    2.58    0.89
   2  -7  -1    2.93    0.65
   2  -7  -1    1.32    0.58
   2  -7  -1    3.48    0.63
   2  -7  -1    2.63    0.43
   2  -7  -1    3.29    0.68
  -2   7   1    3.16    0.82
  -2   7   1    1.34    0.62
  -2   7   1    2.27    0.63
  -2   7   1    2.96    0.69
  -2   7   1    3.14    0.64
  -2   7   1    2.29    0.44
  -2   7   1    2.43    0.74
   1  -7  -1   21.08    1.25
   1  -7  -1   21.02    1.02
   1  -7  -1   21.01    1.20
   1  -7  -1   20.87    1.06
   1  -7  -1   19.99    1.33
  -1   7   1   21.48    1.08
  -1   7   1   23.01    1.29
  -1   7   1   18.72    1.30
  -1   7   1   20.15    1.04
  -1   7   1   19.38    1.19
   0  -7  -1    3.24    0.52
   0  -7  -1    2.37    0.68
   0  -7  -1    1.91    0.58
   0  -7  -1    2.92    0.50
   0  -7  -1    2.36    0.65
   0  -7  -1    2.41    0.58
   0   7   1    2.21    0.69
   0   7   1    3.00    0.59
   0   7   1    3.62    0.65
   0   7   1    2.70    0.50
   0   7   1    2.71    0.54
  -1  -7  -1    8.06    0.81
  -1  -7  -1    6.55    0.91
  -1  -7  -1    8.37    0.85
  -1  -7  -1    5.11    0.93
  -1  -7  -1    6.65    0.70
   1   7   1    7.19    1.04
   1   7   1    8.17    0.74
   1   7   1    7.38    0.74
   1   7   1    7.69    0.85
   1   7   1    6.80    0.90
   1   7   1    7.03    0.81
  -2  -7  -1    0.48    0.62
  -2  -7  -1    0.38    0.32
  -2  -7  -1    1.23    0.88
  -2  -7  -1    0.77    0.53
  -2  -7  -1    0.05    0.45
  -2  -7  -1    0.06    0.47
   2   7   1   -0.08    0.46
   2   7   1   -0.33    0.52
   2   7   1    1.06    0.79
   2   7   1    0.46    0.54
   2   7   1    0.12    0.51
  -3  -7  -1    3.84    0.55
  -3  -7  -1    3.15    0.68
  -3  -7  -1    2.60    0.82
  -3  -7  -1    3.83    0.69
  -3  -7  -1    2.77    1.16
  -3  -7  -1    2.98    0.67
   3   7   1    3.18    0.72
   3   7   1    3.23    0.75
   3   7   1    3.29    0.77
   3   7   1    2.70    0.88
   3   7   1    2.18    1.07
  -4  -7  -1    1.08    0.72
  -4  -7  -1   -0.07    0.60
  -4  -7  -1    0.45    0.73
  -4  -7  -1    1.28    0.67
  -4  -7  -1    1.28    0.96
   4   7   1    0.48    1.21
   4   7   1    1.20    0.79
   4   7   1    0.65    0.80
  -5  -7  -1   -1.16    0.81
  -5  -7  -1    0.54    0.78
  -5  -7  -1    1.31    0.95
  -5  -7  -1    1.03    1.13
  -5  -7  -1    0.17    0.97
   5   7   1    1.81    1.54
   5   7   1    0.70    0.86
  -6  -7  -1    0.22    1.11
  -6  -7  -1    3.24    1.22
  -6  -7  -1    2.91    1.47
  -6  -7  -1    1.50    1.30
   6   7   1    1.37    1.18
   6   7   1    2.06    1.35
   6   7   1    2.64    1.96
  -7  -7  -1   -1.62    1.58
  -7  -7  -1    0.29    1.59
  -7  -7  -1   -0.11    1.88
  -7  -7  -1   -2.56    1.37
   7   7   1   -1.10    1.69
   7   7   1    0.51    1.77
   7   7   1    4.48    2.78
   7  -8  -1    6.12    2.74
   6  -8  -1   -0.04    1.37
   6  -8  -1    1.10    1.60
  -6   8   1   -1.75    1.43
  -6   8   1   -0.53    1.30
   5  -8  -1    0.46    1.14
   5  -8  -1    1.19    1.06
  -5   8   1   -1.64    1.04
  -5   8   1    1.03    1.45
   4  -8  -1    5.06    0.79
   4  -8  -1    6.40    1.17
   4  -8  -1    7.03    1.22
  -4   8   1    7.27    1.26
  -4   8   1    6.61    1.29
  -4   8   1    4.25    1.07
   3  -8  -1    0.25    0.60
   3  -8  -1    1.93    0.72
   3  -8  -1    0.35    0.36
   3  -8  -1   -0.51    0.77
   3  -8  -1    0.21    0.75
  -3   8   1    0.89    1.02
  -3   8   1   -1.49    0.76
  -3   8   1   -0.53    0.69
  -3   8   1   -0.20    0.74
   2  -8  -1    2.65    0.80
   2  -8  -1    2.73    0.52
   2  -8  -1    3.03    0.76
   2  -8  -1    3.07    0.74
   2  -8  -1    2.92    0.84
  -2   8   1    2.41    0.74
  -2   8   1    2.47    0.86
  -2   8   1    3.43    0.87
  -2   8   1    2.08    0.72
  -2   8   1    1.46    0.49
  -2   8   1    2.86    0.88
   1  -8  -1   12.37    0.93
   1  -8  -1   14.59    1.20
   1  -8  -1   16.18    1.40
   1  -8  -1   14.52    1.21
   1  -8  -1   13.79    0.99
  -1   8   1   15.15    1.19
  -1   8   1   12.28    1.02
  -1   8   1   12.73    0.99
  -1   8   1   14.05    1.37
  -1   8   1   14.76    1.27
   0  -8  -1    0.58    0.54
   0  -8  -1    0.53    0.86
   0  -8  -1    0.43    0.47
   0  -8  -1    0.64    0.69
   0  -8  -1    0.10    0.57
   0  -8  -1   -0.28    0.54
   0   8   1   -0.17    0.65
   0   8   1    0.89    0.82
   0   8   1    0.12    0.51
   0   8   1    0.26    0.48
   0   8   1   -0.04    0.61
  -1  -8  -1    5.12    0.70
  -1  -8  -1    6.02    0.80
  -1  -8  -1    3.73    0.90
  -1  -8  -1    4.50    0.72
  -1  -8  -1    5.86    1.11
   1   8   1    4.55    0.80
   1   8   1    4.17    0.82
   1   8   1    6.32    0.81
   1   8   1    3.86    0.97
   1   8   1    6.29    0.77
   1   8   1    5.17    0.83
  -2  -8  -1   25.17    1.49
  -2  -8  -1   25.29    1.97
  -2  -8  -1   24.08    1.31
  -2  -8  -1   24.25    1.32
  -2  -8  -1   26.01    1.07
  -2  -8  -1   27.42    1.81
   2   8   1   26.22    1.35
   2   8   1   26.82    1.63
   2   8   1   24.75    1.54
   2   8   1   24.30    1.48
   2   8   1   24.17    1.89
  -3  -8  -1    1.39    0.50
  -3  -8  -1    1.03    0.91
  -3  -8  -1    0.50    0.68
  -3  -8  -1    1.03    0.62
   3   8   1   -0.49    1.05
   3   8   1    2.02    0.85
   3   8   1    2.00    0.80
   3   8   1    0.83    0.71
  -4  -8  -1   12.66    1.31
  -4  -8  -1   12.24    1.52
  -4  -8  -1   14.28    1.27
  -4  -8  -1   12.06    1.21
   4   8   1   12.53    1.40
   4   8   1   15.92    1.93
  -5  -8  -1    0.31    1.07
  -5  -8  -1    1.69    1.35
  -5  -8  -1   -1.55    1.00
  -5  -8  -1    0.56    0.99
  -5  -8  -1    1.61    0.93
   5   8   1    0.72    1.07
   5   8   1    0.33    1.76
  -6  -8  -1    0.08    1.09
  -6  -8  -1   -1.11    1.28
  -6  -8  -1    0.67    1.29
  -6  -8  -1   -0.24    1.73
   6   8   1    0.91    2.13
   6   8   1   -1.79    1.38
   6   8   1   -0.26    1.37
   6  -9  -1   -0.73    1.76
   6  -9  -1   -0.23    1.54
  -6   9   1   -1.93    1.60
  -6   9   1    1.13    1.55
   5  -9  -1    0.46    1.38
   5  -9  -1    1.15    1.24
  -5   9   1    1.65    1.17
  -5   9   1    0.52    1.24
   4  -9  -1    3.45    1.17
   4  -9  -1    6.50    1.29
   4  -9  -1    4.74    0.93
   4  -9  -1    4.63    0.48
   4  -9  -1    4.94    1.23
  -4   9   1    6.05    1.30
  -4   9   1    3.74    1.30
   3  -9  -1    8.72    1.15
   3  -9  -1   10.79    0.93
   3  -9  -1    8.57    1.03
   3  -9  -1    8.64    1.20
  -3   9   1    8.10    1.29
  -3   9   1    8.04    1.18
  -3   9   1    9.07    1.39
   2  -9  -1    3.98    0.68
   2  -9  -1    6.66    1.08
   2  -9  -1    3.82    0.86
   2  -9  -1    3.83    0.89
   2  -9  -1    4.24    0.82
  -2   9   1    4.32    1.10
  -2   9   1    2.98    1.08
  -2   9   1    3.86    1.14
  -2   9   1    3.60    0.86
  -2   9   1    4.02    0.70
  -2   9   1    2.32    0.77
   1  -9  -1    6.90    1.05
   1  -9  -1    6.62    0.92
   1  -9  -1    7.76    1.20
   1  -9  -1    5.19    0.75
   1  -9  -1    5.46    0.75
  -1   9   1    5.69    0.83
  -1   9   1    6.32    1.12
  -1   9   1    5.25    0.92
  -1   9   1    6.10    1.10
  -1   9   1    6.54    1.08
   0  -9  -1    4.20    0.98
   0  -9  -1    5.03    1.11
   0  -9  -1    5.31    0.86
   0  -9  -1    6.11    0.97
   0  -9  -1    6.42    0.85
   0  -9  -1    5.27    0.72
   0   9   1    6.02    0.82
   0   9   1    6.66    1.02
   0   9   1    4.47    1.00
   0   9   1    4.77    1.13
   0   9   1    6.26    0.83
  -1  -9  -1    0.10    0.63
  -1  -9  -1   -1.67    1.06
  -1  -9  -1    0.34    0.66
  -1  -9  -1    0.08    0.54
  -1  -9  -1    0.31    0.84
   1   9   1   -0.39    0.68
   1   9   1    0.29    0.62
   1   9   1    0.84    0.66
   1   9   1    0.15    0.71
   1   9   1   -0.67    0.98
   1   9   1    0.92    0.83
  -2  -9  -1    0.31    0.40
  -2  -9  -1    0.34    0.65
  -2  -9  -1   -0.87    0.89
  -2  -9  -1    0.91    0.71
   2   9   1    0.92    0.77
   2   9   1    1.74    0.77
   2   9   1    0.81    1.12
  -3  -9  -1    1.56    0.82
  -3  -9  -1    0.52    0.55
  -3  -9  -1    1.16    0.82
   3   9   1    2.45    1.42
   3   9   1   -0.74    0.93
   3   9   1    0.93    0.86
  -4  -9  -1   -0.37    0.83
  -4  -9  -1   -0.80    0.68
  -4  -9  -1    0.85    1.23
  -4  -9  -1   -0.78    0.94
   4   9   1   -0.05    1.62
   4   9   1   -0.62    0.94
  -5  -9  -1   -0.51    1.05
  -5  -9  -1    0.10    1.49
  -5  -9  -1    0.37    1.04
   5   9   1    1.13    1.93
   5   9   1   -1.00    1.33
  -6  -9  -1    0.43    1.41
  -6  -9  -1    0.76    1.76
  -6  -9  -1    1.31    1.90
   6   9   1   -0.94    1.50
   6   9   1    0.68    2.67
   6   9   1   -0.41    1.53
   6 -10  -1    1.19    1.99
   6 -10  -1    2.92    1.79
  -6  10   1    1.59    2.02
  -6  10   1    2.63    1.73
   5 -10  -1    2.35    1.51
   5 -10  -1    0.24    1.31
  -5  10   1    2.10    1.40
  -5  10   1    3.36    1.39
   4 -10  -1   -0.90    1.10
   4 -10  -1    1.77    1.21
   4 -10  -1    0.75    0.92
  -4  10   1    2.75    1.25
  -4  10   1    0.85    1.20
   3 -10  -1    1.63    1.15
   3 -10  -1   -0.58    0.92
   3 -10  -1   -0.36    0.98
   3 -10  -1    2.45    0.70
   3 -10  -1    2.83    1.24
  -3  10   1    2.30    1.27
  -3  10   1    2.15    0.94
   2 -10  -1    5.68    1.12
   2 -10  -1    6.10    1.30
   2 -10  -1    5.01    0.82
   2 -10  -1    5.02    0.99
   2 -10  -1    5.26    1.08
  -2  10   1    6.00    1.55
  -2  10   1    4.10    0.85
  -2  10   1    4.18    1.04
  -2  10   1    4.20    1.18
   1 -10  -1    3.65    0.95
   1 -10  -1    3.03    0.83
   1 -10  -1    1.22    0.68
   1 -10  -1    2.82    0.96
   1 -10  -1    2.64    1.22
  -1  10   1    0.50    1.07
  -1  10   1    3.24    0.89
  -1  10   1    2.26    1.02
  -1  10   1    1.53    0.71
  -1  10   1    2.26    1.08
   0 -10  -1    1.26    0.65
   0 -10  -1    2.96    1.22
   0 -10  -1    1.98    0.89
   0 -10  -1    2.41    0.92
   0 -10  -1    1.85    0.92
   0  10   1    1.75    1.09
   0  10   1    3.01    0.87
   0  10   1    1.47    0.96
   0  10   1    2.53    0.78
  -1 -10  -1    5.39    0.96
  -1 -10  -1    6.35    0.93
  -1 -10  -1    7.60    1.21
   1  10   1    5.93    1.04
   1  10   1    6.63    1.42
   1  10   1    5.08    0.97
   1  10   1    6.83    1.08
  -2 -10  -1   10.13    1.49
  -2 -10  -1    9.47    0.92
  -2 -10  -1   10.37    1.13
  -2 -10  -1   10.20    1.14
   2  10   1    9.97    1.30
   2  10   1    7.91    1.21
   2  10   1   10.07    1.83
  -3 -10  -1    1.15    0.85
  -3 -10  -1   -0.45    0.84
  -3 -10  -1   -0.46    0.58
  -3 -10  -1   -1.42    1.08
   3  10   1   -0.12    0.91
   3  10   1    0.17    1.54
  -4 -10  -1    3.95    1.07
  -4 -10  -1    5.21    1.19
  -4 -10  -1    6.03    1.52
   4  10   1    3.57    1.95
   4  10   1    4.54    1.41
  -5 -10  -1   -0.80    1.12
  -5 -10  -1   -0.21    1.16
  -5 -10  -1    2.47    1.81
   5  10   1    0.50    1.40
   5  10   1   -1.12    1.39
   5  10   1    1.57    2.35
  -6 -10  -1   -2.21    2.09
  -6 -10  -1   -2.65    1.47
   6  10   1   -0.81    1.78
   6  10   1    1.43    1.80
   6  10   1   -0.99    2.75
   5 -11  -1   -0.83    1.55
   5 -11  -1   -2.67    1.45
  -5  11   1   -3.02    1.54
  -5  11   1    2.80    1.88
   4 -11  -1    1.85    1.34
   4 -11  -1    1.09    1.37
  -4  11   1    0.23    1.41
  -4  11   1    0.63    1.59
   3 -11  -1    1.12    1.37
   3 -11  -1   -0.59    1.25
   3 -11  -1   -1.43    1.09
   3 -11  -1    1.28    0.86
   3 -11  -1   -2.27    1.05
  -3  11   1    1.20    1.13
  -3  11   1   -0.22    1.44
   2 -11  -1    3.41    1.29
   2 -11  -1    2.26    1.48
   2 -11  -1    3.74    0.91
   2 -11  -1    3.65    1.06
   2 -11  -1    3.78    1.20
  -2  11   1    2.13    1.05
  -2  11   1    2.60    0.89
  -2  11   1    4.00    1.32
   1 -11  -1    1.10    1.16
   1 -11  -1    1.00    0.79
   1 -11  -1    1.09    0.92
   1 -11  -1    0.92    0.97
   1 -11  -1    2.15    1.53
  -1  11   1    0.60    0.66
  -1  11   1    0.32    0.87
  -1  11   1    1.88    1.33
   0 -11  -1   -0.10    0.74
   0 -11  -1   -0.65    1.01
   0 -11  -1    0.12    1.10
   0  11   1   -0.10    1.30
   0  11   1    2.71    1.16
   0  11   1    0.54    0.83
  -1 -11  -1    8.10    1.52
  -1 -11  -1    5.67    1.02
  -1 -11  -1    5.02    1.27
  -1 -11  -1    4.90    1.05
   1  11   1    3.58    1.14
   1  11   1    5.66    1.17
   1  11   1    2.49    1.58
  -2 -11  -1    4.94    1.11
  -2 -11  -1    5.97    1.51
  -2 -11  -1    6.08    0.77
   2  11   1    7.60    1.29
   2  11   1    9.16    1.84
  -3 -11  -1    0.39    1.01
  -3 -11  -1   -0.66    0.92
  -3 -11  -1    0.18    1.44
   3  11   1   -0.39    1.08
   3  11   1   -0.80    1.79
  -4 -11  -1   -1.49    1.05
  -4 -11  -1    0.78    1.83
  -4 -11  -1    3.08    1.14
   4  11   1   -1.02    1.44
   4  11   1   -0.31    1.31
   4  11   1    1.12    2.23
  -5 -11  -1    0.77    1.43
  -5 -11  -1    2.49    1.93
   5  11   1   -1.88    1.59
   5  11   1    2.72    1.72
   5  11   1   -3.37    2.63
   4 -12  -1    2.20    1.56
   4 -12  -1    1.68    1.58
  -4  12   1    0.12    1.51
  -4  12   1    1.21    1.98
   3 -12  -1   -1.85    1.44
   3 -12  -1   -1.42    1.29
   3 -12  -1    1.38    1.34
  -3  12   1    0.09    1.30
  -3  12   1   -0.19    1.55
   2 -12  -1    0.39    1.00
   2 -12  -1    1.09    1.25
   2 -12  -1    1.16    1.09
   2 -12  -1   -2.36    1.79
   2 -12  -1    1.45    1.39
  -2  12   1   -0.20    0.97
  -2  12   1    1.49    1.69
  -2  12   1   -0.74    1.09
   1 -12  -1    0.30    0.89
   1 -12  -1    1.24    1.30
   1 -12  -1    0.54    1.26
  -1  12   1    0.93    1.54
  -1  12   1    0.33    1.03
   0 -12  -1    3.37    0.84
   0 -12  -1    4.23    1.03
   0 -12  -1    2.02    1.30
   0 -12  -1    1.17    1.34
   0  12   1    4.41    1.66
   0  12   1    3.16    1.12
   0  12   1    4.57    0.79
  -1 -12  -1    6.57    1.14
  -1 -12  -1    4.75    1.53
  -1 -12  -1    4.45    1.50
   1  12   1    4.39    1.29
   1  12   1    7.37    1.91
   1  12   1    7.71    1.68
   1  12   1    6.22    1.05
  -2 -12  -1    4.25    1.20
  -2 -12  -1    4.65    1.60
  -2 -12  -1    6.67    1.35
   2  12   1    4.63    2.06
   2  12   1    3.90    1.28
  -3 -12  -1    0.64    1.27
  -3 -12  -1    0.01    1.68
  -3 -12  -1   -0.48    1.17
   3  12   1    0.56    1.26
   3  12   1    0.89    2.01
   3  12   1   -1.35    1.34
  -4 -12  -1   -4.02    1.86
  -4 -12  -1    4.64    1.44
   4  12   1    1.96    1.48
   4  12   1    5.23    2.45
   4  12   1   -1.60    1.54
   4 -13  -1    2.76    1.89
   4 -13  -1    2.31    1.85
  -4  13   1    1.70    2.90
  -4  13   1    0.36    2.33
   3 -13  -1    2.53    1.46
   3 -13  -1   -1.38    1.72
  -3  13   1   -3.55    1.46
  -3  13   1    0.40    1.83
   2 -13  -1    4.17    1.66
   2 -13  -1    0.27    1.54
   2 -13  -1   -0.75    1.17
  -2  13   1    3.44    1.88
  -2  13   1    4.40    1.29
  -2  13   1   -1.39    1.29
   1 -13  -1    4.13    1.23
   1 -13  -1    2.52    1.55
   1 -13  -1    7.15    1.76
  -1  13   1    4.25    1.34
  -1  13   1    4.16    1.98
   0 -13  -1    0.14    1.64
   0 -13  -1    1.29    0.91
   0 -13  -1    0.34    1.50
   0 -13  -1    1.82    1.06
   0  13   1    0.82    0.82
   0  13   1    1.24    1.31
   0  13   1    1.64    1.87
  -1 -13  -1    2.62    1.56
  -1 -13  -1   -5.01    1.60
  -1 -13  -1   -0.84    1.06
   1  13   1    0.49    1.29
   1  13   1   -1.26    0.97
   1  13   1    1.74    1.85
  -2 -13  -1   -1.28    1.18
  -2 -13  -1   -1.83    1.96
  -2 -13  -1    2.09    1.38
   2  13   1   -1.33    1.38
   2  13   1   -0.76    2.21
  -3 -13  -1    0.70    1.45
  -3 -13  -1   -1.64    2.06
  -3 -13  -1    1.11    1.40
   3  13   1   -0.09    1.46
   3  13   1    0.75    1.54
   3  13   1    0.34    2.56
  -4 -13  -1   -0.24    1.70
  -4 -13  -1   -0.24    2.42
   4  13   1   -0.52    3.41
   4  13   1   -0.04    1.85
   2 -14  -1    2.68    1.98
   2 -14  -1    0.66    1.56
  -2  14   1    1.64    2.53
  -2  14   1    1.75    1.81
   1 -14  -1    4.91    1.93
   1 -14  -1   -1.51    1.71
  -1  14   1   -0.07    2.15
  -1  14   1    1.59    1.55
   0 -14  -1   -0.87    1.72
   0 -14  -1    0.34    2.00
   0  14   1   -0.23    2.11
   0  14   1   -0.42    1.56
  -1 -14  -1    3.03    2.17
  -1 -14  -1   -3.01    1.84
  -1 -14  -1    1.49    1.37
   1  14   1    4.27    2.44
   1  14   1    2.72    1.70
  -2 -14  -1   -0.02    2.09
  -2 -14  -1    0.07    2.27
  -2 -14  -1    0.45    1.55
   2  14   1   -0.27    1.42
   2  14   1   -0.46    2.60
   2  14   1    2.74    1.74
   2  14  -2   -2.71    1.39
   2  14  -2   -0.24    2.60
   2  14  -2    1.14    1.69
  -2 -14   2   -1.63    2.29
  -2 -14   2   -0.41    2.02
  -2 -14   2   -1.44    1.49
   1  14  -2    1.76    2.46
   1  14  -2   -0.70    1.58
  -1 -14   2    5.00    2.02
  -1 -14   2    4.76    1.57
  -1 -14   2    4.41    1.90
   0  14  -2    0.40    2.27
   0 -14   2    4.73    1.50
   0 -14   2    3.72    2.06
   0 -14   2    4.31    1.88
  -1  14  -2   -1.33    1.52
  -1  14  -2    3.32    2.23
   1 -14   2   -0.24    1.76
   1 -14   2    1.57    1.99
  -2  14  -2   -0.46    2.19
  -2  14  -2   -0.89    1.69
   2 -14   2    7.06    2.02
   2 -14   2    2.64    1.59
   2 -14   2    0.34    2.14
   4  13  -2   -1.51    3.06
   4  13  -2    0.31    1.61
  -4 -13   2   -2.19    2.52
  -4 -13   2    1.69    1.60
   3  13  -2    0.68    2.33
   3  13  -2   -0.47    1.43
   3  13  -2    1.69    1.57
  -3 -13   2    0.98    2.20
  -3 -13   2    0.42    1.51
   2  13  -2    1.52    1.44
   2  13  -2   -2.31    2.05
   2  13  -2   -0.59    1.19
  -2 -13   2    1.56    1.98
  -2 -13   2    0.42    1.23
   1  13  -2   -0.45    2.06
   1  13  -2    1.50    1.36
   1  13  -2    0.63    0.96
  -1 -13   2    1.01    1.12
  -1 -13   2    0.97    1.72
  -1 -13   2    0.42    1.47
   0  13  -2    0.08    1.86
   0 -13   2    1.65    1.18
   0 -13   2   -0.16    1.83
   0 -13   2   -2.37    1.41
  -1  13  -2    1.84    1.87
  -1  13  -2    0.29    1.38
   1 -13   2    1.50    1.64
   1 -13   2   -0.02    1.46
  -2  13  -2    1.86    1.54
  -2  13  -2   -1.46    1.80
   2 -13   2    1.76    1.54
   2 -13   2   -1.26    1.31
   2 -13   2   -1.14    1.78
  -3  13  -2   -0.70    1.77
  -3  13  -2    4.36    1.83
   3 -13   2    1.17    1.73
   3 -13   2   -1.01    1.68
   4  12  -2    1.12    1.63
   4  12  -2   -0.46    2.26
   4  12  -2   -0.69    1.46
  -4 -12   2    1.58    1.41
  -4 -12   2    0.61    1.92
   3  12  -2   -0.15    1.95
   3  12  -2    0.06    1.42
   3  12  -2   -0.09    1.16
  -3 -12   2    0.62    1.81
  -3 -12   2   -1.47    1.12
   2  12  -2    0.08    1.80
   2  12  -2    0.66    1.20
   2  12  -2   -1.11    0.96
  -2 -12   2    0.49    1.58
  -2 -12   2    0.98    1.12
   1  12  -2    0.16    1.73
   1  12  -2    1.52    0.90
   1  12  -2    0.88    1.14
   1  12  -2    3.86    1.27
  -1 -12   2    4.34    1.17
  -1 -12   2    2.33    1.58
  -1 -12   2    2.34    1.36
   0  12  -2    3.65    1.16
   0  12  -2    2.74    1.26
   0  12  -2    3.37    0.76
   0  12  -2    0.93    1.61
   0 -12   2    2.17    1.42
   0 -12   2    1.50    0.95
   0 -12   2    3.40    1.44
  -1  12  -2    2.42    1.62
   1 -12   2   -0.62    1.21
   1 -12   2    1.38    1.57
  -2  12  -2    2.98    1.28
  -2  12  -2    5.39    2.00
   2 -12   2    1.91    1.30
   2 -12   2    4.73    1.24
   2 -12   2    4.19    1.63
   2 -12   2    3.63    1.43
  -3  12  -2    0.26    1.64
  -3  12  -2   -1.17    1.47
   3 -12   2    2.46    1.51
   3 -12   2   -0.44    1.38
   3 -12   2    1.68    1.68
  -4  12  -2    0.50    1.61
  -4  12  -2    1.73    1.97
   4 -12   2    0.72    1.60
   4 -12   2    0.97    1.66
   5  11  -2    5.51    1.85
   5  11  -2    0.09    1.71
   5  11  -2   -1.08    2.73
  -5 -11   2    1.98    1.59
  -5 -11   2   -3.49    1.84
   4  11  -2    4.59    2.14
   4  11  -2   -0.06    1.43
   4  11  -2   -1.08    1.21
  -4 -11   2    0.59    1.67
  -4 -11   2   -1.77    1.19
   3  11  -2    0.00    1.07
   3  11  -2    2.04    1.75
   3  11  -2    1.27    1.09
  -3 -11   2   -1.27    1.00
  -3 -11   2    1.22    0.94
  -3 -11   2   -1.20    1.37
   2  11  -2    7.10    1.30
   2  11  -2    7.86    1.82
   2  11  -2    5.40    1.04
  -2 -11   2    5.92    1.14
  -2 -11   2    8.45    1.11
  -2 -11   2    6.85    1.61
   1  11  -2    2.33    1.50
   1  11  -2    3.28    1.08
   1  11  -2    3.71    0.96
   1  11  -2    1.50    0.76
  -1 -11   2    4.07    0.98
  -1 -11   2    1.96    1.35
   0  11  -2    1.17    1.03
   0  11  -2    2.93    1.05
   0  11  -2    2.15    1.29
   0  11  -2    1.87    0.58
   0 -11   2    0.74    1.22
   0 -11   2    2.12    0.87
   0 -11   2   -0.25    1.01
  -1  11  -2   -0.92    1.27
  -1  11  -2    1.11    1.31
   1 -11   2    0.97    1.04
   1 -11   2    0.86    1.10
   1 -11   2   -0.78    0.84
  -2  11  -2    4.63    1.46
  -2  11  -2    5.30    1.24
   2 -11   2    3.52    1.15
   2 -11   2    6.24    1.36
   2 -11   2    4.94    0.98
  -3  11  -2    7.31    1.58
  -3  11  -2   10.64    1.54
   3 -11   2    6.27    1.47
   3 -11   2    5.62    1.28
   3 -11   2    7.25    1.60
  -4  11  -2    0.48    1.38
  -4  11  -2    1.90    1.66
   4 -11   2   -0.69    1.51
   4 -11   2    4.65    1.71
   4 -11   2    3.64    1.42
  -5  11  -2   -0.08    2.04
  -5  11  -2   -2.19    1.65
   5 -11   2   -3.66    1.93
   5 -11   2   -2.73    1.55
   6  10  -2    0.07    2.51
   6  10  -2   -0.11    1.68
   6  10  -2    0.09    2.02
  -6 -10   2    0.46    1.58
  -6 -10   2    1.18    2.10
   5  10  -2    3.43    1.54
   5  10  -2    5.07    1.57
   5  10  -2    2.42    2.11
  -5 -10   2    3.42    1.47
  -5 -10   2    3.48    1.78
   4  10  -2    2.38    1.30
   4  10  -2   -0.96    1.68
   4  10  -2    1.55    1.17
  -4 -10   2    2.78    1.17
  -4 -10   2    2.38    1.50
  -4 -10   2    1.49    0.76
  -4 -10   2    3.14    1.14
   3  10  -2   -1.23    0.92
   3  10  -2   -0.22    0.86
   3  10  -2    1.49    1.52
  -3 -10   2   -0.23    1.20
  -3 -10   2   -0.28    0.89
  -3 -10   2   -0.95    0.89
  -3 -10   2   -0.61    0.67
   2  10  -2   12.39    1.74
   2  10  -2    9.50    1.30
   2  10  -2   10.26    1.15
  -2 -10   2   10.49    1.33
  -2 -10   2   10.90    1.28
  -2 -10   2   10.76    1.59
   1  10  -2    4.83    0.89
   1  10  -2    7.40    1.12
   1  10  -2    5.30    1.06
   1  10  -2    6.91    2.72
   1  10  -2    6.25    0.86
  -1 -10   2    6.13    1.27
  -1 -10   2    6.79    0.92
   0  10  -2    2.24    0.55
   0  10  -2    4.23    0.96
   0  10  -2    4.24    0.90
   0  10  -2    3.12    1.23
   0 -10   2    3.30    0.92
   0 -10   2    3.28    0.97
   0 -10   2    4.24    1.16
   0 -10   2    3.62    0.80
  -1  10  -2    1.54    0.17
  -1  10  -2   -1.12    0.97
  -1  10  -2    2.71    1.16
   1 -10   2    2.84    1.29
   1 -10   2    2.39    0.91
   1 -10   2    0.28    0.77
   1 -10   2    3.56    1.03
  -2  10  -2    9.50    2.27
  -2  10  -2    9.71    1.80
   2 -10   2   13.08    1.46
   2 -10   2    9.81    1.06
   2 -10   2   10.37    1.70
  -3  10  -2    7.88    1.32
  -3  10  -2    6.77    1.36
   3 -10   2    6.09    1.65
   3 -10   2    5.66    1.36
   3 -10   2    5.70    1.31
   3 -10   2    5.96    0.85
  -4  10  -2    0.31    1.15
  -4  10  -2    0.97    1.39
   4 -10   2   -1.20    1.75
   4 -10   2    1.49    1.13
   4 -10   2   -0.70    1.26
   4 -10   2   -0.27    1.31
  -5  10  -2    3.22    1.65
  -5  10  -2    3.10    1.54
   5 -10   2   -0.54    1.45
   5 -10   2   -1.86    1.64
   5 -10   2    1.85    1.88
  -6  10  -2    1.58    2.11
  -6  10  -2    0.51    2.10
   6 -10   2    3.93    1.94
   6 -10   2    3.22    2.30
   6   9  -2    0.48    1.62
   6   9  -2   -0.72    2.22
   6   9  -2    0.07    1.54
  -6  -9   2    0.24    1.87
  -6  -9   2    0.41    1.55
   5   9  -2    0.48    1.37
   5   9  -2   -1.96    1.74
   5   9  -2   -0.28    1.21
  -5  -9   2    0.51    0.80
  -5  -9   2   -0.06    1.36
  -5  -9   2   -0.67    1.08
  -5  -9   2    0.96    1.32
   4   9  -2    1.90    1.52
   4   9  -2    2.43    1.03
   4   9  -2    0.06    1.02
  -4  -9   2    3.89    0.72
  -4  -9   2    2.84    1.00
  -4  -9   2    5.41    1.30
  -4  -9   2    2.98    1.04
   3   9  -2   -1.81    0.80
   3   9  -2    0.47    0.78
  -3  -9   2    0.74    0.73
  -3  -9   2   -0.82    0.79
  -3  -9   2    0.07    0.99
  -3  -9   2    0.70    0.56
   2   9  -2    9.81    1.12
   2   9  -2    9.98    1.21
   2   9  -2    9.40    1.02
   2   9  -2   11.53    1.56
   2   9  -2   10.86    1.31
  -2  -9   2   12.41    1.44
  -2  -9   2   10.17    1.05
  -2  -9   2   10.50    1.15
  -2  -9   2   11.73    0.97
   1   9  -2    0.84    0.70
   1   9  -2    1.06    0.93
   1   9  -2    1.66    0.78
   1   9  -2    1.53    0.73
   1   9  -2    2.78    1.01
   1   9  -2    0.66    0.62
   1   9  -2    1.43    0.58
  -1  -9   2    1.94    0.65
  -1  -9   2    0.90    1.10
  -1  -9   2    2.13    0.92
  -1  -9   2    2.43    0.74
   0   9  -2    1.37    0.66
   0   9  -2    0.83    0.87
   0   9  -2    2.08    0.72
   0   9  -2    1.43    0.44
   0   9  -2    1.92    0.73
   0   9  -2    2.37    0.99
   0  -9   2    1.71    0.69
   0  -9   2    0.04    0.67
   0  -9   2    0.44    1.02
   0  -9   2    0.76    0.77
   0  -9   2    1.05    0.62
  -1   9  -2   -0.17    0.75
  -1   9  -2   -0.19    0.96
  -1   9  -2   -1.90    0.81
  -1   9  -2   -0.07    0.15
  -1   9  -2   -0.94    0.65
   1  -9   2    0.92    0.56
   1  -9   2    0.92    1.20
   1  -9   2    0.74    0.82
   1  -9   2    0.53    0.60
   1  -9   2   -0.04    0.68
  -2   9  -2    7.77    1.36
  -2   9  -2    8.97    1.32
  -2   9  -2   12.09    1.32
  -2   9  -2    9.94    1.44
   2  -9   2    8.96    1.36
   2  -9   2   10.03    1.21
   2  -9   2    7.45    0.85
   2  -9   2   10.82    1.29
  -3   9  -2    2.76    1.07
  -3   9  -2    2.16    1.10
   3  -9   2    3.26    1.02
   3  -9   2    3.63    1.05
   3  -9   2    3.44    0.61
   3  -9   2    4.01    1.11
   3  -9   2    2.70    1.18
  -4   9  -2   -0.44    0.96
  -4   9  -2    2.10    1.17
   4  -9   2    1.03    1.04
   4  -9   2    0.41    0.37
   4  -9   2   -1.39    1.20
   4  -9   2    0.54    1.46
   4  -9   2    0.34    1.16
  -5   9  -2    0.26    1.29
  -5   9  -2   -0.90    1.29
   5  -9   2    0.78    1.33
   5  -9   2   -0.40    1.39
   5  -9   2   -3.31    1.40
  -6   9  -2    0.18    1.61
  -6   9  -2   -1.90    1.75
   6  -9   2    0.43    1.49
   6  -9   2    1.14    2.01
   7   8  -2   -0.58    2.41
  -7  -8   2    2.60    2.62
  -7  -8   2   -2.53    1.58
   6   8  -2    0.13    1.29
   6   8  -2    0.77    1.51
   6   8  -2    2.98    1.92
  -6  -8   2   -1.13    1.26
  -6  -8   2    1.74    1.75
  -6  -8   2   -0.22    1.31
   5   8  -2    2.44    1.55
   5   8  -2    0.09    1.10
   5   8  -2    0.52    1.06
  -5  -8   2    0.53    1.10
  -5  -8   2    0.07    1.14
  -5  -8   2    0.87    1.25
  -5  -8   2    0.53    0.74
  -5  -8   2   -0.61    0.99
   4   8  -2    0.59    1.26
   4   8  -2    0.34    0.82
  -4  -8   2    0.73    1.09
  -4  -8   2    1.36    0.88
  -4  -8   2   -0.19    0.57
  -4  -8   2   -0.59    0.81
   3   8  -2    0.82    0.68
   3   8  -2   -0.34    1.04
   3   8  -2   -0.54    0.74
   3   8  -2    0.24    0.71
   3   8  -2   -0.15    0.65
  -3  -8   2    0.48    0.50
  -3  -8   2   -0.44    0.64
  -3  -8   2   -0.13    0.67
  -3  -8   2    0.41    0.86
   2   8  -2    0.52    0.81
   2   8  -2    1.76    0.65
   2   8  -2    1.22    0.66
   2   8  -2   -0.24    0.60
   2   8  -2   -1.22    0.83
   2   8  -2    0.96    0.61
  -2  -8   2    0.02    0.52
  -2  -8   2    0.29    0.44
  -2  -8   2    0.48    0.54
  -2  -8   2   -0.45    0.61
  -2  -8   2   -0.03    0.70
  -2  -8   2    1.50    1.16
   1   8  -2    1.54    0.69
   1   8  -2    1.53    0.60
   1   8  -2    1.22    0.49
   1   8  -2    0.59    0.81
   1   8  -2    3.18    0.73
   1   8  -2    2.18    0.83
   1   8  -2    2.47    0.53
  -1  -8   2    1.57    0.94
  -1  -8   2    3.45    0.87
  -1  -8   2    2.70    0.67
  -1  -8   2    1.60    0.55
   0   8  -2    3.22    0.63
   0   8  -2    1.89    0.87
   0   8  -2    2.20    0.62
   0   8  -2    2.16    0.42
   0   8  -2    2.11    0.61
   0   8  -2    1.93    0.79
   0  -8   2    1.65    0.82
   0  -8   2    2.64    0.75
   0  -8   2    1.72    0.58
   0  -8   2    3.01    0.93
   0  -8   2    2.12    0.56
  -1   8  -2    3.00    0.93
  -1   8  -2    2.24    0.24
  -1   8  -2    2.65    0.68
  -1   8  -2    0.86    0.60
  -1   8  -2    2.72    0.84
   1  -8   2    3.66    0.74
   1  -8   2    3.66    0.91
   1  -8   2    1.21    0.78
   1  -8   2    2.25    0.60
   1  -8   2    3.04    0.62
  -2   8  -2    9.93    1.08
  -2   8  -2   10.50    1.25
  -2   8  -2   10.48    1.23
  -2   8  -2   12.12    1.25
  -2   8  -2    9.03    0.98
   2  -8   2    8.84    1.18
   2  -8   2    9.42    0.89
   2  -8   2   10.12    1.09
   2  -8   2    8.20    1.15
  -3   8  -2   -0.62    0.81
  -3   8  -2   -0.54    0.75
  -3   8  -2   -0.70    1.02
  -3   8  -2    0.24    0.87
   3  -8   2    0.26    0.43
   3  -8   2    0.33    1.05
   3  -8   2   -0.02    0.70
   3  -8   2    0.61    0.76
   3  -8   2    0.58    0.88
  -4   8  -2    1.82    0.95
  -4   8  -2    1.84    1.15
   4  -8   2    2.46    1.00
   4  -8   2    2.23    1.17
   4  -8   2    2.00    0.28
   4  -8   2    2.29    0.28
   4  -8   2    0.71    1.09
   4  -8   2    3.10    1.15
  -5   8  -2    1.07    1.18
  -5   8  -2    1.36    1.15
   5  -8   2    0.79    1.51
   5  -8   2   -3.35    1.17
   5  -8   2    1.69    1.16
   5  -8   2   -0.89    1.28
  -6   8  -2   -2.07    1.35
  -6   8  -2   -1.36    1.19
   6  -8   2   -0.32    1.80
   6  -8   2   -0.48    1.35
   7   7  -2   -0.50    2.45
   7   7  -2   -2.80    1.70
  -7  -7   2    0.09    1.49
  -7  -7   2   -1.63    1.52
  -7  -7   2    0.83    2.20
   6   7  -2    1.44    1.27
   6   7  -2   -0.51    1.29
   6   7  -2   -1.05    1.63
   6   7  -2   -1.86    0.82
  -6  -7   2   -0.04    0.87
  -6  -7   2   -1.03    1.32
  -6  -7   2    0.91    1.18
  -6  -7   2    0.45    1.25
   5   7  -2   -0.94    0.88
   5   7  -2   -0.28    0.93
   5   7  -2   -0.98    1.37
  -5  -7   2   -0.53    0.84
  -5  -7   2   -0.06    0.97
  -5  -7   2   -0.32    0.64
  -5  -7   2    1.05    1.17
   4   7  -2   44.77    2.18
   4   7  -2   41.81    2.11
   4   7  -2   37.99    2.09
   4   7  -2   41.28    2.55
  -4  -7   2   40.38    1.98
  -4  -7   2   38.60    2.20
  -4  -7   2   39.75    1.95
  -4  -7   2   45.06    2.02
  -4  -7   2   39.94    1.50
   3   7  -2    2.62    0.83
   3   7  -2    0.74    0.63
   3   7  -2    0.96    0.62
   3   7  -2    0.95    0.61
   3   7  -2    0.92    0.64
   3   7  -2    2.50    0.96
  -3  -7   2    2.40    0.67
  -3  -7   2    1.16    0.64
  -3  -7   2    3.24    0.88
  -3  -7   2    1.71    0.64
  -3  -7   2    0.81    0.43
  -3  -7   2    1.98    0.83
   2   7  -2    0.87    0.48
   2   7  -2    0.20    0.64
   2   7  -2    0.05    0.55
   2   7  -2    1.38    0.51
   2   7  -2    1.23    0.55
   2   7  -2    0.82    0.84
  -2  -7   2    0.66    0.49
  -2  -7   2    0.39    0.45
  -2  -7   2    0.54    0.58
  -2  -7   2    0.45    0.36
  -2  -7   2    1.52    0.83
  -2  -7   2    0.56    0.49
   1   7  -2   10.28    0.76
   1   7  -2   11.60    0.91
   1   7  -2   12.24    1.07
   1   7  -2   12.04    1.24
   1   7  -2   10.36    0.72
   1   7  -2   12.75    0.91
   1   7  -2   11.74    1.01
  -1  -7   2   10.95    0.95
  -1  -7   2   11.51    1.20
  -1  -7   2   10.91    0.86
  -1  -7   2    9.69    1.07
   0   7  -2    5.06    0.65
   0   7  -2    5.86    0.64
   0   7  -2    5.93    0.90
   0   7  -2    4.52    0.76
   0   7  -2    5.59    0.54
   0   7  -2    5.09    0.69
   0  -7   2    3.97    0.79
   0  -7   2    5.41    0.66
   0  -7   2    4.20    0.59
   0  -7   2    3.67    0.78
  -1   7  -2    2.33    0.77
  -1   7  -2    3.41    0.59
  -1   7  -2    2.98    0.21
  -1   7  -2    2.98    0.65
  -1   7  -2    4.13    0.84
   1  -7   2    3.28    0.56
   1  -7   2    3.03    0.62
   1  -7   2    1.84    0.69
   1  -7   2    2.73    0.53
   1  -7   2    4.66    0.83
  -2   7  -2    3.51    0.89
  -2   7  -2    2.42    0.63
  -2   7  -2    2.65    0.76
  -2   7  -2    1.56    0.72
  -2   7  -2    2.78    0.66
   2  -7   2    1.95    0.86
   2  -7   2    3.72    0.68
   2  -7   2    2.84    0.48
   2  -7   2    2.73    0.75
  -3   7  -2    3.73    0.81
  -3   7  -2    4.23    0.83
  -3   7  -2    3.66    0.88
  -3   7  -2    4.09    0.90
  -3   7  -2    5.21    1.06
   3  -7   2    5.32    0.91
   3  -7   2    5.08    0.90
   3  -7   2    3.80    1.03
   3  -7   2    5.73    0.93
   3  -7   2    3.51    0.44
  -4   7  -2    0.41    1.09
  -4   7  -2    1.53    0.83
  -4   7  -2   -0.63    0.85
   4  -7   2    0.96    1.00
   4  -7   2   -1.07    0.97
   4  -7   2   -1.31    0.75
   4  -7   2    1.01    1.01
  -5   7  -2   -1.46    0.92
  -5   7  -2   -0.58    0.99
   5  -7   2    0.01    0.33
   5  -7   2   -1.01    1.04
   5  -7   2    1.57    0.96
   5  -7   2   -0.15    1.15
   5  -7   2   -1.96    1.00
  -6   7  -2    1.19    1.17
  -6   7  -2   -3.11    1.14
   6  -7   2    1.13    1.44
   6  -7   2    1.58    1.67
  -7   7  -2    2.92    1.88
  -7   7  -2    3.14    1.75
   7  -7   2    1.34    2.26
   7   6  -2    2.56    2.19
   7   6  -2   -1.41    1.62
  -7  -6   2    1.63    1.45
  -7  -6   2    0.30    1.70
  -7  -6   2    0.15    1.31
   6   6  -2    0.38    1.55
   6   6  -2   -1.20    1.29
   6   6  -2    0.53    0.99
   6   6  -2    1.59    0.72
  -6  -6   2    1.47    1.43
  -6  -6   2    0.98    1.18
  -6  -6   2    0.13    1.05
   5   6  -2    1.37    0.87
   5   6  -2    1.59    1.35
   5   6  -2    0.84    0.91
  -5  -6   2    1.59    0.94
  -5  -6   2    1.42    0.88
  -5  -6   2    3.27    0.94
  -5  -6   2    3.30    1.23
  -5  -6   2    2.68    0.69
   4   6  -2   -0.19    0.67
   4   6  -2    0.21    0.89
   4   6  -2    0.77    0.68
   4   6  -2    0.27    0.74
   4   6  -2   -0.73    0.60
   4   6  -2   -0.31    0.88
  -4  -6   2   -0.39    0.62
  -4  -6   2   -0.17    0.43
  -4  -6   2    0.38    0.75
  -4  -6   2    0.93    0.70
  -4  -6   2    0.17    0.71
  -4  -6   2    1.14    1.19
  -4  -6   2   -0.17    0.63
   3   6  -2    6.38    0.84
   3   6  -2    8.18    0.99
   3   6  -2    6.25    0.80
   3   6  -2    8.68    1.21
   3   6  -2    7.31    0.85
   3   6  -2    7.58    0.87
  -3  -6   2    8.10    1.18
  -3  -6   2    6.87    0.97
  -3  -6   2    7.70    0.90
  -3  -6   2    8.24    0.91
  -3  -6   2    9.28    0.98
  -3  -6   2    8.41    0.61
  -3  -6   2    7.32    0.84
   2   6  -2  108.10    3.07
   2   6  -2  103.24    3.18
   2   6  -2  106.93    3.19
   2   6  -2  102.30    2.96
   2   6  -2  113.10    3.48
   2   6  -2  106.96    3.10
  -2  -6   2  103.75    2.68
  -2  -6   2  109.26    3.32
  -2  -6   2  112.93    3.22
  -2  -6   2  109.55    3.08
  -2  -6   2  104.76    3.47
  -2  -6   2  102.62    2.98
   1   6  -2    2.39    0.37
   1   6  -2    2.86    0.51
   1   6  -2    2.40    0.46
   1   6  -2    1.84    0.39
   1   6  -2    2.14    0.41
   1   6  -2    3.00    0.59
   1   6  -2    3.51    0.70
  -1  -6   2    2.11    0.44
  -1  -6   2    2.69    0.68
  -1  -6   2    2.50    0.49
  -1  -6   2    2.46    0.60
   0   6  -2   29.08    1.25
   0   6  -2   30.00    1.16
   0   6  -2   28.59    1.48
   0   6  -2   29.70    1.32
   0   6  -2   30.65    1.22
   0  -6   2   28.60    1.20
   0  -6   2   28.29    1.44
   0  -6   2   26.85    1.41
   0  -6   2   27.89    1.20
  -1   6  -2   10.73    0.33
  -1   6  -2   10.22    0.98
  -1   6  -2   11.62    1.02
  -1   6  -2   11.84    0.81
  -1   6  -2   11.21    0.89
   1  -6   2   11.76    0.76
   1  -6   2   12.12    0.99
   1  -6   2   11.62    0.78
   1  -6   2   11.12    0.83
   1  -6   2   11.55    1.00
  -2   6  -2    1.64    0.61
  -2   6  -2    1.74    0.55
  -2   6  -2    0.98    0.47
  -2   6  -2    1.74    0.68
  -2   6  -2    1.57    0.55
   2  -6   2    0.82    0.61
   2  -6   2    1.68    0.63
   2  -6   2    1.59    0.34
   2  -6   2    2.50    0.58
  -3   6  -2    7.76    0.86
  -3   6  -2    9.00    0.98
  -3   6  -2    8.32    0.94
  -3   6  -2    6.09    0.98
  -3   6  -2    8.25    0.97
   3  -6   2    7.42    0.90
   3  -6   2    7.40    1.05
   3  -6   2    9.26    0.97
   3  -6   2   10.43    1.11
   3  -6   2    8.67    0.54
  -4   6  -2    3.19    0.89
  -4   6  -2    3.40    0.90
  -4   6  -2    3.37    1.06
  -4   6  -2    3.50    0.88
   4  -6   2    3.53    0.96
   4  -6   2    2.42    0.89
   4  -6   2    2.99    0.36
   4  -6   2    2.62    0.96
   4  -6   2    4.54    1.09
  -5   6  -2   -0.53    0.88
  -5   6  -2   -0.10    0.88
   5  -6   2   -2.72    0.98
   5  -6   2    0.17    0.53
   5  -6   2    1.26    1.03
   5  -6   2   -0.75    0.83
   5  -6   2    0.23    1.16
  -6   6  -2    0.03    1.09
   6  -6   2    2.46    1.60
   6  -6   2    1.65    1.32
   6  -6   2    0.03    0.84
   6  -6   2    0.32    1.47
  -7   6  -2   -1.06    1.40
  -7   6  -2    2.33    1.55
   7  -6   2   -2.12    1.75
   7   5  -2    0.74    1.45
   7   5  -2   -0.98    1.81
   7   5  -2   -0.09    1.58
  -7  -5   2    0.27    1.31
  -7  -5   2   -0.14    1.58
  -7  -5   2   -1.32    1.37
   6   5  -2    1.16    0.51
   6   5  -2    2.09    1.49
   6   5  -2    0.93    1.11
   6   5  -2    2.14    1.09
  -6  -5   2    3.04    1.21
  -6  -5   2    2.36    0.98
  -6  -5   2    3.12    1.14
   5   5  -2   -0.02    0.97
   5   5  -2    0.18    0.78
   5   5  -2   -0.40    0.85
   5   5  -2   -1.02    0.98
   5   5  -2   -0.63    0.80
   5   5  -2   -0.36    1.21
  -5  -5   2   -0.66    0.60
  -5  -5   2    0.03    0.94
  -5  -5   2   -1.06    0.79
  -5  -5   2   -0.88    0.65
  -5  -5   2   -0.13    0.91
   4   5  -2    6.47    1.21
   4   5  -2    4.89    0.83
   4   5  -2    7.11    0.89
   4   5  -2    5.09    0.78
   4   5  -2    5.00    0.80
   4   5  -2    4.30    0.74
  -4  -5   2    6.10    0.84
  -4  -5   2    4.60    0.88
  -4  -5   2    5.25    0.80
  -4  -5   2    4.17    0.81
  -4  -5   2    5.21    1.18
  -4  -5   2    6.20    0.86
   3   5  -2   11.87    1.00
   3   5  -2    9.69    1.14
   3   5  -2   11.09    0.80
   3   5  -2    9.92    0.97
   3   5  -2   11.13    1.01
   3   5  -2    9.90    0.84
  -3  -5   2    9.21    0.79
  -3  -5   2   12.32    1.12
  -3  -5   2   10.89    0.87
  -3  -5   2   11.85    0.99
  -3  -5   2   10.20    1.18
  -3  -5   2    9.74    0.91
   2   5  -2   30.59    1.32
   2   5  -2   30.54    1.56
   2   5  -2   32.76    1.38
   2   5  -2   32.85    1.29
   2   5  -2   32.50    1.40
   2   5  -2   33.08    1.27
  -2  -5   2   31.24    0.97
  -2  -5   2   32.49    1.62
  -2  -5   2   32.57    1.35
  -2  -5   2   30.08    1.29
  -2  -5   2   31.75    1.47
   1   5  -2    2.25    0.41
   1   5  -2    1.37    0.27
   1   5  -2    1.88    0.43
   1   5  -2    1.16    0.43
   1   5  -2    1.06    0.33
   1   5  -2    1.44    0.56
  -1  -5   2    1.67    0.50
  -1  -5   2    1.87    0.38
  -1  -5   2    1.49    0.37
  -1  -5   2    1.47    0.27
  -1  -5   2    2.19    0.50
   0   5  -2   21.43    0.97
   0   5  -2   22.82    0.94
   0   5  -2   19.47    1.14
   0   5  -2   21.03    0.75
   0   5  -2   21.89    1.09
   0   5  -2   21.04    0.86
   0  -5   2   21.77    1.16
   0  -5   2   21.25    0.94
   0  -5   2   19.83    1.11
   0  -5   2   19.60    0.95
  -1   5  -2    0.22    0.42
  -1   5  -2    0.31    0.33
  -1   5  -2   -0.34    0.39
  -1   5  -2    0.45    0.32
   1  -5   2   -0.22    0.41
   1  -5   2    0.49    0.42
   1  -5   2    0.05    0.28
   1  -5   2    0.30    0.35
   1  -5   2    0.23    0.28
  -2   5  -2   48.56    1.82
  -2   5  -2   51.18    1.89
  -2   5  -2   51.75    1.82
  -2   5  -2   49.49    1.72
   2  -5   2   51.22    1.46
   2  -5   2   49.02    1.74
   2  -5   2   46.61    1.80
   2  -5   2   51.06    1.85
  -3   5  -2    7.92    0.87
  -3   5  -2    8.76    0.96
  -3   5  -2    9.95    0.96
  -3   5  -2   10.48    0.97
   3  -5   2    8.85    0.46
   3  -5   2    9.62    1.02
   3  -5   2    9.03    1.01
   3  -5   2    8.77    0.93
   3  -5   2    9.42    0.45
   3  -5   2   10.03    1.03
   3  -5   2    8.48    0.87
  -4   5  -2    5.15    1.08
  -4   5  -2    4.58    0.83
  -4   5  -2    4.26    0.81
  -4   5  -2    4.66    0.84
   4  -5   2    6.50    1.00
   4  -5   2    4.55    0.94
   4  -5   2    4.56    0.97
   4  -5   2    5.97    0.88
   4  -5   2    4.17    0.52
   4  -5   2    3.75    0.84
  -5   5  -2    1.02    1.20
  -5   5  -2    1.18    0.88
  -5   5  -2    0.24    0.76
   5  -5   2    0.41    0.96
   5  -5   2   -0.76    0.74
   5  -5   2   -0.19    0.56
   5  -5   2   -0.77    0.92
   5  -5   2    0.53    0.98
  -6   5  -2    1.90    1.05
  -6   5  -2    2.77    1.08
   6  -5   2    1.03    1.36
   6  -5   2    3.64    1.31
   6  -5   2    0.43    0.83
   6  -5   2    4.01    1.44
  -7   5  -2    1.84    1.33
  -7   5  -2    0.40    1.43
   7  -5   2    1.63    1.83
   7  -5   2   -0.02    1.23
   7   4  -2    1.95    1.72
   7   4  -2   -1.69    1.26
   7   4  -2   -1.76    1.30
  -7  -4   2    0.32    1.21
  -7  -4   2    0.23    1.39
  -7  -4   2    0.04    1.39
   6   4  -2   -0.87    1.32
   6   4  -2   -0.59    0.83
   6   4  -2   -0.42    0.27
   6   4  -2   -1.13    1.22
   6   4  -2    1.42    1.03
   6   4  -2    0.56    1.09
  -6  -4   2   -0.15    1.15
  -6  -4   2   -0.06    0.88
  -6  -4   2    0.11    0.96
  -6  -4   2   -0.37    0.89
   5   4  -2    6.64    1.09
   5   4  -2    5.63    0.87
   5   4  -2    4.49    0.97
   5   4  -2    5.60    0.99
   5   4  -2    7.28    0.72
   5   4  -2    5.82    1.06
   5   4  -2    6.18    1.26
  -5  -4   2    5.67    0.92
  -5  -4   2    9.50    1.43
  -5  -4   2    5.29    1.14
  -5  -4   2    6.11    1.02
  -5  -4   2    3.70    0.86
  -5  -4   2    6.97    1.20
   4   4  -2    7.48    0.91
   4   4  -2    7.65    0.87
   4   4  -2    5.86    0.88
   4   4  -2    7.89    0.85
   4   4  -2    7.04    0.85
   4   4  -2    8.55    1.10
   4   4  -2    7.77    0.93
  -4  -4   2    8.10    1.18
  -4  -4   2    7.16    0.85
  -4  -4   2    6.83    0.80
  -4  -4   2    5.91    0.90
  -4  -4   2    8.48    0.93
  -4  -4   2    7.78    0.94
   3   4  -2    3.50    0.69
   3   4  -2    2.33    0.53
   3   4  -2    3.00    0.51
   3   4  -2    1.71    0.58
   3   4  -2    2.37    0.49
   3   4  -2    2.12    0.51
  -3  -4   2    3.06    0.57
  -3  -4   2    3.49    0.55
  -3  -4   2    2.90    0.61
  -3  -4   2    2.60    0.76
  -3  -4   2    2.43    0.52
  -3  -4   2    2.28    0.55
   2   4  -2  216.69    5.32
   2   4  -2  219.24    5.53
   2   4  -2  207.84    5.37
   2   4  -2  220.60    5.39
   2   4  -2  217.13    5.33
   2   4  -2  212.22    5.26
  -2  -4   2  213.52    5.28
  -2  -4   2  213.89    5.27
  -2  -4   2  212.08    5.56
  -2  -4   2  218.91    5.43
  -2  -4   2  212.45    4.88
  -2  -4   2  212.31    5.19
  -2  -4   2  226.64    5.39
   1   4  -2   16.88    0.76
   1   4  -2   16.40    0.85
   1   4  -2   16.22    0.55
   1   4  -2   17.57    0.99
   1   4  -2   17.33    0.73
  -1  -4   2   16.23    0.78
  -1  -4   2   17.02    0.57
  -1  -4   2   15.45    0.95
  -1  -4   2   16.80    0.92
   0   4  -2  246.91    5.57
   0   4  -2  230.35    5.81
   0   4  -2  237.07    5.70
   0   4  -2  235.40    5.47
   0   4  -2  247.13    5.89
   0   4  -2  243.23    5.66
   0  -4   2  243.94    5.67
   0  -4   2  244.93    5.89
   0  -4   2  243.65    5.70
   0  -4   2  238.75    5.85
  -1   4  -2   67.94    1.98
  -1   4  -2   64.80    2.10
  -1   4  -2   67.48    2.08
  -1   4  -2   69.65    1.98
   1  -4   2   69.17    2.09
   1  -4   2   67.87    1.95
   1  -4   2   64.09    2.06
   1  -4   2   70.23    1.85
   1  -4   2   70.21    1.94
  -2   4  -2   11.50    0.73
  -2   4  -2   10.04    0.69
  -2   4  -2   12.13    0.87
  -2   4  -2   11.86    0.80
  -2   4  -2   10.80    0.81
   2  -4   2   11.78    0.84
   2  -4   2   11.08    0.73
   2  -4   2   11.86    0.51
   2  -4   2   10.61    0.73
   2  -4   2   10.78    0.85
  -3   4  -2   34.36    1.58
  -3   4  -2   32.84    1.47
  -3   4  -2   32.00    1.38
  -3   4  -2   29.86    1.39
   3  -4   2   30.66    1.36
   3  -4   2   32.98    1.58
   3  -4   2   32.08    0.88
   3  -4   2   31.92    1.53
   3  -4   2   33.40    1.48
   3  -4   2   32.69    0.87
   3  -4   2   31.75    1.02
   3  -4   2   31.92    1.43
  -4   4  -2    0.73    0.61
  -4   4  -2    2.32    0.66
  -4   4  -2    1.45    0.69
  -4   4  -2    1.17    0.84
   4  -4   2    1.04    0.72
   4  -4   2    1.56    0.74
   4  -4   2    1.37    0.59
   4  -4   2    1.51    0.67
   4  -4   2    1.85    0.76
   4  -4   2    1.93    0.45
  -5   4  -2    2.27    0.86
  -5   4  -2    3.00    1.18
  -5   4  -2    0.07    0.80
   5  -4   2    0.07    0.93
   5  -4   2    0.84    0.90
   5  -4   2    0.90    0.85
   5  -4   2    0.35    0.59
  -6   4  -2    1.64    0.32
  -6   4  -2    2.49    0.37
  -6   4  -2    2.50    1.08
  -6   4  -2    4.09    1.01
   6  -4   2    3.51    1.35
   6  -4   2    0.89    1.22
   6  -4   2    1.25    0.84
   6  -4   2    0.88    1.28
  -7   4  -2    0.39    1.22
  -7   4  -2    0.74    1.38
  -7   4  -2    2.59    1.41
   7  -4   2   -0.91    1.23
   7  -4   2   -1.05    1.66
   7  -4   2    0.41    1.73
   8   3  -2    3.43    1.88
   8   3  -2   -0.41    1.84
  -8  -3   2    0.99    1.68
  -8  -3   2   -3.24    1.59
  -8  -3   2   -1.49    1.83
   7   3  -2    1.31    1.34
   7   3  -2    4.39    1.59
   7   3  -2   -0.23    1.64
  -7  -3   2    3.40    1.28
  -7  -3   2    1.72    1.45
  -7  -3   2    2.08    1.30
   6   3  -2    2.08    1.95
   6   3  -2    0.86    0.97
   6   3  -2   -0.18    1.16
  -6  -3   2    0.40    0.84
  -6  -3   2    0.39    0.88
  -6  -3   2    0.14    0.88
  -6  -3   2    0.52    1.01
   5   3  -2    0.95    0.80
   5   3  -2    3.23    0.85
   5   3  -2    1.91    1.00
   5   3  -2    4.04    0.80
   5   3  -2    3.31    0.81
   5   3  -2    1.95    0.33
   5   3  -2    2.28    0.75
  -5  -3   2    4.01    0.84
  -5  -3   2    2.79    1.18
  -5  -3   2    1.70    0.78
  -5  -3   2    2.39    0.90
  -5  -3   2    2.65    0.69
  -5  -3   2    2.70    0.80
   4   3  -2   12.00    1.16
   4   3  -2   11.55    1.08
   4   3  -2   11.15    0.91
   4   3  -2   10.10    0.98
   4   3  -2    9.61    0.97
   4   3  -2   10.37    1.07
   4   3  -2   10.50    0.97
   4   3  -2   10.67    0.66
  -4  -3   2    9.92    1.19
  -4  -3   2   11.62    1.02
  -4  -3   2    9.99    1.03
  -4  -3   2   10.20    0.88
  -4  -3   2   10.18    0.94
  -4  -3   2   12.61    1.05
   3   3  -2    0.13    0.32
   3   3  -2    0.00    0.53
   3   3  -2    0.10    0.38
   3   3  -2    0.36    0.37
   3   3  -2    0.31    0.41
   3   3  -2    0.47    0.33
   3   3  -2    0.69    0.37
  -3  -3   2    0.32    0.35
  -3  -3   2    0.26    0.40
  -3  -3   2    0.09    0.36
  -3  -3   2    0.62    0.44
  -3  -3   2   -0.07    0.50
  -3  -3   2    0.60    0.38
   2   3  -2   12.88    0.72
   2   3  -2   11.99    0.86
   2   3  -2   11.67    0.75
   2   3  -2   13.89    0.72
   2   3  -2   12.51    0.75
   2   3  -2   13.02    0.66
  -2  -3   2   12.79    0.68
  -2  -3   2   12.77    0.77
  -2  -3   2   12.34    0.71
  -2  -3   2   13.29    0.91
  -2  -3   2   12.74    0.71
   1   3  -2    8.38    0.55
   1   3  -2    9.44    0.59
   1   3  -2    9.15    0.68
   1   3  -2    9.24    0.52
   1   3  -2    9.13    0.31
   1   3  -2    9.00    0.46
   1   3  -2    8.90    0.54
  -1  -3   2    9.59    0.57
  -1  -3   2    9.17    0.32
  -1  -3   2    8.37    0.52
  -1  -3   2    9.65    0.68
  -1  -3   2    9.23    0.61
   0   3  -2   13.78    0.59
   0   3  -2   12.76    0.64
   0   3  -2   12.57    0.48
   0   3  -2   12.47    0.71
   0  -3   2   13.09    0.48
   0  -3   2   12.65    0.59
   0  -3   2   13.12    0.73
   0  -3   2   13.23    0.70
   0  -3   2   13.05    0.59
  -1   3  -2   44.65    1.32
  -1   3  -2   41.66    1.40
  -1   3  -2   42.51    1.33
  -1   3  -2   43.67    1.29
  -1   3  -2   43.88    1.44
   1  -3   2   43.62    1.04
   1  -3   2   41.58    1.29
   1  -3   2   42.79    1.22
   1  -3   2   44.51    1.42
   1  -3   2   42.85    1.44
  -2   3  -2    1.26    0.38
  -2   3  -2    1.38    0.38
  -2   3  -2    0.94    0.29
   2  -3   2    0.88    0.41
   2  -3   2    0.89    0.33
   2  -3   2    1.20    0.36
   2  -3   2    0.96    0.31
  -3   3  -2   52.48    1.92
  -3   3  -2   49.49    1.71
  -3   3  -2   50.58    1.73
  -3   3  -2   46.06    1.75
   3  -3   2   50.87    1.87
   3  -3   2   48.53    1.22
   3  -3   2   47.84    1.77
   3  -3   2   49.01    1.73
   3  -3   2   48.62    1.72
   3  -3   2   50.60    1.92
  -4   3  -2   33.94    1.60
  -4   3  -2   36.93    1.54
  -4   3  -2   38.72    1.85
  -4   3  -2   36.41    1.57
   4  -3   2   35.58    1.62
   4  -3   2   36.90    1.76
   4  -3   2   33.56    0.87
   4  -3   2   35.54    1.65
   4  -3   2   35.84    1.69
  -5   3  -2    0.07    0.67
  -5   3  -2    0.19    0.83
  -5   3  -2    0.04    0.70
  -5   3  -2    1.26    1.03
  -5   3  -2    0.42    0.27
   5  -3   2    1.54    0.88
   5  -3   2    1.34    0.97
   5  -3   2    0.02    0.60
   5  -3   2    0.14    0.81
  -6   3  -2   -0.53    0.93
  -6   3  -2    1.12    1.01
  -6   3  -2    0.60    0.90
   6  -3   2    0.26    1.13
   6  -3   2    1.97    0.96
   6  -3   2    3.26    1.33
   6  -3   2    1.96    1.20
  -7   3  -2   -0.59    1.17
  -7   3  -2   -1.32    1.49
  -7   3  -2    0.48    1.29
   7  -3   2   -1.30    1.56
   7  -3   2   -1.97    1.12
   7  -3   2    2.96    1.72
  -8   3  -2    0.30    1.65
  -8   3  -2    4.85    2.08
   8  -3   2    1.75    1.86
   8  -3   2    0.71    2.18
   8   2  -2    1.78    1.84
   8   2  -2    2.77    1.92
  -8  -2   2   -0.90    1.59
  -8  -2   2    2.80    1.79
  -8  -2   2    3.89    1.84
   7   2  -2    0.66    1.25
   7   2  -2    0.20    1.45
   7   2  -2    1.69    1.39
  -7  -2   2    1.53    1.33
  -7  -2   2    3.63    1.21
  -7  -2   2    1.19    1.15
   6   2  -2   -2.43    0.97
   6   2  -2    0.67    0.86
   6   2  -2   -0.32    1.81
   6   2  -2    0.54    1.00
  -6  -2   2    0.53    0.81
  -6  -2   2    1.10    0.76
  -6  -2   2    0.99    0.99
   5   2  -2    6.79    0.82
   5   2  -2    8.43    1.12
   5   2  -2    7.02    0.36
   5   2  -2    9.22    1.11
   5   2  -2    7.67    1.02
   5   2  -2    6.13    1.02
  -5  -2   2    9.15    1.27
  -5  -2   2    6.96    0.95
  -5  -2   2    5.52    0.75
  -5  -2   2    7.68    1.13
  -5  -2   2    7.84    1.03
  -5  -2   2    7.43    0.92
   4   2  -2    1.45    0.27
   4   2  -2    2.02    0.52
   4   2  -2    1.22    0.43
   4   2  -2    1.19    0.50
   4   2  -2    1.50    0.58
   4   2  -2    1.08    0.52
   4   2  -2    1.68    0.66
   4   2  -2    1.31    0.47
  -4  -2   2    1.49    0.46
  -4  -2   2    1.29    0.50
  -4  -2   2    0.78    0.54
  -4  -2   2    1.38    0.54
  -4  -2   2    2.74    0.78
  -4  -2   2    1.21    0.54
   3   2  -2   14.38    0.86
   3   2  -2   15.69    0.83
   3   2  -2   14.76    0.80
   3   2  -2   16.20    0.84
   3   2  -2   17.82    1.05
   3   2  -2   15.73    0.94
   3   2  -2   15.66    0.63
   3   2  -2   14.27    0.93
  -3  -2   2   16.20    0.92
  -3  -2   2   16.29    0.92
  -3  -2   2   16.71    0.90
  -3  -2   2   14.83    0.93
  -3  -2   2   14.49    0.82
  -3  -2   2   16.32    1.03
   2   2  -2  166.43    4.08
   2   2  -2  173.11    4.18
   2   2  -2  174.31    4.17
   2   2  -2  170.74    4.22
   2   2  -2  165.76    4.05
   2   2  -2  175.61    4.25
   2   2  -2  168.73    4.24
  -2  -2   2  170.18    4.07
  -2  -2   2  172.24    4.17
  -2  -2   2  169.78    4.23
  -2  -2   2  160.44    4.26
  -2  -2   2  172.99    4.15
  -2  -2   2  169.56    4.16
   1   2  -2  236.79    5.31
   1   2  -2  234.12    5.49
   1   2  -2  244.84    5.43
   1   2  -2  232.96    5.42
   1   2  -2  236.61    5.47
  -1  -2   2  225.79    5.55
  -1  -2   2  233.34    5.45
  -1  -2   2  239.19    5.32
  -1  -2   2  237.72    5.44
  -1  -2   2  241.01    5.54
  -1  -2   2  224.90    5.45
   0   2  -2   79.67    1.95
   0   2  -2   81.66    2.06
   0   2  -2   75.70    2.03
   0   2  -2   79.95    1.89
   0  -2   2   76.04    2.05
   0  -2   2   77.45    1.95
   0  -2   2   76.84    1.88
   0  -2   2   80.86    2.07
  -1   2  -2  159.89    3.88
  -1   2  -2  168.48    3.84
  -1   2  -2  165.13    3.99
  -1   2  -2  163.22    3.86
  -1   2  -2  170.52    4.01
   1  -2   2  158.75    3.95
   1  -2   2  168.77    3.90
   1  -2   2  158.99    3.82
  -2   2  -2    1.48    0.40
  -2   2  -2    0.96    0.32
  -2   2  -2    1.01    0.29
  -2   2  -2    1.21    0.34
   2  -2   2    1.36    0.34
   2  -2   2    1.28    0.30
   2  -2   2    1.29    0.38
   2  -2   2    1.12    0.15
   2  -2   2    0.46    0.28
  -3   2  -2    1.31    0.52
  -3   2  -2    1.58    0.37
  -3   2  -2    1.32    0.36
  -3   2  -2    1.53    0.43
   3  -2   2    1.37    0.41
   3  -2   2    0.93    0.48
   3  -2   2    1.39    0.19
   3  -2   2    1.80    0.45
   3  -2   2    2.36    0.54
  -4   2  -2    0.10    0.50
  -4   2  -2    0.84    0.52
  -4   2  -2    1.16    0.72
  -4   2  -2    0.31    0.47
   4  -2   2    0.31    0.20
   4  -2   2   -0.07    0.53
   4  -2   2    0.00    0.53
   4  -2   2   -0.03    0.64
   4  -2   2    1.06    0.53
  -5   2  -2    0.96    0.71
  -5   2  -2    3.13    1.18
  -5   2  -2    0.58    0.70
  -5   2  -2    1.92    0.82
   5  -2   2    2.06    0.84
   5  -2   2    2.05    0.83
   5  -2   2    1.27    0.62
   5  -2   2    1.13    0.27
   5  -2   2    1.01    0.83
  -6   2  -2   -0.94    1.04
  -6   2  -2   -1.63    0.77
  -6   2  -2    0.04    0.87
   6  -2   2    2.17    1.13
   6  -2   2    0.03    0.98
   6  -2   2    0.11    1.22
   6  -2   2    0.12    0.87
  -7   2  -2   -1.19    1.28
  -7   2  -2   -1.20    1.00
  -7   2  -2    2.28    1.17
   7  -2   2   -1.66    1.63
   7  -2   2    1.11    1.34
   7  -2   2    0.50    1.23
  -8   2  -2   -0.68    1.76
  -8   2  -2   -3.77    1.74
  -8   2  -2    0.29    1.62
   8  -2   2    1.21    1.78
   8  -2   2   -3.41    1.98
   8   1  -2   -3.30    1.87
   8   1  -2   -0.57    1.86
  -8  -1   2   -1.04    1.50
  -8  -1   2    1.60    1.57
  -8  -1   2    0.43    1.82
   7   1  -2    0.55    1.30
   7   1  -2    1.09    1.37
   7   1  -2    0.12    1.27
  -7  -1   2   -0.44    1.34
  -7  -1   2   -0.49    1.07
  -7  -1   2    0.76    1.16
   6   1  -2    3.98    1.08
   6   1  -2    2.93    0.82
   6   1  -2    4.15    1.22
  -6  -1   2    2.20    1.71
  -6  -1   2    2.76    0.70
  -6  -1   2    2.95    0.92
  -6  -1   2    0.94    1.29
  -6  -1   2    3.62    1.09
   5   1  -2   -0.05    0.66
   5   1  -2    0.20    0.62
   5   1  -2    0.05    0.69
   5   1  -2    0.11    0.53
   5   1  -2    0.25    0.75
  -5  -1   2    1.32    0.77
  -5  -1   2   -1.16    0.55
  -5  -1   2    0.89    0.76
  -5  -1   2    0.72    0.46
  -5  -1   2    0.46    0.62
  -5  -1   2   -0.43    0.58
  -5  -1   2    1.70    1.00
   4   1  -2   37.97    1.72
   4   1  -2   37.31    1.40
   4   1  -2   39.12    1.66
   4   1  -2   37.04    1.56
   4   1  -2   38.60    1.02
   4   1  -2   38.28    1.54
  -4  -1   2   36.77    1.49
  -4  -1   2   39.10    1.58
  -4  -1   2   37.85    1.71
  -4  -1   2   29.88    1.81
  -4  -1   2   37.92    1.58
  -4  -1   2   35.14    1.68
   3   1  -2    0.86    0.36
   3   1  -2    0.23    0.35
   3   1  -2   -0.09    0.25
   3   1  -2    0.16    0.25
   3   1  -2   -0.15    0.39
   3   1  -2    0.10    0.16
   3   1  -2   -0.13    0.31
   3   1  -2   -0.07    0.33
  -3  -1   2    0.14    0.45
  -3  -1   2    0.17    0.25
  -3  -1   2    0.49    0.35
  -3  -1   2   -0.05    0.30
  -3  -1   2    0.37    0.36
  -3  -1   2    0.72    0.34
   2   1  -2   47.08    1.34
   2   1  -2   43.96    1.43
   2   1  -2   45.53    1.26
   2   1  -2   43.70    1.19
   2   1  -2   44.96    1.50
   2   1  -2   44.51    1.38
   2   1  -2   44.03    1.35
  -2  -1   2   46.04    1.40
  -2  -1   2   44.13    1.32
  -2  -1   2   45.33    1.32
  -2  -1   2   45.41    1.47
  -2  -1   2   44.08    1.41
   1   1  -2   88.45    2.19
   1   1  -2   90.17    2.09
   1   1  -2   89.60    2.23
   1   1  -2   89.80    2.13
   1   1  -2   89.76    2.17
   1   1  -2   86.29    2.14
  -1  -1   2   88.88    2.27
  -1  -1   2   90.96    2.03
  -1  -1   2   91.46    2.24
  -1  -1   2   88.91    2.20
  -1  -1   2   88.82    2.09
  -1  -1   2   88.49    2.20
  -1  -1   2   88.15    2.15
  -1  -1   2   89.84    2.20
   0   1  -2  216.67    4.79
   0   1  -2  213.51    4.70
   0   1  -2  210.37    4.71
   0   1  -2  202.11    4.75
   0   1  -2  207.33    4.63
   0  -1   2  212.53    4.71
   0  -1   2  214.52    4.77
   0  -1   2  201.16    4.78
   0  -1   2  212.37    4.70
  -1   1  -2   25.31    0.86
  -1   1  -2   28.12    0.86
  -1   1  -2   27.45    0.78
  -1   1  -2   26.98    0.94
   1  -1   2   26.15    0.77
   1  -1   2   27.97    0.79
   1  -1   2   26.99    0.85
   1  -1   2   28.64    0.89
   1  -1   2   27.30    0.95
  -2   1  -2    5.81    0.32
  -2   1  -2    5.88    0.43
  -2   1  -2    5.50    0.55
  -2   1  -2    5.26    0.49
   2  -1   2    5.61    0.46
   2  -1   2    5.16    0.51
   2  -1   2    5.48    0.48
   2  -1   2    4.79    0.54
   2  -1   2    4.87    0.31
  -3   1  -2    0.51    0.36
  -3   1  -2    0.07    0.18
  -3   1  -2    0.53    0.34
  -3   1  -2    0.27    0.30
  -3   1  -2    0.23    0.12
  -3   1  -2   -0.58    0.48
   3  -1   2    0.06    0.34
   3  -1   2    0.06    0.16
   3  -1   2   -0.54    0.42
   3  -1   2    0.21    0.34
   3  -1   2   -0.44    0.32
  -4   1  -2    0.60    0.68
  -4   1  -2    1.47    0.59
  -4   1  -2    1.39    0.31
  -4   1  -2    1.10    0.55
  -4   1  -2    0.64    0.49
   4  -1   2    0.98    0.68
   4  -1   2    1.76    0.55
   4  -1   2    1.25    0.53
   4  -1   2    0.84    0.34
   4  -1   2    1.55    0.57
  -5   1  -2    1.76    0.64
  -5   1  -2    1.17    0.37
  -5   1  -2    1.33    0.72
  -5   1  -2    0.48    0.71
  -5   1  -2    0.33    0.68
  -5   1  -2   -0.76    1.10
   5  -1   2    1.14    0.89
   5  -1   2    1.33    0.80
   5  -1   2    2.02    0.78
   5  -1   2    1.17    0.42
   5  -1   2    0.55    0.72
  -6   1  -2    1.66    1.00
  -6   1  -2    2.12    0.55
  -6   1  -2    2.56    0.89
  -6   1  -2    3.16    1.04
   6  -1   2    1.65    1.09
   6  -1   2    2.90    0.57
   6  -1   2    3.66    1.06
   6  -1   2    0.54    1.30
   6  -1   2    0.10    1.11
  -7   1  -2    1.54    1.17
  -7   1  -2    2.07    1.34
  -7   1  -2   -0.63    1.27
   7  -1   2   -0.56    1.30
   7  -1   2    0.16    1.61
   7  -1   2    1.85    1.58
  -8   1  -2    0.97    1.51
  -8   1  -2    3.53    1.83
  -8   1  -2    0.25    1.79
   8  -1   2   -0.01    2.00
   8  -1   2    0.30    2.13
   8   0  -2    2.96    2.15
   8   0  -2   -1.96    1.75
  -8   0   2    3.37    1.54
  -8   0   2    1.94    1.65
  -8   0   2    2.05    1.72
   7   0  -2   -1.39    1.16
   7   0  -2   -2.05    1.12
   7   0  -2    0.52    1.42
  -7   0   2    0.84    1.15
  -7   0   2    0.98    1.17
  -7   0   2   -1.13    1.13
   6   0  -2    2.25    1.03
   6   0  -2    0.47    0.71
   6   0  -2    1.92    0.95
   6   0  -2    0.42    0.97
  -6   0   2    1.27    1.31
  -6   0   2    1.80    0.99
  -6   0   2    1.05    0.54
  -6   0   2    0.93    0.87
   5   0  -2   -0.02    0.56
   5   0  -2    0.22    0.64
   5   0  -2    1.01    0.50
   5   0  -2    0.58    0.74
   5   0  -2   -0.76    0.63
  -5   0   2   -0.57    0.71
  -5   0   2    0.88    0.61
  -5   0   2   -1.38    0.78
  -5   0   2   -0.25    0.53
  -5   0   2    0.73    0.38
  -5   0   2    0.12    0.65
  -5   0   2    1.16    0.67
   4   0  -2    1.74    0.57
   4   0  -2    1.43    0.51
   4   0  -2    0.88    0.49
   4   0  -2    0.85    0.38
   4   0  -2    1.12    0.51
  -4   0   2    0.94    0.52
  -4   0   2    1.76    0.57
  -4   0   2    0.52    0.49
  -4   0   2    1.63    0.52
  -4   0   2    1.66    0.33
  -4   0   2    1.69    0.48
  -4   0   2    1.93    0.61
   3   0  -2    0.25    0.36
   3   0  -2    0.13    0.32
   3   0  -2   -0.08    0.28
   3   0  -2    0.71    0.31
   3   0  -2    0.00    0.13
   3   0  -2   -0.01    0.21
  -3   0   2    0.03    0.39
  -3   0   2    0.33    0.30
  -3   0   2    0.14    0.15
  -3   0   2   -0.01    0.30
  -3   0   2    0.16    0.31
  -3   0   2   -0.20    0.22
  -3   0   2   -0.62    0.29
  -3   0   2   -0.37    0.31
   2   0  -2   98.47    2.39
   2   0  -2  105.58    2.62
   2   0  -2  102.47    2.43
   2   0  -2  103.53    2.58
   2   0  -2  100.72    2.36
   2   0  -2   98.64    2.73
   2   0  -2  100.91    2.63
  -2   0   2  106.25    2.68
  -2   0   2  100.13    2.46
  -2   0   2  101.23    2.55
  -2   0   2   98.33    2.56
  -2   0   2   98.25    2.60
  -2   0   2  103.31    2.40
  -2   0   2  102.27    2.73
  -2   0   2  101.58    2.61
  -2   0   2   98.31    2.44
   1   0  -2   -0.36    0.09
   1   0  -2   -0.41    0.11
   1   0  -2   -0.45    0.08
   1   0  -2   -0.52    0.12
   1   0  -2   -0.32    0.12
  -1   0   2   -0.40    0.07
  -1   0   2   -0.33    0.09
  -1   0   2   -0.47    0.11
  -1   0   2   -0.43    0.06
  -1   0   2   -0.59    0.10
  -1   0   2   -0.40    0.08
  -1   0   2   -0.42    0.11
  -1   0   2   -0.35    0.11
   0   0  -2  111.68    2.60
   0   0  -2  114.28    2.56
   0   0  -2  114.50    2.62
   0   0  -2  113.08    2.56
   0   0   2  119.79    2.66
  -1   0  -2   -0.03    0.07
  -1   0  -2   -0.07    0.19
  -1   0  -2    0.08    0.10
  -1   0  -2    0.17    0.15
  -1   0  -2    0.06    0.12
   1   0   2    0.14    0.20
   1   0   2    0.20    0.15
   1   0   2   -0.08    0.12
   1   0   2    0.01    0.11
   1   0   2    0.10    0.08
  -2   0  -2    5.60    0.37
  -2   0  -2    5.72    0.46
  -2   0  -2    5.59    0.24
  -2   0  -2    6.83    0.53
  -2   0  -2    6.40    0.60
   2   0   2    5.88    0.50
   2   0   2    5.78    0.36
   2   0   2    6.31    0.59
   2   0   2    5.89    0.47
  -3   0  -2   -0.14    0.21
  -3   0  -2    0.26    0.37
  -3   0  -2    0.24    0.30
  -3   0  -2   -0.26    0.31
  -3   0  -2   -0.55    0.47
  -3   0  -2   -0.52    0.27
   3   0   2    0.05    0.26
   3   0   2   -0.16    0.32
   3   0   2    0.29    0.23
   3   0   2    0.11    0.31
   3   0   2   -0.01    0.41
  -4   0  -2   14.11    0.76
  -4   0  -2   11.90    1.24
  -4   0  -2   12.87    1.00
  -4   0  -2   14.17    1.04
  -4   0  -2   13.18    0.96
  -4   0  -2   15.91    1.01
   4   0   2   12.07    1.05
   4   0   2   13.13    1.27
   4   0   2   12.19    0.92
   4   0   2   13.62    0.77
   4   0   2   12.43    1.01
  -5   0  -2    1.49    0.72
  -5   0  -2   -0.39    1.04
  -5   0  -2    0.08    0.57
  -5   0  -2   -0.07    0.43
  -5   0  -2    0.16    0.68
  -5   0  -2   -1.23    0.70
   5   0   2    0.13    0.44
   5   0   2    0.03    0.94
   5   0   2   -0.18    0.71
   5   0   2    1.88    0.79
   5   0   2    0.04    0.72
  -6   0  -2    1.10    0.86
  -6   0  -2    1.77    0.93
  -6   0  -2    1.98    0.96
  -6   0  -2    0.00    0.55
   6   0   2    1.94    1.13
   6   0   2    1.18    0.63
   6   0   2    1.90    0.92
   6   0   2    2.45    1.01
  -7   0  -2   -0.31    1.07
  -7   0  -2   -2.78    1.41
  -7   0  -2    1.75    1.40
   7   0   2   -0.77    1.35
   7   0   2   -1.26    1.66
   7   0   2    0.42    1.36
   7   0   2    0.99    0.77
  -8   0  -2   -1.72    1.41
  -8   0  -2    0.00    1.66
  -8   0  -2    2.81    1.94
   8   0   2   -0.33    1.89
   8   0   2    4.64    2.11
   8  -1  -2    0.70    2.09
   8  -1  -2   -2.72    1.56
  -8   1   2    1.98    1.63
  -8   1   2   -0.31    1.65
  -8   1   2   -0.90    1.59
   7  -1  -2    0.79    1.33
   7  -1  -2   -2.25    1.13
  -7   1   2    0.10    1.11
  -7   1   2    1.08    1.12
  -7   1   2    1.69    1.09
   6  -1  -2    3.29    0.86
   6  -1  -2    2.01    1.05
   6  -1  -2    4.09    1.14
  -6   1   2    3.21    0.47
  -6   1   2    3.50    0.94
  -6   1   2    2.33    1.29
  -6   1   2    2.85    0.97
  -6   1   2    3.28    1.00
   5  -1  -2    0.26    0.70
   5  -1  -2    0.63    0.60
   5  -1  -2    0.64    0.74
   5  -1  -2    0.37    0.44
   5  -1  -2   -0.13    0.60
  -5   1   2   -0.12    0.86
  -5   1   2   -0.55    0.77
  -5   1   2   -1.15    0.59
  -5   1   2    0.47    0.32
  -5   1   2   -0.16    0.62
  -5   1   2   -0.02    0.72
  -5   1   2    0.32    0.58
   4  -1  -2   40.20    1.26
   4  -1  -2   38.24    1.56
   4  -1  -2   40.99    1.60
   4  -1  -2   37.56    1.73
   4  -1  -2   38.67    1.36
  -4   1   2   39.78    1.65
  -4   1   2   38.63    1.09
  -4   1   2   38.87    1.60
  -4   1   2   36.90    1.16
  -4   1   2   38.56    1.58
  -4   1   2   39.73    1.48
  -4   1   2   40.31    1.67
  -4   1   2   38.02    1.74
   3  -1  -2    0.47    0.20
   3  -1  -2   -0.07    0.25
   3  -1  -2    0.05    0.30
   3  -1  -2    0.10    0.29
   3  -1  -2   -0.08    0.36
  -3   1   2    0.64    0.32
  -3   1   2   -0.12    0.16
  -3   1   2    0.21    0.34
  -3   1   2    0.44    0.34
  -3   1   2    0.17    0.30
  -3   1   2    0.48    0.27
  -3   1   2    0.29    0.16
  -3   1   2   -0.41    0.29
   2  -1  -2   44.49    1.21
   2  -1  -2   44.75    1.42
   2  -1  -2   45.56    1.49
   2  -1  -2   43.22    1.34
   2  -1  -2   45.88    1.38
  -2   1   2   45.12    1.41
  -2   1   2   43.80    1.17
  -2   1   2   43.07    1.37
  -2   1   2   43.62    1.25
  -2   1   2   44.19    1.20
  -2   1   2   45.01    1.48
  -2   1   2   44.77    1.33
  -2   1   2   45.92    1.37
   1  -1  -2   89.08    2.27
   1  -1  -2   86.40    2.23
   1  -1  -2   88.47    2.18
   1  -1  -2   91.88    2.24
   1  -1  -2   85.58    2.18
   1  -1  -2   90.15    2.17
  -1   1   2   91.35    2.19
  -1   1   2   92.92    2.28
  -1   1   2   91.11    2.19
  -1   1   2   89.29    2.11
  -1   1   2   89.20    2.24
  -1   1   2   89.15    2.16
  -1   1   2   93.45    2.24
   0  -1  -2  212.13    4.82
   0  -1  -2  205.69    4.78
   0  -1  -2  225.24    4.81
   0  -1  -2  204.14    4.73
   0  -1  -2  216.67    4.71
   0  -1  -2  216.97    4.70
   0   1   2  210.93    4.79
   0   1   2  210.67    4.80
   0   1   2  210.50    4.73
   0   1   2  209.82    4.71
   0   1   2  214.30    4.67
   0   1   2  212.69    4.78
   0   1   2  204.79    4.73
  -1  -1  -2   26.35    0.76
  -1  -1  -2   27.34    0.95
  -1  -1  -2   27.82    0.86
  -1  -1  -2   25.59    0.87
  -1  -1  -2   26.48    0.86
  -1  -1  -2   27.49    0.76
   1   1   2   27.25    0.86
   1   1   2   27.25    0.88
   1   1   2   26.10    0.84
   1   1   2   26.00    0.75
   1   1   2   27.56    0.97
  -2  -1  -2    5.18    0.41
  -2  -1  -2    6.10    0.61
  -2  -1  -2    4.81    0.48
  -2  -1  -2    5.67    0.51
  -2  -1  -2    5.23    0.41
   2   1   2    4.38    0.43
   2   1   2    4.99    0.44
   2   1   2    4.71    0.58
   2   1   2    4.70    0.49
   2   1   2    5.73    0.48
   2   1   2    5.14    0.25
  -3  -1  -2    0.15    0.38
  -3  -1  -2    0.28    0.54
  -3  -1  -2    0.46    0.39
  -3  -1  -2    0.30    0.24
  -3  -1  -2    0.09    0.29
   3   1   2   -0.38    0.45
   3   1   2    0.24    0.36
   3   1   2    0.21    0.09
   3   1   2    0.02    0.32
   3   1   2    0.08    0.35
   3   1   2    0.20    0.28
  -4  -1  -2    0.67    0.53
  -4  -1  -2    1.22    0.56
  -4  -1  -2    1.06    0.40
  -4  -1  -2    1.72    0.77
  -4  -1  -2    0.70    0.53
   4   1   2    1.26    0.42
   4   1   2    1.05    0.69
   4   1   2    1.87    0.52
   4   1   2    0.76    0.52
  -5  -1  -2    1.50    0.64
  -5  -1  -2    1.55    0.74
  -5  -1  -2    1.74    0.53
  -5  -1  -2    1.88    0.80
  -5  -1  -2    2.76    1.10
  -5  -1  -2    0.35    0.58
   5   1   2    2.13    0.73
   5   1   2    0.50    0.78
   5   1   2    2.20    0.57
   5   1   2    1.66    0.81
   5   1   2    1.00    1.11
  -6  -1  -2    3.00    0.89
  -6  -1  -2    2.21    1.03
  -6  -1  -2    2.82    0.76
  -6  -1  -2    4.16    1.06
   6   1   2    1.81    1.39
   6   1   2    3.42    0.75
   6   1   2    0.77    0.99
   6   1   2    3.45    1.30
  -7  -1  -2   -0.08    1.30
  -7  -1  -2   -0.91    1.22
  -7  -1  -2    0.12    1.09
   7   1   2   -1.33    1.26
   7   1   2    0.81    1.42
   7   1   2    1.01    1.83
   7   1   2    0.40    0.95
  -8  -1  -2    5.15    1.66
  -8  -1  -2    1.97    1.84
  -8  -1  -2    1.14    1.52
   8   1   2    1.21    1.85
   8   1   2    1.66    1.87
   8   1   2   -4.40    2.73
   8  -2  -2    3.74    1.81
   8  -2  -2    1.44    2.02
  -8   2   2    2.41    1.56
  -8   2   2    0.34    1.59
  -8   2   2   -0.51    1.68
   7  -2  -2    0.81    1.57
   7  -2  -2   -0.59    1.11
  -7   2   2    1.09    1.21
  -7   2   2    1.13    1.17
  -7   2   2    1.22    1.15
   6  -2  -2   -0.58    1.03
   6  -2  -2    0.16    0.50
   6  -2  -2    0.39    0.82
   6  -2  -2   -0.36    0.60
  -6   2   2    0.01    1.37
  -6   2   2   -0.41    0.87
  -6   2   2    0.35    0.84
  -6   2   2    0.15    0.78
   5  -2  -2    7.55    1.07
   5  -2  -2    7.54    0.71
   5  -2  -2    7.16    1.00
   5  -2  -2    7.21    0.91
   5  -2  -2    6.50    0.65
  -5   2   2    6.34    0.48
  -5   2   2    7.85    0.97
  -5   2   2    7.66    0.39
  -5   2   2    4.70    1.07
  -5   2   2    7.47    0.88
  -5   2   2    6.56    0.95
  -5   2   2    7.03    1.03
  -5   2   2    8.23    1.09
   4  -2  -2    0.99    0.36
   4  -2  -2    1.33    0.33
   4  -2  -2    2.10    0.64
   4  -2  -2    1.77    0.56
   4  -2  -2    1.06    0.49
  -4   2   2    1.39    0.19
  -4   2   2    0.93    0.39
  -4   2   2    1.06    0.45
  -4   2   2    1.50    0.63
  -4   2   2    1.51    0.66
  -4   2   2    1.43    0.49
  -4   2   2    1.39    0.29
  -4   2   2    2.39    0.60
   3  -2  -2   15.90    0.89
   3  -2  -2   15.74    0.55
   3  -2  -2   14.75    0.93
   3  -2  -2   15.17    0.98
   3  -2  -2   15.40    0.84
   3  -2  -2   15.71    0.53
  -3   2   2   15.67    0.65
  -3   2   2   14.89    0.48
  -3   2   2   15.83    0.91
  -3   2   2   15.56    0.91
  -3   2   2   17.28    0.88
  -3   2   2   15.50    0.72
  -3   2   2   16.76    0.96
   2  -2  -2  164.21    4.11
   2  -2  -2  166.11    4.08
   2  -2  -2  167.18    4.19
   2  -2  -2  151.68    4.04
  -2   2   2  160.30    3.81
  -2   2   2  168.59    4.16
  -2   2   2  168.63    3.90
  -2   2   2  163.34    4.07
  -2   2   2  165.62    4.13
  -2   2   2  165.53    3.86
  -2   2   2  168.51    3.94
  -2   2   2  168.81    4.12
  -2   2   2  168.71    3.72
   1  -2  -2  233.06    5.31
   1  -2  -2  237.58    5.28
   1  -2  -2  232.56    5.44
  -1   2   2  231.45    5.48
  -1   2   2  231.74    5.27
  -1   2   2  233.58    5.22
  -1   2   2  237.77    5.44
  -1   2   2  242.90    5.47
  -1   2   2  234.53    5.20
  -1   2   2  233.06    5.39
  -1   2   2  237.14    5.32
   0  -2  -2   78.22    2.04
   0  -2  -2   80.52    1.84
   0  -2  -2   81.01    1.97
   0  -2  -2   78.14    2.00
   0  -2  -2   79.03    1.85
   0  -2  -2   78.89    1.94
   0  -2  -2   81.24    2.00
   0   2   2   80.81    1.84
   0   2   2   80.72    1.86
   0   2   2   79.83    2.01
   0   2   2   82.64    2.05
   0   2   2   79.60    1.96
   0   2   2   78.41    1.99
  -1  -2  -2  165.13    3.92
  -1  -2  -2  157.61    3.90
  -1  -2  -2  166.14    3.90
  -1  -2  -2  159.38    4.00
  -1  -2  -2  168.88    3.76
   1   2   2  160.65    4.07
   1   2   2  163.23    3.90
   1   2   2  162.07    3.68
   1   2   2  168.53    3.76
   1   2   2  158.23    3.93
   1   2   2  168.48    3.93
  -2  -2  -2    1.17    0.36
  -2  -2  -2    0.91    0.42
  -2  -2  -2    0.91    0.26
  -2  -2  -2    1.19    0.26
  -2  -2  -2    1.22    0.35
  -2  -2  -2    1.37    0.25
   2   2   2    1.53    0.42
   2   2   2    1.59    0.23
   2   2   2    1.39    0.27
   2   2   2    1.70    0.31
   2   2   2    1.42    0.40
   2   2   2    1.23    0.30
   2   2   2    1.73    0.48
  -3  -2  -2    0.26    0.52
  -3  -2  -2    1.64    0.40
  -3  -2  -2    1.06    0.33
  -3  -2  -2    1.40    0.45
  -3  -2  -2    1.81    0.50
   3   2   2    1.67    0.48
   3   2   2    1.37    0.21
   3   2   2    1.55    0.60
   3   2   2    1.54    0.43
   3   2   2    1.89    0.46
   3   2   2    1.62    0.38
  -4  -2  -2    0.46    0.41
  -4  -2  -2    0.51    0.48
  -4  -2  -2    0.62    0.40
  -4  -2  -2    0.16    0.48
  -4  -2  -2    0.01    0.57
  -4  -2  -2    1.06    0.74
   4   2   2   -0.76    0.58
   4   2   2    0.99    0.50
   4   2   2    0.35    0.44
   4   2   2    0.30    0.75
   4   2   2    0.90    0.54
  -5  -2  -2   -0.63    1.17
  -5  -2  -2    1.15    0.63
  -5  -2  -2    2.81    0.64
  -5  -2  -2    2.12    0.78
  -5  -2  -2    0.85    0.66
   5   2   2    1.93    0.63
   5   2   2    2.18    0.81
   5   2   2    1.24    0.77
   5   2   2    0.53    0.96
  -6  -2  -2    0.45    1.09
  -6  -2  -2    1.01    0.79
  -6  -2  -2    0.84    0.87
  -6  -2  -2    1.53    0.88
   6   2   2    1.40    0.77
   6   2   2    0.71    0.93
   6   2   2    0.25    1.36
  -7  -2  -2    2.08    1.30
  -7  -2  -2    1.05    1.21
  -7  -2  -2   -1.53    1.38
   7   2   2    1.46    1.32
   7   2   2    0.36    1.04
   7   2   2    0.42    1.92
   7   2   2    1.33    1.31
  -8  -2  -2   -0.19    1.96
  -8  -2  -2    0.64    1.71
  -8  -2  -2   -0.55    1.64
   8   2   2    3.76    2.61
   8   2   2   -3.55    1.90
   8   2   2   -2.93    2.01
   8  -3  -2    3.93    1.84
   8  -3  -2    0.89    2.04
  -8   3   2    2.80    1.69
  -8   3   2   -0.76    1.82
  -8   3   2   -2.01    1.60
   7  -3  -2    4.77    1.78
  -7   3   2    1.28    1.30
  -7   3   2    1.56    1.34
  -7   3   2    1.27    1.32
   6  -3  -2   -1.62    1.04
   6  -3  -2    1.39    0.97
  -6   3   2    1.46    0.98
  -6   3   2   -2.14    0.82
  -6   3   2    0.09    0.33
  -6   3   2   -1.89    0.83
  -6   3   2   -1.08    1.39
   5  -3  -2    3.93    0.94
   5  -3  -2    3.47    0.70
   5  -3  -2    3.07    0.87
   5  -3  -2    2.49    0.38
   5  -3  -2    2.70    0.36
  -5   3   2    3.68    0.75
  -5   3   2    2.34    0.99
  -5   3   2    2.26    0.42
  -5   3   2    3.10    0.74
  -5   3   2    3.48    0.77
   4  -3  -2   10.19    1.03
   4  -3  -2   10.50    0.93
   4  -3  -2   10.07    0.53
   4  -3  -2    9.57    0.99
   4  -3  -2    8.72    0.93
   4  -3  -2    9.99    0.50
  -4   3   2    9.08    0.95
  -4   3   2   10.53    0.65
  -4   3   2   10.29    1.01
  -4   3   2    9.46    0.80
  -4   3   2    9.80    0.98
  -4   3   2   10.93    1.09
   3  -3  -2    0.43    0.42
   3  -3  -2    0.52    0.13
   3  -3  -2    0.09    0.29
   3  -3  -2    0.25    0.38
   3  -3  -2    0.59    0.42
  -3   3   2    0.54    0.32
  -3   3   2    0.17    0.37
  -3   3   2   -0.21    0.37
  -3   3   2    0.43    0.37
  -3   3   2    0.47    0.28
  -3   3   2    0.38    0.37
   2  -3  -2   11.39    0.73
   2  -3  -2   11.38    0.54
   2  -3  -2   12.02    0.76
  -2   3   2   11.26    0.56
  -2   3   2   11.11    0.57
  -2   3   2   11.32    0.42
  -2   3   2   12.16    0.60
  -2   3   2   12.59    0.75
  -2   3   2   12.41    0.75
  -2   3   2   12.21    0.77
  -2   3   2   11.26    0.73
   1  -3  -2    9.20    0.36
   1  -3  -2    8.48    0.50
   1  -3  -2    9.10    0.58
   1  -3  -2    8.74    0.41
   1  -3  -2    8.94    0.37
   1  -3  -2    8.47    0.53
  -1   3   2    9.04    0.48
  -1   3   2    7.93    0.39
  -1   3   2    8.56    0.55
  -1   3   2    8.51    0.55
  -1   3   2    9.10    0.42
  -1   3   2    9.02    0.48
  -1   3   2    8.93    0.45
   0  -3  -2   11.95    0.63
   0  -3  -2   13.35    0.58
   0  -3  -2   13.23    0.63
   0  -3  -2   13.55    0.49
   0  -3  -2   12.43    0.41
   0  -3  -2   12.74    0.58
   0  -3  -2   13.09    0.62
   0   3   2   13.30    0.63
   0   3   2   11.95    0.57
   0   3   2   12.90    0.48
   0   3   2   11.54    0.66
   0   3   2   14.14    0.65
  -1  -3  -2   41.85    1.37
  -1  -3  -2   43.82    1.34
  -1  -3  -2   46.22    1.50
  -1  -3  -2   43.44    1.04
  -1  -3  -2   43.13    1.21
  -1  -3  -2   43.65    1.36
  -1  -3  -2   43.56    1.40
   1   3   2   43.00    1.21
   1   3   2   42.82    1.35
   1   3   2   43.05    1.38
   1   3   2   43.46    1.52
   1   3   2   45.58    1.40
  -2  -3  -2    1.52    0.49
  -2  -3  -2    1.29    0.30
  -2  -3  -2    1.29    0.29
  -2  -3  -2    0.87    0.33
  -2  -3  -2    1.32    0.36
  -2  -3  -2    0.98    0.24
   2   3   2    0.93    0.24
   2   3   2    1.16    0.35
   2   3   2    0.51    0.51
   2   3   2    0.51    0.31
   2   3   2    0.52    0.30
   2   3   2    1.03    0.29
  -3  -3  -2   47.84    1.64
  -3  -3  -2   50.86    1.71
  -3  -3  -2   48.84    1.95
  -3  -3  -2   47.52    1.83
  -3  -3  -2   46.55    1.60
  -3  -3  -2   52.62    1.81
   3   3   2   50.31    1.76
   3   3   2   48.95    1.72
   3   3   2   49.00    2.04
   3   3   2   47.88    1.64
   3   3   2   51.83    1.80
   3   3   2   50.60    1.64
  -4  -3  -2   34.84    1.66
  -4  -3  -2   37.73    1.61
  -4  -3  -2   38.59    1.59
  -4  -3  -2   36.29    1.92
  -4  -3  -2   36.68    1.56
  -4  -3  -2   36.56    1.76
   4   3   2   34.30    1.98
   4   3   2   36.35    1.67
   4   3   2   40.80    1.69
   4   3   2   37.91    1.66
   4   3   2   35.16    1.55
   4   3   2   36.96    1.07
  -5  -3  -2   -0.42    0.75
  -5  -3  -2   -0.19    0.69
  -5  -3  -2    0.47    0.71
  -5  -3  -2    0.83    0.67
  -5  -3  -2    0.28    0.66
   5   3   2    1.05    0.65
   5   3   2   -0.43    0.68
   5   3   2    0.52    1.01
   5   3   2   -1.38    0.76
  -6  -3  -2    0.82    0.84
  -6  -3  -2    1.87    1.12
  -6  -3  -2    3.92    1.03
  -6  -3  -2    0.36    0.99
   6   3   2    1.58    0.88
   6   3   2    1.70    0.95
   6   3   2   -0.06    1.35
  -7  -3  -2    0.29    1.21
  -7  -3  -2   -0.12    1.29
  -7  -3  -2   -0.22    1.50
   7   3   2   -1.46    1.06
   7   3   2    1.23    2.08
   7   3   2    2.95    1.48
   7   3   2   -1.04    1.32
  -8  -3  -2    3.41    1.69
  -8  -3  -2    4.57    2.39
  -8  -3  -2    1.33    1.77
   8   3   2    2.25    2.06
   8   3   2    3.08    2.71
   8   3   2   -1.30    1.86
   7  -4  -2    1.73    1.71
   7  -4  -2   -0.93    1.20
  -7   4   2    1.18    1.21
  -7   4   2   -1.08    1.26
  -7   4   2   -0.25    1.18
   6  -4  -2    0.06    1.17
   6  -4  -2    1.18    0.85
  -6   4   2   -0.25    0.87
  -6   4   2   -0.29    0.90
  -6   4   2    0.48    0.93
  -6   4   2   -1.41    1.38
  -6   4   2   -0.25    0.47
   5  -4  -2    6.80    0.88
   5  -4  -2    6.68    1.12
  -5   4   2    5.89    1.02
  -5   4   2    7.19    0.89
  -5   4   2    6.21    1.14
  -5   4   2    4.65    0.70
   4  -4  -2    6.88    0.98
   4  -4  -2    8.93    0.84
   4  -4  -2    9.09    1.02
   4  -4  -2    9.59    1.03
  -4   4   2    5.05    0.84
  -4   4   2    6.87    0.73
  -4   4   2    7.26    0.91
  -4   4   2    7.28    0.89
  -4   4   2    7.54    0.70
   3  -4  -2    2.52    0.58
   3  -4  -2    2.49    0.61
   3  -4  -2    3.20    0.43
   3  -4  -2    2.42    0.25
  -3   4   2    2.31    0.51
  -3   4   2    3.65    0.61
  -3   4   2    2.59    0.56
  -3   4   2    2.37    0.57
  -3   4   2    3.09    0.63
  -3   4   2    1.84    0.45
   2  -4  -2  209.90    5.35
   2  -4  -2  219.47    4.86
   2  -4  -2  217.68    4.96
   2  -4  -2  215.47    4.87
   2  -4  -2  216.58    4.90
   2  -4  -2  209.91    5.34
  -2   4   2  209.49    5.38
  -2   4   2  214.13    4.96
  -2   4   2  214.25    5.15
  -2   4   2  222.50    5.15
  -2   4   2  210.02    5.33
  -2   4   2  216.60    4.91
  -2   4   2  224.18    5.38
   1  -4  -2   15.73    0.82
   1  -4  -2   16.94    0.72
   1  -4  -2   16.40    0.66
   1  -4  -2   15.56    0.75
   1  -4  -2   16.31    0.87
   1  -4  -2   16.79    0.67
  -1   4   2   15.56    0.92
  -1   4   2   16.67    0.83
  -1   4   2   16.67    0.69
  -1   4   2   17.42    0.78
  -1   4   2   15.98    0.58
   0  -4  -2  206.68    5.60
   0  -4  -2  242.03    5.75
   0  -4  -2  240.79    5.72
   0  -4  -2  242.24    5.40
   0  -4  -2  247.58    5.66
   0  -4  -2  243.79    5.72
   0   4   2  260.77    5.73
   0   4   2  236.29    5.50
   0   4   2  237.78    5.69
   0   4   2  245.53    5.67
   0   4   2  238.11    5.80
  -1  -4  -2   67.83    2.03
  -1  -4  -2   67.42    1.95
  -1  -4  -2   67.27    2.05
  -1  -4  -2   68.03    2.15
  -1  -4  -2   68.62    1.59
  -1  -4  -2   69.55    1.84
   1   4   2   69.48    2.07
   1   4   2   67.96    1.92
   1   4   2   66.72    2.03
   1   4   2   71.62    2.05
   1   4   2   69.60    1.84
   1   4   2   67.86    2.17
  -2  -4  -2   12.61    1.01
  -2  -4  -2   10.86    0.63
  -2  -4  -2   13.24    0.89
  -2  -4  -2   10.89    0.54
  -2  -4  -2   12.34    0.78
  -2  -4  -2   10.62    0.69
  -2  -4  -2   12.38    0.80
   2   4   2   12.25    0.81
   2   4   2    9.17    1.00
   2   4   2   11.95    0.55
   2   4   2   11.68    0.64
   2   4   2   10.69    0.80
   2   4   2   11.92    0.72
  -3  -4  -2   34.48    1.48
  -3  -4  -2   30.85    1.21
  -3  -4  -2   31.39    1.37
  -3  -4  -2   30.08    1.64
  -3  -4  -2   31.40    1.51
  -3  -4  -2   31.89    1.28
   3   4   2   31.53    1.42
   3   4   2   32.99    1.31
   3   4   2   32.35    1.25
   3   4   2   29.99    1.70
   3   4   2   33.27    1.42
   3   4   2   33.24    1.42
  -4  -4  -2    2.12    0.89
  -4  -4  -2    2.88    0.59
  -4  -4  -2    1.72    0.63
  -4  -4  -2    2.01    0.70
  -4  -4  -2    1.34    0.57
  -4  -4  -2    2.12    0.63
   4   4   2    1.59    0.38
   4   4   2    2.69    0.64
   4   4   2    1.80    0.56
   4   4   2    2.73    1.02
   4   4   2    1.60    0.59
   4   4   2    1.67    0.71
   4   4   2    1.20    0.51
  -5  -4  -2    1.55    0.73
  -5  -4  -2   -0.47    0.78
  -5  -4  -2    0.63    0.92
  -5  -4  -2    0.94    0.77
  -5  -4  -2    0.01    0.74
   5   4   2    0.53    0.32
   5   4   2    0.09    1.30
   5   4   2   -0.95    0.72
   5   4   2    1.35    0.76
  -6  -4  -2    3.27    1.23
  -6  -4  -2    2.39    0.94
  -6  -4  -2    1.23    1.04
   6   4   2    1.69    1.01
   6   4   2    2.51    1.16
  -7  -4  -2   -0.11    1.21
  -7  -4  -2   -0.76    1.30
  -7  -4  -2    1.45    1.57
   7   4   2   -0.80    1.92
   7   4   2   -1.91    1.08
   7   4   2   -0.24    1.32
   7   4   2    0.03    1.56
   7  -5  -2    1.24    1.30
   7  -5  -2   -4.25    1.67
  -7   5   2    0.06    1.20
  -7   5   2   -0.15    1.20
  -7   5   2    1.58    1.47
   6  -5  -2    2.65    0.92
   6  -5  -2    2.22    1.33
  -6   5   2    1.67    1.02
  -6   5   2    2.65    0.67
  -6   5   2    3.33    1.70
   5  -5  -2   -0.13    0.86
   5  -5  -2    0.43    0.60
   5  -5  -2    0.30    1.09
  -5   5   2    0.40    0.62
  -5   5   2   -0.10    0.54
  -5   5   2   -0.43    0.84
  -5   5   2    1.11    1.04
   4  -5  -2    6.04    0.88
   4  -5  -2    4.58    0.90
   4  -5  -2    4.58    0.59
  -4   5   2    5.12    0.78
  -4   5   2    6.17    0.85
  -4   5   2    5.48    0.90
  -4   5   2    4.95    1.03
  -4   5   2    4.78    0.67
  -4   5   2    4.92    0.85
   3  -5  -2   11.23    0.67
   3  -5  -2   11.33    0.56
   3  -5  -2   11.39    1.05
   3  -5  -2   10.64    0.54
   3  -5  -2    9.69    0.96
  -3   5   2   11.54    0.95
  -3   5   2    9.93    0.94
  -3   5   2   10.58    0.41
  -3   5   2   10.60    0.90
  -3   5   2    9.38    1.04
   2  -5  -2   30.42    1.02
   2  -5  -2   28.78    1.35
   2  -5  -2   31.53    1.06
   2  -5  -2   30.73    1.32
   2  -5  -2   30.58    0.99
  -2   5   2   31.76    1.39
  -2   5   2   30.13    0.95
  -2   5   2   30.04    1.23
  -2   5   2   30.56    1.33
  -2   5   2   31.36    1.02
  -2   5   2   31.61    1.39
  -2   5   2   31.40    1.30
   1  -5  -2    1.95    0.47
   1  -5  -2    1.22    0.39
   1  -5  -2    2.25    0.42
   1  -5  -2    2.11    0.33
   1  -5  -2    1.06    0.34
   1  -5  -2    1.11    0.42
  -1   5   2    1.86    0.38
  -1   5   2    0.66    0.40
  -1   5   2    1.23    0.31
  -1   5   2    1.37    0.48
  -1   5   2    1.24    0.41
   0  -5  -2   24.06    1.11
   0  -5  -2   21.04    1.00
   0  -5  -2   21.30    0.84
   0  -5  -2   20.86    0.97
   0  -5  -2   20.32    1.00
   0  -5  -2   21.02    0.72
   0  -5  -2   20.99    0.95
   0   5   2   23.08    1.01
   0   5   2   21.49    0.95
   0   5   2   19.23    1.09
   0   5   2   21.81    0.85
   0   5   2   22.05    1.00
  -1  -5  -2   -0.12    0.42
  -1  -5  -2   -0.06    0.23
  -1  -5  -2   -0.07    0.24
  -1  -5  -2    0.36    0.12
  -1  -5  -2    0.26    0.37
  -1  -5  -2   -0.15    0.32
   1   5   2   -0.17    0.30
   1   5   2    0.54    0.53
   1   5   2   -0.14    0.24
   1   5   2    0.58    0.37
   1   5   2    0.26    0.35
   1   5   2    0.15    0.32
  -2  -5  -2   50.14    1.38
  -2  -5  -2   50.66    1.79
  -2  -5  -2   49.67    1.89
  -2  -5  -2   52.68    1.64
  -2  -5  -2   49.37    2.00
  -2  -5  -2   49.38    1.79
  -2  -5  -2   49.48    1.65
   2   5   2   48.56    1.81
   2   5   2   48.55    2.10
   2   5   2   47.73    1.72
   2   5   2   51.25    1.63
   2   5   2   47.26    1.78
  -3  -5  -2    7.65    0.84
  -3  -5  -2    9.25    0.70
  -3  -5  -2    9.27    1.00
  -3  -5  -2    8.70    1.12
  -3  -5  -2    8.03    0.81
  -3  -5  -2    9.35    0.77
  -3  -5  -2   10.09    0.92
   3   5   2    9.74    0.96
   3   5   2    8.97    0.94
   3   5   2    9.46    1.24
   3   5   2    7.33    0.68
   3   5   2    7.96    0.87
   3   5   2    8.73    0.81
  -4  -5  -2    3.65    0.67
  -4  -5  -2    5.79    0.81
  -4  -5  -2    4.50    0.74
  -4  -5  -2    3.57    0.91
  -4  -5  -2    4.77    0.77
  -4  -5  -2    5.74    1.16
   4   5   2    4.58    0.94
   4   5   2    6.48    0.78
   4   5   2    3.80    0.76
   4   5   2    3.65    0.79
   4   5   2    3.14    1.12
   4   5   2    4.69    0.84
  -5  -5  -2    0.33    0.71
  -5  -5  -2   -0.18    0.84
  -5  -5  -2    0.34    0.77
  -5  -5  -2   -0.27    0.74
   5   5   2   -0.34    0.71
   5   5   2   -0.03    0.43
   5   5   2    0.83    1.22
   5   5   2   -1.09    0.71
  -6  -5  -2    3.50    1.34
  -6  -5  -2    0.54    1.01
  -6  -5  -2    3.10    1.04
   6   5   2    0.39    1.61
   6   5   2    2.30    0.30
   6   5   2    3.30    1.12
  -7  -5  -2   -1.85    1.36
  -7  -5  -2   -1.99    1.70
  -7  -5  -2    0.05    1.33
   7   5   2   -1.08    1.33
   7   5   2    4.31    1.57
   7   5   2    2.91    1.57
   7   5   2   -0.63    2.13
   7  -6  -2   -1.58    1.69
  -7   6   2   -0.54    1.42
  -7   6   2   -2.34    1.38
  -7   6   2   -2.13    1.41
   6  -6  -2    1.21    1.27
   6  -6  -2    0.62    0.86
  -6   6   2    0.66    1.11
  -6   6   2    2.28    1.07
   5  -6  -2    3.28    1.01
   5  -6  -2    2.76    0.65
   5  -6  -2    2.40    1.07
  -5   6   2    2.55    1.00
  -5   6   2    1.34    1.20
  -5   6   2    2.86    0.91
  -5   6   2    1.16    0.75
   4  -6  -2   -0.12    0.38
   4  -6  -2    0.32    0.69
   4  -6  -2   -0.71    0.61
  -4   6   2   -1.72    0.77
  -4   6   2    0.25    0.69
  -4   6   2    1.31    0.88
  -4   6   2    0.35    0.63
   3  -6  -2    7.55    0.60
   3  -6  -2    7.30    0.47
   3  -6  -2    8.07    0.64
   3  -6  -2    7.38    0.95
   3  -6  -2    7.00    0.90
  -3   6   2    8.62    0.91
  -3   6   2    8.83    1.09
  -3   6   2    6.60    0.90
  -3   6   2    8.11    0.47
  -3   6   2    7.14    0.93
  -3   6   2    8.05    0.81
   2  -6  -2  108.76    3.23
   2  -6  -2  105.75    2.94
   2  -6  -2  108.79    3.12
   2  -6  -2  111.09    2.87
   2  -6  -2  109.57    2.77
  -2   6   2  105.24    3.20
  -2   6   2  105.68    3.23
  -2   6   2  109.42    3.23
  -2   6   2  108.28    3.15
  -2   6   2  108.96    2.80
  -2   6   2  110.25    3.10
  -2   6   2  104.27    2.97
  -2   6   2  107.43    2.61
   1  -6  -2    2.16    0.57
   1  -6  -2    1.86    0.44
   1  -6  -2    1.86    0.46
   1  -6  -2    2.65    0.54
   1  -6  -2    2.07    0.41
   1  -6  -2    2.81    0.57
  -1   6   2    1.83    0.59
  -1   6   2    2.14    0.57
  -1   6   2    2.32    0.42
  -1   6   2    2.36    0.44
  -1   6   2    2.24    0.54
   0  -6  -2   28.64    1.10
   0  -6  -2   28.59    1.38
   0  -6  -2   30.08    1.29
   0  -6  -2   29.04    1.20
   0  -6  -2   26.24    1.27
   0  -6  -2   28.71    1.30
   0   6   2   30.00    1.36
   0   6   2   28.87    1.09
   0   6   2   29.73    1.24
   0   6   2   27.73    1.22
   0   6   2   30.48    1.46
  -1  -6  -2    9.45    0.96
  -1  -6  -2   11.66    0.83
  -1  -6  -2   10.31    0.79
  -1  -6  -2   10.10    0.93
  -1  -6  -2   11.42    0.68
   1   6   2   10.57    1.12
   1   6   2    9.82    0.86
   1   6   2   11.26    0.75
   1   6   2   10.85    0.86
   1   6   2   10.91    0.81
   1   6   2   10.73    0.69
  -2  -6  -2    1.52    0.72
  -2  -6  -2    1.02    0.50
  -2  -6  -2    1.50    0.45
  -2  -6  -2    1.49    0.27
  -2  -6  -2    1.57    0.58
  -2  -6  -2    1.36    0.45
   2   6   2    2.16    0.65
   2   6   2    0.60    0.74
   2   6   2    1.51    0.48
   2   6   2    1.28    0.40
   2   6   2    1.30    0.52
  -3  -6  -2    9.07    0.71
  -3  -6  -2    8.41    0.95
  -3  -6  -2    6.96    1.16
  -3  -6  -2    8.49    0.84
  -3  -6  -2    9.38    0.93
  -3  -6  -2    7.03    0.80
  -3  -6  -2    9.41    1.10
   3   6   2    8.82    1.29
   3   6   2    7.74    0.87
   3   6   2    7.30    0.79
   3   6   2    7.66    0.92
   3   6   2    9.20    1.05
  -4  -6  -2    3.21    0.68
  -4  -6  -2    3.54    0.76
  -4  -6  -2    2.04    0.77
  -4  -6  -2    3.80    0.97
  -4  -6  -2    3.61    0.78
  -4  -6  -2    2.63    0.78
   4   6   2    2.37    0.81
   4   6   2    2.43    1.21
   4   6   2    3.34    0.85
  -5  -6  -2    0.06    0.88
  -5  -6  -2    1.40    0.83
  -5  -6  -2   -0.62    0.81
  -5  -6  -2   -0.13    0.81
  -5  -6  -2    1.22    1.10
   5   6   2   -0.30    0.91
   5   6   2   -0.24    0.58
   5   6   2   -0.39    0.76
   5   6   2   -2.41    1.36
  -6  -6  -2   -0.38    1.41
  -6  -6  -2   -0.74    1.08
  -6  -6  -2   -1.87    0.93
   6   6   2    1.00    1.20
   6   6   2   -0.03    1.75
   6   6   2   -1.22    0.99
  -7  -6  -2   -3.32    1.23
  -7  -6  -2   -0.45    1.52
  -7  -6  -2    0.88    1.85
   7   6   2   -3.83    1.41
   7   6   2    1.63    2.62
   7   6   2    1.39    1.64
   7   6   2   -0.70    1.44
  -7   7   2   -1.26    1.66
  -7   7   2   -0.27    1.66
  -7   7   2   -2.74    1.41
   6  -7  -2    2.02    1.41
   6  -7  -2   -0.23    0.78
   6  -7  -2   -2.69    1.11
  -6   7   2    0.62    1.01
  -6   7   2    0.08    1.12
   5  -7  -2    1.22    1.01
   5  -7  -2   -0.21    0.51
   5  -7  -2   -0.25    1.06
  -5   7   2   -0.60    1.24
  -5   7   2    2.38    1.02
  -5   7   2    0.33    0.85
  -5   7   2   -0.21    0.80
   4  -7  -2   38.81    1.99
   4  -7  -2   45.22    2.33
  -4   7   2   40.03    2.06
  -4   7   2   44.61    2.01
  -4   7   2   35.64    2.07
   3  -7  -2    1.95    0.47
   3  -7  -2    0.91    0.71
   3  -7  -2    1.69    0.36
   3  -7  -2    1.31    0.78
   3  -7  -2    2.46    0.53
  -3   7   2    1.51    0.65
  -3   7   2    1.57    0.74
  -3   7   2    1.43    0.61
  -3   7   2    1.44    0.37
  -3   7   2    2.06    0.64
  -3   7   2    2.86    0.65
  -3   7   2    1.87    0.93
   2  -7  -2    0.43    0.52
   2  -7  -2   -0.46    0.41
   2  -7  -2    1.42    0.66
   2  -7  -2    0.18    0.50
  -2   7   2    1.36    0.70
  -2   7   2    0.19    0.22
  -2   7   2    0.58    0.59
  -2   7   2   -0.92    0.64
  -2   7   2    0.49    0.41
  -2   7   2    1.09    0.56
  -2   7   2    0.84    0.53
  -2   7   2   -0.12    0.67
   1  -7  -2   11.67    1.10
   1  -7  -2   11.71    0.83
   1  -7  -2   11.89    0.84
   1  -7  -2   11.33    0.91
   1  -7  -2   11.91    1.01
   1  -7  -2   11.67    1.02
  -1   7   2   11.70    1.02
  -1   7   2   12.25    1.02
  -1   7   2   10.52    1.08
  -1   7   2   10.84    0.83
  -1   7   2    9.96    0.79
   0  -7  -2    4.91    0.75
   0  -7  -2    4.32    0.58
   0  -7  -2    6.68    0.77
   0  -7  -2    4.97    0.78
   0  -7  -2    5.83    0.62
   0  -7  -2    5.76    0.81
   0   7   2    4.87    0.69
   0   7   2    4.57    0.66
   0   7   2    5.20    0.58
   0   7   2    4.58    0.87
   0   7   2    4.23    0.73
  -1  -7  -2    3.21    0.75
  -1  -7  -2    2.74    0.67
  -1  -7  -2    2.69    0.57
  -1  -7  -2    3.50    0.53
  -1  -7  -2    3.34    0.60
   1   7   2    2.55    0.50
   1   7   2    3.89    0.59
   1   7   2    3.09    0.61
   1   7   2    2.21    0.82
   1   7   2    3.22    0.62
   1   7   2    2.56    0.69
  -2  -7  -2    1.75    0.63
  -2  -7  -2    2.53    0.55
  -2  -7  -2    2.62    0.72
  -2  -7  -2    2.54    0.33
  -2  -7  -2    1.61    0.89
  -2  -7  -2    2.91    0.67
   2   7   2    1.99    0.62
   2   7   2    2.83    0.91
   2   7   2    3.56    0.77
   2   7   2    3.26    0.56
   2   7   2    2.51    0.61
  -3  -7  -2    3.98    1.16
  -3  -7  -2    4.33    0.81
  -3  -7  -2    4.41    0.50
  -3  -7  -2    4.43    0.78
  -3  -7  -2    4.69    1.00
  -3  -7  -2    4.21    0.78
   3   7   2    4.69    1.12
   3   7   2    4.66    0.83
   3   7   2    3.52    0.85
   3   7   2    3.44    0.71
   3   7   2    3.25    0.97
  -4  -7  -2    0.92    0.72
  -4  -7  -2   -0.40    0.75
  -4  -7  -2   -0.16    0.63
  -4  -7  -2    0.61    0.60
  -4  -7  -2   -0.58    0.90
   4   7   2    0.02    0.79
   4   7   2   -0.09    0.88
   4   7   2    2.21    1.28
  -5  -7  -2   -0.23    0.88
  -5  -7  -2    0.60    1.22
  -5  -7  -2    1.03    0.87
  -5  -7  -2    0.20    0.91
   5   7   2   -0.63    0.97
   5   7   2   -0.38    1.51
  -6  -7  -2   -1.56    1.20
  -6  -7  -2   -1.59    1.10
  -6  -7  -2   -2.24    1.09
  -6  -7  -2   -0.22    1.54
   6   7   2   -3.22    1.80
   6   7   2    2.22    1.36
  -7  -7  -2   -1.46    1.94
  -7  -7  -2    0.99    1.60
  -7  -7  -2   -0.68    1.60
  -7  -7  -2    1.11    1.83
   7   7   2   -1.91    1.74
   7   7   2   -1.28    1.77
   7   7   2    1.36    2.55
   7  -8  -2   -1.02    2.24
   6  -8  -2    0.82    1.56
   6  -8  -2    1.64    1.37
  -6   8   2    1.18    1.39
  -6   8   2    1.06    1.48
   5  -8  -2    1.66    1.12
   5  -8  -2   -0.80    1.13
  -5   8   2   -0.33    1.48
  -5   8   2    0.75    0.99
  -5   8   2   -1.24    1.05
  -5   8   2   -1.49    1.09
   4  -8  -2    0.17    0.89
   4  -8  -2   -0.61    0.87
  -4   8   2    0.72    0.90
  -4   8   2    2.07    1.18
  -4   8   2   -2.00    0.83
   3  -8  -2    0.12    0.75
   3  -8  -2    0.31    0.60
   3  -8  -2   -0.30    0.38
   3  -8  -2    0.23    0.78
  -3   8   2    0.43    0.70
  -3   8   2    0.63    0.95
  -3   8   2    0.00    0.80
  -3   8   2    1.30    0.81
  -3   8   2   -0.23    0.41
   2  -8  -2   -0.76    0.57
   2  -8  -2    0.64    0.65
   2  -8  -2    0.65    0.44
   2  -8  -2   -0.34    0.54
   2  -8  -2    0.74    0.66
  -2   8   2    0.84    0.84
  -2   8   2    0.28    0.23
  -2   8   2    0.08    0.81
  -2   8   2    0.12    0.46
  -2   8   2    0.60    0.61
  -2   8   2   -0.11    0.63
  -2   8   2    0.37    0.81
   1  -8  -2    2.45    0.72
   1  -8  -2    3.41    0.68
   1  -8  -2    2.40    0.55
   1  -8  -2    2.72    0.82
   1  -8  -2    2.21    0.57
  -1   8   2    2.62    0.66
  -1   8   2    2.77    0.87
  -1   8   2    2.33    0.74
  -1   8   2    3.12    0.94
  -1   8   2    1.91    0.55
   0  -8  -2    2.04    0.71
   0  -8  -2    2.89    0.61
   0  -8  -2    3.77    0.90
   0  -8  -2    2.36    0.42
   0  -8  -2    2.27    0.54
   0  -8  -2    1.27    0.67
   0  -8  -2    2.57    0.69
   0   8   2    1.49    0.84
   0   8   2    2.12    0.63
   0   8   2    2.10    0.77
   0   8   2    1.99    0.53
   0   8   2    2.68    0.68
  -1  -8  -2    1.85    0.63
  -1  -8  -2    2.39    0.87
  -1  -8  -2    2.85    0.73
  -1  -8  -2    1.57    0.75
  -1  -8  -2    3.06    0.57
   1   8   2    1.76    0.65
   1   8   2    2.31    0.64
   1   8   2    1.06    0.89
   1   8   2    1.77    0.60
   1   8   2    2.46    0.64
   1   8   2    2.45    0.81
  -2  -8  -2   10.71    1.25
  -2  -8  -2    8.31    1.36
  -2  -8  -2    8.63    0.88
  -2  -8  -2    8.41    1.02
  -2  -8  -2    9.76    1.04
  -2  -8  -2   10.33    0.59
   2   8   2    8.30    1.02
   2   8   2   10.62    0.97
   2   8   2    9.30    1.42
   2   8   2    9.86    1.13
   2   8   2    8.05    1.00
  -3  -8  -2    0.47    0.66
  -3  -8  -2   -0.28    0.39
  -3  -8  -2    0.06    0.63
  -3  -8  -2    0.61    0.95
   3   8   2   -0.67    0.78
   3   8   2    0.02    0.73
   3   8   2   -0.38    1.14
  -4  -8  -2    3.03    1.17
  -4  -8  -2    1.81    0.67
  -4  -8  -2    2.09    0.89
  -4  -8  -2    2.71    0.91
   4   8   2    2.29    1.38
   4   8   2    1.83    0.97
  -5  -8  -2   -0.11    1.05
  -5  -8  -2    0.88    0.90
  -5  -8  -2    0.44    0.95
  -5  -8  -2    0.61    1.36
  -5  -8  -2   -0.21    1.11
   5   8   2   -0.13    1.65
   5   8   2    0.10    1.06
  -6  -8  -2    0.01    1.34
  -6  -8  -2    1.71    1.25
  -6  -8  -2    1.17    1.93
  -6  -8  -2    1.67    1.27
   6   8   2    0.94    1.50
   6   8   2    0.65    2.07
   6  -9  -2    0.33    1.76
   6  -9  -2   -0.07    1.48
  -6   9   2   -1.47    1.64
  -6   9   2   -1.11    1.50
   5  -9  -2   -0.71    1.24
   5  -9  -2    2.70    1.33
  -5   9   2    0.40    1.16
  -5   9   2    1.17    1.10
   4  -9  -2    2.09    1.13
   4  -9  -2    2.22    1.20
  -4   9   2    2.39    1.42
  -4   9   2    1.84    1.11
  -4   9   2    2.71    1.16
   3  -9  -2    0.52    0.70
   3  -9  -2   -0.19    0.67
   3  -9  -2    0.70    0.87
   3  -9  -2   -0.29    0.47
  -3   9   2    0.38    0.87
  -3   9   2    0.36    0.55
  -3   9   2    1.87    1.09
  -3   9   2   -0.09    0.83
   2  -9  -2    9.72    1.10
   2  -9  -2   10.72    1.18
   2  -9  -2    9.95    1.18
   2  -9  -2   11.99    1.05
   2  -9  -2   10.46    1.02
  -2   9   2    9.94    1.25
  -2   9   2   10.27    1.32
  -2   9   2   11.44    1.52
  -2   9   2   10.91    1.26
  -2   9   2   11.46    1.20
  -2   9   2   10.20    0.49
  -2   9   2   11.57    1.07
   1  -9  -2    1.54    0.88
   1  -9  -2    1.21    0.57
   1  -9  -2    1.02    0.76
   1  -9  -2    2.74    0.82
   1  -9  -2    1.50    0.59
  -1   9   2    1.43    0.69
  -1   9   2    0.89    0.69
  -1   9   2    0.97    0.88
  -1   9   2    3.29    0.95
  -1   9   2    1.57    0.89
   0  -9  -2    2.68    0.70
   0  -9  -2    0.95    0.51
   0  -9  -2   -0.08    0.69
   0  -9  -2    1.49    0.45
   0  -9  -2    1.68    0.89
   0  -9  -2    1.41    0.82
   0  -9  -2    1.33    1.01
   0   9   2    1.43    0.69
   0   9   2    1.44    0.83
   0   9   2    1.33    0.67
   0   9   2    2.27    0.96
   0   9   2    2.20    0.89
  -1  -9  -2   -1.17    0.65
  -1  -9  -2    0.91    0.66
  -1  -9  -2    0.36    0.83
  -1  -9  -2    1.24    1.04
  -1  -9  -2    1.00    0.58
   1   9   2   -0.05    0.63
   1   9   2   -0.94    0.89
   1   9   2    1.33    0.73
   1   9   2   -0.92    0.75
   1   9   2    0.59    0.64
   1   9   2    0.00    0.89
  -2  -9  -2   10.84    1.14
  -2  -9  -2    6.79    1.16
  -2  -9  -2    5.20    1.53
  -2  -9  -2    9.63    0.64
  -2  -9  -2    9.71    0.97
   2   9   2   10.74    1.60
   2   9   2    8.55    1.15
   2   9   2    7.38    0.91
  -3  -9  -2    1.90    0.47
  -3  -9  -2    3.38    0.91
  -3  -9  -2    2.58    0.77
   3   9   2    3.24    1.45
   3   9   2    2.35    0.93
   3   9   2    1.98    0.99
  -4  -9  -2    0.38    0.90
  -4  -9  -2   -0.93    0.89
  -4  -9  -2    2.20    1.26
   4   9   2   -1.41    1.55
   4   9   2    0.53    1.05
  -5  -9  -2   -0.46    1.01
  -5  -9  -2   -0.67    1.06
  -5  -9  -2   -0.62    1.45
   5   9   2   -0.58    1.36
   5   9   2   -0.18    2.10
  -6  -9  -2    1.35    1.51
  -6  -9  -2    2.36    1.53
  -6  -9  -2    1.99    2.00
  -6  -9  -2    1.30    1.67
   6   9   2    4.70    2.51
   6   9   2   -1.17    1.49
   6   9   2    0.63    1.71
   6 -10  -2    2.63    1.99
   6 -10  -2    2.96    1.87
  -6  10   2   -0.27    1.81
  -6  10   2    1.72    1.87
   5 -10  -2    2.24    1.57
   5 -10  -2    2.50    1.48
  -5  10   2    1.65    1.50
  -5  10   2    8.74    1.64
   4 -10  -2    0.26    1.14
   4 -10  -2    1.38    1.15
  -4  10   2    0.20    1.19
  -4  10   2    0.67    1.30
   3 -10  -2    1.54    0.92
   3 -10  -2    1.27    0.91
   3 -10  -2    0.79    0.89
   3 -10  -2   -0.03    0.64
   3 -10  -2    0.50    1.06
  -3  10   2    1.11    1.54
  -3  10   2    1.34    1.05
  -3  10   2   -0.10    0.61
  -3  10   2    0.49    0.93
   2 -10  -2    9.87    1.31
   2 -10  -2   10.00    1.13
   2 -10  -2    8.02    1.12
   2 -10  -2   11.38    1.39
   2 -10  -2   12.44    1.22
  -2  10   2   10.57    0.37
  -2  10   2   13.67    1.69
  -2  10   2   12.24    1.68
  -2  10   2   11.42    1.22
  -2  10   2   10.68    1.31
   1 -10  -2    5.54    0.86
   1 -10  -2    5.78    1.83
   1 -10  -2    5.33    0.85
   1 -10  -2    7.45    1.11
   1 -10  -2    6.43    1.30
  -1  10   2    6.23    1.27
  -1  10   2    5.39    0.87
  -1  10   2    5.26    1.22
  -1  10   2    6.78    0.99
  -1  10   2    4.70    1.19
   0 -10  -2    4.21    0.78
   0 -10  -2    2.14    0.99
   0 -10  -2    5.75    1.25
   0 -10  -2    3.50    1.07
   0 -10  -2    2.73    0.62
   0 -10  -2    4.65    1.07
   0 -10  -2    3.25    0.88
   0  10   2    2.93    1.14
   0  10   2    3.43    0.88
   0  10   2    2.90    1.23
   0  10   2    3.10    1.03
   0  10   2    4.89    0.99
  -1 -10  -2    0.60    0.75
  -1 -10  -2    1.22    1.20
  -1 -10  -2    1.80    0.86
  -1 -10  -2    2.61    0.99
   1  10   2    1.26    0.86
   1  10   2    1.53    0.92
   1  10   2    1.73    1.29
   1  10   2    1.52    0.84
  -2 -10  -2   12.94    1.40
  -2 -10  -2   10.39    1.11
  -2 -10  -2   10.98    0.71
  -2 -10  -2   10.42    1.49
   2  10   2   11.38    1.18
   2  10   2    8.48    1.26
   2  10   2   10.99    1.73
  -3 -10  -2    5.47    1.12
  -3 -10  -2    5.46    1.39
  -3 -10  -2    5.95    0.58
  -3 -10  -2    5.83    1.05
   3  10   2    6.12    1.26
   3  10   2    8.49    1.89
  -4 -10  -2    1.00    1.45
  -4 -10  -2   -1.18    1.04
  -4 -10  -2    0.87    1.07
   4  10   2    0.40    1.82
   4  10   2   -1.25    1.19
  -5 -10  -2    2.46    1.76
  -5 -10  -2    0.32    1.22
  -5 -10  -2   -1.27    1.35
   5  10   2    2.95    1.59
   5  10   2   -0.88    2.17
  -6 -10  -2    1.51    2.14
  -6 -10  -2    0.71    1.64
   6  10   2    3.09    1.88
   6  10   2    2.94    2.75
   6  10   2   -0.07    1.86
   5 -11  -2   -0.66    1.68
   5 -11  -2   -2.37    1.50
  -5  11   2    0.19    1.49
  -5  11   2    0.50    1.69
   4 -11  -2   -0.64    1.23
   4 -11  -2    0.90    1.33
  -4  11   2    0.36    1.32
  -4  11   2    0.77    1.28
   3 -11  -2    3.41    1.02
   3 -11  -2    0.21    0.95
   3 -11  -2    0.56    1.14
   3 -11  -2   -0.35    1.27
  -3  11   2    0.58    0.78
  -3  11   2    1.68    1.48
  -3  11   2   -0.44    1.08
   2 -11  -2    5.62    1.16
   2 -11  -2    6.24    1.37
   2 -11  -2    4.96    1.07
   2 -11  -2    6.65    1.04
   2 -11  -2    7.79    1.41
  -2  11   2    6.12    1.30
  -2  11   2    7.16    1.50
  -2  11   2    5.98    1.04
   1 -11  -2    2.30    0.81
   1 -11  -2    4.17    0.95
   1 -11  -2    1.64    0.84
   1 -11  -2    3.68    1.40
   1 -11  -2    3.81    1.14
  -1  11   2    2.60    0.91
  -1  11   2    4.37    1.47
   0 -11  -2    1.62    1.52
   0 -11  -2    1.17    0.60
   0 -11  -2    1.45    0.82
   0 -11  -2   -0.11    1.01
   0 -11  -2    2.07    1.16
   0  11   2    0.62    0.87
   0  11   2    2.94    1.41
  -1 -11  -2   -0.05    0.46
  -1 -11  -2    0.17    0.82
  -1 -11  -2   -1.27    1.02
  -1 -11  -2   -0.07    0.97
  -1 -11  -2    0.50    1.05
   1  11   2    1.84    1.37
   1  11   2    1.14    0.98
   1  11   2   -0.82    0.95
  -2 -11  -2    5.24    1.18
  -2 -11  -2    4.23    1.45
  -2 -11  -2    3.71    0.47
  -2 -11  -2    3.41    0.98
   2  11   2    5.31    1.80
   2  11   2    4.57    1.24
  -3 -11  -2    8.38    1.16
  -3 -11  -2    9.16    1.36
  -3 -11  -2    3.56    1.54
   3  11   2    6.62    1.45
   3  11   2    5.59    2.20
  -4 -11  -2    2.59    1.30
  -4 -11  -2   -0.46    1.21
  -4 -11  -2    2.15    1.91
   4  11   2    0.70    2.25
   4  11   2    1.39    1.41
  -5 -11  -2    3.51    2.26
  -5 -11  -2    0.40    1.52
   5  11   2    0.97    2.69
   5  11   2   -2.88    1.57
   4 -12  -2    0.27    1.50
   4 -12  -2    1.94    1.64
  -4  12   2    4.27    1.62
  -4  12   2    0.22    1.56
   3 -12  -2    0.54    1.44
   3 -12  -2    0.79    1.28
  -3  12   2   -0.68    1.33
  -3  12   2   -0.52    1.70
   2 -12  -2    1.70    1.02
   2 -12  -2   -0.01    1.10
   2 -12  -2   -0.51    1.25
   2 -12  -2    2.25    1.38
  -2  12   2    0.12    0.98
  -2  12   2   -0.85    1.62
  -2  12   2    0.68    1.32
   1 -12  -2   -0.46    0.83
   1 -12  -2    3.84    1.31
   1 -12  -2    1.06    1.34
   1 -12  -2    4.70    1.78
  -1  12   2    0.74    0.95
  -1  12   2    3.29    1.57
  -1  12   2    1.66    0.59
   0 -12  -2    1.93    1.29
   0 -12  -2    1.63    0.76
   0 -12  -2    1.88    1.22
   0 -12  -2    3.56    1.06
   0  12   2    4.72    1.64
   0  12   2    4.66    1.19
  -1 -12  -2    1.74    0.62
  -1 -12  -2    1.04    1.02
  -1 -12  -2    2.30    1.13
  -1 -12  -2   -0.29    1.26
  -1 -12  -2    2.90    1.68
   1  12   2    0.77    1.09
   1  12   2    0.37    1.71
  -2 -12  -2    1.65    1.58
  -2 -12  -2    4.07    1.11
  -2 -12  -2    1.79    1.26
   2  12   2    6.03    2.03
   2  12   2    3.27    1.31
  -3 -12  -2   -1.63    1.16
  -3 -12  -2   -3.15    1.80
  -3 -12  -2   -0.43    1.25
   3  12   2   -2.21    2.23
   3  12   2    1.02    1.40
  -4 -12  -2    2.34    1.35
  -4 -12  -2    1.19    1.53
  -4 -12  -2   -2.14    1.91
   4  12   2    3.11    1.82
   4  12   2   -0.45    2.77
   4 -13  -2   -2.05    1.95
   4 -13  -2   -1.04    1.58
  -4  13   2   -1.83    2.13
   3 -13  -2    0.88    1.82
   3 -13  -2    0.67    1.53
  -3  13   2   -0.94    2.07
  -3  13   2   -1.50    1.53
   2 -13  -2    2.30    1.66
   2 -13  -2   -3.21    2.03
   2 -13  -2    1.02    1.19
  -2  13   2   -0.50    1.75
  -2  13   2   -0.40    1.40
  -2  13   2    0.26    1.22
   1 -13  -2    2.73    1.58
   1 -13  -2    0.66    1.40
   1 -13  -2    1.14    1.04
  -1  13   2    2.73    1.88
  -1  13   2    0.89    1.15
   0 -13  -2    0.29    1.55
   0 -13  -2   -3.50    2.39
   0  13   2    0.48    0.85
   0  13   2   -1.45    1.15
   0  13   2    3.40    1.89
  -1 -13  -2   -0.75    1.62
  -1 -13  -2   -1.20    1.01
  -1 -13  -2    2.64    1.66
   1  13   2   -1.83    2.14
   1  13   2    1.22    1.36
  -2 -13  -2    0.11    1.32
  -2 -13  -2   -0.85    1.64
  -2 -13  -2   -1.27    1.74
   2  13   2   -0.82    2.10
   2  13   2   -0.01    1.44
  -3 -13  -2   -2.31    2.03
  -3 -13  -2   -2.04    1.48
   3  13   2    0.22    2.61
   3  13   2    0.26    1.66
   2 -14  -2    2.86    1.99
  -2  14   2   -2.53    1.57
  -2  14   2    1.18    1.49
  -2  14   2    3.46    2.24
   1 -14  -2    2.61    1.87
   1 -14  -2    4.69    1.88
  -1  14   2    4.92    2.22
  -1  14   2    1.55    1.62
   0 -14  -2    5.57    1.84
   0 -14  -2    7.50    2.11
   0  14   2    3.76    1.76
   0  14   2    6.28    2.46
  -1 -14  -2   -2.94    1.91
  -1 -14  -2    0.23    1.30
  -1 -14  -2    1.76    2.12
   1  14   2   -1.79    1.67
   1  14   2   -2.16    2.20
  -2 -14  -2    0.61    2.10
  -2 -14  -2    1.64    1.54
  -2 -14  -2    2.01    2.46
  -2 -14  -2    1.69    1.73
   2  14   2   -0.22    1.80
   2  14   2   -0.45    1.50
   2  14   2    4.41    2.81
   2  14  -3    1.20    2.58
  -2 -14   3   -3.74    2.34
  -2 -14   3   -2.70    1.62
   1  14  -3    4.38    2.48
  -1 -14   3    0.09    2.37
  -1 -14   3    2.91    1.89
  -1 -14   3    3.20    1.61
   0  14  -3    3.71    2.45
   0 -14   3    2.72    1.44
   0 -14   3    0.03    1.70
   0 -14   3    2.07    1.95
  -1  14  -3   -1.78    1.61
  -1  14  -3    0.50    2.27
   1 -14   3    2.81    2.06
   1 -14   3    1.98    1.70
  -2  14  -3    2.03    1.81
  -2  14  -3   -0.10    2.35
   2 -14   3    1.66    2.30
   2 -14   3    2.60    1.66
   2 -14   3   -1.31    1.79
   4  13  -3   -2.74    2.67
   3  13  -3   -0.06    1.60
   3  13  -3    0.33    1.53
   3  13  -3   -2.41    2.37
  -3 -13   3   -1.32    1.40
  -3 -13   3    5.29    2.27
   2  13  -3   -1.27    2.19
   2  13  -3   -0.78    1.41
   2  13  -3   -0.61    1.16
  -2 -13   3    3.85    1.33
  -2 -13   3    1.43    2.02
   1  13  -3    0.84    1.01
   1  13  -3    2.19    2.02
  -1 -13   3   -1.92    1.15
  -1 -13   3   -1.23    1.39
  -1 -13   3   -2.44    1.73
   0  13  -3    1.28    1.82
   0 -13   3    1.75    1.25
   0 -13   3   -3.13    1.32
   0 -13   3   -0.57    1.65
  -1  13  -3    2.43    1.93
  -1  13  -3    1.98    1.39
   1 -13   3    0.22    1.52
   1 -13   3    2.28    1.75
  -2  13  -3    0.56    1.43
  -2  13  -3    2.48    2.05
   2 -13   3    1.09    1.94
   2 -13   3    0.32    1.55
  -3  13  -3   -4.54    1.97
  -3  13  -3    2.18    1.78
   3 -13   3    1.47    1.70
   3 -13   3    0.36    2.09
   3 -13   3   -3.51    1.72
   4  12  -3   -1.06    1.65
   4  12  -3   -0.64    1.58
   4  12  -3    3.20    2.56
  -4 -12   3    1.55    1.38
  -4 -12   3    2.94    2.07
   3  12  -3    2.61    1.44
   3  12  -3    0.11    1.12
   3  12  -3    0.33    2.11
  -3 -12   3   -2.34    1.76
  -3 -12   3   -1.04    1.34
   2  12  -3    3.80    1.93
   2  12  -3    1.34    1.10
   2  12  -3    1.93    1.23
  -2 -12   3    2.54    1.22
  -2 -12   3    1.19    1.79
   1  12  -3    3.08    0.95
   1  12  -3    3.92    1.24
   1  12  -3    3.94    1.79
   1  12  -3    3.62    1.16
  -1 -12   3    6.42    1.44
  -1 -12   3    4.86    1.67
  -1 -12   3    5.02    1.25
   0  12  -3   -0.32    1.23
   0  12  -3    1.18    1.58
   0  12  -3    1.78    0.67
   0 -12   3    0.46    1.00
   0 -12   3   -1.11    1.19
   0 -12   3   -0.02    1.39
  -1  12  -3    4.90    1.60
  -1  12  -3    4.61    1.27
   1 -12   3    5.58    1.36
   1 -12   3    5.35    1.69
  -2  12  -3    0.41    1.29
  -2  12  -3   -1.47    1.42
   2 -12   3   -0.98    1.15
   2 -12   3   -1.08    1.59
  -3  12  -3   -1.85    1.65
  -3  12  -3    3.21    1.56
   3 -12   3    0.98    1.51
   3 -12   3   -1.03    1.45
   3 -12   3   -0.72    1.74
  -4  12  -3    1.62    2.18
  -4  12  -3    1.61    1.69
   4 -12   3    2.15    1.89
   4 -12   3   -2.05    1.51
   5  11  -3    0.26    1.68
   5  11  -3   -0.59    2.32
   5  11  -3   -0.21    1.59
  -5 -11   3    3.45    1.54
  -5 -11   3    1.24    1.96
   4  11  -3   -0.66    2.13
   4  11  -3   -0.62    1.33
   4  11  -3    1.79    1.26
  -4 -11   3    1.29    1.83
  -4 -11   3   -2.65    1.14
   3  11  -3    0.36    1.02
   3  11  -3    3.19    1.81
   3  11  -3    1.01    1.27
  -3 -11   3   -0.05    1.50
  -3 -11   3    0.55    1.02
  -3 -11   3    3.14    1.15
   2  11  -3    1.93    1.64
   2  11  -3    0.08    1.01
   2  11  -3    0.95    0.92
  -2 -11   3    0.98    1.37
  -2 -11   3    0.42    0.89
   1  11  -3    2.43    1.44
   1  11  -3    0.97    0.72
   1  11  -3    1.29    1.01
   1  11  -3    0.20    0.88
  -1 -11   3    0.99    1.29
  -1 -11   3    0.68    0.84
   0  11  -3    0.68    1.38
   0  11  -3    1.63    1.00
   0  11  -3    1.00    0.57
   0 -11   3    0.81    1.24
   0 -11   3    1.72    0.85
   0 -11   3    0.35    0.93
  -1  11  -3    6.85    1.42
  -1  11  -3    8.34    1.29
  -1  11  -3   11.26    1.72
   1 -11   3    9.84    1.40
   1 -11   3   10.35    1.57
   1 -11   3    7.09    1.44
  -2  11  -3    3.24    1.12
  -2  11  -3    3.82    1.49
   2 -11   3    4.50    1.54
   2 -11   3    1.67    1.07
   2 -11   3   -0.14    0.91
  -3  11  -3   -2.98    1.25
  -3  11  -3    0.15    1.23
   3 -11   3   -1.32    1.51
   3 -11   3    0.31    1.32
   3 -11   3    1.22    1.24
  -4  11  -3    4.11    1.70
  -4  11  -3    0.92    1.38
   4 -11   3    1.47    1.61
   4 -11   3    2.28    1.65
   4 -11   3   -0.49    1.26
  -5  11  -3    1.16    1.81
  -5  11  -3    1.74    1.79
   5 -11   3    1.14    1.91
   5 -11   3   -0.20    1.58
   6  10  -3    0.25    1.94
   6  10  -3    0.98    2.44
  -6 -10   3    0.29    2.05
  -6 -10   3   -1.26    1.52
   5  10  -3    2.58    2.08
   5  10  -3    1.58    1.46
   5  10  -3   -0.46    1.39
  -5 -10   3    4.52    1.66
  -5 -10   3   -1.73    1.22
   4  10  -3    1.18    1.29
   4  10  -3    2.09    1.17
   4  10  -3    3.28    1.89
  -4 -10   3    2.45    1.54
  -4 -10   3   -0.18    1.26
  -4 -10   3    0.89    1.06
   3  10  -3    2.83    1.65
   3  10  -3    6.05    1.26
   3  10  -3    5.13    1.14
  -3 -10   3    3.35    0.95
  -3 -10   3    5.43    1.04
  -3 -10   3    5.71    1.47
   2  10  -3    0.73    0.87
   2  10  -3   -1.50    1.23
   2  10  -3   -0.61    0.72
  -2 -10   3    0.43    1.11
  -2 -10   3   -0.29    0.75
   1  10  -3    4.21    0.98
   1  10  -3    1.92    0.74
   1  10  -3    4.95    1.53
   1  10  -3    3.33    0.98
   1  10  -3    1.86    0.68
  -1 -10   3    3.04    1.15
  -1 -10   3    3.58    0.90
   0  10  -3   17.61    1.43
   0  10  -3   16.85    1.04
   0 -10   3   13.75    1.50
   0 -10   3   19.19    1.42
   0 -10   3   15.49    1.62
   0 -10   3   19.10    1.53
  -1  10  -3   -0.67    0.74
  -1  10  -3    1.64    1.13
   1 -10   3    0.18    0.73
   1 -10   3   -0.85    0.98
   1 -10   3   -0.09    0.71
  -2  10  -3   -0.63    1.70
  -2  10  -3   -0.32    1.01
   2 -10   3    1.28    1.17
   2 -10   3    0.18    0.75
   2 -10   3    0.43    0.85
  -3  10  -3    0.68    1.17
  -3  10  -3   -1.63    1.16
   3 -10   3   -0.90    1.12
   3 -10   3    0.67    0.72
   3 -10   3   -0.48    0.96
   3 -10   3    1.46    1.09
  -4  10  -3    1.90    1.34
  -4  10  -3    0.28    1.20
   4 -10   3   -0.06    1.13
   4 -10   3    2.81    1.51
   4 -10   3    0.90    1.29
  -5  10  -3   -0.69    1.59
  -5  10  -3   -0.88    1.61
   5 -10   3    0.34    1.68
   5 -10   3   -0.50    1.33
   5 -10   3    1.07    1.81
   6   9  -3    0.97    1.54
   6   9  -3    2.95    2.25
   6   9  -3   -1.60    1.45
  -6  -9   3    3.48    1.96
  -6  -9   3    0.65    1.51
   5   9  -3    0.54    1.34
   5   9  -3   -0.64    1.26
   5   9  -3    1.77    1.77
  -5  -9   3    0.46    1.54
  -5  -9   3   -0.65    1.14
   4   9  -3    2.55    1.15
   4   9  -3    1.88    1.50
   4   9  -3    1.80    1.06
  -4  -9   3    1.64    0.65
  -4  -9   3    1.22    1.15
  -4  -9   3    0.79    0.96
  -4  -9   3    2.72    1.26
   3   9  -3    9.57    1.13
   3   9  -3   14.81    3.25
   3   9  -3   10.26    1.31
   3   9  -3    8.89    1.16
  -3  -9   3    8.66    1.47
  -3  -9   3   11.47    1.36
  -3  -9   3    9.75    1.38
   2   9  -3   -0.12    0.64
   2   9  -3    1.73    0.85
   2   9  -3    0.05    0.76
   2   9  -3    1.57    0.90
  -2  -9   3    0.15    0.64
  -2  -9   3   -0.02    0.95
   1   9  -3    0.03    0.69
   1   9  -3   -0.39    0.65
   1   9  -3   -0.54    0.94
   1   9  -3   -0.46    0.68
   1   9  -3    0.56    0.58
   1   9  -3   -0.62    0.54
  -1  -9   3   -1.75    1.15
  -1  -9   3    0.61    0.74
  -1  -9   3   -0.81    0.84
  -1  -9   3    0.32    0.60
   0   9  -3    4.21    1.06
   0   9  -3    6.65    0.94
   0   9  -3    5.83    0.60
   0   9  -3    5.15    0.87
   0   9  -3    6.08    0.90
   0   9  -3    5.40    1.16
   0  -9   3    6.79    1.34
   0  -9   3    6.86    0.89
   0  -9   3    5.73    0.90
   0  -9   3    6.84    1.01
   0  -9   3    4.92    1.02
  -1   9  -3    5.17    0.90
  -1   9  -3    5.79    1.06
  -1   9  -3    3.74    1.13
  -1   9  -3    6.08    1.13
   1  -9   3    4.78    1.22
   1  -9   3    5.09    0.85
   1  -9   3    4.45    0.77
   1  -9   3    4.38    0.87
   1  -9   3    5.49    1.09
  -2   9  -3    5.40    0.99
  -2   9  -3    5.60    1.21
  -2   9  -3    6.21    1.10
   2  -9   3    6.64    1.28
   2  -9   3    6.82    1.43
   2  -9   3    5.44    1.00
   2  -9   3    5.73    0.80
  -3   9  -3    0.79    1.15
  -3   9  -3    0.35    1.25
   3  -9   3    0.82    1.37
   3  -9   3    1.14    1.13
   3  -9   3    0.24    0.60
   3  -9   3    2.95    0.90
  -4   9  -3   -0.37    1.02
  -4   9  -3   -0.42    1.12
   4  -9   3    0.64    1.62
   4  -9   3    2.65    1.41
   4  -9   3   -0.11    0.44
   4  -9   3    1.72    1.13
   4  -9   3   -0.28    1.05
  -5   9  -3    1.64    1.45
  -5   9  -3    2.87    1.51
   5  -9   3    1.92    1.58
   5  -9   3    2.03    1.33
   5  -9   3    1.42    1.57
  -6   9  -3   -1.51    1.60
  -6   9  -3    0.05    1.50
   6  -9   3    0.58    1.57
   6  -9   3    3.16    2.01
   6   8  -3    1.88    1.60
   6   8  -3    1.51    2.15
   6   8  -3    0.40    1.28
  -6  -8   3    3.18    1.40
  -6  -8   3    1.72    1.74
  -6  -8   3    2.95    1.43
   5   8  -3    0.87    1.08
   5   8  -3    2.53    1.23
   5   8  -3    1.77    1.74
  -5  -8   3    1.27    1.02
  -5  -8   3    0.86    1.09
  -5  -8   3    1.83    0.67
  -5  -8   3    3.87    1.48
   4   8  -3    1.63    1.27
   4   8  -3    0.24    1.05
   4   8  -3    1.04    0.87
  -4  -8   3    1.25    0.54
  -4  -8   3    0.50    0.78
  -4  -8   3    0.37    1.03
  -4  -8   3   -0.80    0.90
   3   8  -3    3.59    0.83
   3   8  -3    1.97    1.17
   3   8  -3    1.75    0.76
   3   8  -3    3.52    0.88
  -3  -8   3    1.69    0.67
  -3  -8   3    1.62    0.76
  -3  -8   3    3.41    1.00
   2   8  -3    2.94    0.77
   2   8  -3    2.09    0.86
   2   8  -3    2.27    0.71
   2   8  -3    3.06    0.75
   2   8  -3    2.36    0.74
   2   8  -3    1.50    0.97
  -2  -8   3    1.28    0.73
  -2  -8   3    1.39    1.09
  -2  -8   3    1.71    0.64
  -2  -8   3    2.57    0.89
   1   8  -3    0.71    0.56
   1   8  -3   -0.13    0.55
   1   8  -3   -0.06    0.56
   1   8  -3   -0.06    0.46
   1   8  -3   -0.18    0.42
   1   8  -3   -0.40    0.62
   1   8  -3    0.76    0.86
  -1  -8   3    0.85    0.61
  -1  -8   3    0.94    0.87
  -1  -8   3   -0.18    0.51
  -1  -8   3   -0.51    0.69
   0   8  -3    0.69    0.54
   0   8  -3    0.86    0.54
   0   8  -3    0.70    0.86
   0   8  -3    1.59    0.40
   0   8  -3    1.09    0.84
   0   8  -3    1.38    0.54
   0  -8   3    1.92    0.82
   0  -8   3    2.43    0.60
   0  -8   3    2.50    0.69
   0  -8   3    0.12    0.83
   0  -8   3    1.01    0.55
  -1   8  -3    0.93    0.66
  -1   8  -3    0.49    0.56
  -1   8  -3    0.97    0.59
  -1   8  -3    1.15    0.77
  -1   8  -3    1.76    0.89
   1  -8   3    0.90    0.88
   1  -8   3    1.79    0.61
   1  -8   3    2.71    0.82
   1  -8   3    1.08    0.61
   1  -8   3    1.70    0.55
  -2   8  -3    0.79    1.01
  -2   8  -3   -0.34    0.60
  -2   8  -3   -0.02    0.80
  -2   8  -3   -0.07    0.75
  -2   8  -3    0.59    0.64
   2  -8   3    0.94    0.80
   2  -8   3   -0.19    0.46
   2  -8   3    0.52    0.66
   2  -8   3   -0.02    0.88
  -3   8  -3    0.96    0.85
  -3   8  -3    0.62    0.91
  -3   8  -3    0.85    0.74
  -3   8  -3   -1.52    1.02
   3  -8   3   -0.01    0.81
   3  -8   3    0.42    0.48
   3  -8   3    1.33    0.85
   3  -8   3   -0.25    1.14
  -4   8  -3   -0.13    0.86
  -4   8  -3    1.22    1.05
   4  -8   3    1.84    0.34
   4  -8   3    2.64    0.98
   4  -8   3    1.44    0.38
   4  -8   3    2.76    1.14
   4  -8   3    1.92    1.18
   4  -8   3    0.34    1.33
  -5   8  -3    0.48    1.22
  -5   8  -3   -0.80    1.17
   5  -8   3   -1.52    1.55
   5  -8   3    1.19    1.41
   5  -8   3    1.30    1.20
   5  -8   3   -0.53    1.27
  -6   8  -3    0.06    1.53
  -6   8  -3   -1.85    1.29
   6  -8   3   -0.02    1.78
   6  -8   3   -0.32    1.71
   6  -8   3   -0.96    1.41
   7   7  -3    3.55    2.32
   7   7  -3    1.84    1.85
  -7  -7   3    2.41    2.07
  -7  -7   3    0.02    1.48
  -7  -7   3   -1.41    1.61
   6   7  -3   -0.03    1.18
   6   7  -3    0.12    0.88
   6   7  -3    0.65    1.84
   6   7  -3    1.77    1.38
  -6  -7   3   -1.28    1.11
  -6  -7   3    0.46    1.19
  -6  -7   3    1.23    0.87
  -6  -7   3    0.61    1.51
   5   7  -3   -0.81    0.98
   5   7  -3    0.20    1.53
   5   7  -3    1.83    1.01
  -5  -7   3    0.42    1.21
  -5  -7   3    0.86    0.57
  -5  -7   3    0.14    0.91
  -5  -7   3    0.11    1.10
  -5  -7   3   -0.71    0.93
   4   7  -3    1.13    0.82
   4   7  -3    1.00    0.85
   4   7  -3    1.08    1.09
   4   7  -3   -0.07    0.81
  -4  -7   3    1.25    0.45
  -4  -7   3    0.01    0.96
  -4  -7   3    0.10    0.71
  -4  -7   3    0.32    0.71
  -4  -7   3    0.55    0.85
   3   7  -3  107.49    3.44
   3   7  -3  106.72    3.17
   3   7  -3  105.70    3.72
   3   7  -3  102.77    3.28
   3   7  -3  104.97    3.45
   3   7  -3  108.02    3.38
  -3  -7   3  106.75    3.57
  -3  -7   3  106.89    3.25
  -3  -7   3  102.22    3.81
  -3  -7   3  103.88    2.63
  -3  -7   3  105.87    3.40
  -3  -7   3  108.99    3.33
   2   7  -3    0.49    0.46
   2   7  -3   -0.08    0.60
   2   7  -3    0.41    0.44
   2   7  -3    0.68    0.81
   2   7  -3    0.87    0.56
   2   7  -3    0.12    0.52
  -2  -7   3    1.54    0.88
  -2  -7   3    0.02    0.57
  -2  -7   3    0.67    0.52
  -2  -7   3    0.43    0.68
   1   7  -3    3.11    0.47
   1   7  -3    2.34    0.70
   1   7  -3    3.20    0.68
   1   7  -3    4.13    0.90
   1   7  -3    2.59    0.54
   1   7  -3    3.15    0.57
   1   7  -3    3.44    0.57
  -1  -7   3    3.54    0.57
  -1  -7   3    2.51    0.80
  -1  -7   3    3.75    0.77
  -1  -7   3    2.68    0.60
   0   7  -3    1.19    0.49
   0   7  -3    2.43    0.66
   0   7  -3    3.10    0.77
   0   7  -3    2.66    0.56
   0   7  -3    2.03    0.37
   0  -7   3    1.76    0.72
   0  -7   3    2.24    0.75
   0  -7   3    2.15    0.53
   0  -7   3    1.97    0.50
  -1   7  -3   14.47    1.23
  -1   7  -3   11.31    0.93
  -1   7  -3   12.32    0.99
  -1   7  -3   14.46    1.25
  -1   7  -3   12.77    0.98
   1  -7   3   15.75    1.24
   1  -7   3   13.55    0.94
   1  -7   3   14.30    1.27
   1  -7   3   12.36    0.96
   1  -7   3   13.52    1.00
  -2   7  -3    1.88    0.72
  -2   7  -3    3.18    0.90
  -2   7  -3    1.93    0.64
  -2   7  -3    2.32    0.63
   2  -7   3    2.81    0.49
   2  -7   3    2.47    0.93
   2  -7   3    2.04    0.82
   2  -7   3    1.62    0.62
  -3   7  -3   -0.33    0.69
  -3   7  -3    0.95    0.95
  -3   7  -3    0.87    0.65
  -3   7  -3   -0.35    0.65
  -3   7  -3    1.03    0.78
   3  -7   3   -0.13    0.65
   3  -7   3    0.32    0.37
   3  -7   3   -0.52    0.75
   3  -7   3    1.56    0.98
  -4   7  -3    5.00    1.01
  -4   7  -3    3.62    0.94
  -4   7  -3    3.85    1.00
   4  -7   3    5.33    1.31
   4  -7   3    3.23    1.01
   4  -7   3    3.75    0.40
   4  -7   3    3.49    1.26
   4  -7   3    3.52    1.16
   4  -7   3    5.48    0.44
  -5   7  -3   -0.78    0.93
  -5   7  -3   -0.69    1.01
   5  -7   3   -0.33    1.27
   5  -7   3   -0.28    1.20
   5  -7   3   -0.25    0.34
   5  -7   3    1.37    1.12
   5  -7   3   -3.43    1.37
  -6   7  -3   -0.79    1.30
  -6   7  -3   -0.99    1.25
   6  -7   3   -1.59    1.56
   6  -7   3    1.94    1.73
  -7   7  -3   -1.39    1.87
  -7   7  -3   -1.88    1.79
   7  -7   3    3.32    2.38
   7   6  -3    0.37    1.74
   7   6  -3   -2.54    2.08
  -7  -6   3   -2.05    1.33
  -7  -6   3    1.18    1.37
  -7  -6   3    0.99    1.95
   6   6  -3    1.10    1.50
   6   6  -3    1.10    1.02
   6   6  -3    0.76    0.72
  -6  -6   3    3.71    1.34
  -6  -6   3    1.70    1.03
  -6  -6   3    1.81    1.07
   5   6  -3    9.33    1.19
   5   6  -3   11.15    1.56
   5   6  -3    9.97    1.32
  -5  -6   3    8.74    1.34
  -5  -6   3    8.92    1.38
  -5  -6   3    8.74    1.14
  -5  -6   3    8.50    1.14
  -5  -6   3    8.67    0.83
   4   6  -3    6.27    1.21
   4   6  -3    6.78    0.99
   4   6  -3    6.37    0.99
   4   6  -3    6.67    0.92
   4   6  -3    6.45    1.16
  -4  -6   3    6.69    0.93
  -4  -6   3    7.23    0.98
  -4  -6   3    6.34    0.66
  -4  -6   3    5.83    0.97
  -4  -6   3    7.69    1.19
  -4  -6   3    5.67    1.37
  -4  -6   3    8.70    1.02
   3   6  -3    8.45    0.95
   3   6  -3    9.97    0.93
   3   6  -3    9.31    1.02
   3   6  -3   10.74    0.99
   3   6  -3    9.92    1.23
   3   6  -3   10.10    1.09
  -3  -6   3   11.10    1.03
  -3  -6   3   10.25    0.55
  -3  -6   3   11.19    1.02
  -3  -6   3   11.59    1.09
  -3  -6   3    9.32    1.06
  -3  -6   3   10.28    1.25
  -3  -6   3   10.73    1.01
   2   6  -3    1.69    0.58
   2   6  -3    3.14    0.56
   2   6  -3    1.70    0.43
   2   6  -3    2.66    0.77
   2   6  -3    2.22    0.57
   2   6  -3    1.70    0.58
  -2  -6   3    1.25    0.63
  -2  -6   3    2.07    0.29
  -2  -6   3    2.02    0.53
  -2  -6   3    2.02    0.52
  -2  -6   3    1.32    0.51
  -2  -6   3    1.69    0.79
   1   6  -3    3.19    0.70
   1   6  -3    3.27    0.66
   1   6  -3    3.08    0.37
   1   6  -3    3.61    0.54
   1   6  -3    3.21    0.57
   1   6  -3    2.98    0.47
   1   6  -3    3.32    0.53
  -1  -6   3    3.26    0.78
  -1  -6   3    2.33    0.66
  -1  -6   3    2.44    0.52
  -1  -6   3    3.01    0.53
   0   6  -3    4.18    0.54
   0   6  -3    3.61    0.50
   0   6  -3    3.67    0.40
   0   6  -3    4.23    0.68
   0   6  -3    3.03    0.69
   0  -6   3    3.30    0.51
   0  -6   3    4.57    0.76
   0  -6   3    4.76    0.59
   0  -6   3    2.86    0.64
  -1   6  -3    3.33    0.50
  -1   6  -3    2.74    0.54
  -1   6  -3    2.24    0.65
  -1   6  -3    1.81    0.65
   1  -6   3    2.67    0.49
   1  -6   3    1.85    0.44
   1  -6   3    2.20    0.45
   1  -6   3    2.71    0.63
   1  -6   3    3.66    0.68
  -2   6  -3   48.80    1.75
  -2   6  -3   45.13    1.76
  -2   6  -3   46.32    1.91
  -2   6  -3   44.12    1.79
  -2   6  -3   48.82    2.00
   2  -6   3   44.58    1.92
   2  -6   3   45.25    1.91
   2  -6   3   46.28    1.79
   2  -6   3   45.01    1.51
  -3   6  -3    2.17    0.68
  -3   6  -3    2.22    0.84
  -3   6  -3    2.92    0.70
  -3   6  -3    4.05    0.68
  -3   6  -3    2.27    0.67
   3  -6   3    2.88    0.94
   3  -6   3    1.59    0.58
   3  -6   3    2.55    0.36
   3  -6   3    2.72    0.79
  -4   6  -3   11.74    1.53
  -4   6  -3   11.13    1.26
  -4   6  -3   11.24    1.27
  -4   6  -3   10.32    1.19
   4  -6   3    9.06    0.40
   4  -6   3   11.15    1.26
   4  -6   3   13.24    1.50
   4  -6   3    8.96    1.05
   4  -6   3   10.94    0.62
   4  -6   3    9.90    0.43
   4  -6   3    9.01    1.31
  -5   6  -3    2.12    0.94
  -5   6  -3    1.16    0.89
   5  -6   3    3.03    1.31
   5  -6   3    2.27    0.59
   5  -6   3   -0.04    1.13
   5  -6   3    2.02    0.93
   5  -6   3    1.92    1.22
  -6   6  -3   -1.52    1.16
   6  -6   3   -1.24    0.79
   6  -6   3   -3.66    1.65
   6  -6   3    0.84    1.40
   6  -6   3   -0.41    1.47
  -7   6  -3    4.34    1.74
  -7   6  -3    5.23    1.62
   7  -6   3    2.75    2.02
   7   5  -3   -2.38    1.49
   7   5  -3    0.16    1.52
   7   5  -3    1.37    1.86
  -7  -5   3    0.71    1.26
  -7  -5   3   -0.47    1.31
  -7  -5   3   -0.51    1.51
   6   5  -3   -1.94    1.03
   6   5  -3    0.37    0.59
   6   5  -3   -0.58    1.39
  -6  -5   3   -1.47    0.89
  -6  -5   3    0.22    1.02
  -6  -5   3    1.31    1.15
   5   5  -3    0.14    1.18
   5   5  -3    0.18    0.52
   5   5  -3   -0.89    0.87
   5   5  -3   -0.20    0.81
   5   5  -3   -0.49    0.82
   5   5  -3   -1.06    0.95
  -5  -5   3   -2.18    0.75
  -5  -5   3    0.55    0.88
  -5  -5   3    0.97    0.84
  -5  -5   3    0.78    1.00
  -5  -5   3    0.00    0.73
   4   5  -3    1.49    0.67
   4   5  -3    1.06    0.75
   4   5  -3    2.12    0.71
   4   5  -3    1.53    0.62
   4   5  -3    1.92    0.67
   4   5  -3    3.35    0.96
  -4  -5   3    2.52    1.19
  -4  -5   3    1.02    0.58
  -4  -5   3    2.65    0.68
  -4  -5   3    3.04    0.70
  -4  -5   3    1.49    0.79
  -4  -5   3    2.45    0.70
   3   5  -3   -0.26    0.46
   3   5  -3    0.55    0.54
   3   5  -3    0.82    0.53
   3   5  -3    1.10    0.74
   3   5  -3   -0.15    0.43
   3   5  -3   -0.42    0.48
  -3  -5   3    0.66    0.75
  -3  -5   3    0.11    0.22
  -3  -5   3   -0.01    0.56
  -3  -5   3   -0.41    0.48
  -3  -5   3   -0.13    0.51
  -3  -5   3    0.01    0.40
  -3  -5   3   -0.19    0.40
   2   5  -3    2.18    0.52
   2   5  -3    2.29    0.52
   2   5  -3    2.12    0.47
   2   5  -3    2.84    0.46
   2   5  -3    2.03    0.50
   2   5  -3    2.13    0.67
  -2  -5   3    2.54    0.48
  -2  -5   3    2.61    0.52
  -2  -5   3    2.37    0.63
  -2  -5   3    2.09    0.46
  -2  -5   3    2.34    0.23
  -2  -5   3    2.32    0.56
   1   5  -3   -0.14    0.19
   1   5  -3   -0.38    0.44
   1   5  -3    0.36    0.35
   1   5  -3    0.02    0.35
   1   5  -3   -0.11    0.26
   1   5  -3    0.42    0.35
   1   5  -3    0.33    0.27
  -1  -5   3    0.09    0.25
  -1  -5   3   -0.18    0.27
  -1  -5   3   -0.30    0.46
  -1  -5   3   -0.08    0.31
   0   5  -3    1.04    0.36
   0   5  -3    1.37    0.26
   0   5  -3    1.11    0.54
   0   5  -3    1.02    0.51
   0   5  -3    0.67    0.29
   0  -5   3    1.14    0.42
   0  -5   3    1.05    0.37
   0  -5   3    0.84    0.51
   0  -5   3    1.17    0.32
  -1   5  -3    5.49    0.66
  -1   5  -3    7.31    0.82
  -1   5  -3    6.90    0.68
  -1   5  -3    6.15    0.62
   1  -5   3    7.25    0.62
   1  -5   3    6.78    0.55
   1  -5   3    5.88    0.72
   1  -5   3    5.76    0.58
   1  -5   3    6.40    0.71
  -2   5  -3   12.24    0.91
  -2   5  -3   12.22    0.99
  -2   5  -3   13.48    0.89
  -2   5  -3   13.09    0.98
  -2   5  -3   13.44    0.87
   2  -5   3   13.38    0.86
   2  -5   3   12.41    0.37
   2  -5   3   11.73    0.99
   2  -5   3   13.13    0.68
   2  -5   3   13.17    1.04
  -3   5  -3   10.82    0.92
  -3   5  -3   12.53    1.25
  -3   5  -3   11.42    1.02
  -3   5  -3   12.15    1.08
  -3   5  -3   10.71    1.00
   3  -5   3   11.64    0.53
   3  -5   3   12.91    0.96
   3  -5   3   11.93    0.62
   3  -5   3   12.81    1.01
   3  -5   3   12.35    1.24
   3  -5   3   12.71    1.15
  -4   5  -3   -0.09    0.96
  -4   5  -3    0.77    0.64
  -4   5  -3    0.44    0.69
  -4   5  -3    1.23    0.63
   4  -5   3    1.23    0.61
   4  -5   3    1.29    0.80
   4  -5   3    0.15    0.87
   4  -5   3    0.82    0.17
   4  -5   3    0.43    0.14
   4  -5   3   -0.36    0.74
   4  -5   3   -0.10    0.71
   4  -5   3    0.50    0.39
  -5   5  -3    0.16    0.80
  -5   5  -3    0.98    0.82
   5  -5   3    0.78    1.07
   5  -5   3    2.12    1.05
   5  -5   3    0.65    1.06
   5  -5   3    1.49    0.63
  -6   5  -3   -1.84    0.97
  -6   5  -3    0.36    1.12
   6  -5   3   -1.96    1.39
   6  -5   3   -0.92    1.45
   6  -5   3    1.58    1.33
   6  -5   3    0.24    0.84
  -7   5  -3    0.73    1.70
  -7   5  -3    0.10    1.41
   7  -5   3    1.62    1.96
   7  -5   3    1.25    1.83
   7  -5   3   -1.38    1.21
   7   4  -3   -1.08    1.39
   7   4  -3   -1.16    1.67
   7   4  -3   -3.87    1.38
  -7  -4   3   -2.01    1.30
  -7  -4   3    0.98    1.36
  -7  -4   3   -0.43    1.49
   6   4  -3    0.58    1.00
   6   4  -3    0.82    0.53
   6   4  -3    0.11    1.14
   6   4  -3    0.54    1.26
   6   4  -3   -1.63    0.99
  -6  -4   3    2.34    0.97
  -6  -4   3   -0.61    0.87
  -6  -4   3    2.03    1.17
  -6  -4   3    1.02    1.03
   5   4  -3    0.75    0.45
   5   4  -3    0.25    0.88
   5   4  -3   -0.75    0.73
   5   4  -3    0.10    0.92
   5   4  -3   -0.12    0.64
   5   4  -3   -0.89    0.71
   5   4  -3    0.28    0.80
  -5  -4   3   -1.15    0.67
  -5  -4   3   -0.39    0.92
  -5  -4   3   -0.95    0.74
  -5  -4   3    1.25    1.30
  -5  -4   3    0.03    0.69
  -5  -4   3    1.52    0.74
   4   4  -3    1.63    0.60
   4   4  -3    2.64    0.71
   4   4  -3    2.18    0.63
   4   4  -3    2.04    0.88
   4   4  -3    1.66    0.64
   4   4  -3    2.20    0.65
   4   4  -3    1.76    0.66
  -4  -4   3    2.02    0.71
  -4  -4   3    0.88    0.54
  -4  -4   3    1.21    0.69
  -4  -4   3    2.14    0.57
  -4  -4   3    0.99    0.86
  -4  -4   3    1.96    0.62
   3   4  -3   48.52    1.79
   3   4  -3   55.43    1.93
   3   4  -3   49.99    1.96
   3   4  -3   48.27    1.89
   3   4  -3   52.46    1.74
   3   4  -3   50.06    1.77
  -3  -4   3   49.55    1.90
  -3  -4   3   48.75    1.79
  -3  -4   3   51.90    2.12
  -3  -4   3   51.84    1.84
  -3  -4   3   50.00    1.86
  -3  -4   3   51.62    1.76
   2   4  -3   38.07    1.27
   2   4  -3   35.91    1.53
   2   4  -3   34.41    1.40
   2   4  -3   34.60    1.43
   2   4  -3   38.64    1.38
   2   4  -3   38.39    1.39
  -2  -4   3   40.40    1.47
  -2  -4   3   36.66    1.42
  -2  -4   3   37.05    1.26
  -2  -4   3   36.63    0.93
  -2  -4   3   38.55    1.38
  -2  -4   3   35.51    1.46
  -2  -4   3   39.89    1.64
   1   4  -3   71.31    2.10
   1   4  -3   70.51    2.00
   1   4  -3   70.28    2.19
   1   4  -3   67.42    2.07
   1   4  -3   66.64    1.95
   1   4  -3   70.43    1.87
   1   4  -3   66.52    1.63
  -1  -4   3   68.97    2.22
  -1  -4   3   70.07    2.07
  -1  -4   3   68.14    2.15
  -1  -4   3   68.88    2.00
   0   4  -3    3.94    0.56
   0   4  -3    2.54    0.29
   0  -4   3    3.03    0.38
   0  -4   3    3.05    0.40
   0  -4   3    3.01    0.33
   0  -4   3    2.85    0.52
  -1   4  -3    6.58    0.68
  -1   4  -3    6.45    0.68
  -1   4  -3    6.63    0.59
  -1   4  -3    6.56    0.55
   1  -4   3    7.27    0.70
   1  -4   3    6.51    0.48
   1  -4   3    6.65    0.33
   1  -4   3    7.62    0.58
   1  -4   3    7.45    0.56
   1  -4   3    5.96    0.67
  -2   4  -3   64.40    2.14
  -2   4  -3   62.36    2.05
  -2   4  -3   59.80    1.90
  -2   4  -3   63.90    1.93
  -2   4  -3   63.19    2.00
   2  -4   3   63.26    2.14
   2  -4   3   61.30    1.90
   2  -4   3   63.43    1.99
   2  -4   3   61.98    2.10
   2  -4   3   63.54    1.72
  -3   4  -3   27.36    1.33
  -3   4  -3   25.79    1.24
  -3   4  -3   24.37    1.29
  -3   4  -3   26.68    1.47
   3  -4   3   27.06    1.31
   3  -4   3   25.20    1.20
   3  -4   3   26.47    1.34
   3  -4   3   26.71    1.46
   3  -4   3   25.53    0.85
  -4   4  -3    2.12    0.71
  -4   4  -3    1.83    0.66
  -4   4  -3    1.88    0.68
  -4   4  -3    2.64    0.95
   4  -4   3    2.55    0.25
   4  -4   3    2.80    0.79
   4  -4   3    2.84    0.72
   4  -4   3    2.07    0.22
   4  -4   3    3.68    0.77
   4  -4   3    2.57    0.73
   4  -4   3    3.43    0.88
  -5   4  -3    3.36    0.87
  -5   4  -3    4.92    1.13
  -5   4  -3    5.78    1.50
  -5   4  -3    3.06    1.00
   5  -4   3    2.33    1.27
   5  -4   3    4.90    1.11
   5  -4   3    3.51    1.13
   5  -4   3    2.71    0.67
  -6   4  -3    0.10    1.10
  -6   4  -3    0.62    0.35
  -6   4  -3    1.14    1.01
  -6   4  -3    0.43    0.32
   6  -4   3   -0.40    1.33
   6  -4   3    2.77    1.35
   6  -4   3    0.75    1.37
   6  -4   3   -0.37    0.86
  -7   4  -3    2.01    1.33
  -7   4  -3    3.23    1.66
  -7   4  -3    4.20    1.47
   7  -4   3    3.64    1.84
   7  -4   3    4.36    1.90
   7  -4   3    2.13    1.29
   8   3  -3   -2.81    1.82
   8   3  -3   -1.33    1.81
  -8  -3   3   -1.22    1.66
  -8  -3   3   -2.34    1.88
  -8  -3   3   -3.47    1.57
   7   3  -3   -0.91    1.44
   7   3  -3   -1.36    1.25
   7   3  -3    1.70    1.35
  -7  -3   3    1.62    1.22
  -7  -3   3    0.99    1.16
  -7  -3   3   -0.80    1.45
   6   3  -3    2.51    1.16
   6   3  -3    2.26    0.30
   6   3  -3    1.48    0.84
   6   3  -3    0.98    0.99
   6   3  -3    5.12    1.10
  -6  -3   3    2.97    1.00
  -6  -3   3    2.54    0.98
   5   3  -3   -0.04    0.90
   5   3  -3    1.36    0.79
   5   3  -3    0.54    0.76
   5   3  -3    1.60    0.72
   5   3  -3   -0.76    0.68
   5   3  -3   -0.03    0.36
  -5  -3   3   -1.00    0.76
  -5  -3   3    0.13    0.59
  -5  -3   3    2.27    1.14
  -5  -3   3    0.21    0.72
  -5  -3   3    0.26    0.76
  -5  -3   3    0.60    0.67
   4   3  -3    0.81    0.48
   4   3  -3    0.04    0.33
   4   3  -3    0.27    0.66
   4   3  -3   -0.42    0.46
   4   3  -3    0.04    0.53
   4   3  -3    0.36    0.53
   4   3  -3    0.24    0.54
   4   3  -3    1.75    0.60
  -4  -3   3    0.78    0.53
  -4  -3   3    0.41    0.57
  -4  -3   3   -0.75    0.51
  -4  -3   3    0.59    0.82
  -4  -3   3   -0.27    0.60
  -4  -3   3   -0.37    0.46
   3   3  -3    9.02    0.77
   3   3  -3    8.37    0.75
   3   3  -3    8.76    0.83
   3   3  -3   10.19    0.88
   3   3  -3    7.82    0.64
   3   3  -3    7.33    0.74
   3   3  -3    9.07    0.84
  -3  -3   3    7.56    0.79
  -3  -3   3    7.80    0.80
  -3  -3   3    8.95    0.95
  -3  -3   3    9.03    0.69
  -3  -3   3    8.80    0.68
  -3  -3   3    7.67    0.75
   2   3  -3   27.03    1.11
   2   3  -3   26.94    1.19
   2   3  -3   27.08    1.05
   2   3  -3   27.85    1.10
   2   3  -3   27.55    0.98
   2   3  -3   28.20    1.14
  -2  -3   3   24.82    1.11
  -2  -3   3   26.75    1.23
  -2  -3   3   28.72    1.12
  -2  -3   3   27.91    1.09
  -2  -3   3   26.38    0.96
   1   3  -3   33.00    1.13
   1   3  -3   33.39    1.17
   1   3  -3   33.50    1.14
   1   3  -3   33.59    1.26
   1   3  -3   36.03    1.02
  -1  -3   3   33.75    1.14
  -1  -3   3   33.57    1.24
  -1  -3   3   34.28    1.13
  -1  -3   3   33.50    1.26
  -1  -3   3   35.75    1.21
   0   3  -3    0.51    0.15
   0   3  -3    0.65    0.21
   0   3  -3    0.34    0.23
   0   3  -3    0.22    0.28
   0  -3   3    0.40    0.30
   0  -3   3    0.55    0.17
   0  -3   3    0.31    0.30
   0  -3   3    0.26    0.21
   0  -3   3    0.66    0.22
  -1   3  -3  109.49    2.79
  -1   3  -3  106.18    2.77
  -1   3  -3  111.72    2.73
  -1   3  -3  109.54    2.92
  -1   3  -3  113.67    2.99
   1  -3   3  110.93    2.79
   1  -3   3  108.39    2.93
   1  -3   3  107.08    2.55
   1  -3   3  104.78    2.94
  -2   3  -3   18.41    1.02
  -2   3  -3   16.55    0.91
  -2   3  -3   16.35    0.76
  -2   3  -3   17.09    0.89
   2  -3   3   16.88    0.85
   2  -3   3   16.75    0.99
   2  -3   3   17.27    0.81
   2  -3   3   17.17    0.93
  -3   3  -3    8.89    0.79
  -3   3  -3   10.62    0.97
  -3   3  -3    9.54    0.74
  -3   3  -3    9.04    0.83
   3  -3   3   10.68    0.93
   3  -3   3    8.65    0.81
   3  -3   3    8.80    0.46
   3  -3   3   10.36    0.88
   3  -3   3    9.14    0.73
   3  -3   3    7.29    0.87
  -4   3  -3    2.14    0.60
  -4   3  -3    3.05    0.89
  -4   3  -3    2.23    0.65
   4  -3   3    1.37    0.81
   4  -3   3    2.78    0.81
   4  -3   3    3.96    0.74
   4  -3   3    2.46    0.70
   4  -3   3    2.29    0.26
  -5   3  -3    8.01    1.04
  -5   3  -3   10.14    1.46
  -5   3  -3    7.64    0.52
  -5   3  -3    7.99    1.10
  -5   3  -3    8.26    1.14
   5  -3   3    6.57    1.26
   5  -3   3    8.09    0.44
   5  -3   3    6.60    1.16
   5  -3   3    8.26    1.16
  -6   3  -3    1.78    1.02
  -6   3  -3    2.81    1.20
   6  -3   3    2.63    1.21
   6  -3   3    1.89    1.28
   6  -3   3    1.61    1.33
   6  -3   3    1.32    0.90
  -7   3  -3    2.46    1.26
  -7   3  -3    1.86    1.39
  -7   3  -3    1.88    1.40
   7  -3   3    1.21    1.46
   7  -3   3   -0.16    1.85
   7  -3   3    1.47    1.66
   8   2  -3    6.33    2.32
   8   2  -3   -0.57    1.74
  -8  -2   3    5.02    1.85
  -8  -2   3    2.97    2.20
  -8  -2   3    2.07    1.66
   7   2  -3    3.29    1.41
   7   2  -3    3.83    1.61
   7   2  -3    4.13    1.37
  -7  -2   3    4.00    1.44
  -7  -2   3    3.54    1.26
  -7  -2   3    2.31    1.14
   6   2  -3    3.41    1.16
   6   2  -3    4.39    1.13
   6   2  -3    3.88    1.08
   6   2  -3    3.67    0.84
  -6  -2   3    3.65    0.81
  -6  -2   3    3.32    0.94
  -6  -2   3    2.82    1.03
  -6  -2   3    4.72    1.08
   5   2  -3   -0.34    0.65
   5   2  -3   -0.48    0.65
   5   2  -3    0.67    0.27
   5   2  -3    0.08    0.81
   5   2  -3   -0.18    0.73
  -5  -2   3    0.57    0.63
  -5  -2   3    0.01    0.57
  -5  -2   3    0.52    0.72
  -5  -2   3    1.10    0.86
  -5  -2   3   -1.30    0.57
  -5  -2   3   -0.15    1.05
   4   2  -3   20.81    0.84
   4   2  -3   22.32    1.23
   4   2  -3   20.09    1.27
   4   2  -3   19.81    1.01
   4   2  -3   23.89    1.16
   4   2  -3   22.83    1.31
   4   2  -3   20.65    1.35
  -4  -2   3   23.23    1.11
  -4  -2   3   21.40    1.21
  -4  -2   3   22.10    1.22
  -4  -2   3   21.01    1.33
  -4  -2   3   20.68    1.21
  -4  -2   3   22.66    1.54
   3   2  -3   26.05    1.26
   3   2  -3   27.07    1.24
   3   2  -3   26.94    1.09
   3   2  -3   27.26    1.22
   3   2  -3   27.07    0.94
   3   2  -3   24.99    1.16
   3   2  -3   25.72    1.02
  -3  -2   3   24.55    1.12
  -3  -2   3   25.59    1.10
  -3  -2   3   26.93    1.29
  -3  -2   3   26.71    1.25
  -3  -2   3   25.52    1.07
  -3  -2   3   25.73    1.17
   2   2  -3   43.66    1.31
   2   2  -3   44.75    1.55
   2   2  -3   44.82    1.35
   2   2  -3   45.04    1.50
  -2  -2   3   46.24    1.45
  -2  -2   3   46.44    1.56
  -2  -2   3   45.05    1.44
  -2  -2   3   45.59    1.53
  -2  -2   3   44.15    1.45
  -2  -2   3   43.36    1.33
   1   2  -3   10.54    0.56
   1   2  -3   11.43    0.43
   1   2  -3   12.01    0.61
   1   2  -3   12.41    0.58
   1   2  -3   11.71    0.55
  -1  -2   3   12.47    0.59
  -1  -2   3   11.75    0.43
  -1  -2   3   10.91    0.56
  -1  -2   3   11.01    0.61
  -1  -2   3   12.57    0.61
   0   2  -3  536.69   12.71
   0   2  -3  561.81   12.52
   0   2  -3  592.39   12.65
   0   2  -3  575.40   12.60
   0   2  -3  583.45   12.76
   0  -2   3  566.61   12.60
   0  -2   3  575.03   12.64
   0  -2   3  576.84   12.76
  -1   2  -3   91.43    2.34
  -1   2  -3   89.52    2.40
  -1   2  -3   92.27    2.22
  -1   2  -3   91.04    2.48
  -1   2  -3   93.35    2.30
   1  -2   3   92.63    2.43
   1  -2   3   86.30    2.47
   1  -2   3   92.55    2.32
   1  -2   3   90.16    2.22
  -2   2  -3  242.69    5.76
  -2   2  -3  252.12    5.64
  -2   2  -3  244.08    5.75
  -2   2  -3  223.76    6.12
   2  -2   3  244.99    5.63
   2  -2   3  229.26    5.96
   2  -2   3  244.23    5.91
   2  -2   3  241.51    5.49
  -3   2  -3    0.41    0.33
  -3   2  -3   -0.15    0.56
  -3   2  -3    0.78    0.38
   3  -2   3    0.94    0.42
   3  -2   3    0.83    0.20
   3  -2   3    0.61    0.46
   3  -2   3   -0.06    0.38
   3  -2   3    1.31    0.54
  -4   2  -3    9.55    0.97
  -4   2  -3    9.90    0.99
  -4   2  -3    8.48    1.06
  -4   2  -3   10.46    0.98
  -4   2  -3    9.12    0.46
   4  -2   3    8.76    0.89
   4  -2   3    9.14    1.02
   4  -2   3    9.85    0.98
   4  -2   3    8.38    1.03
   4  -2   3    8.02    0.60
  -5   2  -3    0.78    0.79
  -5   2  -3    1.36    0.69
  -5   2  -3   -1.80    1.17
  -5   2  -3    1.40    0.82
   5  -2   3    0.03    1.05
   5  -2   3    1.97    0.81
   5  -2   3   -0.08    0.82
  -6   2  -3    1.29    0.98
  -6   2  -3    2.36    0.99
  -6   2  -3    1.69    0.89
   6  -2   3    1.87    1.22
   6  -2   3    2.60    1.16
   6  -2   3    1.89    0.89
   6  -2   3    1.80    1.30
  -7   2  -3    0.60    1.12
  -7   2  -3    1.48    1.41
  -7   2  -3   -2.28    1.40
   7  -2   3    0.25    1.12
   7  -2   3    2.36    1.73
   7  -2   3    0.21    1.80
  -8   2  -3   -0.17    1.64
  -8   2  -3    1.40    1.91
   8  -2   3   -0.44    1.88
   8  -2   3   -3.04    2.14
   8   1  -3    0.60    1.87
   8   1  -3   -2.05    1.91
  -8  -1   3   -0.83    1.62
  -8  -1   3   -1.44    1.55
  -8  -1   3    0.88    2.01
   7   1  -3    0.76    1.25
   7   1  -3    1.85    1.39
  -7  -1   3    2.62    1.29
  -7  -1   3    1.16    1.17
  -7  -1   3    0.02    1.30
   6   1  -3    1.89    0.71
   6   1  -3    0.72    0.86
   6   1  -3    1.99    0.98
   6   1  -3    1.29    1.13
  -6  -1   3    2.32    0.67
  -6  -1   3    3.33    1.52
  -6  -1   3    1.57    0.83
  -6  -1   3    1.48    1.00
  -6  -1   3    2.58    0.93
   5   1  -3    7.66    0.98
   5   1  -3    8.53    1.05
   5   1  -3    7.09    0.71
   5   1  -3    8.93    1.12
   5   1  -3    7.07    0.89
  -5  -1   3    8.02    1.00
  -5  -1   3   10.03    0.95
  -5  -1   3    8.08    1.01
  -5  -1   3    7.36    1.01
  -5  -1   3    9.33    0.93
  -5  -1   3    6.52    1.10
  -5  -1   3    7.99    1.24
   4   1  -3    1.72    0.65
   4   1  -3    1.81    0.38
   4   1  -3    1.27    0.52
   4   1  -3    1.26    0.49
   4   1  -3    1.88    0.28
   4   1  -3    1.80    0.59
  -4  -1   3    1.62    0.47
  -4  -1   3    1.51    0.44
  -4  -1   3    1.19    0.54
  -4  -1   3    0.77    0.65
  -4  -1   3    1.87    0.57
  -4  -1   3    2.07    0.52
   3   1  -3   -0.29    0.34
   3   1  -3    0.12    0.22
   3   1  -3    0.74    0.36
   3   1  -3   -0.18    0.18
   3   1  -3    0.54    0.38
   3   1  -3    0.15    0.30
   3   1  -3    0.05    0.31
  -3  -1   3    0.29    0.44
  -3  -1   3    0.31    0.32
  -3  -1   3    0.46    0.30
  -3  -1   3    0.49    0.34
  -3  -1   3    0.76    0.33
  -3  -1   3    0.24    0.28
   2   1  -3   21.96    0.78
   2   1  -3   22.69    0.73
   2   1  -3   23.51    0.91
   2   1  -3   21.82    0.76
   2   1  -3   23.47    1.02
   2   1  -3   23.40    0.81
   2   1  -3   21.15    0.94
  -2  -1   3   22.27    0.93
  -2  -1   3   22.85    0.87
  -2  -1   3   22.94    0.82
  -2  -1   3   24.28    0.92
  -2  -1   3   19.38    0.87
  -2  -1   3   22.21    0.89
  -2  -1   3   23.17    0.98
   1   1  -3   23.16    0.73
   1   1  -3   24.14    0.67
   1   1  -3   23.67    0.66
   1   1  -3   24.59    0.81
   1   1  -3   25.04    0.72
   1   1  -3   25.08    0.81
  -1  -1   3   24.67    0.91
  -1  -1   3   24.94    0.86
  -1  -1   3   24.13    0.79
  -1  -1   3   24.33    0.66
  -1  -1   3   24.03    0.80
  -1  -1   3   24.19    0.66
  -1  -1   3   24.39    0.77
   0   1  -3   52.98    1.33
   0   1  -3   52.72    1.37
   0   1  -3   51.93    1.37
   0   1  -3   52.23    1.22
   0   1  -3   51.20    1.39
   0   1  -3   51.40    1.42
   0  -1   3   50.30    1.42
   0  -1   3   53.77    1.38
   0  -1   3   52.05    1.32
   0  -1   3   51.14    1.39
   0  -1   3   52.33    1.22
  -1   1  -3   10.61    0.61
  -1   1  -3   10.51    0.54
  -1   1  -3   10.60    0.39
  -1   1  -3   10.91    0.45
  -1   1  -3   10.63    0.48
   1  -1   3   10.41    0.46
   1  -1   3   10.45    0.38
   1  -1   3   11.63    0.56
   1  -1   3   11.38    0.50
   1  -1   3    9.46    0.61
  -2   1  -3   33.17    0.99
  -2   1  -3   35.14    1.09
  -2   1  -3   34.79    1.34
  -2   1  -3   35.41    1.22
  -2   1  -3   35.91    1.06
  -2   1  -3   34.74    1.24
   2  -1   3   33.44    1.36
   2  -1   3   34.69    1.05
   2  -1   3   36.72    1.23
   2  -1   3   34.72    1.22
  -3   1  -3   91.03    2.80
  -3   1  -3   95.12    2.67
  -3   1  -3   85.47    2.62
  -3   1  -3   84.81    2.13
  -3   1  -3   87.25    2.50
  -3   1  -3   88.49    2.30
   3  -1   3   93.01    2.66
   3  -1   3   91.09    2.46
   3  -1   3   91.55    2.80
   3  -1   3   89.02    2.57
   3  -1   3   89.43    2.71
  -4   1  -3    3.82    0.70
  -4   1  -3    3.08    0.41
  -4   1  -3    3.20    0.59
  -4   1  -3    2.72    0.80
  -4   1  -3    3.24    0.19
  -4   1  -3    3.29    0.62
   4  -1   3    3.08    0.74
   4  -1   3    5.01    0.55
   4  -1   3    4.45    0.72
   4  -1   3    2.84    0.83
   4  -1   3    2.48    0.66
  -5   1  -3   23.01    1.42
  -5   1  -3   25.35    1.52
  -5   1  -3   24.98    1.54
  -5   1  -3   24.66    1.08
  -5   1  -3   23.82    1.57
  -5   1  -3   25.13    2.01
   5  -1   3   24.49    1.72
   5  -1   3   22.41    1.07
   5  -1   3   25.58    1.56
   5  -1   3   27.42    2.02
  -6   1  -3   -0.60    0.87
  -6   1  -3    0.10    0.93
  -6   1  -3    0.22    0.83
   6  -1   3    1.63    1.31
   6  -1   3    1.09    0.53
   6  -1   3    0.55    1.20
   6  -1   3    0.19    1.12
  -7   1  -3    1.66    1.24
  -7   1  -3    1.78    1.35
  -7   1  -3    1.07    1.41
   7  -1   3    4.77    1.50
   7  -1   3    0.02    1.21
   7  -1   3    2.56    1.81
  -8   1  -3   -1.05    1.86
  -8   1  -3    2.83    1.89
  -8   1  -3    1.03    1.58
   8  -1   3    0.30    2.15
   8  -1   3   -0.44    1.89
   8   0  -3   -3.87    1.80
   8   0  -3   -0.41    2.03
  -8   0   3    3.03    1.86
  -8   0   3    0.59    1.84
  -8   0   3    0.16    1.53
   7   0  -3    0.01    1.17
   7   0  -3    2.90    1.54
  -7   0   3    0.24    1.20
  -7   0   3    2.50    1.36
  -7   0   3    0.54    1.12
   6   0  -3   -0.63    1.04
   6   0  -3    0.49    0.58
   6   0  -3   -1.23    0.77
  -6   0   3    0.45    0.57
  -6   0   3   -1.05    0.81
  -6   0   3   -0.24    0.89
  -6   0   3    1.76    0.93
  -6   0   3    0.74    1.37
   5   0  -3    6.56    0.60
   5   0  -3    7.30    0.98
   5   0  -3    5.58    1.00
   5   0  -3    6.44    0.91
  -5   0   3    6.76    0.93
  -5   0   3    8.28    1.10
  -5   0   3    7.61    0.94
  -5   0   3    6.75    1.11
  -5   0   3    6.77    0.90
  -5   0   3    7.99    0.93
   4   0  -3   -0.02    0.22
   4   0  -3   -0.08    0.27
   4   0  -3   -0.29    0.43
   4   0  -3   -0.22    0.34
   4   0  -3    0.34    0.50
   4   0  -3   -0.40    0.47
  -4   0   3   -0.19    0.43
  -4   0   3   -0.09    0.46
  -4   0   3   -0.27    0.58
  -4   0   3   -0.38    0.40
  -4   0   3   -0.07    0.31
  -4   0   3   -0.04    0.50
  -4   0   3    0.38    0.42
   3   0  -3   29.46    0.90
   3   0  -3   30.73    1.18
   3   0  -3   28.86    0.84
   3   0  -3   30.32    1.37
   3   0  -3   29.45    0.94
   3   0  -3   29.16    1.24
  -3   0   3   28.36    1.13
  -3   0   3   29.35    1.05
  -3   0   3   31.51    1.23
  -3   0   3   29.30    1.32
  -3   0   3   28.51    0.93
  -3   0   3   30.31    1.20
  -3   0   3   29.91    1.03
  -3   0   3   30.33    1.25
   2   0  -3   -0.20    0.14
   2   0  -3   -0.07    0.23
   2   0  -3   -0.12    0.22
   2   0  -3   -0.10    0.18
   2   0  -3    0.08    0.27
  -2   0   3   -0.02    0.22
  -2   0   3   -0.12    0.20
  -2   0   3    0.09    0.24
  -2   0   3    0.18    0.24
  -2   0   3   -0.17    0.16
  -2   0   3    0.35    0.23
  -2   0   3   -0.10    0.18
  -2   0   3   -0.12    0.21
  -2   0   3   -0.04    0.14
   1   0  -3  285.24    6.30
   1   0  -3  276.30    6.35
   1   0  -3  272.80    6.18
   1   0  -3  277.41    6.21
   1   0  -3  274.49    6.10
   1   0  -3  265.31    6.17
  -1   0   3  276.04    6.00
  -1   0   3  270.81    6.18
  -1   0   3  272.42    6.27
  -1   0   3  269.07    6.17
  -1   0   3  273.61    6.22
  -1   0   3  272.61    6.00
  -1   0   3  287.73    6.36
  -1   0   3  269.71    6.20
  -1   0   3  275.22    6.10
   0   0  -3    0.03    0.06
   0   0  -3    0.06    0.11
   0   0  -3    0.02    0.11
   0   0  -3    0.07    0.05
   0   0  -3    0.04    0.09
   0   0  -3   -0.08    0.07
   0   0  -3    0.10    0.12
   0   0   3    0.12    0.12
   0   0   3    0.06    0.12
   0   0   3    0.04    0.12
   0   0   3    0.10    0.07
   0   0   3   -0.06    0.08
   0   0   3   -0.06    0.05
   0   0   3    0.07    0.06
  -1   0  -3   66.29    1.81
  -1   0  -3   64.34    1.76
  -1   0  -3   64.41    1.69
  -1   0  -3   63.05    1.67
  -1   0  -3   63.23    1.61
   1   0   3   65.75    1.73
   1   0   3   65.65    1.68
   1   0   3   63.72    1.62
   1   0   3   62.49    1.67
  -2   0  -3   -0.03    0.11
  -2   0  -3    0.05    0.17
  -2   0  -3   -0.07    0.27
  -2   0  -3   -0.13    0.26
  -2   0  -3   -0.28    0.34
   2   0   3   -0.17    0.35
   2   0   3    0.42    0.24
  -3   0  -3    8.23    0.33
  -3   0  -3    7.53    0.52
  -3   0  -3    7.35    0.61
  -3   0  -3    9.25    0.75
  -3   0  -3    7.61    0.76
  -3   0  -3    8.76    0.77
   3   0   3    8.12    0.69
   3   0   3    7.39    0.64
   3   0   3    6.58    0.80
   3   0   3    8.35    0.58
   3   0   3    8.24    0.75
  -4   0  -3    0.77    0.71
  -4   0  -3    0.29    0.44
  -4   0  -3   -0.04    0.51
  -4   0  -3   -0.26    0.42
  -4   0  -3    0.11    0.41
  -4   0  -3    0.07    0.34
   4   0   3    0.71    0.59
   4   0   3    0.82    0.72
   4   0   3    0.38    0.50
   4   0   3    0.44    0.35
   4   0   3   -0.16    0.51
  -5   0  -3    2.30    0.77
  -5   0  -3    2.17    0.77
  -5   0  -3    3.60    0.78
  -5   0  -3    1.59    0.50
  -5   0  -3    4.17    1.18
  -5   0  -3    2.80    0.82
   5   0   3    2.41    0.78
   5   0   3    3.82    0.86
   5   0   3    2.40    0.57
   5   0   3    2.39    1.04
  -6   0  -3   -0.47    0.89
  -6   0  -3    0.01    0.85
  -6   0  -3    0.64    0.61
  -6   0  -3    1.49    1.02
   6   0   3   -2.25    1.37
   6   0   3   -1.64    1.06
   6   0   3   -0.05    0.62
  -7   0  -3    1.19    1.16
  -7   0  -3   -0.10    1.34
  -7   0  -3   -0.86    1.31
   7   0   3   -0.08    1.27
   7   0   3   -0.92    1.42
   7   0   3    0.65    0.83
   7   0   3    3.08    2.10
  -8   0  -3   -2.06    1.58
  -8   0  -3   -0.99    1.77
  -8   0  -3   -2.44    1.65
   8   0   3   -0.27    2.46
   8   0   3   -2.54    1.80
   8   0   3   -2.82    1.95
   8  -1  -3    1.35    2.12
   8  -1  -3    3.13    1.81
  -8   1   3    1.28    1.87
  -8   1   3   -1.77    1.53
  -8   1   3    2.23    1.72
   7  -1  -3    1.22    1.50
   7  -1  -3   -0.87    1.35
  -7   1   3    2.03    1.16
  -7   1   3    0.92    1.26
  -7   1   3   -0.13    1.04
   6  -1  -3    1.60    0.28
   6  -1  -3    0.63    1.05
   6  -1  -3    0.23    0.92
  -6   1   3    0.43    1.65
  -6   1   3    0.74    0.44
  -6   1   3    1.16    0.79
  -6   1   3    0.77    1.36
  -6   1   3    1.63    0.84
   5  -1  -3    7.70    0.96
   5  -1  -3    8.29    0.58
   5  -1  -3    6.46    0.97
   5  -1  -3    6.83    0.50
   5  -1  -3    8.06    1.12
  -5   1   3    6.81    1.10
  -5   1   3    6.04    0.62
  -5   1   3    8.43    1.00
  -5   1   3    6.02    0.83
  -5   1   3    9.17    1.08
  -5   1   3   10.08    1.17
  -5   1   3    8.75    1.06
   4  -1  -3    1.69    0.18
   4  -1  -3    1.51    0.53
   4  -1  -3    1.04    0.49
   4  -1  -3    1.82    0.64
  -4   1   3    1.38    0.47
  -4   1   3    1.92    0.33
  -4   1   3    1.37    0.30
  -4   1   3    1.43    0.47
  -4   1   3    2.29    0.69
  -4   1   3    2.29    0.60
  -4   1   3    2.43    0.49
   3  -1  -3    0.46    0.31
   3  -1  -3   -0.27    0.33
   3  -1  -3    0.28    0.32
  -3   1   3    0.11    0.20
  -3   1   3    0.26    0.30
  -3   1   3    0.41    0.32
  -3   1   3    0.33    0.20
  -3   1   3    0.52    0.27
  -3   1   3    0.00    0.34
  -3   1   3    0.15    0.30
  -3   1   3    0.08    0.30
  -3   1   3    0.31    0.38
   2  -1  -3   20.55    0.90
   2  -1  -3   20.28    0.74
   2  -1  -3   22.12    0.99
   2  -1  -3   22.24    0.83
   2  -1  -3   21.60    0.87
  -2   1   3   21.55    0.75
  -2   1   3   21.62    0.60
  -2   1   3   21.90    0.91
  -2   1   3   22.33    0.86
  -2   1   3   20.16    0.84
  -2   1   3   20.86    0.66
  -2   1   3   22.04    0.88
  -2   1   3   21.18    0.96
  -2   1   3   21.83    0.86
   1  -1  -3   23.23    0.85
   1  -1  -3   22.98    0.82
   1  -1  -3   23.93    0.81
   1  -1  -3   24.00    0.81
   1  -1  -3   24.71    0.80
  -1   1   3   24.93    0.82
  -1   1   3   25.47    0.83
  -1   1   3   23.44    0.76
  -1   1   3   24.48    0.79
  -1   1   3   24.08    0.86
  -1   1   3   23.85    0.76
  -1   1   3   24.39    0.83
   0  -1  -3   52.45    1.28
   0  -1  -3   49.64    1.37
   0  -1  -3   50.80    1.40
   0  -1  -3   52.05    1.29
   0  -1  -3   54.49    1.41
   0  -1  -3   50.77    1.26
   0   1   3   52.48    1.32
   0   1   3   50.97    1.40
   0   1   3   53.38    1.38
   0   1   3   51.01    1.39
   0   1   3   49.45    1.31
   0   1   3   49.47    1.28
   0   1   3   51.68    1.28
  -1  -1  -3   10.87    0.40
  -1  -1  -3   10.64    0.52
  -1  -1  -3   11.07    0.46
  -1  -1  -3   11.82    0.62
  -1  -1  -3   11.41    0.53
  -1  -1  -3    9.79    0.59
   1   1   3   10.01    0.72
   1   1   3   12.07    0.57
   1   1   3   11.29    0.46
   1   1   3   11.78    0.52
  -2  -1  -3   35.65    1.12
  -2  -1  -3   35.48    1.25
  -2  -1  -3   36.31    1.00
  -2  -1  -3   32.30    1.50
  -2  -1  -3   37.32    1.30
  -2  -1  -3   36.60    1.18
   2   1   3   36.56    1.18
   2   1   3   36.22    1.19
   2   1   3   34.07    1.22
   2   1   3   38.18    1.43
   2   1   3   31.97    1.37
   2   1   3   36.46    0.99
  -3  -1  -3   87.31    2.66
  -3  -1  -3   89.73    2.65
  -3  -1  -3   96.06    2.89
  -3  -1  -3   90.59    2.50
  -3  -1  -3   91.66    2.45
   3   1   3   90.33    2.11
   3   1   3   87.64    2.44
   3   1   3   90.25    2.63
   3   1   3   83.35    2.81
   3   1   3   87.56    2.60
   3   1   3   89.83    2.61
  -4  -1  -3    2.03    0.59
  -4  -1  -3    3.45    0.71
  -4  -1  -3    2.93    0.46
  -4  -1  -3    2.70    0.58
  -4  -1  -3    2.54    0.87
   4   1   3    3.28    0.55
   4   1   3    2.87    0.63
   4   1   3    2.43    0.63
   4   1   3    2.46    0.86
  -5  -1  -3   25.35    2.11
  -5  -1  -3   22.66    1.58
  -5  -1  -3   23.24    1.42
  -5  -1  -3   25.61    1.63
  -5  -1  -3   26.79    1.65
  -5  -1  -3   21.69    1.27
   5   1   3   25.53    1.50
   5   1   3   24.72    1.31
   5   1   3   23.29    1.91
   5   1   3   22.81    1.61
  -6  -1  -3   -0.89    0.73
  -6  -1  -3   -0.71    0.92
  -6  -1  -3   -0.36    0.97
  -6  -1  -3   -0.86    0.69
   6   1   3    1.17    1.32
   6   1   3    0.78    0.96
   6   1   3    0.11    0.71
  -7  -1  -3    0.77    1.39
  -7  -1  -3   -0.29    1.16
  -7  -1  -3    2.48    1.27
   7   1   3    1.16    1.86
   7   1   3    2.16    1.37
   7   1   3    1.77    1.56
   7   1   3   -0.57    0.93
  -8  -1  -3   -1.42    1.93
  -8  -1  -3    4.29    1.70
  -8  -1  -3    4.81    1.77
   8   1   3   -0.22    1.79
   8   1   3    0.50    2.64
   8   1   3    1.71    2.01
   8  -2  -3    1.84    2.21
   8  -2  -3    2.66    1.74
  -8   2   3    0.82    1.88
  -8   2   3    2.88    1.67
  -8   2   3    4.39    1.71
   7  -2  -3    3.97    1.36
   7  -2  -3    3.60    1.59
  -7   2   3    2.29    1.22
  -7   2   3    0.76    1.14
  -7   2   3    3.48    1.25
   6  -2  -3    5.13    1.29
   6  -2  -3    3.25    0.97
  -6   2   3    3.74    1.01
  -6   2   3    1.74    0.93
  -6   2   3    2.38    1.45
  -6   2   3    3.52    1.00
  -6   2   3    4.38    0.42
   5  -2  -3    1.29    0.78
   5  -2  -3    0.35    0.65
   5  -2  -3    0.48    0.65
  -5   2   3    0.21    0.81
  -5   2   3   -0.39    0.30
  -5   2   3   -0.17    0.55
  -5   2   3    0.46    0.64
  -5   2   3    1.60    0.68
  -5   2   3    0.05    0.24
   4  -2  -3   19.69    1.21
   4  -2  -3   19.56    1.22
   4  -2  -3   20.21    1.38
  -4   2   3   20.72    1.25
  -4   2   3   21.62    1.20
  -4   2   3   22.04    0.85
  -4   2   3   21.32    1.03
  -4   2   3   23.24    1.33
  -4   2   3   20.57    1.20
  -4   2   3   20.26    0.71
   3  -2  -3   25.16    1.28
   3  -2  -3   24.75    1.19
   3  -2  -3   25.80    1.13
   3  -2  -3   26.03    1.11
  -3   2   3   26.25    0.94
  -3   2   3   25.74    1.18
  -3   2   3   25.32    0.78
  -3   2   3   24.42    1.24
  -3   2   3   24.82    0.99
  -3   2   3   23.12    1.15
  -3   2   3   25.73    1.17
  -3   2   3   24.27    0.98
  -3   2   3   28.00    1.20
   2  -2  -3   44.31    1.52
   2  -2  -3   43.77    1.40
   2  -2  -3   42.55    1.33
   2  -2  -3   42.27    1.45
  -2   2   3   43.35    1.46
  -2   2   3   42.51    1.16
  -2   2   3   42.58    1.29
  -2   2   3   42.31    1.08
  -2   2   3   43.35    1.49
  -2   2   3   40.88    1.38
  -2   2   3   43.19    1.10
  -2   2   3   41.74    1.30
   1  -2  -3   12.03    0.50
   1  -2  -3   12.32    0.61
   1  -2  -3   12.20    0.57
   1  -2  -3   12.18    0.53
   1  -2  -3   12.93    0.66
  -1   2   3   11.99    0.49
  -1   2   3   11.96    0.53
  -1   2   3   12.70    0.64
  -1   2   3   12.18    0.58
  -1   2   3   12.07    0.55
  -1   2   3   12.05    0.59
   0  -2  -3  586.29   12.70
   0  -2  -3  568.29   12.71
   0  -2  -3  566.08   12.78
   0  -2  -3  587.46   12.84
   0   2   3  581.54   12.78
   0   2   3  599.48   12.90
   0   2   3  580.36   12.73
   0   2   3  549.86   12.84
   0   2   3  592.71   12.84
   0   2   3  588.51   12.79
   0   2   3  555.74   12.72
  -1  -2  -3   96.70    2.46
  -1  -2  -3   95.16    2.45
  -1  -2  -3   92.13    2.21
  -1  -2  -3   94.39    2.43
  -1  -2  -3   96.69    2.53
  -1  -2  -3   95.71    2.44
   1   2   3   93.31    2.21
   1   2   3   94.22    2.44
   1   2   3   94.57    2.34
   1   2   3   87.13    2.53
   1   2   3   94.23    2.42
   1   2   3   90.51    2.43
  -2  -2  -3  251.81    5.83
  -2  -2  -3  243.79    5.89
  -2  -2  -3  242.04    5.92
  -2  -2  -3  242.24    6.05
  -2  -2  -3  248.69    5.70
   2   2   3  246.24    5.61
   2   2   3  259.61    5.92
   2   2   3  243.62    6.11
   2   2   3  238.33    5.70
   2   2   3  250.74    5.91
   2   2   3  242.35    5.83
   2   2   3  238.43    5.67
  -3  -2  -3    0.62    0.32
  -3  -2  -3    0.43    0.51
  -3  -2  -3    0.75    0.36
  -3  -2  -3   -0.06    0.56
  -3  -2  -3    0.67    0.42
   3   2   3    0.38    0.34
   3   2   3    0.47    0.41
   3   2   3    0.88    0.34
   3   2   3    0.63    0.64
   3   2   3    0.36    0.19
   3   2   3   -0.17    0.41
  -4  -2  -3    9.71    0.92
  -4  -2  -3    9.17    0.81
  -4  -2  -3    9.43    0.94
  -4  -2  -3   10.46    1.18
  -4  -2  -3    9.04    1.02
   4   2   3    8.49    0.80
   4   2   3    8.88    0.93
   4   2   3    9.20    0.38
   4   2   3   10.54    1.04
   4   2   3    9.66    0.97
   4   2   3    9.03    1.17
  -5  -2  -3    2.00    0.59
  -5  -2  -3    1.11    0.82
  -5  -2  -3    1.32    0.66
  -5  -2  -3    0.44    0.63
   5   2   3    0.97    0.61
   5   2   3    1.22    1.10
   5   2   3    0.18    0.82
   5   2   3    1.94    0.73
  -6  -2  -3    1.38    1.15
  -6  -2  -3    2.47    0.90
  -6  -2  -3    2.89    0.97
  -6  -2  -3    0.90    0.85
   6   2   3    1.26    0.82
   6   2   3    2.29    1.03
   6   2   3   -0.65    1.55
  -7  -2  -3    0.70    1.29
  -7  -2  -3    2.91    1.46
  -7  -2  -3    0.23    1.33
   7   2   3    1.16    1.01
   7   2   3    1.18    1.37
   7   2   3   -0.80    1.74
   7   2   3    1.58    1.44
  -8  -2  -3   -0.37    1.78
  -8  -2  -3    2.94    2.06
  -8  -2  -3   -0.03    1.56
   8   2   3    2.47    2.44
   8   2   3   -3.33    1.91
   8   2   3   -1.05    1.80
   8  -3  -3   -0.53    1.84
   8  -3  -3   -1.81    2.15
  -8   3   3   -1.63    1.59
  -8   3   3    0.10    1.69
  -8   3   3   -2.53    1.76
   7  -3  -3   -0.49    1.55
   7  -3  -3    1.37    1.33
  -7   3   3   -0.61    1.19
  -7   3   3   -0.11    1.11
  -7   3   3    0.20    1.25
   6  -3  -3    4.03    1.28
   6  -3  -3    4.25    1.01
  -6   3   3    3.39    0.94
  -6   3   3    0.52    1.37
  -6   3   3    2.03    0.50
  -6   3   3    2.79    0.97
  -6   3   3    2.98    1.00
   5  -3  -3    0.56    0.66
   5  -3  -3   -0.65    0.77
   5  -3  -3   -0.38    0.83
  -5   3   3   -0.08    0.38
  -5   3   3   -0.54    0.56
  -5   3   3    0.59    0.90
  -5   3   3    0.72    0.69
  -5   3   3    0.42    0.66
   4  -3  -3    0.17    0.42
   4  -3  -3    0.23    0.53
   4  -3  -3   -0.71    0.54
   4  -3  -3   -0.81    0.54
  -4   3   3    0.18    0.09
  -4   3   3   -0.16    0.56
  -4   3   3    0.80    0.35
  -4   3   3    0.16    0.58
  -4   3   3    0.24    0.11
  -4   3   3   -0.32    0.51
  -4   3   3   -0.20    0.37
  -4   3   3   -0.67    0.54
  -4   3   3   -0.07    0.66
   3  -3  -3    8.72    0.84
   3  -3  -3    8.14    0.74
   3  -3  -3    9.58    0.70
   3  -3  -3    9.02    0.81
  -3   3   3    7.79    0.63
  -3   3   3    8.84    0.86
  -3   3   3    9.58    0.69
  -3   3   3    8.75    0.90
  -3   3   3    8.69    0.62
  -3   3   3    8.41    0.62
  -3   3   3    8.40    0.78
  -3   3   3    8.68    0.73
  -3   3   3    8.81    0.38
   2  -3  -3   25.75    1.12
   2  -3  -3   26.58    0.95
   2  -3  -3   24.75    1.11
  -2   3   3   26.33    0.84
  -2   3   3   26.18    0.81
  -2   3   3   25.27    1.14
  -2   3   3   26.13    0.98
  -2   3   3   26.05    0.93
  -2   3   3   27.30    1.12
  -2   3   3   25.43    1.07
  -2   3   3   25.82    0.83
   1  -3  -3   35.88    1.07
   1  -3  -3   33.94    1.25
   1  -3  -3   33.38    1.12
   1  -3  -3   35.10    1.22
  -1   3   3   34.79    1.11
  -1   3   3   35.57    1.17
  -1   3   3   34.40    1.01
  -1   3   3   34.18    0.98
  -1   3   3   34.69    1.05
  -1   3   3   34.63    1.24
  -1   3   3   34.62    1.19
   0  -3  -3    0.92    0.23
   0  -3  -3    0.63    0.12
   0  -3  -3    0.72    0.24
   0  -3  -3    0.79    0.23
   0  -3  -3    0.88    0.22
   0  -3  -3    0.61    0.25
   0  -3  -3    0.73    0.15
   0   3   3    0.97    0.29
   0   3   3    0.47    0.23
   0   3   3    0.97    0.25
   0   3   3    0.55    0.14
   0   3   3    0.69    0.24
   0   3   3    0.95    0.13
  -1  -3  -3  108.89    2.84
  -1  -3  -3  106.46    2.58
  -1  -3  -3  105.75    2.82
  -1  -3  -3  105.41    2.82
  -1  -3  -3  105.99    2.90
  -1  -3  -3  112.50    2.84
   1   3   3  106.81    2.82
   1   3   3  108.39    2.99
   1   3   3  108.27    2.84
   1   3   3  107.77    2.42
   1   3   3  112.60    2.60
   1   3   3  109.78    2.82
  -2  -3  -3   17.22    0.76
  -2  -3  -3   18.35    0.96
  -2  -3  -3   18.38    1.06
  -2  -3  -3   16.46    0.90
  -2  -3  -3   17.03    0.85
   2   3   3   15.76    1.10
   2   3   3   18.25    0.76
   2   3   3   17.64    0.69
   2   3   3   19.20    0.95
   2   3   3   18.15    0.75
   2   3   3   18.04    0.90
   2   3   3   16.89    0.87
  -3  -3  -3   10.45    0.77
  -3  -3  -3    9.29    0.80
  -3  -3  -3    9.74    0.86
  -3  -3  -3   10.17    0.69
  -3  -3  -3    8.57    0.98
   3   3   3    9.32    0.73
   3   3   3    9.33    0.88
   3   3   3    9.33    0.77
   3   3   3   10.28    0.85
   3   3   3    9.93    0.72
   3   3   3    9.27    0.55
   3   3   3    8.88    1.02
  -4  -3  -3    1.66    0.92
  -4  -3  -3    2.11    0.55
  -4  -3  -3    2.46    0.57
  -4  -3  -3    1.64    0.63
  -4  -3  -3    2.33    0.77
   4   3   3    2.49    0.87
   4   3   3    2.91    0.71
   4   3   3    1.53    0.58
   4   3   3    3.38    0.75
   4   3   3    1.39    0.56
   4   3   3    2.54    0.32
  -5  -3  -3    8.51    1.23
  -5  -3  -3    8.13    0.93
  -5  -3  -3    6.58    1.04
  -5  -3  -3    8.10    0.99
   5   3   3    7.87    0.98
   5   3   3    7.96    1.60
   5   3   3    8.16    1.05
   5   3   3    6.64    1.09
  -6  -3  -3    2.41    0.95
  -6  -3  -3    1.08    1.25
  -6  -3  -3    0.51    0.96
  -6  -3  -3    3.08    0.96
   6   3   3    1.12    0.95
   6   3   3    1.41    1.02
  -7  -3  -3    3.65    1.44
  -7  -3  -3    1.88    1.30
  -7  -3  -3    5.65    1.94
   7   3   3    1.55    1.21
   7   3   3   -2.04    1.85
   7   3   3    1.57    1.44
   7  -4  -3    4.61    1.91
   7  -4  -3    0.70    1.33
  -7   4   3   -0.51    1.19
  -7   4   3    1.48    1.34
  -7   4   3    0.76    1.25
   6  -4  -3    1.31    1.30
   6  -4  -3    1.20    0.95
  -6   4   3    1.14    0.93
  -6   4   3    0.63    1.36
  -6   4   3    1.70    0.97
  -6   4   3    2.04    1.09
   5  -4  -3   -0.35    0.78
   5  -4  -3   -0.39    0.72
  -5   4   3   -0.16    0.50
  -5   4   3    0.55    0.90
  -5   4   3   -0.78    0.59
  -5   4   3   -0.23    0.67
   4  -4  -3    2.03    0.72
   4  -4  -3    2.02    0.64
   4  -4  -3    1.85    0.68
   4  -4  -3    1.69    0.51
  -4   4   3    2.89    0.75
  -4   4   3    0.98    0.61
  -4   4   3    1.29    0.61
  -4   4   3    1.83    0.48
  -4   4   3    2.41    0.72
  -4   4   3    2.25    0.54
  -4   4   3    0.60    0.83
   3  -4  -3   48.40    1.88
   3  -4  -3   51.44    1.61
   3  -4  -3   50.87    1.97
  -3   4   3   51.60    1.94
  -3   4   3   49.77    1.90
  -3   4   3   50.27    1.59
  -3   4   3   49.40    1.91
  -3   4   3   50.95    1.60
  -3   4   3   55.20    1.70
  -3   4   3   53.23    1.67
  -3   4   3   50.29    1.29
  -3   4   3   48.67    1.88
   2  -4  -3   36.27    1.42
   2  -4  -3   36.58    1.43
   2  -4  -3   34.73    1.06
   2  -4  -3   34.65    1.14
  -2   4   3   34.75    1.43
  -2   4   3   36.42    1.39
  -2   4   3   36.35    1.15
  -2   4   3   35.05    1.37
  -2   4   3   34.03    1.34
  -2   4   3   34.87    1.16
  -2   4   3   34.99    1.29
  -2   4   3   35.49    1.06
   1  -4  -3   65.87    2.05
   1  -4  -3   68.76    1.66
   1  -4  -3   70.39    1.66
   1  -4  -3   66.70    2.03
   1  -4  -3   70.76    1.87
   1  -4  -3   69.01    2.11
  -1   4   3   66.05    1.87
  -1   4   3   66.27    1.81
  -1   4   3   67.97    1.87
  -1   4   3   68.88    1.80
  -1   4   3   59.69    2.04
  -1   4   3   71.24    2.05
  -1   4   3   70.45    1.88
  -1   4   3   69.54    2.09
   0  -4  -3    3.06    0.42
   0  -4  -3    2.52    0.45
   0  -4  -3    2.91    0.23
   0  -4  -3    2.58    0.27
   0  -4  -3    2.24    0.39
   0  -4  -3    2.23    0.35
   0  -4  -3    2.66    0.36
   0   4   3    2.76    0.38
   0   4   3    3.38    0.46
   0   4   3    2.95    0.49
   0   4   3    2.29    0.35
   0   4   3    2.55    0.28
  -1  -4  -3    7.27    0.57
  -1  -4  -3    8.52    0.77
  -1  -4  -3    7.40    0.61
  -1  -4  -3    7.02    0.66
   1   4   3    8.08    0.63
   1   4   3    6.80    0.42
   1   4   3    7.60    0.77
   1   4   3    6.27    0.59
   1   4   3    7.07    0.56
  -2  -4  -3   60.55    2.00
  -2  -4  -3   62.67    1.98
  -2  -4  -3   63.24    2.07
  -2  -4  -3   61.44    1.94
  -2  -4  -3   62.93    2.21
  -2  -4  -3   61.84    1.79
   2   4   3   63.50    2.04
   2   4   3   61.24    1.77
   2   4   3   61.24    1.63
   2   4   3   61.63    2.01
   2   4   3   61.86    1.99
   2   4   3   63.42    2.29
  -3  -4  -3   25.87    1.32
  -3  -4  -3   23.72    1.54
  -3  -4  -3   26.70    1.43
  -3  -4  -3   26.05    1.24
  -3  -4  -3   26.08    1.16
   3   4   3   26.13    1.65
   3   4   3   25.41    1.08
   3   4   3   25.62    1.29
   3   4   3   28.09    1.35
   3   4   3   24.36    1.00
   3   4   3   23.45    1.26
   3   4   3   25.98    1.14
  -4  -4  -3    2.09    0.66
  -4  -4  -3    3.01    0.97
  -4  -4  -3    1.93    0.79
  -4  -4  -3    2.84    0.63
  -4  -4  -3    1.73    0.63
   4   4   3    2.29    0.40
   4   4   3    1.84    0.65
   4   4   3    1.22    0.66
   4   4   3    2.10    0.74
   4   4   3    2.03    1.00
   4   4   3    2.55    0.61
   4   4   3    2.60    0.62
  -5  -4  -3    3.72    0.85
  -5  -4  -3    4.02    0.83
  -5  -4  -3    3.70    0.89
  -5  -4  -3    3.79    1.11
   5   4   3    2.81    0.39
   5   4   3    2.72    0.82
   5   4   3    3.64    0.89
   5   4   3    1.04    1.36
  -6  -4  -3    0.16    1.13
  -6  -4  -3   -0.06    0.84
  -6  -4  -3    1.54    1.06
   6   4   3   -0.14    0.98
   6   4   3    0.62    1.51
   6   4   3    0.18    0.94
  -7  -4  -3    4.86    1.54
  -7  -4  -3    3.37    1.32
  -7  -4  -3    4.30    1.84
   7   4   3    4.08    1.32
   7   4   3    4.54    1.61
   7   4   3    6.64    2.40
   7  -5  -3   -1.42    1.59
   7  -5  -3    2.13    1.27
  -7   5   3   -1.30    1.42
  -7   5   3    0.40    1.35
  -7   5   3   -1.03    1.36
   6  -5  -3   -0.16    0.84
   6  -5  -3   -2.29    1.23
  -6   5   3   -0.32    0.68
  -6   5   3   -0.70    0.96
  -6   5   3   -1.03    0.95
  -6   5   3    2.64    1.59
   5  -5  -3   -0.18    0.84
   5  -5  -3    2.00    1.58
   5  -5  -3    0.75    0.67
  -5   5   3   -0.72    1.01
  -5   5   3   -0.27    0.63
  -5   5   3    0.26    0.58
  -5   5   3   -0.02    0.81
   4  -5  -3    2.25    0.76
   4  -5  -3    1.93    0.52
   4  -5  -3    0.94    0.72
  -4   5   3    2.54    0.62
  -4   5   3    3.68    0.75
  -4   5   3    1.69    0.61
  -4   5   3    3.77    0.95
  -4   5   3    1.93    0.76
  -4   5   3    1.02    0.59
   3  -5  -3    0.06    0.31
   3  -5  -3    0.48    0.53
   3  -5  -3    0.07    0.47
  -3   5   3   -0.39    0.49
  -3   5   3   -0.11    0.46
  -3   5   3   -0.17    0.44
  -3   5   3    0.58    0.46
  -3   5   3    0.24    0.30
  -3   5   3   -0.05    0.18
  -3   5   3    0.24    0.49
  -3   5   3    0.48    0.69
   2  -5  -3    1.65    0.30
   2  -5  -3    1.83    0.54
   2  -5  -3    1.80    0.44
  -2   5   3    2.56    0.54
  -2   5   3    1.92    0.32
  -2   5   3    2.39    0.48
  -2   5   3    2.32    0.35
  -2   5   3    1.94    0.45
  -2   5   3    1.58    0.57
  -2   5   3    1.96    0.43
   1  -5  -3    0.00    0.32
   1  -5  -3    0.20    0.25
   1  -5  -3   -0.36    0.41
   1  -5  -3   -0.08    0.27
   1  -5  -3   -0.06    0.28
   1  -5  -3    0.47    0.28
  -1   5   3    0.40    0.42
  -1   5   3    0.17    0.24
  -1   5   3    0.46    0.36
  -1   5   3    0.48    0.41
  -1   5   3   -0.35    0.24
  -1   5   3    0.17    0.25
   0  -5  -3    1.20    0.18
   0  -5  -3    1.14    0.39
   0  -5  -3    1.20    0.29
   0  -5  -3    1.31    0.40
   0  -5  -3    1.27    0.40
   0  -5  -3    0.62    0.40
   0  -5  -3    1.29    0.33
   0   5   3    1.11    0.25
   0   5   3    1.15    0.36
   0   5   3    1.76    0.40
   0   5   3    0.97    0.41
   0   5   3    1.63    0.53
  -1  -5  -3    4.97    0.69
  -1  -5  -3    6.84    0.73
  -1  -5  -3    5.15    0.61
  -1  -5  -3    5.40    0.61
  -1  -5  -3    6.46    0.50
   1   5   3    6.56    0.47
   1   5   3    6.57    0.68
   1   5   3    6.54    0.64
   1   5   3    5.37    0.55
   1   5   3    6.46    0.81
   1   5   3    5.83    0.65
  -2  -5  -3   12.50    1.00
  -2  -5  -3   13.55    1.12
  -2  -5  -3   13.24    0.90
  -2  -5  -3   13.04    0.95
  -2  -5  -3   13.56    0.77
  -2  -5  -3   13.24    0.86
   2   5   3   13.16    0.76
   2   5   3   13.67    0.95
   2   5   3   12.40    0.96
   2   5   3   13.55    0.92
   2   5   3   13.66    1.23
  -3  -5  -3   11.17    0.81
  -3  -5  -3   11.55    0.98
  -3  -5  -3   10.91    0.96
  -3  -5  -3   13.49    1.33
  -3  -5  -3   12.30    1.03
  -3  -5  -3   12.42    1.13
   3   5   3   10.50    1.00
   3   5   3   11.65    1.07
   3   5   3   12.65    0.86
   3   5   3   12.79    0.77
   3   5   3   11.99    0.97
   3   5   3   13.23    1.35
  -4  -5  -3    0.32    0.61
  -4  -5  -3   -0.60    0.72
  -4  -5  -3    0.21    0.53
  -4  -5  -3    0.69    0.78
  -4  -5  -3    1.09    0.69
   4   5   3    1.31    0.69
   4   5   3   -0.65    0.92
   4   5   3    0.43    0.51
   4   5   3   -0.13    0.44
   4   5   3    0.00    0.58
   4   5   3    1.22    0.79
   4   5   3    0.50    0.68
  -5  -5  -3    1.94    0.90
  -5  -5  -3    1.51    0.75
  -5  -5  -3    0.83    0.75
   5   5   3    1.43    0.86
   5   5   3    2.47    1.39
   5   5   3    1.54    0.76
   5   5   3    2.62    0.52
  -6  -5  -3    0.30    1.13
  -6  -5  -3    0.70    1.30
  -6  -5  -3    0.17    0.93
   6   5   3    0.95    1.04
   6   5   3   -0.22    1.82
   6   5   3   -0.26    0.99
  -7  -5  -3   -0.50    1.65
  -7  -5  -3   -0.36    1.44
  -7  -5  -3    0.62    1.34
   7   5   3    1.67    1.42
   7   5   3    1.94    1.41
   7   5   3   -5.45    2.40
   7  -6  -3    1.02    1.91
  -7   6   3   -2.63    1.39
  -7   6   3   -0.72    1.53
  -7   6   3    0.69    1.41
   6  -6  -3   -1.80    1.33
   6  -6  -3    1.19    0.88
  -6   6   3    0.10    0.95
  -6   6   3    1.38    1.66
  -6   6   3    0.03    1.14
   5  -6  -3   12.72    1.49
   5  -6  -3    7.89    0.86
   5  -6  -3   10.53    1.33
  -5   6   3    9.93    1.11
  -5   6   3    7.80    0.99
  -5   6   3    8.86    1.25
  -5   6   3    8.10    1.35
   4  -6  -3    8.23    1.07
   4  -6  -3    5.98    1.07
   4  -6  -3    6.35    0.65
  -4   6   3    6.92    0.78
  -4   6   3    7.32    0.97
  -4   6   3    6.21    0.82
  -4   6   3    4.97    0.96
   3  -6  -3   11.35    1.11
   3  -6  -3   12.01    1.11
   3  -6  -3   11.54    0.61
  -3   6   3   10.90    1.05
  -3   6   3   10.61    1.01
  -3   6   3   11.31    1.00
  -3   6   3   10.88    0.60
  -3   6   3   11.21    1.10
  -3   6   3   10.81    1.22
  -3   6   3   10.41    0.69
   2  -6  -3    2.50    0.31
   2  -6  -3    1.76    0.38
   2  -6  -3    2.48    0.52
   2  -6  -3    2.40    0.32
   2  -6  -3    2.14    0.64
  -2   6   3    2.15    0.34
  -2   6   3    1.33    0.52
  -2   6   3    1.81    0.49
  -2   6   3    1.71    0.54
  -2   6   3    3.05    0.61
  -2   6   3    2.16    0.40
  -2   6   3    2.07    0.84
  -2   6   3    1.99    0.68
   1  -6  -3    2.44    0.41
   1  -6  -3    2.74    0.55
   1  -6  -3    2.57    0.41
   1  -6  -3    2.59    0.60
   1  -6  -3    2.57    0.50
  -1   6   3    3.43    0.62
  -1   6   3    2.36    0.60
  -1   6   3    2.33    0.47
  -1   6   3    3.05    0.46
  -1   6   3    2.90    0.64
   0  -6  -3    4.07    0.65
   0  -6  -3    3.87    0.36
   0  -6  -3    4.21    0.46
   0  -6  -3    3.72    0.58
   0  -6  -3    4.18    0.61
   0  -6  -3    4.28    0.70
   0  -6  -3    4.86    0.57
   0   6   3    2.57    0.49
   0   6   3    3.53    0.63
   0   6   3    4.35    0.61
   0   6   3    4.52    0.74
  -1  -6  -3    2.66    0.47
  -1  -6  -3    2.33    0.73
  -1  -6  -3    3.45    0.67
  -1  -6  -3    2.33    0.41
  -1  -6  -3    2.71    0.54
   1   6   3    2.37    0.50
   1   6   3    3.14    0.78
   1   6   3    2.55    0.55
   1   6   3    2.18    0.56
   1   6   3    2.90    0.57
   1   6   3    3.17    0.43
  -2  -6  -3   44.69    1.76
  -2  -6  -3   44.43    2.04
  -2  -6  -3   45.79    1.58
  -2  -6  -3   44.17    1.89
  -2  -6  -3   44.15    1.69
   2   6   3   45.37    1.76
   2   6   3   45.54    1.83
   2   6   3   48.36    2.22
   2   6   3   49.16    1.83
   2   6   3   44.43    1.55
  -3  -6  -3    2.33    0.38
  -3  -6  -3    2.96    0.64
  -3  -6  -3    3.55    1.01
  -3  -6  -3    1.97    0.63
  -3  -6  -3    2.32    0.63
  -3  -6  -3    2.29    0.66
  -3  -6  -3    2.43    0.80
   3   6   3    1.74    0.67
   3   6   3    1.97    0.82
   3   6   3    2.57    0.95
   3   6   3    2.20    0.58
   3   6   3    2.21    0.66
  -4  -6  -3    8.51    1.04
  -4  -6  -3    9.86    1.16
  -4  -6  -3    9.00    1.19
  -4  -6  -3   10.24    1.08
  -4  -6  -3    9.80    1.13
   4   6   3    8.33    1.51
   4   6   3   10.24    1.14
   4   6   3   12.05    1.12
   4   6   3    9.41    0.99
   4   6   3    8.60    0.94
  -5  -6  -3    1.55    0.93
  -5  -6  -3    2.40    0.94
  -5  -6  -3    0.91    1.11
  -5  -6  -3    2.41    0.88
   5   6   3    2.30    0.68
   5   6   3    2.54    1.83
   5   6   3    1.83    0.82
   5   6   3    1.35    1.59
  -6  -6  -3   -0.49    1.06
  -6  -6  -3   -2.88    1.23
  -6  -6  -3    2.27    1.23
   6   6   3   -0.99    0.98
   6   6   3   -1.90    1.77
   6   6   3    0.93    1.12
  -7  -6  -3    3.89    1.67
  -7  -6  -3    0.24    1.33
  -7  -6  -3    0.47    1.81
   7   6   3    4.46    2.71
   7   6   3    1.02    1.75
   7   6   3    2.17    1.55
   7  -7  -3    1.90    2.04
  -7   7   3    0.92    1.55
  -7   7   3    0.47    1.50
  -7   7   3    0.13    1.58
   6  -7  -3    0.02    1.66
   6  -7  -3    0.00    1.30
   6  -7  -3    0.18    0.81
  -6   7   3   -0.07    1.10
   5  -7  -3    0.94    0.93
   5  -7  -3    0.96    1.05
   5  -7  -3   -0.59    0.57
  -5   7   3   -0.58    0.91
  -5   7   3   -0.72    1.29
  -5   7   3   -0.17    0.92
  -5   7   3   -0.11    0.92
   4  -7  -3    0.33    0.85
   4  -7  -3   -0.05    0.90
  -4   7   3    0.16    0.75
  -4   7   3    0.54    0.77
  -4   7   3   -0.44    0.90
  -4   7   3    0.96    0.72
   3  -7  -3  105.93    3.40
   3  -7  -3  105.88    2.71
   3  -7  -3  101.94    3.43
  -3   7   3  104.76    3.22
  -3   7   3  107.47    2.74
  -3   7   3  100.98    3.46
  -3   7   3  104.59    2.67
  -3   7   3  109.29    3.26
  -3   7   3  103.76    3.39
  -3   7   3  107.65    3.20
  -3   7   3  103.94    3.37
   2  -7  -3    0.15    0.35
   2  -7  -3    0.52    0.42
   2  -7  -3    0.01    0.35
   2  -7  -3    0.24    0.50
   2  -7  -3    0.27    0.41
  -2   7   3    0.57    0.63
  -2   7   3   -0.07    0.39
  -2   7   3   -0.22    0.61
  -2   7   3   -0.06    0.48
  -2   7   3   -0.35    0.66
  -2   7   3   -0.12    0.58
  -2   7   3   -0.31    0.26
   1  -7  -3    2.75    0.46
   1  -7  -3    2.44    0.54
   1  -7  -3    3.31    0.67
   1  -7  -3    2.54    0.44
   1  -7  -3    3.25    0.70
   1  -7  -3    2.22    0.64
  -1   7   3    3.06    0.63
  -1   7   3    2.34    0.65
  -1   7   3    2.34    0.50
  -1   7   3    2.31    0.52
  -1   7   3    2.68    0.71
   0  -7  -3    1.45    0.61
   0  -7  -3    2.56    0.67
   0  -7  -3    2.06    0.61
   0  -7  -3    2.54    0.64
   0  -7  -3    2.23    0.33
   0  -7  -3    2.47    0.54
   0  -7  -3    2.27    0.46
   0   7   3    1.65    0.51
   0   7   3    3.73    0.70
   0   7   3    2.22    0.63
   0   7   3    3.12    0.80
   0   7   3    2.58    0.51
  -1  -7  -3   13.90    0.42
  -1  -7  -3   12.22    0.96
  -1  -7  -3   13.87    1.12
  -1  -7  -3   13.13    0.81
  -1  -7  -3   13.17    0.39
  -1  -7  -3   15.24    1.27
  -1  -7  -3   12.19    1.09
   1   7   3   13.95    1.08
   1   7   3   13.82    0.98
   1   7   3   14.95    1.40
   1   7   3   15.23    1.07
   1   7   3   14.86    1.19
   1   7   3   14.57    0.90
  -2  -7  -3    2.77    0.64
  -2  -7  -3    2.06    0.87
  -2  -7  -3    2.62    0.81
  -2  -7  -3    3.34    0.67
  -2  -7  -3    2.11    0.53
   2   7   3    1.91    0.92
   2   7   3    2.27    0.55
   2   7   3    2.22    0.67
   2   7   3    1.11    0.74
   2   7   3    2.57    0.65
  -3  -7  -3    0.62    0.53
  -3  -7  -3    1.38    0.70
  -3  -7  -3    0.05    0.67
  -3  -7  -3    0.68    1.07
  -3  -7  -3   -0.19    0.31
  -3  -7  -3    1.05    0.82
   3   7   3   -0.80    0.55
   3   7   3   -0.07    0.61
   3   7   3    0.91    0.69
   3   7   3    1.16    0.82
   3   7   3    0.23    1.02
  -4  -7  -3    4.27    0.90
  -4  -7  -3    4.29    0.90
   4   7   3    3.85    0.98
   4   7   3    4.74    0.93
  -5  -7  -3    0.91    1.25
  -5  -7  -3    0.57    0.95
  -5  -7  -3   -0.25    0.80
  -5  -7  -3   -0.31    0.97
   5   7   3    0.25    0.74
   5   7   3   -0.48    0.96
   5   7   3    0.96    1.71
  -6  -7  -3    0.13    1.21
  -6  -7  -3   -1.33    1.48
  -6  -7  -3    0.41    1.24
  -6  -7  -3   -0.88    1.57
   6   7   3    2.07    2.19
   6   7   3   -1.78    1.23
  -7  -7  -3   -0.32    1.97
  -7  -7  -3    2.49    1.66
  -7  -7  -3   -0.21    1.62
  -7  -7  -3   -0.09    1.65
   7   7   3   -0.05    2.59
   7   7   3   -2.83    1.70
   7   7   3    0.26    1.84
   6  -8  -3    5.18    1.73
   6  -8  -3    3.81    1.53
  -6   8   3    3.54    1.44
  -6   8   3    1.81    1.41
   5  -8  -3    0.39    1.17
   5  -8  -3    1.00    1.09
  -5   8   3    3.94    1.18
  -5   8   3    3.08    1.41
  -5   8   3    1.68    1.07
  -5   8   3    1.28    1.13
   4  -8  -3    1.33    0.94
   4  -8  -3    1.59    0.93
  -4   8   3    1.65    0.94
  -4   8   3    2.45    1.19
  -4   8   3    0.17    0.93
  -4   8   3    0.25    0.92
   3  -8  -3    2.62    0.75
   3  -8  -3    0.85    0.80
   3  -8  -3    1.14    0.45
  -3   8   3    3.07    0.87
  -3   8   3    3.21    1.02
  -3   8   3    2.49    0.49
  -3   8   3    3.04    0.38
  -3   8   3    1.93    0.92
  -3   8   3    1.41    0.76
   2  -8  -3    3.04    0.82
   2  -8  -3    0.90    0.83
   2  -8  -3    2.26    0.54
   2  -8  -3    1.32    0.57
   2  -8  -3    2.89    0.72
  -2   8   3    2.38    0.96
  -2   8   3    2.42    0.68
  -2   8   3    1.56    0.55
  -2   8   3    2.23    0.80
  -2   8   3    1.66    0.33
  -2   8   3    2.58    0.86
   1  -8  -3    0.49    0.43
   1  -8  -3   -0.42    0.62
   1  -8  -3    0.09    0.54
   1  -8  -3    0.38    0.74
   1  -8  -3    0.04    0.64
   1  -8  -3    0.25    0.45
  -1   8   3   -0.12    0.45
  -1   8   3    0.24    0.73
  -1   8   3   -0.13    0.74
  -1   8   3   -0.20    0.44
  -1   8   3    1.17    0.68
   0  -8  -3    2.21    0.75
   0  -8  -3    0.54    0.82
   0  -8  -3    1.68    0.67
   0  -8  -3    0.90    0.67
   0  -8  -3    1.74    0.55
   0  -8  -3    2.12    0.49
   0   8   3    2.54    0.78
   0   8   3    1.52    0.59
   0   8   3    1.77    0.72
   0   8   3    1.19    0.51
   0   8   3   -0.10    0.79
  -1  -8  -3    1.77    0.77
  -1  -8  -3    1.15    0.18
  -1  -8  -3    1.79    0.66
  -1  -8  -3    0.83    0.20
  -1  -8  -3    1.43    0.88
  -1  -8  -3    0.80    0.48
  -1  -8  -3    1.25    0.60
   1   8   3    0.31    0.69
   1   8   3    1.10    0.63
   1   8   3    1.99    0.63
   1   8   3    0.74    0.51
   1   8   3    1.74    0.65
   1   8   3    1.23    0.86
  -2  -8  -3    1.66    1.02
  -2  -8  -3    0.29    0.62
  -2  -8  -3    0.67    0.75
  -2  -8  -3    0.40    0.70
  -2  -8  -3    1.16    0.52
   2   8   3   -1.00    0.92
   2   8   3    0.10    0.66
   2   8   3    0.09    0.66
   2   8   3    0.79    0.82
   2   8   3   -0.47    0.59
  -3  -8  -3    0.84    0.83
  -3  -8  -3    0.30    0.88
  -3  -8  -3    0.94    0.64
   3   8   3    0.04    0.70
   3   8   3    0.77    1.17
   3   8   3    0.81    0.73
  -4  -8  -3    1.97    0.97
  -4  -8  -3    1.29    0.75
  -4  -8  -3    1.28    1.22
   4   8   3   -0.66    0.83
   4   8   3    1.98    0.99
   4   8   3    0.69    1.53
  -5  -8  -3    1.23    1.09
  -5  -8  -3    0.01    1.18
  -5  -8  -3    0.11    1.44
  -5  -8  -3    1.30    0.93
   5   8   3    2.23    1.00
   5   8   3    2.03    1.88
   5   8   3   -0.43    1.09
  -6  -8  -3   -0.40    1.23
  -6  -8  -3   -1.28    1.39
  -6  -8  -3    2.01    1.38
  -6  -8  -3   -1.42    1.72
   6   8   3    1.13    1.54
   6   8   3   -1.81    2.21
   6  -9  -3    2.17    1.82
   6  -9  -3    2.17    1.62
  -6   9   3    0.27    1.75
  -6   9   3    3.88    1.61
   5  -9  -3   -0.04    1.49
   5  -9  -3   -0.46    1.26
  -5   9   3   -0.33    1.25
   4  -9  -3    1.21    0.99
   4  -9  -3    0.30    1.93
  -4   9   3    1.93    1.39
  -4   9   3    2.49    1.12
  -4   9   3    1.90    0.94
   3  -9  -3    9.86    0.98
   3  -9  -3    8.40    1.31
   3  -9  -3    9.93    0.55
   3  -9  -3    9.82    1.22
  -3   9   3   11.23    1.34
  -3   9   3    8.43    1.24
  -3   9   3    8.64    0.97
  -3   9   3    8.34    1.17
   2  -9  -3   -1.18    0.59
   2  -9  -3    1.20    0.71
   2  -9  -3    1.66    0.62
   2  -9  -3    0.72    0.83
  -2   9   3    0.86    0.80
  -2   9   3    1.06    0.84
  -2   9   3    0.40    0.58
  -2   9   3    1.11    0.88
  -2   9   3    0.19    0.34
   1  -9  -3    0.72    0.71
   1  -9  -3    1.01    0.51
   1  -9  -3    0.56    0.86
   1  -9  -3    1.01    0.77
   1  -9  -3    0.25    0.59
   1  -9  -3    0.09    0.72
  -1   9   3    0.84    0.96
  -1   9   3   -0.21    0.63
  -1   9   3    0.90    1.01
  -1   9   3   -0.56    0.55
  -1   9   3   -0.61    0.92
   0  -9  -3    6.63    1.04
   0  -9  -3    6.61    1.03
   0  -9  -3    7.47    0.85
   0  -9  -3    5.62    1.15
   0  -9  -3    6.70    0.93
   0  -9  -3    5.22    0.55
   0  -9  -3    5.58    1.06
   0   9   3    6.66    1.03
   0   9   3    7.01    0.87
   0   9   3    6.32    1.02
   0   9   3    5.52    1.15
   0   9   3    5.87    0.90
  -1  -9  -3    7.21    1.09
  -1  -9  -3    4.75    0.40
  -1  -9  -3    5.33    0.88
  -1  -9  -3    4.29    0.74
  -1  -9  -3    5.45    0.39
  -1  -9  -3    5.01    1.12
  -1  -9  -3    5.36    1.20
   1   9   3    6.05    1.05
   1   9   3    4.34    0.88
   1   9   3    5.45    0.86
   1   9   3    7.39    1.29
   1   9   3    4.51    0.78
  -2  -9  -3    4.87    0.73
  -2  -9  -3    6.45    1.18
  -2  -9  -3    4.53    1.47
  -2  -9  -3    4.84    0.99
   2   9   3    5.13    0.97
   2   9   3    4.95    0.88
   2   9   3    4.71    1.39
  -3  -9  -3    2.35    0.73
  -3  -9  -3    2.15    0.86
   3   9   3    3.57    1.04
   3   9   3    3.23    1.42
   3   9   3    1.20    0.96
  -4  -9  -3   -0.59    1.27
  -4  -9  -3    0.13    0.99
  -4  -9  -3   -0.61    0.82
   4   9   3   -0.17    1.64
   4   9   3   -0.58    1.04
  -5  -9  -3    2.51    1.30
  -5  -9  -3    2.65    1.22
  -5  -9  -3    1.33    1.63
   5   9   3    3.21    1.53
   5   9   3   -1.84    2.04
  -6  -9  -3    1.09    1.67
  -6  -9  -3    3.74    1.57
  -6  -9  -3   -0.32    1.98
  -6  -9  -3   -2.15    1.53
   6   9   3    1.95    2.95
   6   9   3    0.85    1.63
   6 -10  -3    1.79    1.75
   6 -10  -3    2.01    2.07
  -6  10   3   -2.34    1.72
  -6  10   3   -0.90    1.88
   5 -10  -3    0.59    1.61
   5 -10  -3    0.58    1.50
  -5  10   3   -0.05    1.33
  -5  10   3    1.77    1.64
   4 -10  -3    0.98    1.07
   4 -10  -3    1.06    1.25
  -4  10   3    3.29    1.25
  -4  10   3    2.78    1.41
   3 -10  -3    7.10    1.44
   3 -10  -3    5.42    0.61
   3 -10  -3    6.85    1.12
   3 -10  -3    4.89    0.58
   3 -10  -3    5.99    0.87
  -3  10   3    5.68    1.59
  -3  10   3    5.74    1.21
  -3  10   3    3.77    0.79
  -3  10   3    4.97    1.23
   2 -10  -3    0.94    0.71
   2 -10  -3   -0.88    0.86
   2 -10  -3   -1.31    0.77
   2 -10  -3    1.48    0.78
   2 -10  -3    1.30    0.92
  -2  10   3    0.16    0.95
  -2  10   3    0.33    0.74
  -2  10   3   -0.60    0.35
  -2  10   3   -2.70    1.19
   1 -10  -3    2.88    0.69
   1 -10  -3    2.14    1.03
   1 -10  -3    2.43    1.24
   1 -10  -3    4.33    0.84
   1 -10  -3    2.96    0.93
  -1  10   3    3.98    1.15
  -1  10   3    2.63    1.19
  -1  10   3    2.18    0.78
  -1  10   3    2.85    0.85
   0 -10  -3   15.45    1.67
   0 -10  -3   15.68    0.96
   0 -10  -3   13.18    1.69
   0 -10  -3   17.13    1.47
   0 -10  -3   16.72    1.21
   0 -10  -3   14.05    1.65
   0 -10  -3   16.12    1.53
   0  10   3   18.75    1.50
   0  10   3   18.05    1.74
   0  10   3   16.99    1.46
   0  10   3   17.95    1.92
   0  10   3   18.24    1.68
  -1 -10  -3   -0.06    0.27
  -1 -10  -3    0.70    1.13
  -1 -10  -3    1.91    1.39
  -1 -10  -3   -0.58    1.07
  -1 -10  -3    1.00    0.70
  -1 -10  -3    0.15    0.83
  -1 -10  -3    0.12    0.27
   1  10   3   -0.14    1.06
   1  10   3    1.28    0.97
   1  10   3   -1.23    0.79
   1  10   3    1.17    0.82
  -2 -10  -3   -1.21    1.01
  -2 -10  -3    0.69    0.77
  -2 -10  -3    1.98    0.94
   2  10   3    1.13    0.93
   2  10   3    0.78    1.38
   2  10   3   -1.28    0.77
  -3 -10  -3   -0.05    1.02
  -3 -10  -3    1.18    0.91
  -3 -10  -3    0.21    1.18
   3  10   3   -0.18    1.53
   3  10   3    0.03    0.97
  -4 -10  -3   -0.19    1.01
  -4 -10  -3   -0.01    0.98
  -4 -10  -3   -0.19    1.43
   4  10   3    0.40    1.26
   4  10   3   -0.15    1.94
  -5 -10  -3    2.06    1.41
  -5 -10  -3    0.82    1.19
  -5 -10  -3    0.67    1.82
   5  10   3   -1.41    1.45
   5  10   3    2.02    2.49
   5 -11  -3    0.07    1.61
   5 -11  -3    1.87    1.68
  -5  11   3    1.72    1.63
  -5  11   3    2.41    1.88
   4 -11  -3   -0.12    1.38
   4 -11  -3   -0.65    1.28
  -4  11   3    1.31    1.28
  -4  11   3   -1.26    1.57
   3 -11  -3    1.67    1.11
   3 -11  -3    0.57    1.25
  -3  11   3   -0.11    1.12
  -3  11   3    0.70    0.84
  -3  11   3    1.28    1.45
   2 -11  -3    1.83    1.13
   2 -11  -3    1.27    0.96
   2 -11  -3    2.77    1.18
   2 -11  -3    2.58    0.95
   2 -11  -3    1.82    0.96
  -2  11   3    1.46    0.39
  -2  11   3    1.79    0.85
  -2  11   3    1.25    2.47
   1 -11  -3    3.26    1.01
   1 -11  -3    1.62    0.92
   1 -11  -3    0.37    1.29
   1 -11  -3    1.70    1.02
   1 -11  -3    2.53    0.75
  -1  11   3    1.88    1.42
  -1  11   3    1.27    0.98
   0 -11  -3   -0.48    0.99
   0 -11  -3    1.19    0.56
   0 -11  -3    3.93    1.55
   0 -11  -3    1.67    1.11
   0 -11  -3    1.09    0.79
   0 -11  -3    0.08    1.10
   0  11   3    2.52    1.11
   0  11   3   -0.51    0.85
   0  11   3    1.93    1.35
  -1 -11  -3    7.46    0.53
  -1 -11  -3    9.47    1.50
  -1 -11  -3    9.61    1.17
  -1 -11  -3    8.23    1.30
  -1 -11  -3    8.75    0.58
  -1 -11  -3   10.76    1.66
   1  11   3    7.49    1.29
   1  11   3   10.68    1.89
   1  11   3   10.45    1.42
  -2 -11  -3    5.06    1.21
  -2 -11  -3    4.23    0.99
  -2 -11  -3    2.22    1.32
   2  11   3    1.80    1.58
   2  11   3    1.01    1.12
  -3 -11  -3    3.05    1.16
  -3 -11  -3   -0.30    1.15
  -3 -11  -3   -3.75    1.65
   3  11   3    2.20    2.02
   3  11   3   -0.30    1.28
  -4 -11  -3    1.08    1.22
  -4 -11  -3    1.52    1.37
  -4 -11  -3    0.41    1.66
   4  11   3   -2.09    2.16
   4  11   3    0.38    1.43
  -5 -11  -3    3.29    2.04
  -5 -11  -3    0.15    1.62
  -5 -11  -3    0.53    1.44
   5  11   3    2.64    2.82
   5  11   3    3.43    1.69
   4 -12  -3    1.01    1.64
   4 -12  -3    0.68    1.68
  -4  12   3    0.70    1.68
  -4  12   3    2.37    1.50
   3 -12  -3    0.99    1.64
   3 -12  -3    0.78    1.41
  -3  12   3    2.05    1.42
  -3  12   3   -0.52    0.94
  -3  12   3   -1.33    1.64
   2 -12  -3    2.47    1.48
   2 -12  -3   -1.45    1.14
   2 -12  -3    1.78    1.01
   2 -12  -3    3.70    1.49
  -2  12   3    0.53    1.05
  -2  12   3    4.05    1.83
  -2  12   3    0.01    1.22
   1 -12  -3    6.01    1.65
   1 -12  -3    6.05    0.98
   1 -12  -3    4.84    1.42
   1 -12  -3    4.44    1.31
  -1  12   3    4.65    1.28
  -1  12   3    3.94    1.72
   0 -12  -3    0.12    1.31
   0 -12  -3    1.89    1.25
   0 -12  -3    1.13    0.61
   0  12   3   -0.35    1.57
   0  12   3   -0.36    1.01
  -1 -12  -3    6.22    1.48
  -1 -12  -3    4.06    1.72
   1  12   3    4.40    1.25
   1  12   3    7.31    1.91
  -2 -12  -3    1.67    1.80
  -2 -12  -3   -0.89    1.02
  -2 -12  -3   -1.22    1.29
   2  12   3   -2.08    1.89
   2  12   3    0.55    1.24
  -3 -12  -3    0.52    1.23
  -3 -12  -3    2.37    1.61
  -3 -12  -3    0.60    1.70
   3  12   3   -1.35    1.37
   3  12   3    1.97    2.39
  -4 -12  -3    1.01    2.04
  -4 -12  -3    5.16    1.64
  -4 -12  -3    2.17    1.42
   4  12   3    0.52    1.61
   4  12   3   -0.17    2.52
   3 -13  -3    0.65    1.80
   3 -13  -3    0.49    1.42
  -3  13   3   -0.15    1.83
  -3  13   3   -0.94    1.58
   2 -13  -3    1.50    1.71
   2 -13  -3    0.01    1.16
  -2  13   3   -2.42    1.37
  -2  13   3    1.52    2.23
  -2  13   3   -1.26    2.06
   1 -13  -3   -0.37    1.32
   1 -13  -3    2.32    1.45
   1 -13  -3    0.61    1.00
  -1  13   3    1.62    1.87
  -1  13   3   -0.24    1.20
   0 -13  -3    0.59    1.59
   0 -13  -3   -0.80    1.50
   0  13   3   -0.93    1.25
   0  13   3    1.56    1.87
  -1 -13  -3   -0.78    1.00
  -1 -13  -3    1.26    1.62
  -1 -13  -3    2.37    1.90
  -1 -13  -3    1.70    1.51
   1  13   3    3.64    2.07
   1  13   3    2.68    1.35
  -2 -13  -3    1.32    2.03
  -2 -13  -3    0.23    1.74
  -2 -13  -3   -1.95    1.35
  -2 -13  -3    0.59    1.17
   2  13   3    4.03    2.17
   2  13   3    0.04    1.45
  -3 -13  -3    2.79    1.40
  -3 -13  -3   -1.57    2.14
  -3 -13  -3   -0.59    1.61
   3  13   3    0.77    2.45
   3  13   3    1.31    1.74
   2 -14  -3    5.42    2.13
  -2  14   3   -2.62    1.73
  -2  14   3   -1.43    1.54
  -2  14   3   -1.78    2.37
   1 -14  -3    1.60    1.80
  -1  14   3    1.99    2.60
  -1  14   3    2.67    1.59
   0 -14  -3    2.80    1.93
   0 -14  -3    3.89    1.89
   0  14   3    2.91    2.36
   0  14   3    0.63    1.70
  -1 -14  -3    0.41    1.38
  -1 -14  -3   -2.89    1.92
  -1 -14  -3   -1.99    1.96
   1  14   3   -3.39    1.60
   1  14   3    0.27    2.43
  -2 -14  -3    2.60    1.62
  -2 -14  -3   -2.61    1.99
  -2 -14  -3    1.48    2.66
  -2 -14  -3    1.43    1.90
   2  14   3   -3.30    2.74
   2  14   3    1.33    1.83
   2  14  -4   -2.63    2.37
  -2 -14   4   -4.11    1.49
  -2 -14   4    1.47    2.53
   1  14  -4    4.66    2.56
  -1 -14   4    0.43    1.47
  -1 -14   4   -0.13    1.65
  -1 -14   4    0.05    2.49
   0  14  -4    0.40    2.30
   0 -14   4    1.92    1.71
   0 -14   4    0.36    1.47
   0 -14   4    1.68    2.01
  -1  14  -4    0.28    2.25
  -1  14  -4    2.37    1.67
   1 -14   4   -0.04    1.70
   1 -14   4    0.31    2.05
  -2  14  -4    1.46    2.15
  -2  14  -4   -0.66    1.89
   2 -14   4    0.00    2.55
   2 -14   4    1.81    1.88
   3  13  -4   -1.83    1.46
   3  13  -4    1.35    2.53
  -3 -13   4    1.03    1.56
  -3 -13   4    0.49    2.13
   2  13  -4   -1.08    2.17
   2  13  -4    0.88    1.20
  -2 -13   4    2.50    1.43
  -2 -13   4    2.60    2.09
   1  13  -4    3.26    2.14
   1  13  -4    2.03    1.06
  -1 -13   4    1.72    1.56
  -1 -13   4    4.94    1.89
  -1 -13   4    5.06    1.48
   0  13  -4    6.56    2.36
   0 -13   4    1.89    1.56
   0 -13   4    1.77    1.30
   0 -13   4    1.25    1.83
  -1  13  -4   -1.58    1.36
  -1  13  -4   -2.36    1.86
   1 -13   4   -0.82    1.39
   1 -13   4    1.95    2.07
  -2  13  -4    2.95    1.54
  -2  13  -4    0.62    1.92
   2 -13   4   -0.14    1.73
   2 -13   4   -0.35    1.54
  -3  13  -4   -0.77    2.01
  -3  13  -4    1.79    1.90
   3 -13   4   -1.32    1.74
   3 -13   4    0.16    1.74
   3 -13   4    0.05    2.29
   4  12  -4   -1.10    2.31
   4  12  -4   -2.14    1.46
  -4 -12   4    0.03    1.42
  -4 -12   4   -1.42    2.07
   3  12  -4   -1.06    1.38
   3  12  -4    0.52    2.04
  -3 -12   4    1.21    1.86
  -3 -12   4   -1.70    1.21
   2  12  -4   -0.77    0.99
   2  12  -4    0.33    1.85
  -2 -12   4   -1.86    1.08
  -2 -12   4    0.11    1.70
   1  12  -4    0.91    0.87
   1  12  -4    1.00    1.74
  -1 -12   4   -2.21    1.46
  -1 -12   4    0.00    1.00
  -1 -12   4    2.35    1.37
   0  12  -4    0.77    1.25
   0  12  -4    2.15    1.65
   0  12  -4    2.13    0.67
   0 -12   4    0.50    1.18
   0 -12   4    1.12    1.50
   0 -12   4    1.60    1.06
  -1  12  -4    2.90    1.58
  -1  12  -4    0.79    1.22
   1 -12   4    4.13    1.66
   1 -12   4    3.18    1.32
  -2  12  -4    5.11    1.38
  -2  12  -4    0.11    1.53
   2 -12   4    2.61    1.41
   2 -12   4    3.83    1.63
  -3  12  -4    3.59    1.61
  -3  12  -4    2.31    1.81
   3 -12   4    2.03    1.62
   3 -12   4    3.39    1.48
   3 -12   4    2.23    1.74
  -4  12  -4   -1.02    1.70
  -4  12  -4    2.57    2.07
   4 -12   4    2.63    1.82
   4 -12   4    0.74    1.74
   4 -12   4    2.93    1.97
   5  11  -4    2.37    2.42
   5  11  -4    1.22    1.73
  -5 -11   4    3.65    2.08
  -5 -11   4    0.99    1.60
   4  11  -4    2.54    2.20
   4  11  -4    2.82    1.53
  -4 -11   4    1.35    1.18
  -4 -11   4    3.13    1.81
   3  11  -4   -1.04    1.11
   3  11  -4    1.12    1.83
  -3 -11   4   -1.22    1.50
  -3 -11   4   -0.32    1.26
  -3 -11   4   -1.22    1.04
   2  11  -4    0.74    1.59
   2  11  -4   -0.24    0.86
  -2 -11   4    0.14    1.34
  -2 -11   4   -1.05    0.86
   1  11  -4    2.31    0.86
   1  11  -4    0.99    0.87
   1  11  -4    2.31    1.44
  -1 -11   4    3.60    1.01
  -1 -11   4    2.44    1.54
   0  11  -4    9.72    1.00
   0  11  -4    9.28    1.71
   0  11  -4   10.21    1.27
   0 -11   4    6.51    1.16
   0 -11   4    7.13    1.58
   0 -11   4    8.92    1.37
  -1  11  -4   -0.10    0.84
  -1  11  -4   -0.78    1.29
  -1  11  -4   -1.51    1.23
   1 -11   4   -0.06    0.86
   1 -11   4    1.66    1.18
   1 -11   4    1.50    0.92
  -2  11  -4   -0.16    1.04
  -2  11  -4   -0.26    1.26
   2 -11   4   -0.65    1.43
   2 -11   4    2.19    1.00
   2 -11   4   -0.05    1.02
  -3  11  -4    1.66    1.29
  -3  11  -4    0.47    1.54
   3 -11   4    1.41    1.32
   3 -11   4   -1.53    1.57
  -4  11  -4   -2.38    1.36
  -4  11  -4    0.09    1.81
   4 -11   4    1.92    1.76
   4 -11   4    2.42    1.63
   4 -11   4    0.48    1.45
  -5  11  -4    0.33    1.92
  -5  11  -4   -3.47    1.55
   5 -11   4   -1.23    1.96
   5 -11   4   -1.25    1.84
   6  10  -4   -0.94    2.63
   6  10  -4   -1.31    1.79
  -6 -10   4    1.34    1.78
   5  10  -4   -1.21    1.50
   5  10  -4    2.16    2.03
  -5 -10   4   -0.10    1.74
  -5 -10   4   -0.39    1.35
   4  10  -4   -0.55    1.13
   4  10  -4   -1.74    1.14
   4  10  -4    1.34    1.74
  -4 -10   4    0.88    1.47
  -4 -10   4   -0.21    1.37
  -4 -10   4    1.11    1.16
   3  10  -4    2.10    1.07
   3  10  -4    2.50    1.50
   3  10  -4    2.30    1.01
  -3 -10   4    2.41    1.00
  -3 -10   4    3.35    1.37
  -3 -10   4    1.04    1.16
   2  10  -4   16.11    1.43
   2  10  -4   14.43    1.61
   2  10  -4   20.08    2.08
   2  10  -4   16.73    1.51
  -2 -10   4   18.88    1.53
  -2 -10   4   17.53    1.92
   1  10  -4    0.09    0.64
   1  10  -4    0.11    0.63
   1  10  -4   -1.60    0.90
   1  10  -4    0.87    0.89
  -1 -10   4    0.13    0.69
   0  10  -4    1.20    1.15
   0  10  -4    1.67    0.52
   0  10  -4    1.28    0.87
   0 -10   4   -0.56    0.81
   0 -10   4   -1.91    0.98
  -1  10  -4    6.70    1.17
  -1  10  -4    7.62    1.28
  -1  10  -4    6.90    1.30
   1 -10   4    7.50    1.26
   1 -10   4    7.03    1.02
   1 -10   4   10.10    1.42
   1 -10   4    5.85    0.99
  -2  10  -4    3.71    1.29
  -2  10  -4    2.62    1.11
   2 -10   4    4.61    0.94
   2 -10   4    2.30    1.01
   2 -10   4    4.30    1.29
  -3  10  -4    2.15    1.15
  -3  10  -4    2.17    1.37
   3 -10   4   -0.87    1.20
   3 -10   4    0.34    1.04
   3 -10   4    0.66    0.76
  -4  10  -4    2.00    1.19
  -4  10  -4   -0.80    1.49
   4 -10   4    2.04    1.51
   4 -10   4   -1.32    1.44
   4 -10   4    2.32    1.38
  -5  10  -4    1.75    1.49
  -5  10  -4    3.63    1.81
   5 -10   4    0.16    1.50
   5 -10   4   -3.32    1.74
   5 -10   4    0.93    1.84
   6   9  -4   -0.67    1.55
   6   9  -4   -0.98    2.23
  -6  -9   4    0.35    1.94
  -6  -9   4   -0.09    1.60
   5   9  -4   -0.28    1.28
   5   9  -4   -0.20    1.97
  -5  -9   4    0.69    1.51
  -5  -9   4    0.49    1.11
   4   9  -4    2.72    1.54
   4   9  -4    2.82    1.15
   4   9  -4    2.86    1.10
  -4  -9   4    2.50    1.05
  -4  -9   4    2.51    1.18
  -4  -9   4    2.71    1.32
   3   9  -4    6.14    2.85
   3   9  -4    6.82    1.01
   3   9  -4    3.76    0.97
   3   9  -4    4.86    1.05
  -3  -9   4    4.75    1.12
  -3  -9   4    6.53    1.33
  -3  -9   4    5.00    0.96
   2   9  -4    1.13    0.73
   2   9  -4    0.37    0.71
   2   9  -4    1.61    1.21
   2   9  -4    0.45    0.77
  -2  -9   4    1.47    0.79
  -2  -9   4    1.61    1.08
   1   9  -4    3.46    1.15
   1   9  -4    4.00    0.84
   1   9  -4    2.61    0.66
  -1  -9   4    2.80    1.11
  -1  -9   4    2.94    0.76
  -1  -9   4    3.39    0.89
   0   9  -4    2.30    0.75
   0   9  -4    4.37    0.58
   0   9  -4    3.65    1.04
   0  -9   4    4.69    0.87
   0  -9   4    3.78    1.05
   0  -9   4    3.25    0.80
   0  -9   4    5.77    1.30
   0  -9   4    4.07    0.86
  -1   9  -4    1.28    0.95
  -1   9  -4    2.18    0.96
  -1   9  -4   -0.12    0.69
   1  -9   4    2.69    1.24
   1  -9   4    2.63    0.94
   1  -9   4    0.92    0.71
   1  -9   4    1.01    0.65
   1  -9   4    1.13    0.78
  -2   9  -4    0.14    0.92
  -2   9  -4   -0.57    0.96
  -2   9  -4    0.16    0.79
   2  -9   4    0.19    0.68
   2  -9   4    0.24    0.73
   2  -9   4   -0.10    1.35
   2  -9   4   -0.61    1.09
  -3   9  -4    0.82    1.12
  -3   9  -4    0.03    1.08
   3  -9   4    0.25    0.61
   3  -9   4   -1.34    1.19
   3  -9   4    1.01    0.91
  -4   9  -4    1.94    1.06
  -4   9  -4    1.31    1.28
   4  -9   4    0.72    1.22
   4  -9   4    3.81    1.47
   4  -9   4    2.62    0.68
   4  -9   4    2.86    1.15
  -5   9  -4   -0.86    1.33
  -5   9  -4   -1.15    1.44
   5  -9   4    0.81    1.68
   5  -9   4   -1.68    1.55
   5  -9   4    0.22    1.23
  -6   9  -4   -3.77    1.60
  -6   9  -4    3.84    1.83
   6  -9   4   -1.00    1.66
   6  -9   4   -5.49    1.83
   6   8  -4   -0.98    1.05
   6   8  -4   -3.10    1.92
   6   8  -4    0.85    1.49
  -6  -8   4   -0.80    1.30
  -6  -8   4   -0.37    1.68
  -6  -8   4    2.06    1.52
   5   8  -4    1.98    1.24
   5   8  -4    3.67    1.50
  -5  -8   4    2.70    0.71
  -5  -8   4    1.96    1.19
  -5  -8   4    2.42    1.42
   4   8  -4    6.67    1.18
   4   8  -4    8.53    1.26
   4   8  -4    9.89    1.35
   4   8  -4    9.37    1.75
  -4  -8   4    8.46    1.45
  -4  -8   4    9.89    1.36
  -4  -8   4    6.94    1.11
   3   8  -4    1.17    1.09
   3   8  -4   -0.01    0.71
   3   8  -4   -0.17    0.73
   3   8  -4    1.09    0.76
  -3  -8   4   -0.37    0.79
  -3  -8   4    0.21    0.79
  -3  -8   4    0.57    0.68
   2   8  -4   13.26    1.18
   2   8  -4   13.68    1.53
   2   8  -4   13.40    1.25
   2   8  -4   12.26    1.26
   2   8  -4   13.80    1.18
   2   8  -4   13.58    1.32
  -2  -8   4   13.76    1.48
  -2  -8   4   13.92    1.62
  -2  -8   4   14.30    1.32
  -2  -8   4   12.34    1.14
   1   8  -4    1.33    0.53
   1   8  -4    1.27    0.53
   1   8  -4    1.10    0.91
   1   8  -4    1.45    0.45
   1   8  -4    1.89    0.66
   1   8  -4    2.20    0.86
  -1  -8   4    0.94    0.80
  -1  -8   4    1.58    0.58
  -1  -8   4   -0.48    0.94
  -1  -8   4    2.66    0.69
   0   8  -4   18.49    0.93
   0   8  -4   18.41    1.52
   0   8  -4   18.74    1.52
   0   8  -4   17.65    1.23
   0   8  -4   16.47    1.08
   0  -8   4   19.80    1.67
   0  -8   4   17.92    1.35
   0  -8   4   16.53    1.18
   0  -8   4   18.50    1.51
   0  -8   4   16.94    1.25
  -1   8  -4   13.94    1.15
  -1   8  -4   13.13    1.22
  -1   8  -4   15.96    1.56
  -1   8  -4   13.75    1.19
  -1   8  -4   13.25    1.21
   1  -8   4   14.22    1.08
   1  -8   4   13.91    1.13
   1  -8   4   13.52    1.10
   1  -8   4   12.34    1.39
   1  -8   4   17.24    1.47
  -2   8  -4    0.09    0.84
  -2   8  -4    0.40    0.85
  -2   8  -4    0.60    0.76
  -2   8  -4    0.38    0.69
  -2   8  -4    0.06    0.97
   2  -8   4    0.86    0.89
   2  -8   4    1.49    0.52
   2  -8   4    0.61    0.66
   2  -8   4    1.00    1.03
  -3   8  -4    6.86    1.25
  -3   8  -4    8.12    1.14
   3  -8   4    7.91    1.52
   3  -8   4    7.74    0.77
   3  -8   4    7.42    1.25
   3  -8   4    7.59    1.07
  -4   8  -4    2.73    1.00
  -4   8  -4    2.75    1.19
   4  -8   4    2.64    1.30
   4  -8   4    1.22    0.48
   4  -8   4    1.01    1.12
   4  -8   4    1.02    1.02
   4  -8   4    1.75    0.48
  -5   8  -4    1.38    1.33
  -5   8  -4   -1.86    1.16
   5  -8   4    1.88    1.25
   5  -8   4   -1.34    1.42
   5  -8   4   -2.60    1.44
  -6   8  -4    2.58    1.51
  -6   8  -4    0.71    1.40
   6  -8   4    0.45    1.82
   6  -8   4    1.00    1.42
   6  -8   4    1.09    1.85
   7   7  -4   -2.71    2.11
   7   7  -4   -1.38    1.72
  -7  -7   4   -0.63    1.55
  -7  -7   4    0.13    1.43
  -7  -7   4    3.98    2.02
   6   7  -4    2.91    1.03
   6   7  -4    0.89    1.37
  -6  -7   4    2.47    1.35
  -6  -7   4    3.56    1.63
  -6  -7   4    2.33    1.31
   5   7  -4    5.10    1.60
   5   7  -4    3.16    1.13
  -5  -7   4    3.21    0.94
  -5  -7   4    4.54    1.31
  -5  -7   4    3.24    1.06
  -5  -7   4    3.47    1.13
   4   7  -4    6.08    1.06
   4   7  -4    6.63    1.09
   4   7  -4    7.12    1.05
   4   7  -4    5.25    1.07
   4   7  -4    5.03    1.28
  -4  -7   4    4.09    0.45
  -4  -7   4    6.65    1.04
  -4  -7   4    6.24    1.13
  -4  -7   4    5.00    1.11
  -4  -7   4    5.02    1.73
   3   7  -4    1.19    0.71
   3   7  -4    2.14    0.69
   3   7  -4    1.31    0.70
   3   7  -4    0.35    0.85
   3   7  -4    1.08    0.63
   3   7  -4    0.36    1.02
  -3  -7   4    2.06    0.89
  -3  -7   4    0.43    0.69
  -3  -7   4    2.13    0.69
  -3  -7   4    2.37    1.13
  -3  -7   4    1.27    0.72
   2   7  -4   12.80    1.05
   2   7  -4   12.17    0.91
   2   7  -4   10.46    1.11
   2   7  -4   12.34    1.16
   2   7  -4   11.28    1.29
   2   7  -4   12.12    1.05
  -2  -7   4   11.69    1.12
  -2  -7   4   13.72    1.16
  -2  -7   4   13.93    1.43
  -2  -7   4   11.69    1.01
   1   7  -4    2.08    0.56
   1   7  -4    1.22    0.49
   1   7  -4    1.48    0.36
   1   7  -4    1.59    0.80
   1   7  -4    0.84    0.67
   1   7  -4    0.44    0.47
  -1  -7   4    1.06    0.82
  -1  -7   4    1.69    0.54
  -1  -7   4    1.06    0.69
  -1  -7   4    1.45    0.54
   0   7  -4   15.65    1.07
   0   7  -4   14.92    1.29
   0   7  -4   14.71    1.30
   0   7  -4   16.66    0.84
   0  -7   4   16.99    1.31
   0  -7   4   14.44    1.01
   0  -7   4   16.52    1.09
   0  -7   4   15.82    1.34
  -1   7  -4   -0.27    0.62
  -1   7  -4   -0.06    0.64
  -1   7  -4    0.21    0.52
  -1   7  -4   -0.16    0.48
  -1   7  -4    0.48    0.75
   1  -7   4   -0.51    0.69
   1  -7   4    0.03    0.43
   1  -7   4    0.27    0.49
   1  -7   4    0.47    0.68
   1  -7   4   -0.41    0.41
  -2   7  -4    2.64    0.67
  -2   7  -4    2.08    0.78
  -2   7  -4    3.14    0.68
  -2   7  -4    2.18    0.99
   2  -7   4    1.82    0.50
   2  -7   4    2.67    0.94
   2  -7   4    2.25    0.82
   2  -7   4    2.83    0.66
  -3   7  -4    4.71    0.83
  -3   7  -4    5.12    1.13
  -3   7  -4    3.80    0.85
  -3   7  -4    2.23    0.75
   3  -7   4    3.01    0.93
   3  -7   4    3.80    0.81
   3  -7   4    3.09    1.20
  -4   7  -4    1.92    0.91
   4  -7   4    0.83    0.94
   4  -7   4    0.08    1.11
   4  -7   4    0.47    0.87
   4  -7   4    1.21    0.39
   4  -7   4    1.69    1.38
  -5   7  -4    1.13    1.08
  -5   7  -4    2.42    1.23
   5  -7   4    2.13    1.44
   5  -7   4    2.17    0.49
   5  -7   4    3.07    1.43
   5  -7   4    3.19    1.32
  -6   7  -4   -1.85    1.19
   6  -7   4   -2.11    1.56
   6  -7   4    0.34    1.69
  -7   7  -4   -0.62    1.99
  -7   7  -4    6.30    2.13
   7   6  -4   -0.83    1.99
   7   6  -4    0.12    1.66
  -7  -6   4    0.74    1.33
  -7  -6   4    1.49    1.50
  -7  -6   4    1.64    1.82
   6   6  -4    0.22    0.78
   6   6  -4    0.02    1.51
   6   6  -4   -1.44    1.21
  -6  -6   4    0.66    1.07
  -6  -6   4    1.57    1.11
  -6  -6   4   -0.58    0.70
  -6  -6   4   -1.96    1.46
   5   6  -4    0.89    1.02
   5   6  -4   -0.20    0.69
   5   6  -4   -0.12    0.70
   5   6  -4    2.08    1.36
   5   6  -4    0.70    0.98
  -5  -6   4   -0.67    0.85
  -5  -6   4   -0.67    0.48
  -5  -6   4    2.43    1.16
  -5  -6   4   -1.03    0.72
   4   6  -4   19.52    1.48
   4   6  -4   22.61    1.78
   4   6  -4   19.92    1.56
   4   6  -4   20.21    1.49
   4   6  -4   17.72    1.36
  -4  -6   4   20.57    1.29
  -4  -6   4   20.70    1.55
  -4  -6   4   19.54    1.56
  -4  -6   4   20.20    0.78
  -4  -6   4   19.95    1.63
  -4  -6   4   19.85    2.11
  -4  -6   4   19.37    1.42
   3   6  -4    1.03    0.71
   3   6  -4    0.13    0.63
   3   6  -4   -0.29    0.58
   3   6  -4   -0.31    0.68
   3   6  -4    1.46    0.55
   3   6  -4    0.56    0.80
  -3  -6   4    0.16    0.93
  -3  -6   4    1.17    0.68
  -3  -6   4    0.02    0.66
  -3  -6   4    1.00    0.60
  -3  -6   4    1.30    0.65
   2   6  -4   -0.12    0.39
   2   6  -4    0.36    0.52
   2   6  -4   -0.25    0.40
   2   6  -4    0.37    0.36
   2   6  -4   -0.15    0.72
   2   6  -4    0.48    0.44
  -2  -6   4    0.01    0.47
  -2  -6   4    0.73    0.77
  -2  -6   4    0.43    0.54
  -2  -6   4    0.19    0.51
   1   6  -4    1.48    0.42
   1   6  -4    0.30    0.52
   1   6  -4    1.77    0.31
   1   6  -4    1.03    0.38
   1   6  -4    1.48    0.62
   1   6  -4    1.38    0.52
  -1  -6   4    0.76    0.57
  -1  -6   4    1.58    0.45
  -1  -6   4    1.14    0.47
  -1  -6   4    1.18    0.66
   0   6  -4   -0.04    0.58
   0   6  -4    0.25    0.35
   0   6  -4    0.46    0.44
   0   6  -4    0.27    0.54
   0   6  -4    0.66    0.30
   0  -6   4    0.54    0.40
   0  -6   4   -0.72    0.57
   0  -6   4    0.26    0.56
   0  -6   4    0.32    0.39
  -1   6  -4   15.40    1.21
  -1   6  -4   17.05    0.98
  -1   6  -4   16.16    1.18
  -1   6  -4   16.39    1.00
   1  -6   4   15.81    0.95
   1  -6   4   17.00    1.22
   1  -6   4   16.39    0.96
   1  -6   4   16.58    1.23
   1  -6   4   17.82    1.00
  -2   6  -4    1.92    0.70
  -2   6  -4    1.31    0.54
  -2   6  -4    1.04    0.51
  -2   6  -4    0.83    0.64
   2  -6   4    1.32    0.50
   2  -6   4    1.15    0.38
   2  -6   4    0.82    0.73
   2  -6   4    0.62    0.63
  -3   6  -4    2.02    0.71
  -3   6  -4    1.93    0.94
  -3   6  -4    2.87    0.77
  -3   6  -4    3.18    0.73
  -3   6  -4    2.76    0.74
   3  -6   4    2.73    0.29
   3  -6   4    3.46    0.98
   3  -6   4    3.50    0.68
   3  -6   4    2.77    0.45
   3  -6   4    3.28    0.28
   3  -6   4    2.45    0.88
  -4   6  -4    2.59    0.80
  -4   6  -4    3.19    0.87
  -4   6  -4    2.12    0.89
   4  -6   4    3.10    1.17
   4  -6   4    2.54    0.60
   4  -6   4    2.87    1.01
   4  -6   4    1.56    0.32
   4  -6   4    2.15    0.99
   4  -6   4    2.20    0.37
   4  -6   4    2.57    0.81
  -5   6  -4    0.07    1.02
  -5   6  -4   -0.01    0.85
   5  -6   4    1.30    1.34
   5  -6   4   -1.22    0.52
   5  -6   4    0.07    1.08
   5  -6   4   -0.31    0.81
   5  -6   4   -0.22    1.14
  -6   6  -4    0.79    1.30
  -6   6  -4    1.49    1.23
   6  -6   4    0.83    0.88
   6  -6   4   -1.29    1.59
   6  -6   4    0.32    1.55
  -7   6  -4    2.99    1.70
  -7   6  -4    0.72    1.73
   7  -6   4   -0.97    1.98
   7   5  -4   -0.05    1.58
   7   5  -4   -0.24    1.72
  -7  -5   4    0.42    1.56
  -7  -5   4   -3.97    1.26
  -7  -5   4   -1.62    1.29
   6   5  -4    0.42    1.15
   6   5  -4    0.31    0.61
   6   5  -4    0.43    1.14
   6   5  -4    0.04    1.36
  -6  -5   4    0.66    1.07
  -6  -5   4   -0.17    1.14
  -6  -5   4   -0.09    1.01
   5   5  -4    7.13    1.10
   5   5  -4    8.01    1.33
   5   5  -4    6.25    1.08
   5   5  -4    7.40    0.81
   5   5  -4    5.13    1.08
  -5  -5   4    7.58    1.29
  -5  -5   4    6.95    1.05
  -5  -5   4    7.83    1.31
  -5  -5   4    6.70    1.43
  -5  -5   4    6.76    1.03
   4   5  -4    6.55    0.96
   4   5  -4    7.40    1.20
   4   5  -4    7.30    0.82
   4   5  -4    7.81    0.94
   4   5  -4    6.02    0.88
  -4  -5   4    9.29    1.00
  -4  -5   4    8.73    0.94
  -4  -5   4    8.57    1.30
  -4  -5   4    6.65    0.98
  -4  -5   4    7.23    1.06
  -4  -5   4    6.95    1.02
   3   5  -4   11.22    0.84
   3   5  -4   13.07    1.06
   3   5  -4   13.36    1.03
   3   5  -4   12.91    1.12
   3   5  -4   13.01    1.20
  -3  -5   4   13.70    0.44
  -3  -5   4   12.82    1.14
  -3  -5   4   11.99    1.07
  -3  -5   4   13.34    1.02
  -3  -5   4   13.82    1.44
  -3  -5   4   13.28    0.94
  -3  -5   4   14.71    1.17
   2   5  -4    1.62    0.60
   2   5  -4    1.26    0.47
   2   5  -4    0.98    0.41
   2   5  -4    1.23    0.47
   2   5  -4    0.27    0.46
  -2  -5   4    0.56    0.45
  -2  -5   4    0.72    0.37
  -2  -5   4    1.67    0.53
  -2  -5   4    1.16    0.64
  -2  -5   4    0.70    0.47
   1   5  -4    5.43    0.57
   1   5  -4    5.20    0.61
   1   5  -4    5.04    0.75
   1   5  -4    5.57    0.54
   1   5  -4    5.17    0.33
   1   5  -4    5.97    0.69
  -1  -5   4    5.22    0.77
  -1  -5   4    4.40    0.71
  -1  -5   4    5.18    0.58
  -1  -5   4    3.90    0.54
   0   5  -4    7.28    0.65
   0   5  -4    6.94    0.77
   0   5  -4    8.25    0.81
   0   5  -4    8.85    0.56
   0  -5   4    7.53    0.66
   0  -5   4    8.53    0.69
   0  -5   4    8.45    0.54
   0  -5   4    9.22    0.86
   0  -5   4    6.68    0.80
  -1   5  -4   12.22    0.81
  -1   5  -4   11.21    0.77
  -1   5  -4   13.21    1.02
  -1   5  -4   11.67    0.95
   1  -5   4   10.93    0.72
   1  -5   4   12.80    0.79
   1  -5   4   12.66    1.01
   1  -5   4   11.12    1.01
   1  -5   4   12.63    0.52
   1  -5   4   12.11    0.78
  -2   5  -4    0.62    0.41
  -2   5  -4    0.73    0.44
  -2   5  -4    0.97    0.43
  -2   5  -4    0.37    0.39
  -2   5  -4    0.25    0.48
   2  -5   4   -0.49    0.50
   2  -5   4   -0.08    0.29
   2  -5   4   -0.37    0.58
   2  -5   4    0.03    0.36
   2  -5   4    0.11    0.17
  -3   5  -4    9.82    1.02
  -3   5  -4   10.07    1.08
  -3   5  -4   10.02    1.13
  -3   5  -4    9.93    0.94
  -3   5  -4    9.95    0.90
   3  -5   4   10.34    1.07
   3  -5   4   10.76    1.00
   3  -5   4   10.21    1.12
   3  -5   4   10.28    0.92
   3  -5   4    9.68    0.67
  -4   5  -4    0.42    0.65
  -4   5  -4    1.17    0.71
  -4   5  -4    0.75    0.69
  -4   5  -4   -0.50    1.00
   4  -5   4   -0.13    0.78
   4  -5   4    0.67    0.27
   4  -5   4    1.19    0.89
   4  -5   4    0.73    0.31
   4  -5   4   -1.46    0.65
   4  -5   4    0.28    0.88
   4  -5   4    0.48    0.60
  -5   5  -4    1.03    0.79
  -5   5  -4    1.52    0.97
   5  -5   4    1.11    0.63
   5  -5   4   -0.32    0.98
   5  -5   4    2.41    1.18
   5  -5   4   -0.06    1.04
  -6   5  -4    1.52    0.63
  -6   5  -4    1.10    1.23
  -6   5  -4    0.20    1.12
   6  -5   4   -4.27    1.49
   6  -5   4    1.89    1.54
   6  -5   4   -0.58    0.86
  -7   5  -4   -0.29    1.62
  -7   5  -4   -0.80    1.42
   7  -5   4    0.80    2.14
   7  -5   4    0.10    1.91
   7   4  -4   -1.75    1.39
   7   4  -4    1.05    1.48
   7   4  -4   -1.31    1.48
  -7  -4   4   -0.23    1.41
  -7  -4   4   -0.71    1.23
  -7  -4   4    0.44    1.26
   6   4  -4    0.68    1.01
   6   4  -4    0.44    1.15
   6   4  -4    0.54    1.16
   6   4  -4    0.95    0.55
   6   4  -4    0.00    1.19
  -6  -4   4    0.27    0.92
  -6  -4   4   -0.70    1.15
   5   4  -4    6.56    0.98
   5   4  -4    5.21    1.12
   5   4  -4    5.72    0.96
   5   4  -4    6.09    1.13
   5   4  -4    5.54    0.66
   5   4  -4    5.07    0.93
  -5  -4   4    4.68    0.91
  -5  -4   4    6.85    1.15
  -5  -4   4    6.12    0.96
  -5  -4   4    5.19    1.36
  -5  -4   4    5.82    0.99
  -5  -4   4    4.90    1.11
   4   4  -4    1.43    0.63
   4   4  -4    0.97    0.44
   4   4  -4    1.46    0.66
   4   4  -4    1.78    0.68
   4   4  -4    1.52    0.72
   4   4  -4    0.64    0.53
  -4  -4   4    1.47    0.56
  -4  -4   4    1.34    0.92
  -4  -4   4    0.56    0.54
  -4  -4   4    1.78    0.77
  -4  -4   4    1.02    0.62
  -4  -4   4    0.71    0.60
   3   4  -4   23.28    1.16
   3   4  -4   25.33    1.11
   3   4  -4   25.87    1.18
   3   4  -4   24.94    1.34
   3   4  -4   21.45    1.28
  -3  -4   4   25.41    1.51
  -3  -4   4   24.74    1.41
  -3  -4   4   24.89    1.27
  -3  -4   4   24.51    1.32
  -3  -4   4   24.36    1.22
  -3  -4   4   25.51    1.12
   2   4  -4   30.28    1.26
   2   4  -4   30.89    1.31
   2   4  -4   30.34    1.09
   2   4  -4   32.40    1.28
   2   4  -4   31.25    1.40
  -2  -4   4   33.41    1.36
  -2  -4   4   30.25    1.13
  -2  -4   4   33.62    1.40
  -2  -4   4   32.16    1.31
  -2  -4   4   32.42    1.50
  -2  -4   4   30.40    1.28
   1   4  -4   81.97    2.14
   1   4  -4   82.67    2.32
   1   4  -4   84.15    2.34
   1   4  -4   81.48    1.91
   1   4  -4   83.43    2.49
   1   4  -4   81.57    2.41
  -1  -4   4   82.81    2.34
  -1  -4   4   79.84    2.52
  -1  -4   4   83.76    2.30
  -1  -4   4   84.66    2.44
  -1  -4   4   85.25    2.52
   0   4  -4   30.46    1.27
   0   4  -4   29.72    1.25
   0   4  -4   27.78    1.08
   0  -4   4   28.47    1.07
   0  -4   4   29.92    1.30
   0  -4   4   29.87    0.99
   0  -4   4   26.58    1.27
  -1   4  -4   10.52    0.66
  -1   4  -4    7.96    0.76
  -1   4  -4    9.10    0.71
  -1   4  -4    9.02    0.65
   1  -4   4    9.12    0.80
   1  -4   4    9.22    0.62
   1  -4   4    9.07    0.61
   1  -4   4    8.73    0.45
   1  -4   4    8.30    0.81
  -2   4  -4   14.81    0.88
  -2   4  -4   14.75    1.04
  -2   4  -4   13.76    0.83
  -2   4  -4   13.37    0.98
  -2   4  -4   14.28    0.89
   2  -4   4   14.36    0.86
   2  -4   4   14.60    0.82
   2  -4   4   14.96    1.03
   2  -4   4   14.18    1.08
  -3   4  -4    1.10    0.42
  -3   4  -4    1.00    0.48
  -3   4  -4    1.51    0.77
  -3   4  -4    1.52    0.59
   3  -4   4    2.18    0.67
   3  -4   4    1.23    0.52
   3  -4   4    1.40    0.33
   3  -4   4    1.51    0.53
   3  -4   4    1.73    0.65
  -4   4  -4   -0.20    0.57
  -4   4  -4    0.51    0.94
  -4   4  -4    0.61    0.58
  -4   4  -4    0.66    0.62
   4  -4   4    0.94    0.74
   4  -4   4    0.35    0.24
   4  -4   4    0.50    0.77
   4  -4   4   -0.24    0.67
   4  -4   4   -0.47    0.54
   4  -4   4   -1.03    0.76
  -5   4  -4    5.30    1.03
  -5   4  -4    5.06    1.04
  -5   4  -4    4.87    0.60
   5  -4   4    3.52    1.17
   5  -4   4    7.88    1.59
   5  -4   4    4.72    1.10
   5  -4   4    6.90    0.43
  -6   4  -4    0.82    0.35
  -6   4  -4    0.48    1.05
  -6   4  -4    0.37    1.25
   6  -4   4    2.01    1.27
   6  -4   4   -0.26    1.42
   6  -4   4    0.43    0.84
  -7   4  -4    1.46    1.59
  -7   4  -4   -2.67    1.17
  -7   4  -4   -1.21    1.37
   7  -4   4   -0.41    1.29
   7  -4   4    0.48    2.14
   7  -4   4   -0.78    1.69
   8   3  -4   -0.16    2.02
   8   3  -4   -2.19    1.93
  -8  -3   4   -3.23    1.58
  -8  -3   4   -2.22    1.86
  -8  -3   4   -1.96    1.80
   7   3  -4   -1.26    1.35
   7   3  -4   -0.34    1.44
  -7  -3   4   -0.95    1.26
  -7  -3   4    0.52    1.13
  -7  -3   4   -2.54    1.47
   6   3  -4    0.08    1.02
   6   3  -4    0.51    0.80
   6   3  -4    0.32    0.54
   6   3  -4   -1.03    1.09
   6   3  -4    1.73    1.06
  -6  -3   4   -1.64    0.93
  -6  -3   4   -0.34    0.87
  -6  -3   4    1.29    0.89
   5   3  -4    0.48    0.62
   5   3  -4    1.04    0.43
   5   3  -4    0.62    0.80
   5   3  -4   -0.19    0.72
   5   3  -4   -0.77    0.70
   5   3  -4    0.63    0.75
  -5  -3   4    0.18    0.68
  -5  -3   4    1.38    0.63
  -5  -3   4   -1.33    1.03
  -5  -3   4    0.00    0.70
  -5  -3   4    0.95    0.87
  -5  -3   4    0.40    0.74
   4   3  -4    5.04    0.67
   4   3  -4    4.74    0.55
   4   3  -4    2.83    0.67
   4   3  -4    4.77    0.79
   4   3  -4    4.40    0.79
   4   3  -4    3.95    0.63
   4   3  -4    3.81    0.76
  -4  -3   4    5.75    0.89
  -4  -3   4    5.29    0.94
  -4  -3   4    5.62    0.70
  -4  -3   4    4.43    0.77
  -4  -3   4    5.28    0.68
  -4  -3   4    4.06    0.72
   3   3  -4    5.60    0.57
   3   3  -4    5.41    0.63
   3   3  -4    4.87    0.54
   3   3  -4    6.63    0.70
   3   3  -4    5.39    0.71
   3   3  -4    5.37    0.58
  -3  -3   4    5.89    0.62
  -3  -3   4    6.04    0.79
  -3  -3   4    6.08    0.67
  -3  -3   4    5.54    0.67
  -3  -3   4    6.89    0.78
  -3  -3   4    5.41    0.63
   2   3  -4    4.58    0.52
   2   3  -4    4.70    0.54
   2   3  -4    5.05    0.54
   2   3  -4    5.85    0.44
   2   3  -4    5.74    0.66
  -2  -3   4    5.45    0.62
  -2  -3   4    5.26    0.59
  -2  -3   4    4.53    0.53
  -2  -3   4    4.80    0.45
  -2  -3   4    4.43    0.53
  -2  -3   4    5.95    0.61
   1   3  -4  148.40    3.65
   1   3  -4  144.16    3.71
   1   3  -4  144.86    3.66
   1   3  -4  144.05    3.41
   1   3  -4  151.34    3.69
  -1  -3   4  149.96    3.80
  -1  -3   4  143.94    3.64
  -1  -3   4  143.55    3.75
  -1  -3   4  148.97    3.65
   0   3  -4   39.92    1.39
   0   3  -4   34.72    1.25
   0   3  -4   39.22    1.23
   0   3  -4   37.03    1.34
   0   3  -4   39.97    1.11
   0  -3   4   40.52    1.25
   0  -3   4   40.72    1.40
   0  -3   4   39.24    1.42
   0  -3   4   40.06    1.18
  -1   3  -4    0.35    0.23
  -1   3  -4    0.24    0.22
  -1   3  -4    0.57    0.32
  -1   3  -4    0.39    0.25
   1  -3   4    0.64    0.24
   1  -3   4    0.53    0.39
   1  -3   4    0.37    0.17
   1  -3   4   -0.19    0.36
   1  -3   4    0.43    0.23
   1  -3   4    0.25    0.17
  -2   3  -4    0.17    0.31
  -2   3  -4    0.20    0.27
  -2   3  -4   -0.78    0.41
  -2   3  -4    0.36    0.28
  -2   3  -4    0.29    0.32
   2  -3   4   -0.09    0.38
   2  -3   4    0.55    0.43
   2  -3   4   -0.02    0.25
   2  -3   4    0.30    0.30
  -3   3  -4    0.25    0.44
  -3   3  -4   -0.04    0.38
  -3   3  -4   -0.18    0.37
  -3   3  -4   -0.18    0.45
   3  -3   4   -0.21    0.54
   3  -3   4    0.36    0.26
   3  -3   4   -0.38    0.43
   3  -3   4   -0.31    0.54
   3  -3   4    0.18    0.34
  -4   3  -4   -0.05    0.34
  -4   3  -4    0.51    0.58
  -4   3  -4    0.88    0.84
  -4   3  -4    0.27    0.53
  -4   3  -4    0.15    0.54
   4  -3   4   -0.24    0.73
   4  -3   4    1.30    0.71
   4  -3   4   -0.16    0.63
   4  -3   4    1.62    0.68
  -5   3  -4    1.63    0.87
  -5   3  -4   -0.40    0.79
  -5   3  -4    0.50    0.74
   5  -3   4   -0.46    0.85
   5  -3   4    1.25    1.06
   5  -3   4    1.30    0.94
   5  -3   4    0.32    0.49
  -6   3  -4    1.35    1.08
  -6   3  -4   -0.84    0.94
   6  -3   4    1.21    1.43
   6  -3   4    1.29    0.94
   6  -3   4    2.12    1.35
  -7   3  -4   -1.29    1.24
  -7   3  -4   -2.38    1.44
  -7   3  -4    1.06    1.33
   7  -3   4   -0.14    1.66
   7  -3   4    1.44    2.14
   8   2  -4    1.83    1.88
   8   2  -4    3.42    2.00
  -8  -2   4    0.38    1.99
  -8  -2   4    0.61    1.77
  -8  -2   4    2.07    1.61
   7   2  -4    1.23    1.41
   7   2  -4   -0.55    1.25
  -7  -2   4   -0.27    1.23
  -7  -2   4    1.26    1.14
  -7  -2   4    1.07    1.10
   6   2  -4    7.21    0.56
   6   2  -4    8.02    1.40
   6   2  -4    5.74    1.27
   6   2  -4    8.13    1.05
   6   2  -4    4.58    0.80
  -6  -2   4    7.51    1.59
  -6  -2   4    7.97    1.13
  -6  -2   4    5.34    0.98
  -6  -2   4    6.94    1.26
  -6  -2   4    5.47    1.12
   5   2  -4    8.07    1.10
   5   2  -4    9.09    0.98
   5   2  -4    7.33    0.68
   5   2  -4    7.93    1.02
   5   2  -4    8.57    0.82
   5   2  -4   11.97    1.35
  -5  -2   4    8.11    0.96
  -5  -2   4    8.01    1.07
  -5  -2   4    8.29    1.04
  -5  -2   4    8.32    0.90
  -5  -2   4    9.15    1.28
  -5  -2   4    7.46    0.98
   4   2  -4    1.72    0.59
   4   2  -4    1.12    0.57
   4   2  -4    1.05    0.36
   4   2  -4    0.90    0.57
   4   2  -4    1.23    0.56
   4   2  -4    1.47    0.61
   4   2  -4    0.83    0.44
  -4  -2   4    1.30    0.56
  -4  -2   4    0.25    0.51
  -4  -2   4    0.98    0.48
  -4  -2   4    1.45    0.79
  -4  -2   4    0.93    0.61
  -4  -2   4    1.01    0.49
   3   2  -4    0.78    0.44
   3   2  -4    1.72    0.45
   3   2  -4    0.93    0.45
   3   2  -4    1.41    0.36
   3   2  -4    1.32    0.43
   3   2  -4    1.11    0.33
  -3  -2   4    0.72    0.33
  -3  -2   4    1.28    0.38
  -3  -2   4    1.31    0.44
  -3  -2   4    1.11    0.48
  -3  -2   4    1.24    0.40
   2   2  -4    1.13    0.24
   2   2  -4    1.34    0.29
   2   2  -4    1.15    0.30
   2   2  -4    1.64    0.33
   2   2  -4    0.93    0.28
   2   2  -4    0.33    0.33
  -2  -2   4    1.33    0.34
  -2  -2   4    1.11    0.31
  -2  -2   4    1.36    0.40
  -2  -2   4    1.16    0.39
  -2  -2   4    1.22    0.20
  -2  -2   4    1.48    0.38
  -2  -2   4    0.90    0.22
  -2  -2   4    1.28    0.35
   1   2  -4  155.60    3.50
   1   2  -4  157.85    3.46
   1   2  -4  158.74    3.83
   1   2  -4  153.88    3.75
   1   2  -4  157.68    3.73
   1   2  -4  150.61    3.73
  -1  -2   4  159.79    3.82
  -1  -2   4  151.60    3.79
  -1  -2   4  155.13    3.76
  -1  -2   4  150.81    3.81
   0   2  -4   14.46    0.60
   0   2  -4   15.26    0.72
   0   2  -4   14.93    0.49
   0   2  -4   14.67    0.61
   0   2  -4   16.18    0.73
   0  -2   4   14.25    0.62
   0  -2   4   15.27    0.62
   0  -2   4   15.67    0.76
   0  -2   4   15.47    0.71
  -1   2  -4    9.51    0.51
  -1   2  -4    9.32    0.41
  -1   2  -4    8.25    0.65
  -1   2  -4    8.86    0.60
   1  -2   4   10.33    0.65
   1  -2   4    9.28    0.63
   1  -2   4   10.35    0.53
   1  -2   4    8.79    0.40
  -2   2  -4  163.51    4.20
  -2   2  -4  160.18    3.97
  -2   2  -4  161.39    3.81
  -2   2  -4  161.68    4.01
   2  -2   4  153.73    4.17
   2  -2   4  154.40    4.03
   2  -2   4  141.21    4.11
   2  -2   4  158.76    3.80
   2  -2   4  162.97    3.83
  -3   2  -4    1.70    0.51
  -3   2  -4    0.99    0.46
  -3   2  -4    1.66    0.59
  -3   2  -4    1.48    0.30
  -3   2  -4    1.12    0.36
   3  -2   4    1.59    0.49
   3  -2   4    1.78    0.43
   3  -2   4    1.60    0.31
   3  -2   4    2.60    0.73
  -4   2  -4    2.33    0.62
  -4   2  -4    2.72    0.34
  -4   2  -4    3.39    0.69
  -4   2  -4    1.50    0.87
  -4   2  -4    3.54    0.61
   4  -2   4    3.13    0.43
   4  -2   4    2.78    0.84
   4  -2   4    3.50    0.77
   4  -2   4    3.00    0.67
   4  -2   4    3.59    0.68
  -5   2  -4    9.21    0.37
  -5   2  -4    8.49    1.16
  -5   2  -4    7.67    1.09
  -5   2  -4    8.52    1.07
   5  -2   4    8.11    1.21
   5  -2   4    9.99    1.48
   5  -2   4    9.49    0.78
   5  -2   4    8.76    1.28
  -6   2  -4    9.66    1.36
  -6   2  -4    6.76    1.13
  -6   2  -4    9.47    1.43
   6  -2   4   10.00    1.53
   6  -2   4    8.83    0.92
   6  -2   4    9.43    1.74
  -7   2  -4   -0.92    1.40
  -7   2  -4   -0.02    1.16
  -7   2  -4    1.30    1.39
   7  -2   4   -0.01    1.33
   7  -2   4    0.49    1.57
   8   1  -4   -1.26    2.01
   8   1  -4    3.87    2.09
  -8  -1   4    2.69    1.92
  -8  -1   4   -2.52    1.47
  -8  -1   4   -0.97    1.49
   7   1  -4   -0.42    1.32
   7   1  -4   -1.07    1.34
  -7  -1   4    0.36    1.40
  -7  -1   4   -0.87    1.10
  -7  -1   4    0.38    1.15
   6   1  -4    0.80    1.06
   6   1  -4    0.09    0.90
   6   1  -4    0.79    0.55
  -6  -1   4    2.07    0.88
  -6  -1   4    1.00    0.93
  -6  -1   4    2.90    1.37
  -6  -1   4   -0.74    0.64
  -6  -1   4    0.82    0.85
   5   1  -4   -0.21    0.65
   5   1  -4    0.74    0.35
   5   1  -4    0.71    0.73
   5   1  -4    0.63    0.42
   5   1  -4   -0.28    0.66
  -5  -1   4    0.73    0.52
  -5  -1   4    1.09    0.64
  -5  -1   4    0.61    0.61
  -5  -1   4   -0.55    0.84
  -5  -1   4    0.79    0.83
  -5  -1   4   -0.55    0.55
   4   1  -4    1.70    0.65
   4   1  -4    2.22    0.38
   4   1  -4    1.99    0.58
   4   1  -4    2.68    0.36
   4   1  -4    2.40    0.41
   4   1  -4    2.03    0.60
  -4  -1   4    2.48    0.68
  -4  -1   4    2.24    0.52
  -4  -1   4    2.15    0.47
  -4  -1   4    3.69    0.75
  -4  -1   4    2.57    0.60
  -4  -1   4    3.14    0.60
   3   1  -4   19.91    1.08
   3   1  -4   19.99    0.76
   3   1  -4   18.57    1.02
   3   1  -4   20.04    1.01
   3   1  -4   21.30    1.19
   3   1  -4   19.76    0.82
  -3  -1   4   21.25    0.93
  -3  -1   4   19.38    0.92
  -3  -1   4   21.50    1.06
  -3  -1   4   18.05    1.01
  -3  -1   4   21.11    1.03
  -3  -1   4   18.96    0.86
  -3  -1   4   20.17    0.95
  -3  -1   4   21.28    1.15
   2   1  -4   13.45    0.50
   2   1  -4   13.28    0.59
   2   1  -4   13.57    0.67
   2   1  -4   14.11    0.65
   2   1  -4   13.70    0.79
   2   1  -4   13.76    0.47
   2   1  -4   13.43    0.82
  -2  -1   4   12.64    0.67
  -2  -1   4   12.32    0.83
  -2  -1   4   12.49    0.59
  -2  -1   4   13.36    0.56
  -2  -1   4   13.41    0.71
  -2  -1   4   13.60    0.57
  -2  -1   4   12.09    0.90
   1   1  -4  161.43    3.59
   1   1  -4  168.28    3.83
   1   1  -4  165.43    3.70
   1   1  -4  156.32    3.85
   1   1  -4  158.84    3.69
   1   1  -4  163.41    3.93
   1   1  -4  158.20    3.68
  -1  -1   4  150.31    3.76
  -1  -1   4  169.17    3.88
  -1  -1   4  162.54    3.59
  -1  -1   4  159.98    3.68
  -1  -1   4  161.39    3.92
  -1  -1   4  161.73    3.79
   0   1  -4   82.30    2.03
   0   1  -4   83.30    2.08
   0   1  -4   83.74    1.91
   0   1  -4   81.06    2.17
   0   1  -4   80.13    2.12
   0   1  -4   86.21    2.16
   0  -1   4   81.03    2.18
   0  -1   4   84.25    2.14
   0  -1   4   86.95    2.13
   0  -1   4   87.86    2.17
   0  -1   4   82.80    2.03
   0  -1   4   83.54    1.91
  -1   1  -4    0.00    0.28
  -1   1  -4    0.18    0.10
  -1   1  -4   -0.21    0.13
  -1   1  -4    0.19    0.16
   1  -1   4   -0.02    0.20
   1  -1   4   -0.42    0.19
   1  -1   4    0.13    0.16
   1  -1   4    0.04    0.09
   1  -1   4    0.20    0.24
  -2   1  -4   62.94    1.95
  -2   1  -4   65.27    2.09
  -2   1  -4   62.81    1.69
  -2   1  -4   64.30    1.72
  -2   1  -4   64.01    1.89
   2  -1   4   63.31    1.91
   2  -1   4   64.06    1.92
   2  -1   4   64.15    1.78
   2  -1   4   64.91    2.11
  -3   1  -4   19.34    1.20
  -3   1  -4   18.60    1.08
  -3   1  -4   19.27    1.07
  -3   1  -4   19.99    0.84
  -3   1  -4   18.55    0.70
   3  -1   4   18.82    1.03
   3  -1   4   19.92    1.10
   3  -1   4   19.92    0.85
   3  -1   4   20.50    1.04
   3  -1   4   20.70    1.26
  -4   1  -4    1.27    0.54
  -4   1  -4    3.32    0.73
  -4   1  -4    0.87    0.55
  -4   1  -4    1.12    0.61
  -4   1  -4    1.27    0.37
  -4   1  -4    1.19    0.21
   4  -1   4    0.48    0.73
   4  -1   4    0.95    0.37
   4  -1   4    0.61    0.65
   4  -1   4    0.98    0.62
   4  -1   4    0.26    0.54
  -5   1  -4    5.49    1.02
  -5   1  -4    4.52    0.58
  -5   1  -4    6.14    1.42
  -5   1  -4    4.57    0.84
  -5   1  -4    3.65    0.87
  -5   1  -4    4.28    0.93
   5  -1   4    1.94    1.11
   5  -1   4    4.33    0.98
   5  -1   4    4.72    0.60
   5  -1   4    4.95    0.99
  -6   1  -4    4.98    1.20
  -6   1  -4   10.30    1.02
  -6   1  -4    7.29    1.14
  -6   1  -4    6.93    1.33
   6  -1   4    7.56    1.76
   6  -1   4    6.23    1.24
   6  -1   4    7.16    0.79
  -7   1  -4    2.50    1.46
  -7   1  -4    3.14    1.35
  -7   1  -4    1.07    1.25
   7  -1   4    2.87    1.31
   7  -1   4   -0.37    1.95
   7  -1   4    1.39    1.61
  -8   1  -4   -3.83    1.86
  -8   1  -4   -1.41    1.56
   8  -1   4   -1.33    2.29
   8  -1   4    4.93    2.97
   8  -1   4   -1.55    1.74
   8   0  -4    5.15    2.10
   8   0  -4    1.78    2.08
  -8   0   4    4.26    1.90
  -8   0   4    2.67    1.79
  -8   0   4    2.97    1.67
   7   0  -4   -1.01    1.28
   7   0  -4   -1.23    1.36
  -7   0   4   -1.59    1.08
  -7   0   4    2.30    1.14
  -7   0   4   -0.02    1.21
   6   0  -4    0.87    1.07
   6   0  -4   -0.58    0.96
  -6   0   4    0.50    0.80
  -6   0   4   -0.01    1.15
  -6   0   4    0.16    0.60
  -6   0   4   -0.51    0.86
  -6   0   4    0.05    0.79
   5   0  -4    0.08    0.80
   5   0  -4    0.18    0.71
   5   0  -4   -0.15    0.67
  -5   0   4    0.52    0.60
  -5   0   4    0.57    0.63
  -5   0   4    0.60    0.45
  -5   0   4    0.30    0.82
  -5   0   4    1.53    0.95
  -5   0   4   -0.37    0.57
  -5   0   4   -0.52    0.79
   4   0  -4   44.76    1.93
   4   0  -4   42.49    1.33
   4   0  -4   44.78    1.79
   4   0  -4   43.78    1.65
  -4   0   4   41.52    1.62
  -4   0   4   44.08    1.85
  -4   0   4   42.65    1.71
  -4   0   4   42.01    1.44
  -4   0   4   42.32    1.77
  -4   0   4   40.76    1.50
   3   0  -4   -0.16    0.34
   3   0  -4    0.15    0.25
   3   0  -4   -0.12    0.38
   3   0  -4    0.16    0.35
  -3   0   4    0.08    0.26
  -3   0   4   -0.25    0.30
  -3   0   4   -0.26    0.30
  -3   0   4    0.04    0.27
  -3   0   4    0.41    0.32
  -3   0   4   -0.33    0.30
  -3   0   4   -0.56    0.38
  -3   0   4    0.06    0.34
  -3   0   4   -0.07    0.26
  -3   0   4   -0.03    0.36
   2   0  -4  290.04    6.81
   2   0  -4  293.13    6.64
   2   0  -4  290.33    6.62
   2   0  -4  298.53    6.98
   2   0  -4  287.18    6.72
  -2   0   4  293.00    6.67
  -2   0   4  298.04    6.81
  -2   0   4  288.98    6.45
  -2   0   4  283.73    6.50
  -2   0   4  248.53    6.69
  -2   0   4  290.58    6.80
  -2   0   4  301.45    6.75
  -2   0   4  299.17    6.64
   1   0  -4    0.10    0.17
   1   0  -4   -0.23    0.14
   1   0  -4    0.01    0.15
   1   0  -4   -0.28    0.18
  -1   0   4    0.02    0.17
  -1   0   4   -0.25    0.12
  -1   0   4    0.12    0.09
  -1   0   4    0.26    0.18
  -1   0   4   -0.25    0.14
  -1   0   4   -0.08    0.09
  -1   0   4   -0.20    0.15
  -1   0   4   -0.22    0.20
  -1   0   4   -0.03    0.08
   0   0  -4  274.86    7.32
   0   0  -4  312.46    7.12
   0   0  -4  324.88    7.06
   0   0  -4  316.34    7.05
   0   0  -4  329.59    7.17
   0   0  -4  319.29    7.22
   0   0   4  330.84    7.27
   0   0   4  327.60    7.05
   0   0   4  321.74    7.05
   0   0   4  321.98    7.22
   0   0   4  318.38    7.15
   0   0   4  331.32    7.25
   0   0   4  326.85    7.01
  -1   0  -4   -0.32    0.14
  -1   0  -4    0.32    0.17
  -1   0  -4   -0.10    0.14
  -1   0  -4   -0.25    0.20
  -1   0  -4    0.46    0.28
   1   0   4   -0.01    0.26
   1   0   4    0.01    0.16
   1   0   4   -0.30    0.16
   1   0   4   -0.13    0.14
   1   0   4    0.09    0.14
  -2   0  -4    1.30    0.28
  -2   0  -4    0.83    0.32
  -2   0  -4    1.51    0.47
  -2   0  -4    0.79    0.19
  -2   0  -4    0.58    0.35
   2   0   4    1.55    0.33
   2   0   4    1.40    0.23
   2   0   4    0.77    0.26
   2   0   4    1.07    0.46
  -3   0  -4   -0.10    0.26
  -3   0  -4   -0.44    0.35
  -3   0  -4   -0.14    0.53
  -3   0  -4   -0.18    0.17
  -3   0  -4   -0.23    0.28
   3   0   4    0.94    0.55
   3   0   4   -0.01    0.37
   3   0   4   -0.16    0.36
   3   0   4   -0.05    0.30
   3   0   4   -0.02    0.37
  -4   0  -4    2.28    0.65
  -4   0  -4    1.71    0.55
  -4   0  -4    2.52    0.47
  -4   0  -4    0.92    0.60
  -4   0  -4    0.70    0.75
  -4   0  -4    1.72    0.56
   4   0   4    1.72    0.79
   4   0   4    3.04    0.66
   4   0   4    1.98    0.44
   4   0   4    0.85    0.54
   4   0   4    1.96    0.56
  -5   0  -4   -1.05    0.63
  -5   0  -4   -0.38    0.50
  -5   0  -4   -0.99    0.75
  -5   0  -4   -0.05    0.65
  -5   0  -4    0.11    0.75
   5   0   4   -0.72    0.49
   5   0   4    1.19    0.79
   5   0   4    0.29    0.96
   5   0   4    0.17    0.76
  -6   0  -4   12.91    1.49
  -6   0  -4   13.28    1.28
  -6   0  -4   11.86    1.31
  -6   0  -4   13.04    1.53
   6   0   4   14.12    1.66
   6   0   4   14.57    1.27
   6   0   4   10.89    1.73
  -7   0  -4    0.46    1.38
  -7   0  -4   -0.25    1.24
  -7   0  -4    0.72    1.15
   7   0   4    0.62    0.87
   7   0   4   -1.31    1.70
   7   0   4    2.20    1.44
  -8   0  -4    2.23    2.08
  -8   0  -4    1.97    1.83
   8   0   4    0.91    2.07
   8   0   4   -2.76    2.53
   8   0   4   -3.22    1.73
   8  -1  -4   -1.23    1.73
   8  -1  -4   -0.27    1.89
  -8   1   4    3.70    1.70
  -8   1   4   -3.00    1.58
  -8   1   4    0.61    1.73
   7  -1  -4   -1.49    1.25
   7  -1  -4    0.78    1.62
  -7   1   4    1.99    1.14
  -7   1   4   -0.27    1.08
  -7   1   4   -0.20    1.05
   6  -1  -4    2.28    1.13
   6  -1  -4    1.08    0.97
  -6   1   4    0.33    0.47
  -6   1   4    0.46    0.92
  -6   1   4    1.07    0.81
  -6   1   4    0.78    0.83
  -6   1   4    0.77    1.23
   5  -1  -4   -0.29    0.68
   5  -1  -4    0.51    0.72
   5  -1  -4   -0.28    0.74
  -5   1   4    0.33    0.61
  -5   1   4    0.94    0.66
  -5   1   4   -0.43    0.56
  -5   1   4    0.67    0.39
  -5   1   4    0.86    0.83
  -5   1   4    1.12    0.36
   4  -1  -4    1.29    0.65
   4  -1  -4    1.78    0.59
   4  -1  -4    2.73    0.59
  -4   1   4    2.22    0.58
  -4   1   4    2.18    0.63
  -4   1   4    2.41    0.47
  -4   1   4    1.66    0.61
  -4   1   4    2.23    0.36
  -4   1   4    2.23    0.58
  -4   1   4    2.01    0.73
  -4   1   4    1.26    0.56
  -4   1   4    1.94    0.36
   3  -1  -4   20.68    0.85
   3  -1  -4   18.36    1.00
   3  -1  -4   20.70    0.99
   3  -1  -4   20.57    1.13
  -3   1   4   20.36    0.99
  -3   1   4   18.86    0.97
  -3   1   4   20.17    1.02
  -3   1   4   19.81    1.11
  -3   1   4   18.77    0.73
  -3   1   4   18.68    0.94
  -3   1   4   19.64    0.85
  -3   1   4   20.51    0.82
  -3   1   4   19.48    0.99
   2  -1  -4   13.91    0.74
   2  -1  -4   13.52    0.81
   2  -1  -4   13.68    0.67
   2  -1  -4   13.27    0.74
   2  -1  -4   13.60    0.65
  -2   1   4   14.21    0.64
  -2   1   4   14.96    0.94
  -2   1   4   14.60    0.69
  -2   1   4   14.20    0.69
  -2   1   4   14.00    0.73
  -2   1   4   15.04    0.75
  -2   1   4   15.30    0.74
   1  -1  -4  150.59    3.73
   1  -1  -4  141.78    3.96
   1  -1  -4  156.95    3.74
   1  -1  -4  161.95    3.78
  -1   1   4  160.37    3.77
  -1   1   4  160.66    3.83
  -1   1   4  157.15    3.72
  -1   1   4  156.18    3.62
  -1   1   4  148.05    3.73
  -1   1   4  159.06    3.74
  -1   1   4  160.70    3.78
   0  -1  -4   82.86    1.95
   0  -1  -4   83.97    2.14
   0  -1  -4   82.60    1.81
   0  -1  -4   80.64    1.95
   0  -1  -4   79.11    1.96
   0  -1  -4   83.20    2.22
   0   1   4   81.99    1.96
   0   1   4   81.38    1.81
   0   1   4   81.98    2.12
   0   1   4   79.10    1.99
   0   1   4   84.66    2.11
   0   1   4   78.32    2.03
   0   1   4   80.20    2.16
   0   1   4   83.23    1.99
  -1  -1  -4   -0.04    0.20
  -1  -1  -4    0.19    0.23
  -1  -1  -4    0.02    0.18
  -1  -1  -4   -0.04    0.20
  -1  -1  -4    0.07    0.26
   1   1   4    0.14    0.23
   1   1   4    0.03    0.14
   1   1   4    0.37    0.32
   1   1   4    0.27    0.18
   1   1   4    0.21    0.21
  -2  -1  -4   63.58    1.68
  -2  -1  -4   71.38    2.14
  -2  -1  -4   60.17    1.94
  -2  -1  -4   64.44    1.86
  -2  -1  -4   68.27    1.96
  -2  -1  -4   65.93    1.75
   2   1   4   61.82    1.68
   2   1   4   63.75    1.94
   2   1   4   61.95    2.10
   2   1   4   60.64    1.83
   2   1   4   64.18    1.95
  -3  -1  -4   19.56    1.28
  -3  -1  -4   20.86    0.94
  -3  -1  -4   20.60    1.07
  -3  -1  -4   20.61    0.95
  -3  -1  -4   21.06    1.11
   3   1   4   21.94    1.08
   3   1   4   20.44    0.96
   3   1   4   20.19    0.70
   3   1   4   18.48    1.27
   3   1   4   19.85    1.05
   3   1   4   20.43    1.05
  -4  -1  -4    1.42    0.49
  -4  -1  -4    0.43    0.78
  -4  -1  -4   -0.03    0.55
  -4  -1  -4    0.89    0.53
  -4  -1  -4    1.59    0.51
   4   1   4    1.01    0.58
   4   1   4    0.87    0.75
   4   1   4    1.20    0.55
   4   1   4    1.20    0.46
  -5  -1  -4    3.46    0.97
  -5  -1  -4    3.98    0.81
  -5  -1  -4    4.97    0.85
  -5  -1  -4    3.45    0.94
  -5  -1  -4    4.09    0.72
   5   1   4    3.87    0.70
   5   1   4    3.53    0.92
   5   1   4    6.09    1.29
   5   1   4    4.01    0.93
  -6  -1  -4    6.73    1.17
  -6  -1  -4    6.27    1.27
  -6  -1  -4    8.48    1.20
  -6  -1  -4    5.00    0.90
   6   1   4    5.69    0.93
   6   1   4    7.57    1.36
   6   1   4    6.29    1.80
  -7  -1  -4    1.82    1.55
  -7  -1  -4    1.90    1.25
  -7  -1  -4    2.18    1.35
   7   1   4    2.30    2.07
   7   1   4    2.12    1.00
   7   1   4    1.11    1.43
  -8  -1  -4    1.14    2.03
  -8  -1  -4    4.99    1.70
   8   1   4   -1.90    1.97
   8   1   4   -1.76    2.80
   8   1   4    3.38    2.05
   8  -2  -4    1.35    2.14
   8  -2  -4   -1.83    1.72
  -8   2   4    4.19    1.69
  -8   2   4    0.73    1.63
  -8   2   4   -1.59    1.72
   7  -2  -4    1.40    1.36
   7  -2  -4    1.16    1.55
  -7   2   4   -0.09    1.17
  -7   2   4   -0.03    1.09
  -7   2   4   -1.18    1.18
   6  -2  -4    7.74    1.44
   6  -2  -4    8.10    1.28
  -6   2   4    6.55    0.59
  -6   2   4    8.25    1.43
  -6   2   4    7.67    1.16
  -6   2   4    8.45    1.11
  -6   2   4    6.07    1.17
   5  -2  -4    9.20    1.13
   5  -2  -4    8.14    1.04
   5  -2  -4    8.34    1.01
  -5   2   4    8.19    0.61
  -5   2   4   10.07    1.07
  -5   2   4    6.61    1.21
  -5   2   4    8.55    1.10
  -5   2   4    8.33    0.96
  -5   2   4    8.91    1.03
  -5   2   4    8.79    0.71
   4  -2  -4    1.35    0.55
   4  -2  -4    1.40    0.54
   4  -2  -4    2.11    0.62
  -4   2   4    1.89    0.54
  -4   2   4    1.90    0.55
  -4   2   4   -0.29    0.66
  -4   2   4    0.69    0.36
  -4   2   4    0.77    0.49
  -4   2   4    1.24    0.56
  -4   2   4    0.76    0.28
  -4   2   4    0.91    0.56
  -4   2   4    1.30    0.38
   3  -2  -4    1.25    0.44
   3  -2  -4    1.15    0.46
   3  -2  -4    0.13    0.39
   3  -2  -4    0.98    0.42
  -3   2   4    1.13    0.39
  -3   2   4    1.35    0.41
  -3   2   4    0.93    0.24
  -3   2   4    1.50    0.35
  -3   2   4    1.18    0.38
  -3   2   4    1.37    0.48
  -3   2   4    0.30    0.46
  -3   2   4    0.72    0.42
  -3   2   4    0.56    0.29
  -3   2   4    1.19    0.24
   2  -2  -4    1.26    0.37
   2  -2  -4    1.03    0.31
   2  -2  -4    1.50    0.41
   2  -2  -4    1.17    0.35
  -2   2   4    1.43    0.32
  -2   2   4    1.72    0.34
  -2   2   4    1.33    0.44
  -2   2   4    1.20    0.33
  -2   2   4    1.06    0.31
  -2   2   4    1.06    0.22
   1  -2  -4  156.08    3.81
   1  -2  -4  150.06    3.88
   1  -2  -4  159.56    3.84
   1  -2  -4  162.35    3.76
  -1   2   4  156.04    3.77
  -1   2   4  158.62    3.80
  -1   2   4  152.64    3.79
  -1   2   4  156.28    3.87
  -1   2   4  155.35    3.81
   0  -2  -4   14.78    0.65
   0  -2  -4   13.88    0.57
   0  -2  -4   13.50    0.52
   0  -2  -4   13.77    0.51
   0  -2  -4   13.86    0.66
   0  -2  -4   14.46    0.70
   0   2   4   13.29    0.59
   0   2   4   14.10    0.38
   0   2   4   13.94    0.60
   0   2   4   14.84    0.67
   0   2   4   14.72    0.64
   0   2   4   14.24    0.53
   0   2   4   14.09    0.55
   0   2   4   14.19    0.67
  -1  -2  -4    9.04    0.35
  -1  -2  -4    8.97    0.56
  -1  -2  -4    8.91    0.64
  -1  -2  -4    8.59    0.58
  -1  -2  -4    9.12    0.54
  -1  -2  -4    8.59    0.55
  -1  -2  -4    9.54    0.59
   1   2   4    9.65    0.58
   1   2   4    9.62    0.53
   1   2   4    9.39    0.68
   1   2   4    9.34    0.59
   1   2   4    9.62    0.51
  -2  -2  -4  154.28    4.06
  -2  -2  -4  157.30    4.11
  -2  -2  -4  161.23    4.04
  -2  -2  -4  158.51    3.83
  -2  -2  -4  162.57    4.26
   2   2   4  159.70    4.04
   2   2   4  160.84    4.30
   2   2   4  161.87    3.82
   2   2   4  161.43    4.11
   2   2   4  166.09    4.10
  -3  -2  -4    1.88    0.40
  -3  -2  -4    1.53    0.41
  -3  -2  -4    1.44    0.48
  -3  -2  -4    1.58    0.55
  -3  -2  -4    2.09    0.66
   3   2   4    1.05    0.52
   3   2   4    1.52    0.45
   3   2   4    1.59    0.28
   3   2   4    2.32    0.69
   3   2   4    2.11    0.46
   3   2   4    2.24    0.45
  -4  -2  -4    3.21    0.79
  -4  -2  -4    3.58    0.59
  -4  -2  -4    4.19    0.66
  -4  -2  -4    3.49    0.68
  -4  -2  -4    1.76    0.93
   4   2   4    3.39    0.73
   4   2   4    3.63    0.59
   4   2   4    1.86    0.60
   4   2   4    2.90    0.93
   4   2   4    3.03    0.32
   4   2   4    1.75    0.64
  -5  -2  -4    6.60    0.94
  -5  -2  -4    9.35    1.23
  -5  -2  -4    8.87    1.04
  -5  -2  -4   13.14    1.32
   5   2   4   10.46    1.08
   5   2   4    8.76    1.14
   5   2   4    8.91    1.50
  -6  -2  -4    6.43    1.09
  -6  -2  -4    9.26    1.44
  -6  -2  -4    8.14    1.20
  -6  -2  -4    9.11    1.37
   6   2   4    7.29    1.41
   6   2   4    9.30    1.13
  -7  -2  -4   -0.28    1.18
  -7  -2  -4    0.50    1.52
  -7  -2  -4    3.01    1.45
   7   2   4    0.04    1.08
   7   2   4   -0.63    1.34
   7   2   4    0.43    2.07
   8  -3  -4    0.53    2.47
   8  -3  -4    1.43    1.90
  -8   3   4   -0.99    1.64
  -8   3   4    0.24    1.74
  -8   3   4    1.13    1.70
   7  -3  -4   -1.84    1.39
   7  -3  -4    3.59    1.31
  -7   3   4   -0.39    1.32
  -7   3   4   -0.61    1.21
  -7   3   4    0.69    1.43
   6  -3  -4   -0.17    0.96
   6  -3  -4    1.72    1.25
  -6   3   4    0.92    1.24
  -6   3   4   -0.04    0.86
  -6   3   4    0.96    0.53
  -6   3   4    1.27    0.92
  -6   3   4    0.27    0.89
   5  -3  -4    0.04    0.84
   5  -3  -4    0.15    0.87
   5  -3  -4   -0.16    0.63
  -5   3   4    0.63    0.68
  -5   3   4   -0.47    0.80
  -5   3   4    0.23    0.15
  -5   3   4   -0.23    0.41
  -5   3   4    0.22    0.58
  -5   3   4    0.35    0.17
  -5   3   4   -0.61    0.63
  -5   3   4   -1.14    0.98
   4  -3  -4    5.45    0.76
   4  -3  -4    5.10    0.72
   4  -3  -4    4.39    0.77
   4  -3  -4    4.44    0.85
  -4   3   4    4.20    0.79
  -4   3   4    4.29    0.70
  -4   3   4    3.84    0.51
  -4   3   4    3.58    0.64
  -4   3   4    4.71    0.76
  -4   3   4    4.59    0.87
  -4   3   4    3.69    0.37
  -4   3   4    4.44    0.67
  -4   3   4    4.20    0.54
  -4   3   4    3.54    0.68
  -4   3   4    4.74    0.40
   3  -3  -4    5.31    0.74
   3  -3  -4    5.84    0.72
   3  -3  -4    4.42    0.54
  -3   3   4    4.95    0.55
  -3   3   4    5.99    0.53
  -3   3   4    7.13    0.79
  -3   3   4    5.61    0.75
  -3   3   4    5.20    0.40
  -3   3   4    7.88    0.70
  -3   3   4    5.76    0.46
  -3   3   4    4.68    0.67
  -3   3   4    5.50    0.65
   2  -3  -4    5.64    0.66
   2  -3  -4    5.11    0.63
   2  -3  -4    5.12    0.54
   2  -3  -4    4.62    0.58
  -2   3   4    4.73    0.29
  -2   3   4    5.39    0.58
  -2   3   4    5.96    0.52
  -2   3   4    5.01    0.30
  -2   3   4    4.13    0.43
  -2   3   4    5.79    0.65
  -2   3   4    5.26    0.59
  -2   3   4    5.74    0.60
   1  -3  -4  148.33    3.65
   1  -3  -4  148.07    3.53
   1  -3  -4  139.54    3.71
  -1   3   4  146.72    3.32
  -1   3   4  146.61    3.52
  -1   3   4  144.09    3.33
  -1   3   4  144.06    3.51
  -1   3   4  146.51    3.63
  -1   3   4  135.70    3.89
  -1   3   4  141.80    3.60
  -1   3   4  141.99    3.54
   0  -3  -4   39.09    1.26
   0  -3  -4   38.66    1.12
   0  -3  -4   39.31    1.15
   0  -3  -4   39.26    1.25
   0  -3  -4   38.81    1.33
   0   3   4   37.77    0.99
   0   3   4   39.38    1.42
   0   3   4   37.36    1.27
   0   3   4   38.90    1.28
   0   3   4   37.77    1.04
   0   3   4   39.10    1.32
   0   3   4   36.90    1.16
  -1  -3  -4    0.05    0.31
  -1  -3  -4    0.28    0.25
  -1  -3  -4    0.36    0.30
  -1  -3  -4    0.64    0.34
  -1  -3  -4    0.55    0.29
  -1  -3  -4   -0.06    0.13
   1   3   4    0.37    0.26
   1   3   4    0.21    0.35
   1   3   4   -0.09    0.24
   1   3   4    0.40    0.13
   1   3   4    0.13    0.25
   1   3   4    0.78    0.32
  -2  -3  -4    0.17    0.47
  -2  -3  -4    0.12    0.24
  -2  -3  -4   -0.17    0.27
  -2  -3  -4   -0.19    0.29
  -2  -3  -4    0.21    0.38
   2   3   4    0.19    0.39
   2   3   4    0.18    0.23
   2   3   4   -0.04    0.19
   2   3   4   -0.30    0.30
   2   3   4    0.41    0.24
   2   3   4    0.02    0.30
   2   3   4   -0.35    0.42
  -3  -3  -4    0.22    0.30
  -3  -3  -4    0.32    0.42
  -3  -3  -4   -0.25    0.44
  -3  -3  -4   -0.16    0.49
  -3  -3  -4    0.21    0.63
   3   3   4    0.11    0.46
   3   3   4   -0.48    0.39
   3   3   4   -0.18    0.50
   3   3   4   -0.07    0.32
   3   3   4    0.25    0.73
   3   3   4    0.19    0.31
  -4  -3  -4    0.29    0.51
  -4  -3  -4    0.79    0.55
  -4  -3  -4    1.22    0.94
  -4  -3  -4    0.27    0.61
  -4  -3  -4    1.01    0.57
   4   3   4    0.30    0.66
   4   3   4    2.11    0.96
   4   3   4    0.44    0.52
   4   3   4    0.13    0.28
   4   3   4    1.20    0.63
   4   3   4    0.88    0.49
  -5  -3  -4    0.99    0.86
  -5  -3  -4   -0.83    0.67
  -5  -3  -4    1.15    0.68
  -5  -3  -4    1.06    0.64
   5   3   4   -0.86    0.66
   5   3   4   -0.03    0.69
   5   3   4    0.48    0.22
   5   3   4   -1.18    1.10
  -6  -3  -4   -0.21    0.96
  -6  -3  -4   -2.03    0.87
  -6  -3  -4    0.69    0.88
  -6  -3  -4    1.05    1.22
   6   3   4    0.15    1.06
   6   3   4   -0.56    0.88
   6   3   4    0.20    1.74
  -7  -3  -4   -1.23    1.45
  -7  -3  -4   -1.47    1.55
  -7  -3  -4   -0.26    1.26
   7   3   4   -0.71    1.15
   7   3   4   -3.91    2.16
   7   3   4    0.97    1.44
   7  -4  -4    0.56    1.65
   7  -4  -4    0.30    1.41
  -7   4   4   -0.20    1.22
  -7   4   4   -1.47    1.13
  -7   4   4    0.16    1.22
   6  -4  -4    1.58    0.99
   6  -4  -4    3.06    1.47
  -6   4   4   -0.72    0.93
  -6   4   4    0.49    0.85
  -6   4   4    0.58    0.60
  -6   4   4    1.91    1.24
  -6   4   4   -1.47    0.85
   5  -4  -4    5.62    1.07
   5  -4  -4    4.84    0.84
  -5   4   4    5.27    0.69
  -5   4   4    4.71    0.98
  -5   4   4    5.81    0.72
  -5   4   4    4.75    0.92
  -5   4   4    6.73    1.02
   4  -4  -4    1.35    0.54
   4  -4  -4    0.95    0.68
   4  -4  -4    0.96    0.64
  -4   4   4    0.67    0.51
  -4   4   4    0.99    0.25
  -4   4   4    1.23    0.18
  -4   4   4    1.02    0.70
  -4   4   4    1.22    0.50
  -4   4   4    0.80    0.48
  -4   4   4    1.18    0.67
  -4   4   4    2.25    0.58
  -4   4   4    0.50    0.57
  -4   4   4    1.87    0.81
   3  -4  -4   24.73    1.32
   3  -4  -4   22.61    1.32
   3  -4  -4   23.44    1.06
  -3   4   4   21.88    0.97
  -3   4   4   25.39    1.10
  -3   4   4   23.81    0.80
  -3   4   4   23.42    1.31
  -3   4   4   24.87    0.98
  -3   4   4   23.21    1.32
  -3   4   4   23.54    1.25
  -3   4   4   21.08    1.24
  -3   4   4   23.83    1.18
   2  -4  -4   32.83    1.08
   2  -4  -4   29.93    1.29
   2  -4  -4   33.03    1.39
  -2   4   4   32.59    1.24
  -2   4   4   32.04    1.03
  -2   4   4   33.53    1.43
  -2   4   4   32.28    1.31
  -2   4   4   30.38    1.06
  -2   4   4   32.48    1.07
  -2   4   4   34.16    1.35
  -2   4   4   32.90    1.33
  -2   4   4   32.46    1.15
   1  -4  -4   87.13    2.53
   1  -4  -4   84.95    2.26
   1  -4  -4   85.52    2.42
   1  -4  -4   85.52    2.28
  -1   4   4   80.48    2.36
  -1   4   4   84.16    2.47
  -1   4   4   82.99    2.39
  -1   4   4   82.33    2.24
  -1   4   4   82.04    2.22
  -1   4   4   83.23    2.22
  -1   4   4   83.37    2.17
  -1   4   4   82.75    2.14
  -1   4   4   81.96    2.25
   0  -4  -4   28.20    1.13
   0  -4  -4   30.05    0.83
   0  -4  -4   30.78    1.06
   0  -4  -4   28.32    1.02
   0  -4  -4   29.39    1.21
   0   4   4   28.66    1.17
   0   4   4   30.62    1.14
   0   4   4   28.82    1.06
   0   4   4   28.96    0.82
   0   4   4   29.58    0.88
   0   4   4   28.82    1.21
   0   4   4   30.37    1.15
  -1  -4  -4    8.62    0.70
  -1  -4  -4    9.89    0.72
  -1  -4  -4    9.20    0.67
  -1  -4  -4    9.00    0.46
   1   4   4    8.44    0.62
   1   4   4    7.75    0.68
   1   4   4    7.96    0.80
   1   4   4    8.32    0.46
   1   4   4    9.98    0.69
   1   4   4    9.58    0.70
   1   4   4    9.68    0.67
  -2  -4  -4   14.24    0.92
  -2  -4  -4   14.54    1.00
  -2  -4  -4   15.11    1.10
  -2  -4  -4   14.35    0.91
  -2  -4  -4   15.71    0.90
  -2  -4  -4   15.47    0.72
   2   4   4   15.87    1.20
   2   4   4   16.05    0.80
   2   4   4   16.99    0.93
   2   4   4   15.11    0.90
   2   4   4   15.59    0.71
   2   4   4   14.31    0.58
   2   4   4   15.18    0.90
  -3  -4  -4    1.06    0.42
  -3  -4  -4    0.35    0.69
  -3  -4  -4    1.52    0.60
  -3  -4  -4    1.13    0.47
  -3  -4  -4    1.44    0.56
   3   4   4    1.00    0.41
   3   4   4    1.76    0.47
   3   4   4    2.09    0.60
   3   4   4    1.05    0.62
   3   4   4    1.38    0.39
   3   4   4    2.16    0.49
   3   4   4    1.30    0.84
  -4  -4  -4    0.69    0.60
  -4  -4  -4    1.91    1.01
  -4  -4  -4    0.75    0.53
  -4  -4  -4    0.57    0.68
  -4  -4  -4   -0.46    0.53
   4   4   4   -0.43    0.85
   4   4   4   -0.23    0.64
   4   4   4    0.03    0.68
   4   4   4   -0.27    0.54
   4   4   4    0.29    0.40
   4   4   4    0.29    0.46
  -5  -4  -4    6.85    1.09
  -5  -4  -4    7.20    1.23
  -5  -4  -4    6.51    1.05
  -5  -4  -4    8.87    1.10
   5   4   4    6.58    1.09
   5   4   4    5.21    0.93
   5   4   4    7.10    1.58
   5   4   4    5.66    0.51
  -6  -4  -4   -0.30    0.99
  -6  -4  -4    0.63    1.23
  -6  -4  -4    2.76    1.09
   6   4   4   -0.34    0.98
   6   4   4   -1.24    1.56
   6   4   4    0.23    0.95
  -7  -4  -4    0.01    1.50
  -7  -4  -4    0.73    1.52
  -7  -4  -4    0.10    1.63
   7   4   4   -0.82    1.50
   7   4   4   -1.95    2.53
   7   4   4    0.38    1.26
   7  -5  -4   -2.48    1.66
   7  -5  -4    2.29    1.33
  -7   5   4   -1.16    1.36
  -7   5   4   -0.68    1.32
  -7   5   4   -1.63    1.19
   6  -5  -4   -1.61    1.25
   6  -5  -4   -0.76    0.90
  -6   5   4   -1.41    0.73
  -6   5   4    0.22    0.99
  -6   5   4    1.89    1.41
  -6   5   4   -2.98    0.95
   5  -5  -4    6.19    0.88
   5  -5  -4    5.61    1.01
   5  -5  -4    3.77    2.04
  -5   5   4    8.26    1.15
  -5   5   4    6.63    1.34
  -5   5   4    6.80    0.90
  -5   5   4    6.63    0.86
   4  -5  -4    6.36    0.99
   4  -5  -4    6.82    1.00
   4  -5  -4    6.49    0.69
  -4   5   4    7.94    1.22
  -4   5   4    9.24    0.96
  -4   5   4    7.16    0.97
  -4   5   4    7.36    0.31
  -4   5   4    6.99    0.74
  -4   5   4    5.84    0.77
  -4   5   4    6.06    0.98
  -4   5   4    6.47    1.01
  -4   5   4    8.33    0.91
   3  -5  -4   13.93    1.12
   3  -5  -4   11.91    0.81
   3  -5  -4   13.39    1.07
  -3   5   4   13.29    1.08
  -3   5   4   13.16    0.89
  -3   5   4   11.68    1.03
  -3   5   4   12.67    0.91
  -3   5   4   12.68    1.12
  -3   5   4   12.89    0.97
  -3   5   4   11.64    0.89
  -3   5   4   13.53    1.06
  -3   5   4   11.09    0.66
   2  -5  -4    0.82    0.41
   2  -5  -4    0.86    0.31
   2  -5  -4    1.45    0.52
   2  -5  -4    1.32    0.53
  -2   5   4    1.25    0.40
  -2   5   4    1.05    0.31
  -2   5   4    1.84    0.41
  -2   5   4    0.85    0.29
  -2   5   4    1.32    0.48
  -2   5   4    1.75    0.45
  -2   5   4    0.11    0.55
  -2   5   4    1.27    0.45
  -2   5   4    0.98    0.45
   1  -5  -4    4.65    0.53
   1  -5  -4    4.95    0.36
   1  -5  -4    6.13    0.78
   1  -5  -4    4.55    0.60
   1  -5  -4    5.28    0.35
  -1   5   4    5.52    0.63
  -1   5   4    4.34    0.50
  -1   5   4    5.04    0.47
  -1   5   4    5.46    0.52
  -1   5   4    5.50    0.69
  -1   5   4    4.75    0.54
  -1   5   4    5.92    0.64
   0  -5  -4    8.67    0.50
   0  -5  -4    8.25    0.76
   0  -5  -4    7.38    0.70
   0  -5  -4    9.24    0.67
   0  -5  -4    8.54    0.68
   0  -5  -4    8.00    0.39
   0  -5  -4    8.51    0.68
   0   5   4    9.45    0.88
   0   5   4    8.07    0.67
   0   5   4    8.11    0.68
   0   5   4    8.27    0.75
   0   5   4    8.38    0.51
  -1  -5  -4   12.75    0.88
  -1  -5  -4   10.75    0.89
  -1  -5  -4   12.53    0.81
  -1  -5  -4   11.17    0.84
  -1  -5  -4   12.06    0.61
   1   5   4   11.64    0.84
   1   5   4   12.19    0.92
   1   5   4   11.54    1.04
   1   5   4   12.03    0.84
   1   5   4   12.53    0.62
   1   5   4   12.40    0.81
  -2  -5  -4    0.09    0.28
  -2  -5  -4    0.40    0.47
  -2  -5  -4   -0.24    0.44
  -2  -5  -4   -0.11    0.47
  -2  -5  -4    0.47    0.38
  -2  -5  -4   -0.13    0.60
   2   5   4    0.89    0.41
   2   5   4   -0.14    0.59
   2   5   4    0.67    0.47
   2   5   4    0.04    0.32
   2   5   4    0.89    0.44
  -3  -5  -4    9.47    1.02
  -3  -5  -4   13.41    1.01
  -3  -5  -4    9.29    0.92
  -3  -5  -4   10.31    1.17
  -3  -5  -4   11.56    0.83
  -3  -5  -4   12.61    1.19
   3   5   4   12.51    1.14
   3   5   4   12.54    0.87
   3   5   4   10.13    1.27
   3   5   4   11.32    1.03
   3   5   4   12.33    0.91
   3   5   4    9.02    1.02
   3   5   4   10.81    0.70
  -4  -5  -4    0.08    0.61
  -4  -5  -4    1.15    0.83
  -4  -5  -4    1.46    0.70
  -4  -5  -4    1.41    0.71
   4   5   4    0.93    0.62
   4   5   4    1.22    0.58
   4   5   4    0.64    0.93
   4   5   4    1.25    1.12
   4   5   4    0.51    0.71
   4   5   4    0.47    0.47
  -5  -5  -4    1.12    0.80
  -5  -5  -4    1.12    0.89
  -5  -5  -4    1.56    1.04
   5   5   4    1.94    0.91
   5   5   4    1.24    0.77
   5   5   4   -0.38    1.36
   5   5   4    2.02    0.82
  -6  -5  -4   -0.22    1.31
  -6  -5  -4   -0.44    1.04
  -6  -5  -4   -0.51    1.04
   6   5   4    1.22    0.99
   6   5   4   -0.41    1.07
   6   5   4    0.69    1.68
  -7  -5  -4    1.39    1.51
  -7  -5  -4   -1.95    1.33
  -7  -5  -4   -2.17    1.71
   7   5   4    5.45    2.78
   7   5   4    1.18    1.52
   7   5   4   -0.57    1.39
   7  -6  -4    0.91    1.47
   7  -6  -4   -2.13    1.91
  -7   6   4    0.31    1.55
  -7   6   4    2.23    1.41
  -7   6   4   -1.95    1.39
   6  -6  -4    0.09    1.46
   6  -6  -4   -0.05    0.95
  -6   6   4   -1.33    1.10
  -6   6   4    0.59    0.97
  -6   6   4    1.17    1.58
  -6   6   4   -0.94    1.09
   5  -6  -4   -0.65    0.99
   5  -6  -4    0.18    0.67
   5  -6  -4   -0.16    0.90
  -5   6   4   -0.45    0.75
  -5   6   4   -0.20    1.09
  -5   6   4    1.51    0.75
  -5   6   4   -0.29    0.90
   4  -6  -4   19.59    1.10
   4  -6  -4   20.57    1.57
   4  -6  -4   21.88    1.53
  -4   6   4   18.85    1.33
  -4   6   4   16.43    1.42
  -4   6   4   20.33    1.15
[truncated: 723,727 more chars]
